# Supplementary material for: Ligand-controlled cobalt-catalyzed remote hydroboration and alkene isomerization of allylic siloxanes
Source: Royal Society of Chemistry journal article supplement (doi:10.1039/d1cc05964e), 2021-12-02

## *Supporting Information*

### **Ligand-controlled cobalt-catalyzed remote hydroboration and alkene isomerization of allylic siloxanes**

Pei Zhao,<sup>‡</sup> Jiaxin Huang,<sup>‡</sup> Jie Li, Kezhuo Zhang, Wen Yang\* and Wanxiang Zhao\*

*State Key Laboratory of Chemo/Biosensing and Chemometrics, College of Chemistry and Chemical Engineering, Advanced Catalytic Engineering Research Center of the Ministry of Education, Hunan University, Changsha, Hunan 410082, China.*

E-mail: zhaowanxiang@hnu.edu.cn; yangwen@hnu.edu.cn

## **Contents**

|                                                                                             |            |
|---------------------------------------------------------------------------------------------|------------|
| <b>I. General Information .....</b>                                                         | <b>S1</b>  |
| <b>II. Optimization of Reaction Conditions and Substrate Scope .....</b>                    | <b>S2</b>  |
| <b>III. Synthesis of Substrates .....</b>                                                   | <b>S4</b>  |
| <b>IV. Cobalt-Catalyzed Remote Hydroboration of Allylic Siloxanes .....</b>                 | <b>S32</b> |
| <b>V. Cobalt-Catalyzed Alkene Isomerization of Allylic Siloxanes .....</b>                  | <b>S53</b> |
| <b>VI. Control Experiments and Plausible Catalytic Cycle .....</b>                          | <b>S69</b> |
| <b>VII. Gram-Scale Catalytic Reaction and Product Transformations.....</b>                  | <b>S71</b> |
| <b>VIII. References.....</b>                                                                | <b>S76</b> |
| <b><sup>1</sup>H, <sup>13</sup>C, <sup>11</sup>B, and <sup>29</sup>Si NMR Spectra .....</b> | <b>S79</b> |

## I. General Information

Unless otherwise noted, all reactions were conducted in an oven-dried vial with a magnetic stirrer under nitrogen atmosphere. Solvents were purified under nitrogen using a solvent purification system. Analytical thin layer chromatography (TLC) was performed using silica gel plates. Visualisation was by ultraviolet fluorescence, and/or phosphomolybdic acid, and/or  $\text{KMnO}_4$ . Flash column chromatography was performed using EM Science (200-300 mesh) silica gel.

$^1\text{H}$ -Nuclear Magnetic Resonance ( $^1\text{H}$ -NMR) and  $^{13}\text{C}$  Nuclear Magnetic Resonance ( $^{13}\text{C}$ -NMR) spectra were recorded on Bruker 400 MHz at 20 °C with  $\text{CDCl}_3$  as solvent, tetramethylsilane ( $\delta = 0$  ppm for  $^1\text{H}$ -NMR) and  $\text{CHCl}_3$  ( $\delta = 77.0$  ppm for  $^{13}\text{C}$ -NMR) as an internal standard. The data are reported as follows: chemical shift (ppm), multiplicity (s = singlet, d = doublet, t = triplet, q = quartet, m = multiplet, br = broad), coupling constant  $J(\text{Hz})$ , and integration. High resolution mass spectra were recorded on a Bruker Maxis System. IR spectra were collected on a Spectrum BX FTIR from Perkin-Elmer and reported in unit of  $\text{cm}^{-1}$ .

## II. Optimization of Reaction Conditions and Substrate Scope

Table S1 Optimization of reaction conditions<sup>a</sup>

| entry | ligand   | x   | base                               | solvent                    | T (°C) | time (h) | yield of <b>2a</b> (%) <sup>b</sup> | yield of <b>3</b> (%) <sup>c</sup> | Z/E <sup>c</sup> |
|-------|----------|-----|------------------------------------|----------------------------|--------|----------|-------------------------------------|------------------------------------|------------------|
| 1     | dcype    | 1.5 | -                                  | THF                        | rt     | 3        | 82                                  | <5                                 | -                |
| 2     | dcype    | 1.5 | -                                  | toluene                    | rt     | 3        | <5                                  | <5                                 | -                |
| 3     | dcype    | 1.5 | -                                  | DCE                        | rt     | 3        | 85                                  | <5                                 | -                |
| 4     | dcype    | 1.5 | -                                  | 1,4-dioxane                | rt     | 3        | 85                                  | <5                                 | -                |
| 5     | dcype    | 1.5 | -                                  | octane                     | rt     | 3        | 97                                  | <5                                 | -                |
| 6     | dcype    | 1.0 | -                                  | octane                     | rt     | 4        | 85                                  | <5                                 | -                |
| 7     | dppm     | 1.5 | -                                  | octane                     | rt     | 3        | <5                                  | 8                                  | 0.1/1            |
| 8     | dppe     | 1.5 | -                                  | octane                     | rt     | 3        | 16                                  | 20                                 | 1.2/1            |
| 9     | dppp     | 1.5 | -                                  | octane                     | rt     | 3        | 10                                  | 15                                 | 1.7/1            |
| 10    | dppb     | 1.5 | -                                  | octane                     | rt     | 3        | 5                                   | <5                                 | 1/1              |
| 11    | dppf     | 1.5 | -                                  | octane                     | rt     | 3        | 69                                  | 8                                  | 2/1              |
| 12    | dpephos  | 1.5 | -                                  | octane                     | rt     | 3        | 13                                  | 25                                 | 1.1/1            |
| 13    | xantphos | 1.5 | -                                  | octane                     | rt     | 3        | 12                                  | 46                                 | 1.9/1            |
| 14    | xantphos | 0.2 | -                                  | octane                     | 60     | 12       | <5                                  | 56                                 | 1.4/1            |
| 15    | xantphos | 0   | -                                  | octane                     | 60     | 12       | 0                                   | 0                                  | -                |
| 16    | xantphos | 0.2 | NaPF <sub>6</sub>                  | octane                     | 60     | 12       | <5                                  | 68                                 | 0.8/1            |
| 17    | xantphos | 0.2 | CF <sub>3</sub> SO <sub>3</sub> Na | octane                     | 60     | 12       | <5                                  | 78                                 | 1.4/1            |
| 18    | xantphos | 0.2 | CF <sub>3</sub> CO <sub>2</sub> Na | octane                     | 60     | 12       | <5                                  | 86                                 | 1.5/1            |
| 19    | xantphos | 0.2 | CF <sub>3</sub> CO <sub>2</sub> Na | CyH                        | 60     | 12       | <5                                  | 56                                 | 0.9/1            |
| 20    | xantphos | 0.2 | CF <sub>3</sub> CO <sub>2</sub> Na | <i>i</i> Pr <sub>2</sub> O | 60     | 12       | <5                                  | 84                                 | 1.1/1            |
| 21    | xantphos | 0.2 | CF <sub>3</sub> CO <sub>2</sub> Na | DME                        | 60     | 12       | <5                                  | 90                                 | 2.2/1            |

$\text{Cy}_2\text{R}-\text{CH}_2-\text{CH}_2-\text{PCy}_2$   
 dcype  
 $\text{Ph}_2\text{R}-\text{CH}_2-\text{CH}_2-\text{PPh}_2$   
 n = 1, dppm  
 n = 2, dppe  
 n = 3, dppp  
 n = 4, dppb  
  
 dppf  
  
 dpephos  
  
 xantphos

<sup>a</sup> Reactions were performed with **1a** (0.50 mmol) and HBpin under N<sub>2</sub>. <sup>b</sup> Yields were determined by GC analysis using dodecane as the internal standard. <sup>c</sup> Determined by <sup>1</sup>H NMR analysis of crude product using dibromomethane as the internal standard.

Table S2 Cobalt-catalyzed remote hydroboration of allylic siloxanes<sup>a</sup>

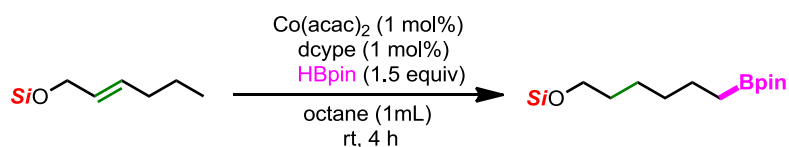

| entry | Si   | yield (%) |
|-------|------|-----------|
| 1     | TIPS | 97        |
| 2     | TES  | 88        |
| 3     | TBS  | 95        |

<sup>a</sup> Yields were determined by <sup>1</sup>H NMR with CH<sub>2</sub>Br<sub>2</sub> as the internal standard.

**Table S3** Cobalt-catalyzed alkene isomerization of allylic siloxanes<sup>a</sup>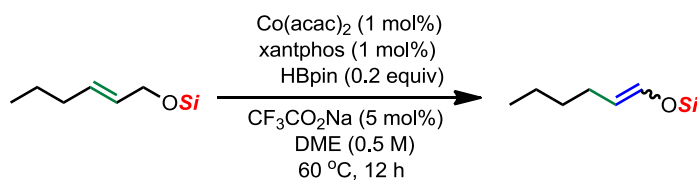

| entry | Si   | yield (%) | Z/E   |
|-------|------|-----------|-------|
| 1     | TIPS | 92        | 1.7/1 |
| 2     | TES  | 83        | 1.8/1 |
| 3     | TBS  | 95        | 1.6/1 |

<sup>a</sup> Yields and ratio of Z/E were determined by <sup>1</sup>H NMR with CH<sub>2</sub>Br<sub>2</sub> as the internal standard.

**Table S4** Screening of simple cobalt salts<sup>a</sup>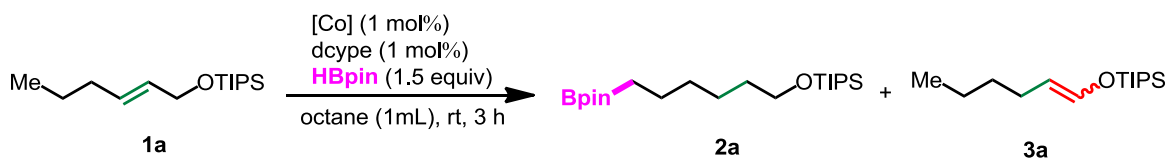

| entry | [Co]                            | yield of <b>2a</b> (%) | yield of <b>3</b> (%) |
|-------|---------------------------------|------------------------|-----------------------|
| 1     | Co(OAc) <sub>2</sub>            | <5                     | <5                    |
| 2     | Co <sub>2</sub> CO <sub>3</sub> | <5                     | no                    |
| 3     | CoCl <sub>2</sub>               | no                     | no                    |

<sup>a</sup> Yields were determined by <sup>1</sup>H NMR with CH<sub>2</sub>Br<sub>2</sub> as the internal standard.

**Table S5** Screening of the amount of HBpin<sup>a</sup>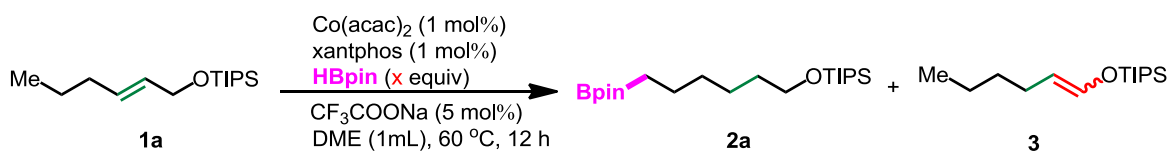

| entry | x (equiv) | yield of <b>2a</b> (%) | yield of <b>3</b> (%) | Z/E   |
|-------|-----------|------------------------|-----------------------|-------|
| 1     | 0         | 0                      | 0                     | -     |
| 2     | 0.05      | <5                     | 28                    | 1.3/1 |
| 3     | 0.10      | <5                     | 33                    | 1/1   |

<sup>a</sup> Yields and ratio of Z/E were determined by <sup>1</sup>H NMR with CH<sub>2</sub>Br<sub>2</sub> as the internal standard.



### III. Synthesis of Substrates

#### General Procedure A:

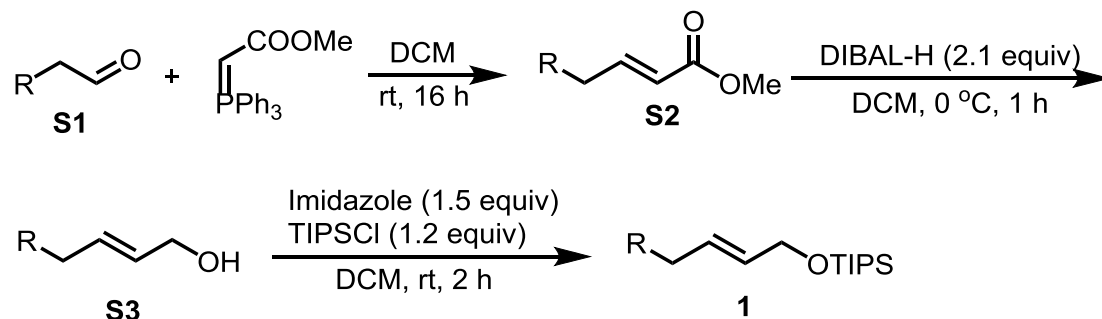

Synthesis of  $\alpha,\beta$ -unsaturated esters<sup>[1]</sup>: To a stirred solution of Methyl (triphenylphosphoranylidene)acetate (1.1 equiv) in DCM at room temperature was added **S1**, and the reaction mixture was stirred at room temperature for 16 h. After complete conversion (TLC analysis), the solvent was evaporated under reduced pressure. The resulting residue was purified by column chromatography to give  $\alpha,\beta$ -unsaturated ester **S2**.

Synthesis of allylic alcohols<sup>[2]</sup>: To a solution of **S2** in DCM at 0 °C was added DIBAL-H (1 M in hexane, 2.1 equiv) dropwise. The solution was maintained at 0 °C for 1 hour, and gradually warmed to room temperature. After complete conversion (TLC analysis), the reaction was quenched carefully with potassium sodium tartrate aqueous and stirring vigorously for 2 h, the mixture was extracted with DCM, washed with brine, dried over MgSO<sub>4</sub>, filtered, concentrated and purified by column chromatography to afford allylic alcohol **S3**.

Synthesis of silicon-protected allyl alcohols<sup>[3]</sup>: A flask was charged with allylic alcohol **S3** and imidazole (1.5 equiv). The contents were then dissolved in DCM and triisopropylchlorosilane (TIPSCl) (1.2 equiv) was added dropwise at room temperature over 2 h. After complete conversion (TLC analysis), water was added and the organic layer was separated. The aqueous phase was extracted with ethyl acetate, washed with brine, dried over MgSO<sub>4</sub>, filtered, concentrated and purified by column chromatography to afford silicon-protected allyl alcohol **1**.

**1a**, **1b**, **1c**, **1d**, **1e**, **1h**, **1i**, **1j**, **1m**, **1an**, **1ao**, **1ap**, **1aq**, and **1ar** were prepared according to **General Procedure A**.

### General Procedure B:

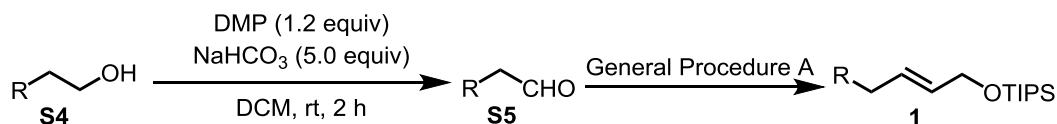

Following the literature procedure<sup>[17]</sup>, to a suspension of Dess-Martin reagent (DMP) (1.2 equiv) and NaHCO<sub>3</sub> (5.0 equiv) in DCM was added **S4** (1.0 equiv) dropwise. The reaction mixture was stirred at room temperature for 2 h. The resulting suspension was filtered through a celite pad with DCM and concentrated under vacuo. The residue was purified by silica gel column chromatography to afford **S5**.

**1f**, **1g**, **1k**, and **1l** were prepared according to **General Procedure B**.

### General Procedure C:

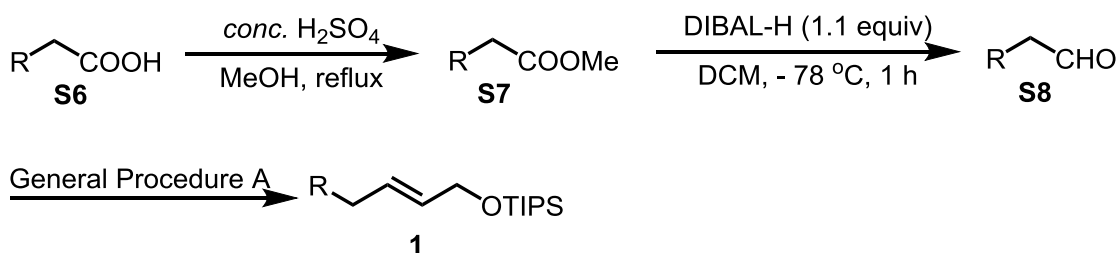

Following the literature procedure, **S6** (1.0 equiv) in MeOH and catalytic amount of *conc.* H<sub>2</sub>SO<sub>4</sub> were refluxed for 3 h. After evaporation of the solvent, the residue was extracted with EtOAc, washed with brine, dried over Na<sub>2</sub>SO<sub>4</sub>, filtered and concentrated. The residue was purified by column chromatography to afford **S7**.

DIBAL-H (1 M in hexane, 1.1 equiv) was added dropwise to a solution of **S7** (1.0 equiv) in anhydrous DCM at -78 °C. The resulting solution was stirred at -78 °C for 1 h and quenched carefully with MeOH. The reaction mixture was then poured into DCM and potassium sodium tartrate aqueous. And stirred vigorously for 2 h, the mixture was extracted with DCM, washed with brine,

dried over  $\text{MgSO}_4$ , filtered, concentrated and purified by column chromatography to afford **S8**.

**1n**, **1al**, **1am**, and **1as** were prepared according to **General Procedure C**.

#### General Procedure D:

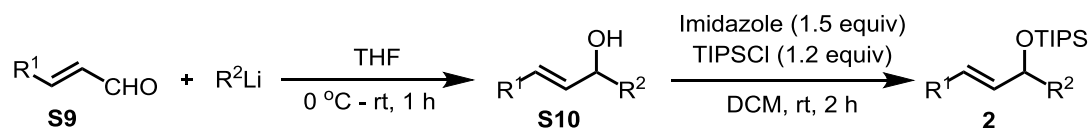

Following the literature procedure<sup>[5]</sup>, under nitrogen atmosphere, to a solution of **S9** in dry THF at 0 °C was added dropwise  $\text{R}^2\text{Li}$  over a period of 5 min, then the reaction mixture was moved to ambient temperature and stirred for 1 h, the resulting suspension was diluted with ethyl acetate and quenched by  $\text{NH}_4\text{Cl}$  (aq). The mixture was extracted by ethyl acetate, dried over anhydrous  $\text{Na}_2\text{SO}_4$ , filtered and concentrated under reduced pressure to obtaining **S10**.

The **S10** and imidazole (1.5 equiv) was dissolved in DCM, then TIPSCl (1.2 equiv) was added dropwise and the reaction mixture at room temperature over 2 h. After complete conversion (TLC analysis), water was added and the organic layer was separated. The aqueous phase was extracted with ethyl acetate, washed with brine, dried over  $\text{MgSO}_4$ , filtered, concentrated and purified by column chromatography to afford silicon-protected allyl alcohol **2**.

**1ac**, **1ad**, **1ae**, and **1af** were prepared according to **General Procedure D**.

#### General Procedure E:

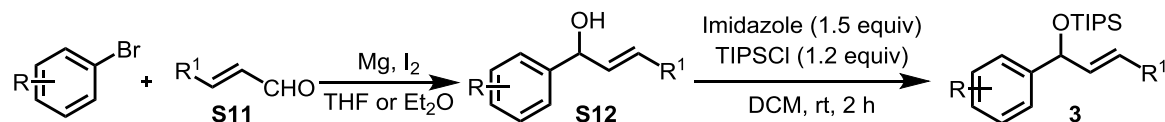

Following the literature procedure<sup>[6,7]</sup>, a dried round-bottom flask containing stir bar was charged with magnesium (1.2 equiv.), small piece of iodine and the solvent THF under nitrogen atmosphere. To the solution, aryl bromides (1.0 equiv) was dropped slowly and stirred for 30 min. After the formation of the Grignard reagent is completed, the reaction mixture is cooled to 0 °C, then 1.5 equiv of

corresponding **S11** was added. The resulting mixture was stirred for 2 h. After the completion of the reaction, the reaction mixture was washed with saturated  $\text{NH}_4\text{Cl}$  solution and extracted with ethyl acetate for several times. The combined organic layer was washed with saturated brine and dried over anhydrous  $\text{Na}_2\text{SO}_4$ . The organic layer was then concentrated under vacuum, and the crude residue was purified by silica gel column chromatography to afford the secondary alcohols **S12**.

The **S12** and imidazole (1.5 equiv) was dissolved in DCM, then TIPSCl (1.2 equiv) was added dropwise and the reaction mixture at room temperature over 2 h. After complete conversion (TLC analysis), water was added and the organic layer was separated. The aqueous phase was extracted with ethyl acetate, washed with brine, dried over  $\text{MgSO}_4$ , filtered, concentrated and purified by column chromatography to afford silicon-protected allyl alcohol **3**.

**1o**, **1p**<sup>[7]</sup>, **1q**<sup>[7]</sup>, **1r**, **1s**, **1t**, **1u**, **1v**, **1w**, **1x**, **1y**, **1z**, **1aa**, **1ab**, **1ag**, and **1ak** were prepared according to **General Procedure E**.

#### General Procedure F:

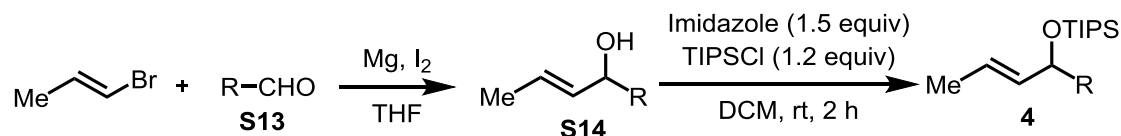

Following the literature procedure<sup>[6]</sup>, A dried round-bottom flask containing stir bar was charged with magnesium (1.2 equiv.), small piece of iodine and the solvent THF under nitrogen atmosphere. To the solution, 1-bromo-1-propene (1.0 equiv) was dropped slowly and stirred for 30 min. After the formation of the Grignard reagent is completed, the reaction mixture is cooled to 0 °C, then 1.5 equiv of corresponding **S13** was added. The resulting mixture was stirred for 2 h. After the completion of the reaction, the reaction mixture was washed with saturated  $\text{NH}_4\text{Cl}$  solution and extracted with ethyl acetate for several times. The combined organic layer was washed with saturated brine and dried over anhydrous  $\text{Na}_2\text{SO}_4$ . The organic layer was then concentrated under vacuum, and the crude residue was purified by silica gel column chromatography to afford the

secondary alcohols **S14**.

The **S14** and imidazole (1.5 equiv) was dissolved in DCM, then TIPSCl (1.2 equiv) was added dropwise and the reaction mixture at room temperature over 2 h. After complete conversion (TLC analysis), water was added and the organic layer was separated. The aqueous phase was extracted with ethyl acetate, washed with brine, dried over  $\text{MgSO}_4$ , filtered, concentrated and purified by column chromatography to afford silicon-protected allyl alcohol **4**.

**1ah** and **1ai** were prepared according to **General Procedure F**.

The yields are the last step of the following substrates.

**(E)-(Hex-2-en-1-yloxy)triisopropylsilane (1a)**<sup>[11]</sup>

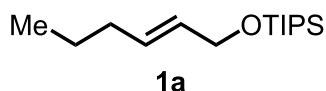

**1a** was prepared as a colorless oil in 99% yield (2.53 g, eluent: petroleum ether) following the general procedure A.

$R_f$  = 0.62 (petroleum ether)

$^1\text{H}$  NMR (400 MHz,  $\text{CDCl}_3$ )  $\delta$  5.73 – 5.63 (m, 1H), 5.61 – 5.48 (m, 1H), 4.22 – 4.16 (m, 2H), 2.06 – 1.98 (m, 2H), 1.48 – 1.32 (m, 2H), 1.18 – 1.01 (m, 21H), 0.90 (t,  $J$  = 7.4 Hz, 3H).

$^{13}\text{C}$  NMR (100 MHz,  $\text{CDCl}_3$ )  $\delta$  130.9, 129.5, 64.2, 34.4, 22.5, 18.2, 13.8, 12.2.

$^{29}\text{Si}$  NMR (79.5 MHz,  $\text{CDCl}_3$ )  $\delta$  13.53.

**(E)-(Hept-2-en-1-yloxy)triisopropylsilane (1b)**

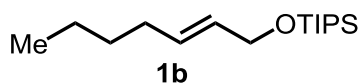

**1b** was prepared as a colorless oil in 68% yield (477 mg, eluent: petroleum ether) following the general procedure A.

$R_f$  = 0.72 (petroleum ether)

$^1\text{H}$  NMR (400 MHz,  $\text{CDCl}_3$ )  $\delta$  5.73 – 5.61 (m, 1H), 5.60 – 5.49 (m, 1H), 4.22 – 4.16 (m, 2H), 2.08 – 1.99 (m, 2H), 1.42 – 1.26 (m, 4H), 1.19 – 1.01 (m, 21H), 0.89 (t,  $J$  = 7.0 Hz, 3H).

**<sup>13</sup>C NMR (100 MHz, CDCl<sub>3</sub>)** δ 131.2, 129.3, 64.2, 32.0, 31.6, 22.4, 18.1, 14.1, 12.2.

**HRMS (ESI<sup>+</sup>)** calcd for C<sub>18</sub>H<sub>39</sub>OSi<sup>+</sup> [M+H]<sup>+</sup>: 299.2770, found: 299.2762.

**IR (neat, cm<sup>-1</sup>):** 2958, 2943, 2893, 2866, 1464, 1107, 1060, 969, 882, 681, 658.

**(E)-Triisopropyl(oct-2-en-1-yloxy)silane (1c)<sup>[8]</sup>**

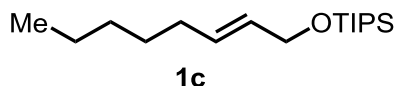

**1c** was prepared as a colorless oil in 99% yield (1.69 g, eluent: petroleum ether) following the general procedure A.

**R<sub>f</sub>** = 0.62 (petroleum ether)

**<sup>1</sup>H NMR (400 MHz, CDCl<sub>3</sub>)** δ 5.73 – 5.61 (m, 1H), 5.59 – 5.49 (m, 1H), 4.22 – 4.16 (m, 2H), 2.07 – 1.98 (m, 2H), 1.43 – 1.24 (m, 6H), 1.10 – 0.99 (m, 21H), 0.88 (t, *J* = 6.8 Hz, 3H).

**<sup>13</sup>C NMR (100 MHz, CDCl<sub>3</sub>)** δ 131.2, 129.3, 64.2, 32.3, 31.6, 29.1, 22.7, 18.1, 14.2, 12.2.

**(E)-Triisopropyl(non-2-en-1-yloxy)silane (1d)**

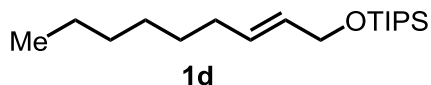

**1d** was prepared as a colorless oil in 99% yield (4.85 g, eluent: petroleum ether) following the general procedure A.

**R<sub>f</sub>** = 0.77 (petroleum ether)

**<sup>1</sup>H NMR (400 MHz, CDCl<sub>3</sub>)** δ 5.72 – 5.61 (m, 1H), 5.60 – 5.49 (m, 1H), 4.23 – 4.14 (m, 2H), 2.08 – 1.95 (m, 2H), 1.40 – 1.21 (m, 8H), 1.17 – 1.00 (m, 21H), 0.87 (m, 3H).

**<sup>13</sup>C NMR (100 MHz, CDCl<sub>3</sub>)** δ 131.2, 129.3, 64.3, 32.3, 31.9, 29.4, 29.0, 22.8, 18.2, 14.2, 12.2.

**HRMS (APCI<sup>+</sup>)** calcd for C<sub>20</sub>H<sub>43</sub>OSi<sup>+</sup> [M+H]<sup>+</sup>: 327.3078, found: 327.3085.

**IR (neat, cm<sup>-1</sup>):** 2958, 2926, 2866, 1464, 1104, 1059, 883, 681.

**(E)-(Dec-2-en-1-yloxy)triisopropylsilane (1e)**

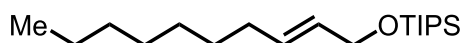

**1e**

**1e** was prepared as a colorless oil in 98% yield (1.83 g, eluent: petroleum ether) following the general procedure A.

$R_f = 0.73$  (petroleum ether)

$^1\text{H NMR}$  (400 MHz,  $\text{CDCl}_3$ )  $\delta$  5.71 – 5.62 (m, 1H), 5.58 – 5.50 (m, 1H), 4.22 – 4.16 (m, 2H), 2.07 – 1.98 (m, 2H), 1.41 – 1.21 (m, 10H), 1.16 – 1.02 (m, 21H), 0.88 (t,  $J = 6.8$  Hz, 3H).

$^{13}\text{C NMR}$  (100 MHz,  $\text{CDCl}_3$ )  $\delta$  131.2, 129.3, 64.2, 32.3, 32.0, 29.4, 29.3, 29.3, 22.8, 18.2, 14.2, 12.2.

**HRMS** (ESI $^+$ ) calcd for  $\text{C}_{19}\text{H}_{40}\text{OSiNa}^+$  [ $\text{M}+\text{Na}$ ] $^+$ : 335.2741, found: 335.2748.

**IR** (neat,  $\text{cm}^{-1}$ ): 2924, 2865, 1463, 1105, 1059, 968, 882, 681, 658.

**(E)-Triisopropyl(octadec-2-en-1-yloxy)silane (1f)**

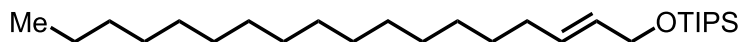

**1f**

**1f** was prepared as a colorless oil in 86% yield (2.18 g, eluent: petroleum ether) following the general procedure B.

$R_f = 0.64$  (petroleum ether)

$^1\text{H NMR}$  (400 MHz,  $\text{CDCl}_3$ )  $\delta$  5.73 – 5.61 (m, 1H), 5.59 – 5.48 (m, 1H), 4.22 – 4.16 (m, 2H), 2.07 – 1.98 (m, 2H), 1.43 – 1.20 (m, 26H), 1.17 – 1.01 (m, 21H), 0.91 – 0.86 (m, 3H).

$^{13}\text{C NMR}$  (100 MHz,  $\text{CDCl}_3$ )  $\delta$  131.2, 129.3, 64.2, 32.3, 32.1, 29.9 – 29.7 (m, 7C), 29.7, 29.5, 29.4, 29.3, 22.8, 18.2, 14.3, 12.2.

**HRMS** (ESI $^+$ ) calcd for  $\text{C}_{27}\text{H}_{56}\text{OSiNa}^+$  [ $\text{M}+\text{Na}$ ] $^+$ : 447.3993, found: 447.3994.

**IR** (neat,  $\text{cm}^{-1}$ ): 2922, 2857, 1470, 1115, 1060, 968, 884, 688.

**(E)-(Icos-2-en-1-yloxy) triisopropylsilane (1g)**

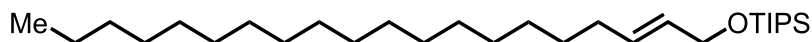

**1g**

**1g** was prepared as a colorless oil in 88% yield (3.78 g, eluent: petroleum ether) following the general procedure B.

$R_f$  = 0.65 (petroleum ether)

$^1\text{H}$  NMR (400 MHz,  $\text{CDCl}_3$ )  $\delta$  5.73 – 5.62 (m, 1H), 5.60 – 5.50 (m, 1H), 4.22 – 4.17 (m, 2H), 2.08 – 1.97 (m, 2H), 1.26 (s, 30H), 1.15 – 0.98 (m, 21H), 0.88 (t,  $J$  = 6.8 Hz, 3H).

$^{13}\text{C}$  NMR (100 MHz,  $\text{CDCl}_3$ )  $\delta$  131.2, 129.3, 64.3, 32.4, 32.1, 30.0 – 29.8 (m, 9C), 29.7, 29.5, 29.4, 29.3, 22.9, 18.2, 14.3, 12.2.

HRMS (ESI<sup>+</sup>) calcd for  $\text{C}_{29}\text{H}_{60}\text{OSiNa}^+$  [M+Na]<sup>+</sup>: 475.4306, found: 475.4309.

IR (neat,  $\text{cm}^{-1}$ ): 2922, 2853, 1460, 1112, 882, 681.

**(E)-(But-2-en-1-yloxy)triisopropylsilane (1h)**<sup>[12]</sup>

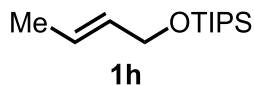

**1h** was prepared as a colorless oil in 95% yield (1.26 g, eluent: petroleum ether) following the general procedure A.

$R_f$  = 0.64 (petroleum ether)

$^1\text{H}$  NMR (400 MHz,  $\text{CDCl}_3$ )  $\delta$  5.76 – 5.64 (m, 1H), 5.63 – 5.53 (m, 1H), 4.17 (d,  $J$  = 5.2 Hz, 2H), 1.69 (d,  $J$  = 6.4 Hz, 3H), 1.15 – 1.02 (m, 21H).

$^{13}\text{C}$  NMR (100 MHz,  $\text{CDCl}_3$ )  $\delta$  130.6, 125.7, 64.1, 18.1, 17.8, 12.1.

**(E)-Triisopropyl((5-methylhex-2-en-1-yl)oxy)silane (1i)**

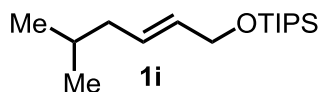

**1i** was prepared as a colourless solid in 94% yield (1.78 g, eluent: petroleum ether) following the general procedure A.

$R_f$  = 0.42 (petroleum ether)

$^1\text{H}$  NMR (400 MHz,  $\text{CDCl}_3$ )  $\delta$  5.73 – 5.61 (m, 1H), 5.60 – 5.48 (m, 1H), 4.24 – 4.17 (m, 2H), 1.97 – 1.89 (m, 2H), 1.69 – 1.55 (m, 1H), 1.17 – 1.04 (m, 21H), 0.89 (d,  $J$  = 6.6 Hz, 6H).



**$^{13}\text{C}$  NMR (100 MHz,  $\text{CDCl}_3$ )**  $\delta$  130.5, 129.7, 64.2, 41.7, 28.5, 22.4, 18.2, 12.2.

**HRMS (ESI $^+$ )** calcd for  $\text{C}_{16}\text{H}_{35}\text{OSi}^+$   $[\text{M}+\text{H}]^+$ : 271.2457, found: 271.2458.

**IR (neat,  $\text{cm}^{-1}$ ):** 2958, 2945, 2894, 2867, 1104, 882, 681.

**(*E*)-((4-Ethylhex-2-en-1-yl)oxy)triisopropylsilane (1j)**

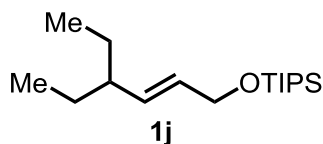

**1j** was prepared as a colourless solid in 99% yield (1.49 g, eluent: petroleum ether) following the general procedure A.

**$R_f$**  = 0.80 (petroleum ether)

**$^1\text{H}$  NMR (400 MHz,  $\text{CDCl}_3$ )**  $\delta$  5.56 – 5.46 (m, 1H), 5.44 – 5.34 (m, 1H), 4.25 – 4.19 (m, 2H), 1.84 – 1.72 (m, 1H), 1.48 – 1.32 (m, 2H), 1.32 – 1.18 (m, 2H), 1.21 – 1.02 (m, 21H), 0.84 (t,  $J$  = 7.4 Hz, 6H).

**$^{13}\text{C}$  NMR (100 MHz,  $\text{CDCl}_3$ )**  $\delta$  134.8, 129.6, 64.2, 45.9, 27.7, 18.2, 12.2, 11.8.

**HRMS (ESI $^+$ )** calcd for  $\text{C}_{17}\text{H}_{37}\text{OSi}^+$   $[\text{M}+\text{H}]^+$ : 285.2614, found: 285.2614.

**IR (neat,  $\text{cm}^{-1}$ ):** 2959, 2943, 2866, 1463, 1101, 1056, 970, 882, 680, 658.

**(*E*)-Triisopropyl((5-phenylpent-2-en-1-yl)oxy)silane (1k)**

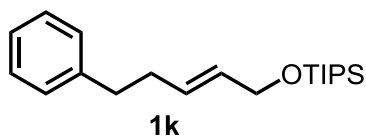

**1k** was prepared as a colorless oil in 97% yield (2.02 g, eluent: petroleum ether: ethyl acetate = 100:1) following the general procedure B.

**$R_f$**  = 0.42 (petroleum ether)

**$^1\text{H}$  NMR (400 MHz,  $\text{CDCl}_3$ )**  $\delta$  7.35 – 7.27 (m, 2H), 7.26 – 7.18 (m, 3H), 5.84 – 5.66 (m, 1H), 5.69 – 5.58 (m, 1H), 4.27 – 4.21 (m, 2H), 2.79 – 2.70 (m, 2H), 2.46 – 2.36 (m, 2H), 1.34 – 1.02 (m, 21H).

**$^{13}\text{C}$  NMR (100 MHz,  $\text{CDCl}_3$ )**  $\delta$  142.1, 130.0, 129.8, 128.6, 128.4, 125.9, 64.0, 35.9, 34.2, 18.2, 12.2.

**HRMS (ESI $^+$ )** calcd for  $\text{C}_{20}\text{H}_{35}\text{OSi}^+$   $[\text{M}+\text{H}]^+$ : 319.2457, found: 319.2454.

**IR (neat, cm<sup>-1</sup>):** 2941, 2865, 1462, 1117, 1058, 968, 882, 745, 698, 680, 658.

**(E)-Triisopropyl((6-phenylhex-2-en-1-yl)oxy)silane (1l)**<sup>[10]</sup>

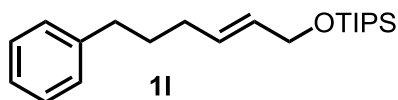

**1l** was prepared as a colorless oil in 88% yield (2.63 g, eluent: petroleum ether: ethyl acetate = 100:1) following the general procedure B.

**R<sub>f</sub>** = 0.40 (petroleum ether)

**<sup>1</sup>H NMR (400 MHz, CDCl<sub>3</sub>)** δ 7.32 – 7.25 (m, 2H), 7.22 – 7.15 (m, 3H), 5.76 – 5.65 (m, 1H), 5.63 – 5.52 (m, 1H), 4.24 – 4.18 (m, 2H), 2.68 – 2.58 (m, 2H), 2.14 – 2.04 (m, 2H), 1.78 – 1.64 (m, 2H), 1.16 – 1.04 (m, 21H).

**<sup>13</sup>C NMR (100 MHz, CDCl<sub>3</sub>)** δ 142.7, 130.4, 129.9, 128.6, 128.4, 125.8, 64.1, 35.5, 31.9, 31.1, 18.2, 12.2.

**(E)-Triisopropyl((5-(4-(trifluoromethyl)phenyl)pent-2-en-1-yl)oxy)silane (1m)**

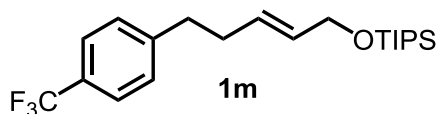

**1m** was prepared as a colorless oil in 92% yield (912 mg, eluent: petroleum ether: ethyl acetate = 100:1) following the general procedure A.

**R<sub>f</sub>** = 0.42 (petroleum ether)

**<sup>1</sup>H NMR (400 MHz, CDCl<sub>3</sub>)** δ 7.57 – 7.50 (m, 2H), 7.33 – 7.26 (m, 2H), 5.76 – 5.68 (m, 1H), 5.65 – 5.57 (m, 1H), 4.21 (d, *J* = 4.7 Hz, 2H), 2.77 (t, *J* = 7.8 Hz, 2H), 2.44 – 2.32 (m, 2H), 1.18 – 0.99 (m, 21H).

**<sup>13</sup>C NMR (100 MHz, CDCl<sub>3</sub>)** δ 146.1, 130.7, 128.9, 128.4 (q, *J* = 32.0 Hz), 125.3 (q, *J* = 3.8 Hz), 128.1, 124.6 (q, *J* = 270.0 Hz), 63.9, 35.7, 33.7, 18.1, 12.1.

**HRMS (ESI<sup>+</sup>)** calcd for C<sub>21</sub>H<sub>34</sub>OF<sub>3</sub>Si<sup>+</sup> [*M*+*H*]<sup>+</sup>: 387.2331, found: 387.2336.

**IR (neat, cm<sup>-1</sup>):** 1324, 1164, 1124, 1067, 681.

**(E)-((5-(4-Fluorophenyl)pent-2-en-1-yl)oxy)triisopropylsilane (1n)**

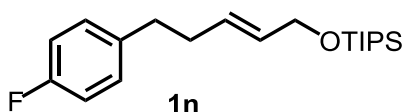

**1n** was prepared as colorless oil in 94% yield (1.33 g, eluent: petroleum ether: ethyl acetate = 100:1) following the general procedure C.

$R_f$  = 0.45 (petroleum ether)

$^1\text{H}$  NMR (400 MHz,  $\text{CDCl}_3$ )  $\delta$  7.18 – 7.09 (m, 2H), 7.00 – 6.91 (m, 2H), 5.78 – 5.65 (m, 1H), 5.64 – 5.53 (m, 1H), 4.27 – 4.12 (m, 2H), 2.68 (t,  $J$  = 7.8 Hz, 2H), 2.41 – 2.30 (m, 2H), 1.19 – 1.00 (m, 21H).

$^{13}\text{C}$  NMR (100 MHz,  $\text{CDCl}_3$ )  $\delta$  161.4 (d,  $J$  = 243.2 Hz), 137.6 (d,  $J$  = 3.3 Hz), 130.3, 129.9 (d,  $J$  = 7.8 Hz), 129.5, 115.1 (d,  $J$  = 21.0 Hz), 64.0, 35.0, 34.2, 18.2, 12.2.

HRMS (ESI $^+$ ) calcd for  $\text{C}_{20}\text{H}_{34}\text{OFSi}^+$   $[\text{M}+\text{H}]^+$ : 337.2363, found: 337.2366.

IR (neat,  $\text{cm}^{-1}$ ): 2865, 1222, 1117, 1098, 1053, 969, 882, 824, 680, 658.

**(E)-Triisopropyl((1-phenylhex-2-en-1-yl)oxy)silane (1o)**

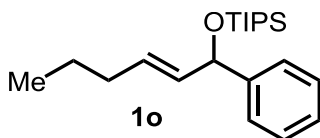

**1o** was prepared as a colorless oil in 98% yield (2.80 g, eluent: petroleum ether: ethyl acetate = 100:1) following the general procedure E.

$R_f$  = 0.85 (petroleum ether)

$^1\text{H}$  NMR (400 MHz,  $\text{CDCl}_3$ )  $\delta$  7.47 – 7.41 (m, 2H), 7.40 – 7.33 (m, 2H), 7.31 – 7.24 (m, 1H), 5.81 – 5.69 (m, 1H), 5.68 – 5.58 (m, 1H), 5.31 (d,  $J$  = 6.4 Hz, 1H), 2.12 – 2.02 (m, 2H), 1.55 – 1.41 (m, 2H), 1.31 – 1.06 (m, 21H), 0.97 (t,  $J$  = 7.5 Hz, 3H).

$^{13}\text{C}$  NMR (100 MHz,  $\text{CDCl}_3$ )  $\delta$  145.2, 134.7, 129.9, 128.2, 126.9, 126.0, 76.2, 34.4, 22.6, 18.22, 13.8, 12.5.

HRMS (ESI $^+$ ) calcd for  $\text{C}_{21}\text{H}_{37}\text{OSi}^+$   $[\text{M}+\text{H}]^+$ : 333.2614, found: 333.2619.

IR (neat,  $\text{cm}^{-1}$ ): 2943, 2866, 1102, 1056, 964, 882, 697, 680, 659.

**(E)-((1-(4-Fluorophenyl)hex-2-en-1-yl)oxy)triisopropylsilane (1p)**

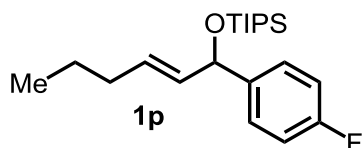

**1p** was prepared as a colorless oil in 88% yield (2.16 g, eluent: petroleum ether) following the general procedure E.

$R_f$  = 0.82 (petroleum ether)

$^1\text{H}$  NMR (400 MHz,  $\text{CDCl}_3$ )  $\delta$  7.35 – 7.26 (m, 2H), 7.04 – 6.93 (m, 2H), 5.70 – 5.58 (m, 1H), 5.56 – 5.45 (m, 1H), 5.19 (d,  $J$  = 6.5 Hz, 1H), 2.05 – 1.91 (m, 2H), 1.44 – 1.33 (m, 2H), 1.14 – 0.97 (m, 21H), 0.88 (t,  $J$  = 7.4 Hz, 3H).

$^{13}\text{C}$  NMR (100 MHz,  $\text{CDCl}_3$ )  $\delta$  161.9 (d,  $J$  = 244.1 Hz), 141.0 (d,  $J$  = 3.0 Hz), 134.4, 130.1, 127.5 (d,  $J$  = 8.0 Hz), 115.0 (d,  $J$  = 21.3 Hz), 75.5, 34.3, 22.5, 18.2, 13.8, 12.5.

HRMS (ESI $^+$ ) calcd for  $\text{C}_{21}\text{H}_{36}\text{FOSi}^+$   $[\text{M}+\text{H}]^+$ : 351.2519, found: 351.2524.

IR (neat,  $\text{cm}^{-1}$ ): 2959, 2944, 2867, 1508, 1222, 1107, 1091, 1058, 966, 882, 832, 681.

**(E)-Triisopropyl((1-(4-(trifluoromethyl)phenyl)hex-2-en-1-yl)oxy)silane (1q)**

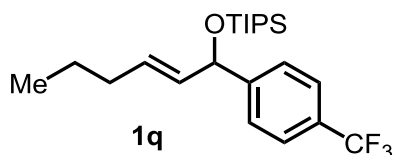

**1q** was prepared as a colorless oil in 95% yield (2.20 g, eluent: petroleum ether: ethyl acetate = 100:1) following the general procedure E.

$R_f$  = 0.87 (petroleum ether)

$^1\text{H}$  NMR (400 MHz,  $\text{CDCl}_3$ )  $\delta$  7.63 – 7.55 (m, 2H), 7.54 – 7.46 (m, 2H), 5.80 – 5.66 (m, 1H), 5.58 – 5.47 (m, 1H), 5.29 (d,  $J$  = 6.9 Hz, 1H), 2.10 – 1.94 (m, 2H), 1.48 – 1.34 (m, 2H), 1.23 – 1.01 (m, 21H), 0.90 (t,  $J$  = 7.5 Hz, 3H).

$^{13}\text{C}$  NMR (100 MHz,  $\text{CDCl}_3$ )  $\delta$  149.2, 133.9, 131.0, 129.2 (q,  $J$  = 32.1 Hz), 126.2, 124.5 (q,  $J$  = 270.0 Hz), 125.2 (q,  $J$  = 3.9 Hz), 75.7, 34.3, 22.5, 18.2, 13.8, 12.5.

HRMS (ESI $^+$ ) calcd for  $\text{C}_{22}\text{H}_{36}\text{F}_3\text{OSi}^+$   $[\text{M}+\text{H}]^+$ : 401.2488, found: 401.2488.

IR (neat,  $\text{cm}^{-1}$ ): 1323, 1164, 1125, 1100, 1066, 1017, 882, 681.

**(E)-Triisopropyl((1-(4-methoxyphenyl)hex-2-en-1-yl)oxy)silane (1r)**

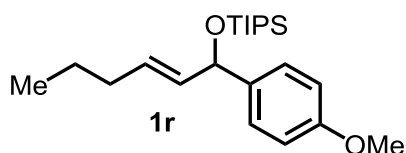

**1r** was prepared as a colorless oil in 92% yield (1.67 g, eluent: petroleum ether: ethyl acetate = 100:1) following the general procedure E.

$R_f$  = 0.79 (petroleum ether)

$^1\text{H}$  NMR (400 MHz,  $\text{CDCl}_3$ )  $\delta$  7.34 – 7.24 (m, 2H), 6.91 – 6.83 (m, 2H), 5.71 – 5.59 (m, 1H), 5.60 – 5.49 (m, 1H), 5.20 (d,  $J$  = 6.4 Hz, 1H), 3.81 (s, 3H), 2.07 – 1.93 (m, 2H), 1.47 – 1.35 (m, 2H), 1.18 – 1.00 (m, 21H), 0.90 (t,  $J$  = 7.5 Hz, 3H).

$^{13}\text{C}$  NMR (100 MHz,  $\text{CDCl}_3$ )  $\delta$  158.6, 137.5, 134.8, 129.6, 127.1, 113.6, 75.6, 55.3, 34.3, 22.6, 18.2, 13.8, 12.5.

HRMS (ESI $^+$ ) calcd for  $\text{C}_{22}\text{H}_{39}\text{O}_2\text{Si}^+$   $[\text{M}+\text{H}]^+$ : 363.2719, found: 363.2721.

IR (neat,  $\text{cm}^{-1}$ ): 2943, 2866, 1510, 1464, 1246, 1099, 1039, 965, 882, 843, 680.

**(E)-Triisopropyl(4-(1-((triisopropylsilyl)oxy)hex-2-en-1-yl)phenoxy)silane (1s)**

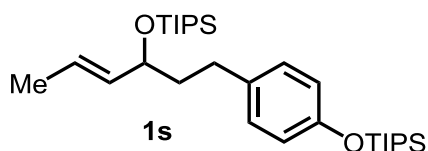

**1s** was prepared as a colorless oil in 73% yield (3.68 g, eluent: petroleum ether) following the general procedure E.

$R_f$  = 0.58 (petroleum ether)

$^1\text{H}$  NMR (400 MHz,  $\text{CDCl}_3$ )  $\delta$  7.23 – 7.13 (m, 2H), 6.87 – 6.77 (m, 2H), 5.66 – 5.48 (m, 2H), 5.14 (d,  $J$  = 5.7 Hz, 1H), 2.05 – 1.93 (m, 2H), 1.45 – 1.32 (m, 2H), 1.32 – 1.19 (m, 3H), 1.16 – 0.94 (m, 39H), 0.87 (t,  $J$  = 7.4 Hz, 3H).

$^{13}\text{C}$  NMR (100 MHz,  $\text{CDCl}_3$ )  $\delta$  154.9, 137.8, 134.7, 129.5, 127.1, 119.6, 75.6, 34.3, 22.6, 18.2, 18.0, 13.8, 12.8, 12.4.

HRMS (ESI $^+$ ) calcd for  $\text{C}_{30}\text{H}_{57}\text{O}_2\text{Si}_2^+$   $[\text{M}+\text{H}]^+$ : 505.3897, found: 505.3899.

IR (neat,  $\text{cm}^{-1}$ ): 2944, 2867, 1508, 1464, 1262, 1058, 1012, 913, 882, 680, 659.

**(E)-Triisopropyl((1-(p-tolyl)hex-2-en-1-yl)oxy)silane (1t)**

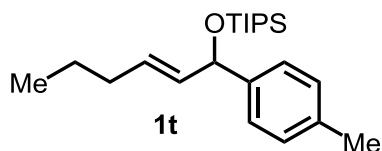

**1t** was prepared as a colorless oil in 91% yield (1.77 g, eluent: petroleum ether) following the general procedure E.

$R_f$  = 0.78 (petroleum ether)

$^1\text{H}$  NMR (400 MHz,  $\text{CDCl}_3$ )  $\delta$  7.37 – 7.31 (m, 2H), 7.23 – 7.17 (m, 2H), 5.81 – 5.69 (m, 1H), 5.69 – 5.59 (m, 1H), 5.29 (d,  $J$  = 6.5 Hz, 1H), 2.41 (s, 3H), 2.12 – 2.03 (m, 2H), 1.58 – 1.43 (m, 2H), 1.28 – 1.07 (m, 21H), 0.98 (t,  $J$  = 7.5 Hz, 3H).

$^{13}\text{C}$  NMR (100 MHz,  $\text{CDCl}_3$ )  $\delta$  142.3, 136.3, 134.8, 129.6, 128.9, 125.9, 76.0, 34.4, 22.6, 21.2, 18.2, 13.8, 12.5.

HRMS (ESI $^+$ ) calcd for  $\text{C}_{22}\text{H}_{39}\text{OSi}^+$   $[\text{M}+\text{H}]^+$ : 347.2770, found: 347.2771.

IR (neat,  $\text{cm}^{-1}$ ): 2959, 2943, 2892, 2866, 1464, 1101, 1058, 965, 882, 681, 659.

**(E)-Triisopropyl((1-(4-isopropylphenyl)hex-2-en-1-yl)oxy)silane (1u)**

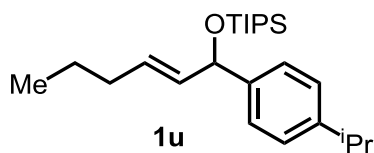

**1u** was prepared as a colorless oil in 7% yield (126 mg, eluent: petroleum ether) following the general procedure E.

$R_f$  = 0.75 (petroleum ether)

$^1\text{H}$  NMR (400 MHz,  $\text{CDCl}_3$ )  $\delta$  7.37 – 7.29 (m, 2H), 7.27 – 7.16 (m, 2H), 5.78 – 5.66 (m, 1H), 5.66 – 5.53 (m, 1H), 5.25 (d,  $J$  = 6.7 Hz, 1H), 3.01 – 2.86 (m, 1H), 2.09 – 1.97 (m, 2H), 1.52 – 1.39 (m, 2H), 1.30 (d,  $J$  = 6.9 Hz, 6H), 1.21 – 1.02 (m, 21H), 0.95 (t,  $J$  = 7.4 Hz, 3H).

$^{13}\text{C}$  NMR (100 MHz,  $\text{CDCl}_3$ )  $\delta$  147.3, 142.5, 134.7, 129.8, 126.2, 125.9, 76.0, 34.4, 33.9, 24.2, 22.6, 18.2, 13.9, 12.5.

HRMS (ESI $^+$ ) calcd for  $\text{C}_{24}\text{H}_{43}\text{OSi}^+$   $[\text{M}+\text{H}]^+$ : 375.3083, found: 375.3085.

IR (neat,  $\text{cm}^{-1}$ ): 2959, 2944, 2892, 2866, 1463, 1100, 1055, 1015, 997, 985, 965, 883, 843, 681, 660.

**(E)-((1-(4-(Tert-butyl)phenyl)hex-2-en-1-yl)oxy)triisopropylsilane (1v)**

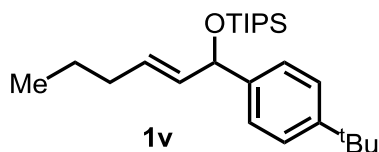

**1v** was prepared as a colorless oil in 67% yield (1.68 g, eluent: petroleum ether) following the general procedure E.

**R<sub>f</sub>** = 0.73 (petroleum ether)

**<sup>1</sup>H NMR (400 MHz, CDCl<sub>3</sub>)** δ 7.40 – 7.29 (m, 4H), 5.78 – 5.66 (m, 1H), 5.64 – 5.53 (m, 1H), 5.25 (d, *J* = 6.8 Hz, 1H), 2.08 – 2.00 (m, 2H), 1.49 – 1.40 (m, 2H), 1.35 (s, 9H), 1.18 – 1.04 (m, 21H), 0.94 (t, *J* = 7.3 Hz, 3H).

**<sup>13</sup>C NMR (100 MHz, CDCl<sub>3</sub>)** δ 149.6, 142.1, 134.7, 129.9, 125.7, 125.0, 76.0, 34.6, 34.4, 31.6, 22.6, 18.3, 13.9, 12.6.

**HRMS (ESI<sup>+</sup>)** calcd for C<sub>25</sub>H<sub>45</sub>OSi<sup>+</sup> [M+H]<sup>+</sup>: 389.3240, found: 389.3246.

**IR (neat, cm<sup>-1</sup>):** 2959, 2866, 1463, 1102, 1058, 965, 882, 834, 680, 658, 578.

**(E)-((1-([1,1'-Biphenyl]-4-yl)hex-2-en-1-yl)oxy)triisopropylsilane (1w)**

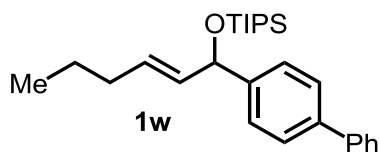

**1w** was prepared as a colorless oil in 92% yield (6.08 g, eluent: petroleum ether) following the general procedure E.

**R<sub>f</sub>** = 0.66 (petroleum ether)

**<sup>1</sup>H NMR (400 MHz, CDCl<sub>3</sub>)** δ 7.66 – 7.56 (m, 5H), 7.48 – 7.42 (m, 3H), 7.38 – 7.32 (m, 1H), 5.79 – 5.70 (m, 1H), 5.65 – 5.58 (m, 1H), 5.31 (d, *J* = 6.5 Hz, 1H), 2.11 – 1.97 (m, 2H), 1.50 – 1.38 (m, 2H), 1.19 – 1.05 (m, 21H), 0.94 (t, *J* = 7.4 Hz, 3H).

**<sup>13</sup>C NMR (100 MHz, CDCl<sub>3</sub>)** δ 144.3, 141.3, 139.7, 134.5, 130.1, 128.9, 128.8, 127.2, 127.0, 126.4, 75.9, 34.4, 22.5, 18.2, 13.9, 12.5.

**HRMS (ESI<sup>+</sup>)** calcd for C<sub>27</sub>H<sub>41</sub>OSi<sup>+</sup> [M+H]<sup>+</sup>: 409.2927, found: 409.2921.

**IR (neat, cm<sup>-1</sup>):** 2958, 2943, 2865, 1486, 1464, 1100, 1058, 1008, 966, 882, 761, 696, 681.

**(E)-((1-(4-(1,3-Dioxolan-2-yl)phenyl)hex-2-en-1-yl)oxy)triisopropylsilane (1x)**

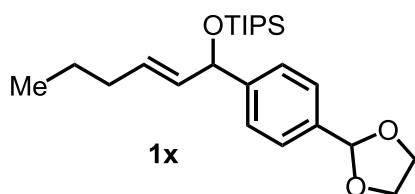

**1x** was prepared as a colorless oil in 65% yield (2.63 g, eluent: petroleum ether: ethyl acetate = 50:1) following the general procedure E.

$R_f$  = 0.20 (petroleum ether: ethyl acetate = 10:1)

$^1\text{H}$  NMR (400 MHz,  $\text{CDCl}_3$ )  $\delta$  7.46 – 7.40 (m, 2H), 7.44 – 7.29 (m, 2H), 5.80 (s, 1H), 5.72 – 5.59 (m, 1H), 5.56 – 5.46 (m, 1H), 5.23 (d,  $J$  = 6.6 Hz, 1H), 4.20 – 4.07 (m, 2H), 4.11 – 3.97 (m, 2H), 2.02 – 1.93 (m, 2H), 1.48 – 1.23 (m, 2H), 1.15 – 0.98 (m, 21H), 0.88 (t,  $J$  = 7.4 Hz, 3H).

$^{13}\text{C}$  NMR (100 MHz,  $\text{CDCl}_3$ )  $\delta$  146.6, 136.5, 134.7, 130.3, 126.6, 126.3, 104.2, 76.1, 65.7, 34.6, 22.7, 18.4, 18.1, 14.1, 12.7.

HRMS (ESI $^+$ ) calcd for  $\text{C}_{24}\text{H}_{41}\text{O}_3\text{Si}^+$   $[\text{M}+\text{H}]^+$ : 405.2825, found: 405.2826.

IR (neat,  $\text{cm}^{-1}$ ): 2958, 2942, 2866, 1699, 1604, 1464, 1209., 1015, 968, 882, 810, 679.

**(E)-((1-(3,5-Dimethoxyphenyl)hex-2-en-1-yl)oxy)triisopropylsilane (1y)**

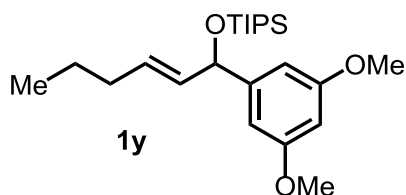

**1y** was prepared as a colorless oil in 54% yield (994 mg, eluent: petroleum ether) following the general procedure E.

$R_f$  = 0.35 (petroleum ether)

$^1\text{H}$  NMR (400 MHz,  $\text{CDCl}_3$ )  $\delta$  6.61 – 6.53 (m, 2H), 6.37 – 6.31 (m, 1H), 5.74 – 5.62 (m, 1H), 5.60 – 5.49 (m, 1H), 5.16 (d,  $J$  = 6.7 Hz, 1H), 3.79 (s, 6H), 2.05 – 1.95 (m, 2H), 1.48 – 1.34 (m, 2H), 1.19 – 0.99 (m, 21H), 0.90 (t,  $J$  = 7.4 Hz, 3H).

$^{13}\text{C}$  NMR (100 MHz,  $\text{CDCl}_3$ )  $\delta$  160.6, 147.7, 134.1, 130.1, 103.8, 98.8, 75.9, 55.2, 34.2, 22.4, 18.1, 13.7, 12.4.

HRMS (ESI $^+$ ) calcd for  $\text{C}_{23}\text{H}_{41}\text{O}_3\text{Si}^+$   $[\text{M}+\text{H}]^+$ : 393.2825, found: 393.2826.

IR (neat,  $\text{cm}^{-1}$ ): 2866, 1597, 1463, 1204, 1154, 1064, 882, 681.



**(E)-((1-(3,5-Di-tert-butylphenyl)hex-2-en-1-yl)oxy)triisopropylsilane (1z)**

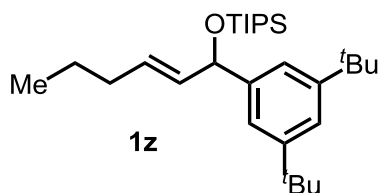

**1z** was prepared as a colorless oil in 87% yield (2.33 g, eluent: petroleum ether) following the general procedure E.

$R_f$  = 0.64 (petroleum ether)

$^1\text{H}$  NMR (400 MHz,  $\text{CDCl}_3$ )  $\delta$  7.38 – 7.32 (m, 1H), 7.33 – 7.28 (m, 2H), 5.83 – 5.71 (m, 1H), 5.71 – 5.61 (m, 1H), 5.28 (d,  $J$  = 6.6 Hz, 1H), 2.16 – 2.02 (m, 2H), 1.54 – 1.43 (m, 2H), 1.40 (s, 18H), 1.25 – 1.06 (m, 21H), 0.98 (t,  $J$  = 7.5 Hz, 3H).

$^{13}\text{C}$  NMR (100 MHz,  $\text{CDCl}_3$ )  $\delta$  150.3, 144.1, 134.8, 129.9, 120.6, 120.5, 76.6, 35.0, 34.4, 31.7, 22.6, 18.3, 13.9, 12.6.

HRMS (ESI $^+$ ) calcd for  $\text{C}_{29}\text{H}_{53}\text{OSi}^+$   $[\text{M}+\text{H}]^+$ : 445.3866, found: 445.3861.

IR (neat,  $\text{cm}^{-1}$ ): 2958, 2866, 1464, 1362, 1104, 1060, 965, 881, 714, 680, 656.

**(E)-((1-(3,5-Bis(trifluoromethyl)phenyl)hex-2-en-1-yl)oxy)triisopropylsilane (1aa)**

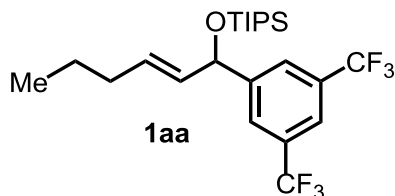

**1aa** was prepared as a colorless oil in 40% yield (1.04 g, eluent: petroleum ether) following the general procedure E.

$R_f$  = 0.87 (petroleum ether)

$^1\text{H}$  NMR (400 MHz,  $\text{CDCl}_3$ )  $\delta$  7.88 – 7.83 (m, 2H), 7.77 – 7.73 (m, 1H), 5.84 – 5.72 (m, 1H), 5.56 – 5.45 (m, 1H), 5.34 (d,  $J$  = 7.2 Hz, 1H), 2.13 – 1.94 (m, 2H), 1.51 – 1.34 (m, 2H), 1.22 – 1.00 (m, 21H), 0.90 (t,  $J$  = 7.4 Hz, 3H).

$^{13}\text{C}$  NMR (100 MHz,  $\text{CDCl}_3$ )  $\delta$  147.9, 133.1, 132.3, 131.5 (q,  $J$  = 33.1 Hz), 126.2 (q,  $J$  = 4.0 Hz), 123.7 (q,  $J$  = 270.0 Hz), 120.9 (m), 75.3, 34.3, 22.4, 18.1, 18.0, 13.7, 12.4.

HRMS (ESI $^+$ ) calcd for  $\text{C}_{23}\text{H}_{35}\text{OF}_6\text{Si}^+$   $[\text{M}+\text{H}]^+$ : 469.2361, found: 469.2361.

IR (neat,  $\text{cm}^{-1}$ ): 1276, 1170, 1131, 882, 682.

**(E)-Triisopropyl((1-(naphthalen-2-yl)hex-2-en-1-yl)oxy)silane (1ab)**

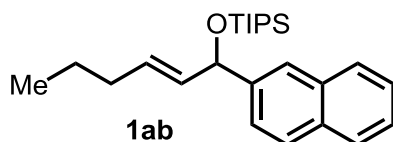

**1ab** was prepared as a colorless oil in 70% yield (1.28 g, eluent: petroleum ether) following the general procedure E.

$R_f$  = 0.68 (petroleum ether)

$^1\text{H}$  NMR (400 MHz,  $\text{CDCl}_3$ )  $\delta$  7.90 – 7.80 (m, 4H), 7.57 – 7.42 (m, 3H), 5.83 – 5.71 (m, 1H), 5.70 – 5.60 (m, 1H), 5.46 – 5.40 (m, 1H), 2.11 – 1.99 (m, 2H), 1.49 – 1.38 (m, 2H), 1.24 – 1.04 (m, 21H), 0.93 (t,  $J$  = 7.4 Hz, 3H).

$^{13}\text{C}$  NMR (100 MHz,  $\text{CDCl}_3$ )  $\delta$  142.7, 134.5, 133.5, 132.9, 130.2, 128.1, 127.9, 127.8, 125.9, 125.5, 124.9, 124.2, 76.2, 34.4, 22.5, 18.2, 13.8, 12.5.

HRMS (ESI $^+$ ) calcd for  $\text{C}_{25}\text{H}_{39}\text{OSi}^+$   $[\text{M}+\text{H}]^+$ : 383.2770, found: 383.2773.

IR (neat,  $\text{cm}^{-1}$ ): 2943, 2865, 1463, 1102, 1057, 882, 856, 743, 680, 656, 477.

**(E)-(Hept-3-en-2-yloxy)triisopropylsilane (1ac)**

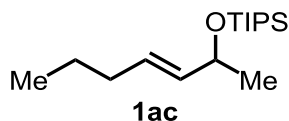

**1ac** was prepared as a colorless oil in 95% yield (2.38 g, eluent: petroleum ether) following the general procedure D.

$R_f$  = 0.77 (petroleum ether)

$^1\text{H}$  NMR (400 MHz,  $\text{CDCl}_3$ )  $\delta$  5.60 – 5.41 (m, 2H), 4.38 – 4.28 (m, 1H), 2.06 – 1.91 (m, 2H), 1.45 – 1.31 (m, 2H), 1.22 (d,  $J$  = 6.3 Hz, 3H), 1.15 – 0.98 (m, 21H), 0.89 (t,  $J$  = 7.4 Hz, 3H).

$^{13}\text{C}$  NMR (100 MHz,  $\text{CDCl}_3$ )  $\delta$  135.5, 128.9, 69.6, 34.4, 25.3, 22.6, 18.2, 13.8, 12.5.

HRMS (ESI $^+$ ) calcd for  $\text{C}_{16}\text{H}_{35}\text{OSi}^+$   $[\text{M}+\text{H}]^+$ : 271.2457, found: 271.2449.

IR (neat,  $\text{cm}^{-1}$ ): 2960, 2943, 2866, 1464, 1088, 1065, 1000, 966, 882, 677, 656.

**(E)-Triisopropyl(oct-4-en-3-yloxy)silane (1ad)**

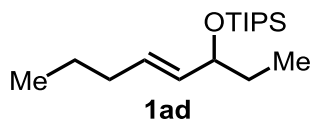

**1ad** was prepared as a colorless oil in 93% yield (1.58 g, eluent: petroleum ether) following the general procedure D.

$R_f$  = 0.67 (petroleum ether)

$^1\text{H}$  NMR (400 MHz,  $\text{CDCl}_3$ )  $\delta$  5.58 – 5.46 (m, 1H), 5.44 – 5.34 (m, 1H), 4.14 – 4.02 (m, 1H), 2.09 – 1.92 (m, 2H), 1.68 – 1.46 (m, 2H), 1.45 – 1.31 (m, 2H), 1.18 – 0.98 (m, 21H), 0.97 – 0.78 (m, 6H).

$^{13}\text{C}$  NMR (100 MHz,  $\text{CDCl}_3$ )  $\delta$  133.8, 130.5, 75.3, 34.5, 31.6, 22.7, 18.3, 13.8, 12.6, 9.4.

HRMS (ESI $^+$ ) calcd for  $\text{C}_{17}\text{H}_{37}\text{OSi}^+$   $[\text{M}+\text{H}]^+$ : 285.2614, found: 285.2608.

IR (neat,  $\text{cm}^{-1}$ ): 2960, 2942, 2866, 1464, 1100, 1081, 1061, 1012, 969, 882, 678, 657.

**(E)-Triisopropyl(non-5-en-4-yloxy)silane (1ae)**

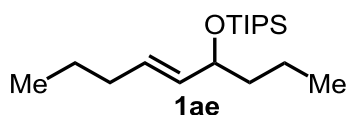

**1ae** was prepared as a colorless oil in 92% yield (2.60 g, eluent: petroleum ether) following the general procedure D.

$R_f$  = 0.73 (petroleum ether)

$^1\text{H}$  NMR (400 MHz,  $\text{CDCl}_3$ )  $\delta$  5.57 – 5.46 (m, 1H), 5.45 – 5.35 (m, 1H), 4.19 – 4.10 (m, 1H), 2.07 – 1.92 (m, 2H), 1.63 – 1.50 (m, 1H), 1.49 – 1.26 (m, 5H), 1.14 – 1.00 (m, 21H), 0.90 (t,  $J$  = 7.5 Hz, 6H).

$^{13}\text{C}$  NMR (100 MHz,  $\text{CDCl}_3$ )  $\delta$  134.2, 130.3, 74.0, 41.3, 34.5, 22.6, 18.4, 18.3, 14.4, 13.8, 12.6.

HRMS (ESI $^+$ ) calcd for  $\text{C}_{18}\text{H}_{39}\text{OSi}^+$   $[\text{M}+\text{H}]^+$ : 299.2770, found: 299.2767.

IR (neat,  $\text{cm}^{-1}$ ): 2958, 2931, 2866, 1464, 1100, 1082, 1062, 1039, 968, 882, 677, 656.

**(E)-(Dec-6-en-5-yloxy)triisopropylsilane (1af)**

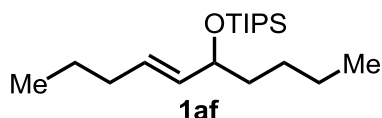

**1af** was prepared as a colorless oil in 85% yield (1.48 g, eluent: petroleum ether) following the general procedure D.

$R_f$  = 0.63 (petroleum ether)

$^1\text{H}$  NMR (400 MHz,  $\text{CDCl}_3$ )  $\delta$  5.56 – 5.45 (m, 1H), 5.44 – 5.34 (m, 1H), 4.20 – 4.03 (m, 1H), 2.08 – 1.91 (m, 2H), 1.65 – 1.52 (m, 1H), 1.51 – 1.35 (m, 3H), 1.34 – 1.21 (m, 4H), 1.15 – 0.97 (m, 21H), 0.94 – 0.81 (m, 6H).

$^{13}\text{C}$  NMR (100 MHz,  $\text{CDCl}_3$ )  $\delta$  134.2, 130.3, 74.2, 38.7, 34.5, 27.4, 23.0, 22.6, 18.3, 14.3, 13.9, 12.6.

HRMS (APCI<sup>+</sup>) calcd for  $\text{C}_{19}\text{H}_{41}\text{OSi}^+$   $[\text{M}+\text{H}]^+$ : 313.2927, found: 313.2922.

IR (neat,  $\text{cm}^{-1}$ ): 2958, 2930, 2865, 1464, 1102, 1084, 1056, 969, 882, 677, 656.

**(E)-Triisopropyl((1-phenylhex-4-en-3-yl)oxy)silane (1ag)**

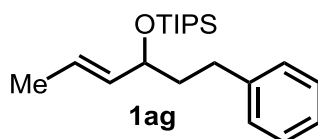

**1ag** was prepared as a colorless oil in 72% yield (920 mg, eluent: petroleum ether) following the general procedure E.

$R_f$  = 0.82 (petroleum ether)

$^1\text{H}$  NMR (400 MHz,  $\text{CDCl}_3$ )  $\delta$  7.37 – 7.26 (m, 2H), 7.28 – 7.16 (m, 3H), 5.59 – 5.43 (m, 2H), 4.71 – 4.61 (m, 1H), 2.78 – 2.61 (m, 2H), 2.03 – 1.76 (m, 2H), 1.65 (d,  $J$  = 5.2 Hz, 3H), 1.17 – 1.03 (m, 21H).

$^{13}\text{C}$  NMR (100 MHz,  $\text{CDCl}_3$ )  $\delta$  142.8, 135.0, 128.5, 128.4, 125.7, 123.4, 68.2, 40.7, 31.4, 18.2, 13.7, 12.5.

HRMS (ESI<sup>+</sup>) calcd for  $\text{C}_{21}\text{H}_{37}\text{OSi}^+$   $[\text{M}+\text{H}]^+$ : 333.2614, found: 333.2611.

IR (neat,  $\text{cm}^{-1}$ ): 2943, 2866, 1463, 1089, 1064, 882, 717, 698, 680, 658.

**(E)-3,3,12,12-Tetraisopropyl-2,13-dimethyl-5-(prop-1-en-1-yl)-4,11-dioxa-3,12-disilatetradecane (1ah)**

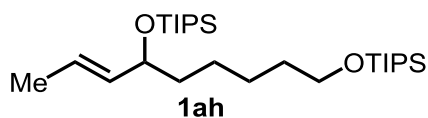

**1ah** was prepared as a colorless oil in 64% yield (827 mg, eluent: petroleum ether)

following general procedure B and the general procedure F.

$R_f = 0.84$  (petroleum ether)

$^1\text{H NMR}$  (400 MHz,  $\text{CDCl}_3$ )  $\delta$  5.49 – 5.33 (m, 2H), 4.58 – 4.49 (m, 1H), 3.66 (t,  $J = 6.6$  Hz, 2H), 1.69 – 1.50 (m, 7H), 1.39 – 1.25 (m, 4H), 1.05 (d,  $J = 4.8$  Hz, 42H).

$^{13}\text{C NMR}$  (100 MHz,  $\text{CDCl}_3$ )  $\delta$  135.5, 122.8, 68.5, 63.6, 39.0, 33.2, 26.2, 24.9, 18.2, 18.1, 13.6, 12.5, 12.2.

HRMS (ESI $^+$ ) calcd for  $\text{C}_{27}\text{H}_{59}\text{O}_2\text{Si}^+$   $[\text{M}+\text{H}]^+$ : 471.4054, found: 471.4049.

IR (neat,  $\text{cm}^{-1}$ ): 2941, 2893, 2866, 1463, 1100, 1066, 882, 679, 657.

#### (*E*)-((9-Chloronon-2-en-4-yl)oxy)triisopropylsilane (**1ai**)

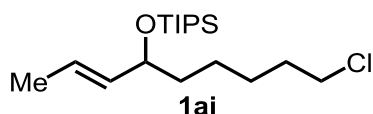

**1ai** was prepared as a colorless oil in 43% yield (419 mg, eluent: petroleum ether) following the general procedure F.

$R_f = 0.73$  (petroleum ether)

$^1\text{H NMR}$  (400 MHz,  $\text{CDCl}_3$ )  $\delta$  5.48 – 5.33 (m, 2H), 4.60 – 4.48 (m, 1H), 3.52 (t,  $J = 6.7$  Hz, 2H), 1.83 – 1.73 (m, 2H), 1.63 – 1.55 (m, 4H), 1.51 – 1.39 (m, 3H), 1.38 – 1.29 (m, 2H), 1.11 – 1.00 (m, 21H).

$^{13}\text{C NMR}$  (100 MHz,  $\text{CDCl}_3$ )  $\delta$  135.3, 123.0, 68.4, 45.2, 38.7, 32.8, 27.2, 24.3, 18.2, 13.6, 12.5.

HRMS (ESI $^+$ ) calcd for  $\text{C}_{18}\text{H}_{38}\text{ClOSi}^+$   $[\text{M}+\text{H}]^+$ : 333.2380, found: 333.2373.

IR (neat,  $\text{cm}^{-1}$ ): 2941, 2866, 1090, 1065, 883, 681.

#### (*E*)-Triethyl((2-methyldec-3-en-2-yl)oxy)silane (**1aj**)

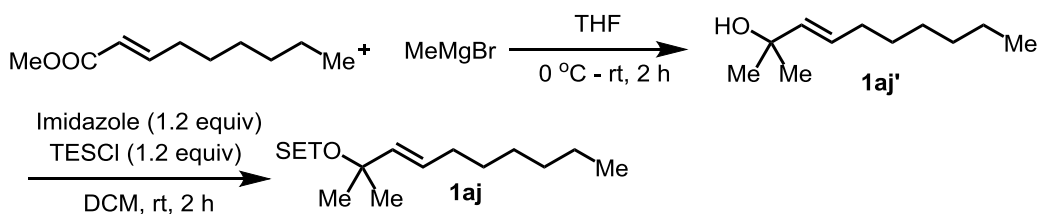

A dried round-bottom flask containing stir bar was charged with methyl trans-2-nonenoate (1.70 g, 10.0 mmol) and the solvent THF under nitrogen

atmosphere. The solution was cooled to  $-78\text{ }^{\circ}\text{C}$  and MeMgBr (3 equiv, 3 M solution in Et<sub>2</sub>O) was added dropwise. The flask was then sealed and heated to  $60\text{ }^{\circ}\text{C}$  in an oil bath for 3 hours. The reaction was then poured into an ice/water mixture and extracted three times with 50 mL of ethyl acetate. The combined organic phases were washed with brine, dried over MgSO<sub>4</sub>, filtered and concentrated. The residue was purified by silica gel column chromatography (petroleum ether/ethyl acetate = 20/1) to afford **1aj'** (1.34 g, 79%) as colorless oil.

Following the literature procedure<sup>[3]</sup>, a flask was charged with allylic alcohol and imidazole (1.2 equiv). The contents were then dissolved in DCM and chlorotriethylsilane (TESCl) (1.2 equiv) was added dropwise at room temperature over 2 h. After complete conversion (TLC analysis), water was added and the organic layer was separated. The aqueous phase was extracted with ethyl acetate, washed with brine, dried over MgSO<sub>4</sub>, filtered, concentrated, the residue purified by column chromatography to afford silicon-protected allyl alcohol **1aj**.

**1aj** was prepared as a colorless oil in 89% yield (1.08 g, eluent: petroleum ether)

$R_f = 0.69$  (petroleum ether)

<sup>1</sup>H NMR (400 MHz, CDCl<sub>3</sub>)  $\delta$  5.57 – 5.51 (m, 2H), 2.03 – 1.96 (m, 2H), 1.42 – 1.22 (m, 15H), 1.01 – 0.83 (m, 11H), 0.62 – 0.52 (m, 6H).

<sup>13</sup>C NMR (100 MHz, CDCl<sub>3</sub>)  $\delta$  138.6, 126.7, 72.8, 32.3, 31.8, 30.6, 29.3, 28.9, 22.6, 14.0, 7.0, 6.7.

HRMS (ESI<sup>+</sup>) calcd for C<sub>17</sub>H<sub>37</sub>OSi<sup>+</sup> [M+H]<sup>+</sup>: 285.2608, found: 285.5102.

IR (neat, cm<sup>-1</sup>): 2956, 2925, 1150, 1039, 1016, 968, 742, 723.

#### (E)-((1-Cyclohexylhex-2-en-1-yl)oxy)triethylsilane (**1ak**)

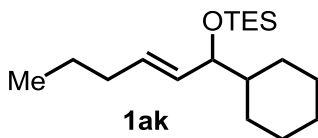

**1ak** was prepared as a colorless oil in 95% yield (744 mg, eluent: petroleum ether) following the general procedure E.

$R_f = 0.66$  (petroleum ether)

**<sup>1</sup>H NMR (400 MHz, CDCl<sub>3</sub>)** δ 5.53 – 5.41 (m, 1H), 5.42 – 5.31 (m, 1H), 3.70 (m, 1H), 2.06 – 1.92 (m, 2H), 1.91 – 1.80 (m, 1H), 1.78 – 1.59 (m, 4H), 1.45 – 1.06 (m, 6H), 1.00 – 0.85 (m, 14H), 0.63 – 0.49 (m, 6H).

**<sup>13</sup>C NMR (100 MHz, CDCl<sub>3</sub>)** δ 132.6, 131.4, 78.7, 44.7, 34.5, 29.2, 26.9, 26.5, 22.6, 13.9, 7.0, 5.2.

**HRMS (ESI<sup>+</sup>)** calcd for C<sub>18</sub>H<sub>37</sub>OSi<sup>+</sup> [M+H]<sup>+</sup>: 297.2614, found: 297.2619.

**IR (neat, cm<sup>-1</sup>):** 2954, 2924, 2875, 2853, 1092, 1051, 1005, 969, 740, 724.

**(E)-Triisopropyl((6-(*p*-tolyl)hex-2-en-1-yl)oxy)silane (1aI)**

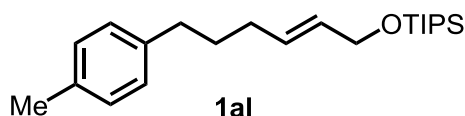

**1aI** was prepared as a colourless solid in 93% yield (1.71 g, eluent: petroleum ether: ethyl acetate = 100:1) following the general procedure C.

R<sub>f</sub> = 0.68 (petroleum ether: ethyl acetate = 20:1)

**<sup>1</sup>H NMR (400 MHz, CDCl<sub>3</sub>)** δ 7.13 – 7.04 (m, 4H), 5.76 – 5.65 (m, 1H), 5.63 – 5.53 (m, 1H), 4.24 – 4.18 (m, 2H), 2.63 – 2.55 (m, 2H), 2.33 (s, 3H), 2.14 – 2.04 (m, 2H), 1.76 – 1.62 (m, 2H), 1.19 – 1.03 (m, 21H).

**<sup>13</sup>C NMR (100 MHz, CDCl<sub>3</sub>)** δ 139.6, 135.2, 130.5, 129.88, 129.1, 128.5, 64.2, 35.1, 31.9, 31.3, 21.1, 18.2, 18.1, 12.2.

**HRMS (ESI<sup>+</sup>)** calcd for C<sub>22</sub>H<sub>38</sub>OSiNa<sup>+</sup> [M+Na]<sup>+</sup>: 369.2584, found: 369.2587.

**IR (neat, cm<sup>-1</sup>):** 2939, 2864, 1462, 1122, 1058, 1013, 968, 882, 802, 680, 658.

**(E)-((5-(3-Chlorophenyl)pent-2-en-1-yl)oxy)triisopropylsilane (1aM)**

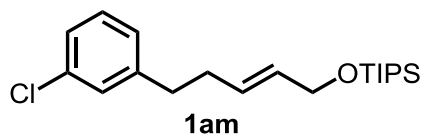

**1aM** was prepared as a colorless oil in 72% yield (1.29 g, eluent: petroleum ether: ethyl acetate = 100:1) following the general procedure C.

R<sub>f</sub> = 0.23 (petroleum ether)

**<sup>1</sup>H NMR (400 MHz, CDCl<sub>3</sub>)** δ 7.37 – 7.31 (m, 1H), 7.27 – 7.09 (m, 3H), 5.82 – 5.70 (m, 1H), 5.66 – 5.57 (m, 1H), 4.27 – 4.19 (m, 2H), 2.90 – 2.78 (m, 2H), 2.44 – 2.33 (m, 2H), 1.30 – 0.98 (m, 21H).

**<sup>13</sup>C NMR (100 MHz, CDCl<sub>3</sub>)** δ 138.6, 133.1, 129.5, 129.3, 128.5, 128.4, 126.4, 125.8, 63.0, 32.5, 31.3, 17.2, 11.2.

**(E)-((4-Ethyl-2-en-1-yl)oxy)triisopropylsilane (1an)**

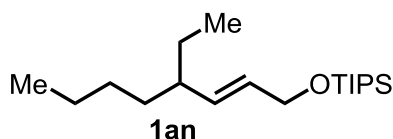

**1an** was prepared as a colorless oil in 92% yield (1.43 g, eluent: petroleum ether) following the general procedure A.

**R<sub>f</sub>** = 0.72 (petroleum ether)

**<sup>1</sup>H NMR (400 MHz, CDCl<sub>3</sub>)** δ 5.56 – 5.46 (m, 1H), 5.45 – 5.34 (m, 1H), 4.25 – 4.19 (m, 2H), 1.92 – 1.79 (m, 1H), 1.47 – 1.33 (m, 2H), 1.33 – 1.18 (m, 6H), 1.18 – 0.96 (m, 21H), 0.96 – 0.78 (m, 6H).

**<sup>13</sup>C NMR (100 MHz, CDCl<sub>3</sub>)** δ 135.2, 129.4, 64.2, 44.2, 34.8, 29.6, 28.1, 23.0, 18.2, 14.2, 12.3, 11.8.

**HRMS (ESI<sup>+</sup>)** calcd for C<sub>19</sub>H<sub>41</sub>OSi<sup>+</sup> [M+H]<sup>+</sup>: 313.2927, found: 313.2927.

**IR (neat, cm<sup>-1</sup>):** 2959, 2928, 2866, 1464, 1103, 1060, 882, 681.

**(E)-((5,5-Dimethylhex-2-en-1-yl)oxy)triisopropylsilane (1ao)**

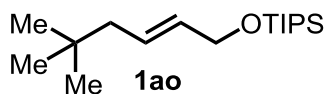

**1ao** was prepared as a colorless oil in 95% yield (1.56 g, eluent: petroleum ether) following the general procedure A.

**R<sub>f</sub>** = 0.75 (petroleum ether)

**<sup>1</sup>H NMR (400 MHz, CDCl<sub>3</sub>)** δ 5.76 – 5.66 (m, 1H), 5.59 – 5.48 (m, 1H), 4.25 – 4.19 (m, 2H), 1.96 – 1.88 (m, 2H), 1.20 – 1.00 (m, 21H), 0.88 (s, 9H).

**<sup>13</sup>C NMR (100 MHz, CDCl<sub>3</sub>)** δ 131.6, 127.8, 64.1, 46.9, 31.0, 29.4, 18.2, 12.2.

**HRMS (ESI<sup>+</sup>)** calcd for C<sub>17</sub>H<sub>37</sub>OSi<sup>+</sup> [M+H]<sup>+</sup>: 285.2614, found: 285.2608.



**IR (neat, cm<sup>-1</sup>):** 2944, 2893, 2866, 1464, 1365, 1112, 1057, 972, 882, 680, 658.

**(E)-((8-Chlorooct-2-en-1-yl)oxy)triisopropylsilane (1ap)**

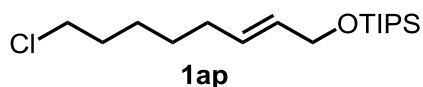

**1ap** was prepared as a colorless oil in 87% yield (1.43 g, eluent: petroleum ether) following the general procedure A.

**R<sub>f</sub>** = 0.45 (petroleum ether)

**<sup>1</sup>H NMR (400 MHz, CDCl<sub>3</sub>)** δ 5.72 – 5.61 (m, 1H), 5.59 – 5.50 (m, 1H), 4.22 – 4.16 (m, 2H), 3.52 (t, *J* = 6.7 Hz, 2H), 2.10 – 2.00 (m, 2H), 1.84 – 1.73 (m, 2H), 1.50 – 1.32 (m, 4H), 1.17 – 1.00 (m, 21H).

**<sup>13</sup>C NMR (100 MHz, CDCl<sub>3</sub>)** δ 130.5, 129.8, 64.1, 45.2, 32.6, 32.1, 28.6, 26.5, 18.2, 12.2.

**HRMS (ESI<sup>+</sup>)** calcd for C<sub>17</sub>H<sub>36</sub>ClOSi<sup>+</sup> [*M*+H]<sup>+</sup>: 319.2224, found: 319.2230.

**IR (neat, cm<sup>-1</sup>):** 2941, 2893, 2865, 1463, 1101, 1059, 1013, 969, 882, 681, 657.

**(E)-((3-Cyclopentylallyl)oxy)triisopropylsilane (1aq)**

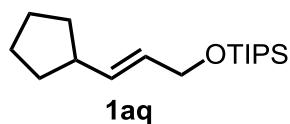

**1aq** was prepared as a colorless oil in 74% yield (1.42 g, eluent: petroleum ether) following the general procedure A.

**R<sub>f</sub>** = 0.46 (petroleum ether)

**<sup>1</sup>H NMR (400 MHz, CDCl<sub>3</sub>)** δ 5.68 – 5.61 (m, 1H), 5.58 – 5.49 (m, 1H), 4.22 – 4.16 (m, 2H), 2.49 – 2.39 (m, 1H), 1.83 – 1.71 (m, 2H), 1.69 – 1.51 (m, 4H), 1.37 – 1.22 (m, 2H), 1.20 – 0.98 (m, 21H).

**<sup>13</sup>C NMR (100 MHz, CDCl<sub>3</sub>)** δ 135.7, 127.5, 64.3, 43.2, 33.1, 25.2, 18.2, 12.2.

**HRMS (ESI<sup>+</sup>)** calcd for C<sub>17</sub>H<sub>35</sub>OSi<sup>+</sup> [*M*+H]<sup>+</sup>: 283.2457, found: 283.2456.

**IR (neat, cm<sup>-1</sup>):** 2944, 2892, 2866, 1128, 1110, 1060, 969, 882, 681.

**(E)-((3-Cyclohexylallyl)oxy)triisopropylsilane (1ar)**

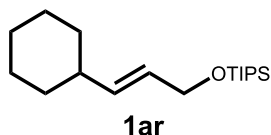

**1ar** was prepared as a colorless oil in 79% yield (1.51 g, eluent: petroleum ether) following the general procedure A.

$R_f$  = 0.63 (petroleum ether)

$^1\text{H}$  NMR (400 MHz,  $\text{CDCl}_3$ )  $\delta$  5.67 – 5.56 (m, 1H), 5.55 – 5.42 (m, 1H), 4.23 – 4.16 (m, 2H), 2.01 – 1.90 (m, 1H), 1.76 – 1.61 (m, 4H), 1.32 – 1.11 (m, 6H), 1.10 – 0.98 (m, 21H).

$^{13}\text{C}$  NMR (100 MHz,  $\text{CDCl}_3$ )  $\delta$  136.9, 126.8, 64.4, 40.4, 33.0, 26.4, 26.2, 18.2, 12.2.

HRMS (ESI<sup>+</sup>) calcd for  $\text{C}_{18}\text{H}_{37}\text{OSi}^+$   $[\text{M}+\text{H}]^+$ : 297.2614, found: 297.2608.

IR (neat,  $\text{cm}^{-1}$ ): 2924, 2865, 2852, 1463, 1115, 1099, 1059, 968, 882, 680, 657.

**(E)-Triisopropyl((6-(thiophen-2-yl)hex-2-en-1-yl)oxy)silane (1as)**

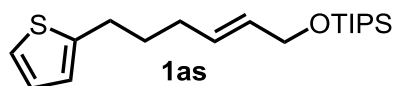

**1as** was prepared as a colorless oil in 68% yield (244 mg, eluent: petroleum ether: ethyl acetate=20:1) following the general procedure C.

$R_f$  = 0.72 (petroleum ether: ethyl acetate = 5:1)

$^1\text{H}$  NMR (400 MHz,  $\text{CDCl}_3$ )  $\delta$  7.15 – 7.09 (m, 1H), 6.97 – 6.90 (m, 1H), 6.83 – 6.77 (m, 1H), 5.78 – 5.66 (m, 1H), 5.66 – 5.55 (m, 1H), 4.26 – 4.20 (m, 2H), 2.90 – 2.82 (m, 2H), 2.19 – 2.10 (m, 2H), 1.86 – 1.74 (m, 2H), 1.23 – 1.00 (m, 21H).

$^{13}\text{C}$  NMR (100 MHz,  $\text{CDCl}_3$ )  $\delta$  145.5, 130.2, 130.0, 126.8, 124.2, 123.0, 64.1, 31.6, 31.4, 29.4, 18.2, 12.2.

HRMS (ESI<sup>+</sup>) calcd for  $\text{C}_{19}\text{H}_{35}\text{OSSi}^+$   $[\text{M}+\text{H}]^+$ : 339.2178, found: 339.2175.

IR (neat,  $\text{cm}^{-1}$ ): 2941, 2893, 2866, 1058, 882, 689.

**(Hex-5-en-1-yloxy)triisopropylsilane (1a')<sup>[4]</sup>**

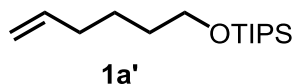

**1a'** was prepared as a colorless oil in 93% yield (1.19 g, eluent: petroleum ether) following the general procedure A.

$R_f$  = 0.84 (petroleum ether)

$^1\text{H}$  NMR (400 MHz,  $\text{CDCl}_3$ )  $\delta$  5.92 – 5.77 (m, 1H), 5.06 – 4.93 (m, 2H), 3.71 (t,  $J$  = 6.4 Hz, 2H), 2.15 – 2.03 (m, 2H), 1.63 – 1.42 (m, 4H), 1.18 – 1.01 (m, 21H).

$^{13}\text{C}$  NMR (100 MHz,  $\text{CDCl}_3$ )  $\delta$  139.2, 114.5, 63.4, 33.7, 32.6, 25.3, 18.2, 12.2.

**(E)-(Hex-3-en-1-yloxy)triisopropylsilane ((E)-1a'')**<sup>[14]</sup>

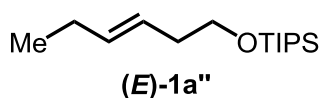

**(E)-1a''** was prepared as a colorless oil in 56% yield (736 mg, eluent: petroleum ether) following the general procedure A.

$R_f$  = 0.80 (petroleum ether)

$^1\text{H}$  NMR (400 MHz,  $\text{CDCl}_3$ )  $\delta$  5.56 – 5.48 (m, 1H), 5.46 – 5.37 (m, 1H), 3.68 (t,  $J$  = 6.9 Hz, 2H), 2.29 – 2.19 (m, 2H), 2.06 – 1.94 (m, 2H), 1.16 – 1.01 (m, 21H), 0.97 (t,  $J$  = 7.5 Hz, 3H).

$^{13}\text{C}$  NMR (100 MHz,  $\text{CDCl}_3$ )  $\delta$  134.2, 125.7, 63.8, 36.6, 25.8, 18.2, 13.9, 12.2.

**(Z)-(Hex-3-en-1-yloxy)triisopropylsilane ((Z)-1a'')**<sup>[4]</sup>

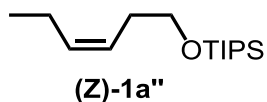

**(Z)-1a''** was prepared as a colorless oil in 92% yield (2.35 g, eluent: petroleum ether) following the general procedure A.

$R_f$  = 0.82 (petroleum ether)

$^1\text{H}$  NMR (400 MHz,  $\text{CDCl}_3$ )  $\delta$  5.51 – 5.41 (m, 1H), 5.40 – 5.29 (m, 1H), 3.67 (t,  $J$  = 7.1 Hz, 2H), 2.35 – 2.26 (m, 2H), 2.12 – 2.00 (m, 2H), 1.14 – 1.02 (m, 21H), 0.96 (t,  $J$  = 7.5 Hz, 3H).

$^{13}\text{C}$  NMR (100 MHz,  $\text{CDCl}_3$ )  $\delta$  133.5, 125.2, 63.4, 31.3, 20.8, 18.2, 14.5, 12.2.

**(E)-Triethyl(hex-2-en-1-yloxy)silane<sup>[15]</sup>**

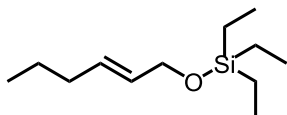

The compound was prepared as a colorless oil in 90% yield (0.96 g, eluent: petroleum ether) following the general procedure A.

$R_f$  = 0.75 (petroleum ether)

$^1\text{H}$  NMR (400 MHz,  $\text{CDCl}_3$ )  $\delta$  5.70 – 5.57 (m, 1H), 5.58 – 5.49 (m, 1H), 4.15 – 4.09 (m, 2H), 2.06 – 1.96 (m, 2H), 1.47 – 1.35 (m, 2H), 0.94 – 0.86 (m, 12H), 0.14 – 0.03 (m, 6H).

$^{13}\text{C}$  NMR (100 MHz,  $\text{CDCl}_3$ )  $\delta$  131.4, 129.4, 64.3, 34.4, 26.1, 22.5, 18.6, 13.8.

**(E)-tert-Butyl(hex-2-en-1-yloxy)dimethylsilane<sup>[16]</sup>**

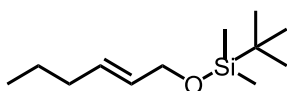

The compound was prepared as a colorless oil in 93% yield (0.99 g, eluent: petroleum ether) following the general procedure A.

$R_f$  = 0.80 (petroleum ether)

$^1\text{H}$  NMR (400 MHz,  $\text{CDCl}_3$ )  $\delta$  5.69 – 5.60 (m, 1H), 5.59 – 5.50 (m, 1H), 4.14 – 4.08 (m, 2H), 2.05 – 1.97 (m, 2H), 1.46 – 1.31 (m, 2H), 1.01 – 0.93 (m, 9H), 0.90 (t,  $J$  = 7.4 Hz, 3H), 0.66 – 0.54 (m, 6H).

$^{13}\text{C}$  NMR (100 MHz,  $\text{CDCl}_3$ )  $\delta$  131.9, 129.3, 63.9, 34.5, 22.5, 13.8, 6.9, 4.7.

## IV. Remote Hydroboration and Alkene Isomerization of Allylic Siloxanes

### Typical procedure A of remote hydroboration of allylic siloxanes

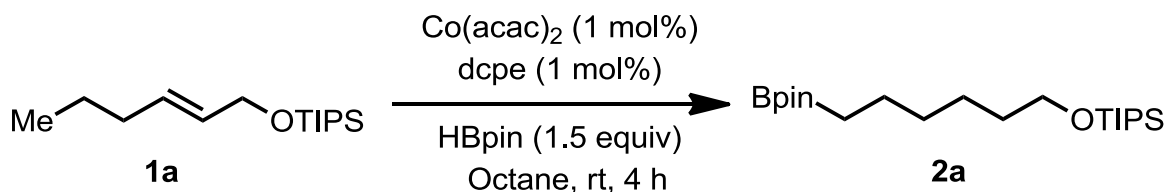

### Triisopropyl((6-(4,4,5,5-tetramethyl-1,3,2-dioxaborolan-2-yl)hexyl)oxy)silane (**2a**)<sup>[4]</sup>

In a glovebox, to an oven-dried 10-mL vial were added  $\text{Co}(\text{acac})_2$  (2.6 mg, 0.01 mmol, 1 mol%),  $\text{dcype}$  (4.3 mg, 0.01 mmol, 1 mol%), and anhydrous octane (1 mL). The resulting solution was stirred for 5 min at room temperature, then  $\text{HBpin}$  (192 mg, 1.5 mmol, 1.5 equiv) was added and the reaction mixture was stirred for 5 min, followed by the addition of **1a** (256 mg, 1.0 mmol, 1.0 equiv) and octane (1 mL). The reaction mixture was sealed, removed from the glovebox and stirred at room temperature for 4 h. After completion, the reaction was filtered through a silica gel pad, washed with ethyl acetate, and concentrated under vacuo. The residue was purified by silica gel flash chromatography (eluent: petroleum ether/ethyl acetate = 100:1) to give the desired product **2a** as colorless oil (315 mg, 82% yield).

$R_f$  = 0.63 (petroleum ether/ethyl acetate = 20/1)

$^1\text{H}$  NMR (400 MHz,  $\text{CDCl}_3$ )  $\delta$  3.63 (t,  $J$  = 6.7 Hz, 2H), 1.55 – 1.45 (m, 2H), 1.43 – 1.34 (m, 2H), 1.33 – 1.25 (m, 4H), 1.21 (s, 12H), 1.12 – 0.98 (m, 21H), 0.74 (t,  $J$  = 7.7 Hz, 2H).

$^{13}\text{C}$  NMR (100 MHz,  $\text{CDCl}_3$ )  $\delta$  82.7, 63.5, 33.0, 32.2, 25.6, 24.8, 24.0, 18.0, 12.0.

$^{29}\text{Si}$  NMR (79.5 MHz,  $\text{CDCl}_3$ )  $\delta$  11.88.

$^{11}\text{B}$  NMR (128.4 MHz,  $\text{CDCl}_3$ )  $\delta$  34.09.

### Triisopropyl((7-(4,4,5,5-tetramethyl-1,3,2-dioxaborolan-2-yl)heptyl)oxy)silane (**2b**)

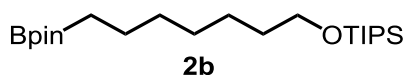

**2b** was prepared as a colorless oil in 72% yield (287 mg, eluent: petroleum ether /ethyl acetate = 100:1) from **1b** (135 mg, 0.5 mmol, 1.0 equiv), Co(acac)<sub>2</sub> (1.3 mg, 0.005 mmol, 1 mol%), dcype (2.2 mg, 0.005 mmol, 1 mol%), and HBpin (96 mg, 0.75 mmol, 1.5 equiv) following **the typical procedure A**.

$R_f$  = 0.63 (petroleum ether/ethyl acetate = 20/1)

<sup>1</sup>H NMR (400 MHz, CDCl<sub>3</sub>) δ 3.66 (t,  $J$  = 6.8 Hz, 2H), 1.57 – 1.49 (m, 2H), 1.46 – 1.36 (m, 2H), 1.36 – 1.27 (m, 6H), 1.24 (s, 12H), 1.12 – 1.02 (m, 21H), 0.77 (t,  $J$  = 7.7 Hz, 2H).

<sup>13</sup>C NMR (100 MHz, CDCl<sub>3</sub>) δ 82.8, 63.5, 33.0, 32.4, 29.2, 25.7, 24.8, 23.9, 18.0, 12.0.

HRMS (ESI<sup>+</sup>) calcd for C<sub>24</sub>H<sub>52</sub>BO<sub>3</sub>Si<sup>+</sup> [M+H]<sup>+</sup>: 427.3779, found: 427.3786.

IR (neat, cm<sup>-1</sup>): 2928, 2865, 1378, 1371, 1317, 1146, 1106, 882, 679.

**Triisopropyl((8-(4,4,5,5-tetramethyl-1,3,2-dioxaborolan-2-yl)octyl)oxy)silane (2c)<sup>[8]</sup>**

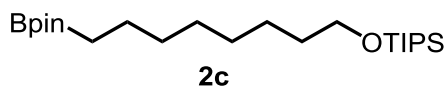

**2c** was prepared as a colorless oil in 78% yield (317 mg, eluent: petroleum ether /ethyl acetate = 100:1) from **1c** (284 mg, 1.0 mmol, 1.0 equiv), Co(acac)<sub>2</sub> (2.6 mg, 0.01 mmol, 1 mol%), dcype (4.3 mg, 0.01 mmol, 1 mol%), and HBpin (192 mg, 1.5 mmol, 1.5 equiv) following **the typical procedure A**.

$R_f$  = 0.64 (petroleum ether/ethyl acetate = 20/1)

<sup>1</sup>H NMR (400 MHz, CDCl<sub>3</sub>) δ 3.62 (t,  $J$  = 6.7 Hz, 2H), 1.54 – 1.44 (m, 2H), 1.37 (d,  $J$  = 8.2 Hz, 2H), 1.29 – 1.22 (m, 8H), 1.20 (s, 12H), 1.11 – 0.98 (m, 21H), 0.72 (t,  $J$  = 7.8 Hz, 2H).

<sup>13</sup>C NMR (100 MHz, CDCl<sub>3</sub>) δ 82.7, 63.5, 33.0, 32.3, 29.4, 29.3, 25.8, 24.7, 23.9, 18.0, 12.0.

**Triisopropyl((9-(4,4,5,5-tetramethyl-1,3,2-dioxaborolan-2-yl)nonyl)oxy)silane (2d)**

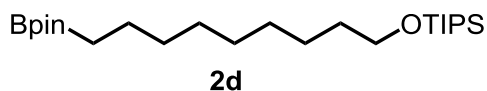

**2d** was prepared as a colorless oil in 66% yield (288 mg, eluent: petroleum ether /ethyl acetate = 100:1) from **1d** (228 mg, 1.0 mmol, 1.0 equiv), Co(acac)<sub>2</sub> (2.6 mg, 0.01 mmol, 1 mol%), dcype (4.3 mg, 0.01 mmol, 1 mol%), and HBpin (192 mg, 1.5 mmol, 1.5 equiv) following **the typical procedure A**.

$R_f$  = 0.67 (petroleum ether/ethyl acetate = 20/1)

<sup>1</sup>H NMR (400 MHz, CDCl<sub>3</sub>)  $\delta$  3.66 (t,  $J$  = 6.7 Hz, 2H), 1.59 – 1.47 (m, 2H), 1.44 – 1.35 (m, 2H), 1.35 – 1.25 (m, 10H), 1.23 (s, 12H), 1.12 – 1.00 (m, 21H), 0.76 (t,  $J$  = 7.8 Hz, 2H).

<sup>13</sup>C NMR (100 MHz, CDCl<sub>3</sub>)  $\delta$  82.7, 63.5, 33.0, 32.4, 29.6, 29.5, 29.4, 25.8, 24.8, 24.0, 18.0, 12.0.

HRMS (ESI<sup>+</sup>) calcd for C<sub>26</sub>H<sub>56</sub>BO<sub>3</sub>Si<sup>+</sup> [M+H]<sup>+</sup>: 455.4092, found: 455.4100.

IR (neat, cm<sup>-1</sup>): 926, 2865, 1464, 1378, 1371, 1317, 1146, 1106, 882, 680.

**Triisopropyl((10-(4,4,5,5-tetramethyl-1,3,2-dioxaborolan-2-yl)decyl)oxy)silane (2e)**

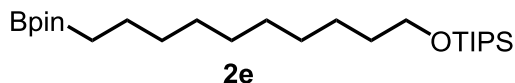

**2e** was prepared as a colorless oil in 79% yield (347 mg, eluent: petroleum ether /ethyl acetate = 100:1) from **1e** (312 mg, 1.0 mmol, 1.0 equiv), Co(acac)<sub>2</sub> (2.6 mg, 0.01 mmol, 1 mol%), dcype (4.3 mg, 0.01 mmol, 1 mol%), and HBpin (192 mg, 1.5 mmol, 1.5 equiv) following **the typical procedure A**.

$R_f$  = 0.65 (petroleum ether/ethyl acetate = 20/1)

<sup>1</sup>H NMR (400 MHz, CDCl<sub>3</sub>)  $\delta$  3.64 (t,  $J$  = 6.6 Hz, 2H), 1.59 – 1.46 (m, 2H), 1.43 – 1.34 (m, 2H), 1.29 – 1.23 (m, 12H), 1.21 (s, 12H), 1.19 – 0.97 (m, 21H), 0.73 (t,  $J$  = 7.8 Hz, 2H).

<sup>13</sup>C NMR (100 MHz, CDCl<sub>3</sub>)  $\delta$  82.7, 63.4, 33.0, 32.4, 29.6, 29.5, 29.4, 29.3, 25.8, 24.7, 23.9, 17.8, 12.0.

HRMS (ESI<sup>+</sup>) calcd for C<sub>25</sub>H<sub>53</sub>BO<sub>3</sub>SiNa<sup>+</sup> [M+Na]<sup>+</sup>: 463.3749, found: 463.3754.

IR (neat, cm<sup>-1</sup>): 2925, 2865, 1464, 1378, 1371, 1317, 1146, 1106, 882, 680.

**Triisopropyl((18-(4,4,5,5-tetramethyl-1,3,2-dioxaborolan-2-yl)octadecyl)oxy)silane (2f)**

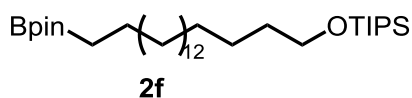

**2f** was prepared as a colorless oil in 75% yield (122 mg, eluent: petroleum ether /ethyl acetate = 100:1) from **1f** (127 mg, 0.3 mmol, 1.0 equiv), Co(acac)<sub>2</sub> (4.0 mg, 0.015 mmol, 5 mol%), dcype (6.3 mg, 0.015 mmol, 5 mol%), and HBpin (58 mg, 0.45 mmol, 1.5 equiv) following **the typical procedure A**.

$R_f$  = 0.65 (petroleum ether/ethyl acetate = 20/1)

<sup>1</sup>H NMR (400 MHz, CDCl<sub>3</sub>)  $\delta$  3.68 (t,  $J$  = 6.7 Hz, 2H), 1.61 – 1.49 (m, 2H), 1.46 – 1.38 (m, 2H), 1.37 – 1.20 (m, 40H), 1.14 – 1.01 (m, 21H), 0.77 (t,  $J$  = 7.7 Hz, 2H).

<sup>13</sup>C NMR (100 MHz, CDCl<sub>3</sub>)  $\delta$  82.8, 63.5, 33.1, 32.4, 29.8 – 29.6 (m, 10C), 29.5, 29.4, 25.8, 24.8, 24.0, 18.0, 12.0.

HRMS (ESI<sup>+</sup>) calcd for C<sub>33</sub>H<sub>68</sub>BO<sub>3</sub>Si<sup>+</sup> [M+H]<sup>+</sup>: 553.5182, found: 553.5194.

IR (neat, cm<sup>-1</sup>): 2923, 2853, 1378, 1371, 1317, 1146, 1105, 882, 680.

**Triisopropyl((20-(4,4,5,5-tetramethyl-1,3,2-dioxaborolan-2-yl)icosyl)oxy)silane (2g)**

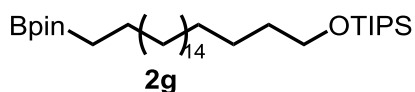

**2g** was prepared as a colorless oil in 67% yield (115 mg, eluent: petroleum ether /ethyl acetate = 100:1) from **1g** (135 mg, 0.3 mmol, 1.0 equiv), Co(acac)<sub>2</sub> (4.0 mg, 0.015 mmol, 5 mol%), dcype (6.3 mg, 0.015 mmol, 5 mol%), and HBpin (58 mg, 0.45 mmol, 1.5 equiv) following **the typical procedure A**.

$R_f$  = 0.65 (petroleum ether/ethyl acetate = 20/1)

<sup>1</sup>H NMR (400 MHz, CDCl<sub>3</sub>)  $\delta$  3.69 (t,  $J$  = 6.7 Hz, 2H), 1.60 – 1.50 (m, 2H), 1.47 – 1.38 (m, 2H), 1.36 – 1.22 (m, 44H), 1.13 – 1.02 (m, 21H), 0.78 (t,  $J$  = 7.8 Hz, 2H).

<sup>13</sup>C NMR (100 MHz, CDCl<sub>3</sub>)  $\delta$  82.8, 63.5, 33.1, 32.5, 29.8 – 29.6 (m, 12C), 29.5, 29.4, 25.8, 24.8, 24.0, 18.0, 12.0.

HRMS (ESI<sup>+</sup>) calcd for C<sub>35</sub>H<sub>71</sub>BO<sub>3</sub>SiNa<sup>+</sup> [M+Na]<sup>+</sup>: 603.5314, found: 603.5315.



**IR (neat, cm<sup>-1</sup>):** 2922, 2853, 1378, 1371, 1317, 1146, 1104, 882, 679.

**Triisopropyl(4-(4,4,5,5-tetramethyl-1,3,2-dioxaborolan-2-yl)butoxy)silane (2h)<sup>[9]</sup>**

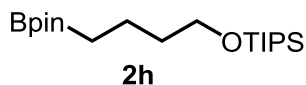

**2h** was prepared as a colorless oil in 92% yield (325 mg, eluent: petroleum ether /ethyl acetate = 100:1) from **1h** (228 mg, 1.0 mmol, 1.0 equiv), Co(acac)<sub>2</sub> (2.6 mg, 0.01 mmol, 1 mol%), dcype (4.3 mg, 0.01 mmol, 1 mol%), and HBpin (192 mg, 1.5 mmol, 1.5 equiv) following **the typical procedure A**.

**R<sub>f</sub>** = 0.66 (petroleum ether/ethyl acetate = 20/1)

**<sup>1</sup>H NMR (400 MHz, CDCl<sub>3</sub>)** δ 3.63 (t, *J* = 6.7 Hz, 2H), 1.57 – 1.48 (m, 2H), 1.47 – 1.38 (m, 2H), 1.20 (s, 12H), 1.06 – 0.98 (m, 21H), 0.75 (t, *J* = 7.7 Hz, 2H).

**<sup>13</sup>C NMR (100 MHz, CDCl<sub>3</sub>)** δ 82.7, 63.2, 35.5, 24.7, 20.2, 18.0, 12.0.

**Triisopropyl((6-methyl-7-(4,4,5,5-tetramethyl-1,3,2-dioxaborolan-2-yl)heptyl)oxy)silane (2i)**

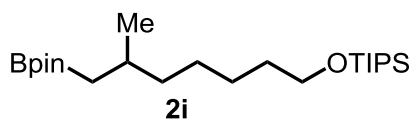

**2i** was prepared as a colorless oil in 66% yield (131 mg, eluent: petroleum ether /ethyl acetate = 100/1 ) from **1i** (135 mg, 0.5 mmol, 1.0 equiv), Co(acac)<sub>2</sub> (6.4 mg, 0.025 mmol, 5 mol%), dcype (10.5 mg, 0.025 mmol, 5 mol%), and HBpin (96 mg, 0.75 mmol, 1.5 equiv) following **the typical procedure A**.

**R<sub>f</sub>** = 0.45 (petroleum ether/ethyl acetate = 40/1)

**<sup>1</sup>H NMR (400 MHz, CDCl<sub>3</sub>)** δ 3.66 (t, *J* = 6.6 Hz, 2H), 1.73 – 1.64 (m, 1H), 1.57 – 1.45 (m, 2H), 1.36 – 1.26 (m, 4H), 1.28 – 1.20 (m, 14H), 1.10 – 1.01 (m, 21H), 0.90 (d, *J* = 6.6 Hz, 3H), 0.88 – 0.78 (m, 2H).

**<sup>13</sup>C NMR (100 MHz, CDCl<sub>3</sub>)** δ 82.9, 77.5, 77.2, 76.8, 63.7, 39.6, 33.5, 29.6, 25.0, 24.9, 23.7, 22.4, 18.2, 12.2.

**HRMS (ESI<sup>+</sup>)** calcd for C<sub>23</sub>H<sub>50</sub>BO<sub>3</sub>Si<sup>+</sup> [*M*+*H*]<sup>+</sup>: 413.3622, found: 413.3629.

**IR (neat, cm<sup>-1</sup>):** 2942, 2866, 1462, 1370, 1314, 1145, 1103, 969, 882, 678.

**((4-Ethyl-6-(4,4,5,5-tetramethyl-1,3,2-dioxaborolan-2-yl)hexyl)oxy)triisopropylsilane(2j)**

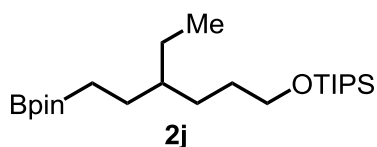

**2j** was prepared as a colorless oil in 69% yield (142 mg, eluent: petroleum ether /ethyl acetate = 100/1) from **1j** (142 mg, 0.5 mmol, 1.0 equiv), Co(acac)<sub>2</sub> (6.4 mg, 0.025 mmol, 5 mol%), dcype (10.5 mg, 0.025 mmol, 5 mol%), and HBpin (96 mg, 0.75 mmol, 1.5 equiv) following **the typical procedure A**.

$R_f$  = 0.5 (petroleum ether/ethyl acetate = 40/1)

<sup>1</sup>H NMR (400 MHz, CDCl<sub>3</sub>) δ 3.63 (t,  $J$  = 6.7 Hz, 2H), 1.55 – 1.45 (m, 2H), 1.41 – 1.30 (m, 5H), 1.25 – 1.18 (m, 14H), 1.12 – 0.98 (m, 21H), 0.82 (t,  $J$  = 7.4 Hz, 3H), 0.76 – 0.67 (m, 2H).

<sup>13</sup>C NMR (100 MHz, CDCl<sub>3</sub>) δ 82.8, 77.3, 77.0, 76.7, 64.0, 40.7, 30.2, 28.6, 27.1, 25.3, 24.8, 18.0, 12.0, 10.8.

HRMS (ESI<sup>+</sup>) calcd for C<sub>23</sub>H<sub>50</sub>BO<sub>3</sub>Si<sup>+</sup> [M+H]<sup>+</sup>: 413.3622, found: 413.3624.

IR (neat, cm<sup>-1</sup>): 2939, 2865, 1462, 1370, 1318, 1145, 1102, 968, 882, 679, 657.

**Triisopropyl((5-phenyl-5-(4,4,5,5-tetramethyl-1,3,2-dioxaborolan-2-yl)pentyl)oxy)silane (2k)**

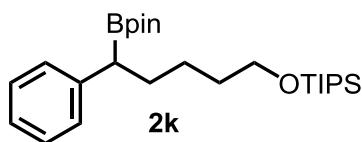

**2k** was prepared as a colorless oil in 86% yield (114 mg, eluent: petroleum ether /ethyl acetate = 100:1) from **1k** (95 mg, 0.3 mmol, 1.0 equiv), Co(acac)<sub>2</sub> (4.0 mg, 0.015 mmol, 5 mol%), dcype (6.3 mg, 0.015 mmol, 5 mol%), and HBpin (58 mg, 0.45 mmol, 1.5 equiv) following **the typical procedure A**.

$R_f$  = 0.48 (petroleum ether/ethyl acetate = 20/1)

<sup>1</sup>H NMR (400 MHz, CDCl<sub>3</sub>) δ 7.26 – 7.14 (m, 4H), 7.13 – 7.04 (m, 1H), 3.61 (t,  $J$  = 6.5, 0.9 Hz, 2H), 2.28 (t,  $J$  = 7.9 Hz, 1H), 1.92 – 1.75 (m, 1H), 1.71 – 1.60 (m, 1H), 1.59 – 1.44 (m, 2H), 1.35 – 1.28 (m, 2H), 1.17 (d,  $J$  = 7.3 Hz, 12H), 1.08 – 0.97 (m, 21H).

$^{13}\text{C}$  NMR (100 MHz,  $\text{CDCl}_3$ )  $\delta$  143.4, 128.4, 128.2, 125.1, 83.2, 63.4, 33.1, 32.6, 25.6, 24.7, 18.1, 12.1.

HRMS (ESI $^+$ ) calcd for  $\text{C}_{26}\text{H}_{48}\text{BO}_3\text{Si}^+$   $[\text{M}+\text{H}]^+$ : 447.3466, found: 447.3473.

IR (neat,  $\text{cm}^{-1}$ ): 2941, 2866, 1462, 1371, 1144, 883, 701, 686, 680, 468, 456.

**Triisopropyl((6-phenyl-6-(4,4,5,5-tetramethyl-1,3,2-dioxaborolan-2-yl)hexyl)oxy)silane (2l)**

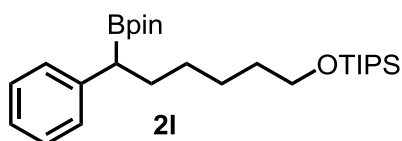

**2l** was prepared as a colorless oil in 84% yield (116 mg, eluent: petroleum ether /ethyl acetate = 100:1) from **1l** (100 mg, 0.3 mmol, 1.0 equiv),  $\text{Co}(\text{acac})_2$  (4.0 mg, 0.015 mmol, 5 mol%), dcype (6.3 mg, 0.015 mmol, 5 mol%), and HBpin (58 mg, 0.45 mmol, 1.5 equiv) following the typical procedure A.

$R_f$  = 0.48 (petroleum ether/ethyl acetate = 20/1)

$^1\text{H}$  NMR (400 MHz,  $\text{CDCl}_3$ )  $\delta$  7.30 – 7.19 (m, 4H), 7.17 – 7.10 (m, 1H), 3.66 (t,  $J$  = 6.7 Hz, 2H), 2.32 (t,  $J$  = 8.0 Hz, 1H), 1.94 – 1.80 (m, 1H), 1.76 – 1.61 (m, 1H), 1.59 – 1.48 (m, 2H), 1.42 – 1.28 (m, 4H), 1.21 (d,  $J$  = 7.8 Hz, 12H), 1.14 – 1.00 (m, 21H).

$^{13}\text{C}$  NMR (100 MHz,  $\text{CDCl}_3$ )  $\delta$  143.6, 128.5, 128.3, 125.2, 83.3, 63.6, 33.1, 32.7, 29.3, 26.0, 24.8, 18.2, 12.2.

HRMS (ESI $^+$ ) calcd for  $\text{C}_{27}\text{H}_{50}\text{BO}_3\text{Si}^+$   $[\text{M}+\text{H}]^+$ : 461.3622, found: 461.3629.

IR (neat,  $\text{cm}^{-1}$ ): 2940, 2865, 1379, 1371, 1320, 1143, 1106, 882, 700, 680, 658.

**Triisopropyl((5-(4,4,5,5-tetramethyl-1,3,2-dioxaborolan-2-yl)-5-(4-(trifluoromethyl)phenyl)pentyl)oxy)silane (2m)**

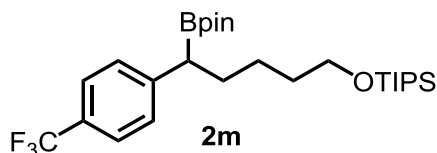

**2m** was prepared as a colorless oil in 72% yield (112 mg, eluent: petroleum ether /ethyl acetate = 100:1) from **1m** (116 mg, 0.3 mmol, 1.0 equiv),  $\text{Co}(\text{acac})_2$  (4.0 mg, 0.015 mmol, 5 mol%), dcype (6.3 mg, 0.015 mmol, 5 mol%), and HBpin (58 mg,

0.45 mmol, 1.5 equiv) following **the typical procedure A**.

$R_f$  = 0.43 (petroleum ether/ethyl acetate = 20/1)

$^1\text{H}$  NMR (400 MHz,  $\text{CDCl}_3$ )  $\delta$  7.52 – 7.46 (m, 2H), 7.34 – 7.28 (m, 2H), 3.64 (t,  $J$  = 6.5 Hz, 2H), 2.38 (t,  $J$  = 7.9 Hz, 1H), 1.96 – 1.82 (m, 1H), 1.75 – 1.62 (m, 1H), 1.62 – 1.46 (m, 2H), 1.37 – 1.29 (m, 2H), 1.20 (d,  $J$  = 5.2 Hz, 12H), 1.11 – 0.98 (m, 21H).

$^{13}\text{C}$  NMR (100 MHz,  $\text{CDCl}_3$ )  $\delta$  146.9, 127.7, 126.6 (q,  $J$  = 32.4 Hz), 124.3 (q,  $J$  = 3.7 Hz), 123.7 (q,  $J$  = 269.8 Hz), 82.7, 62.4, 32.1, 31.4, 24.7, 23.7, 17.2, 11.2.

HRMS (ESI<sup>+</sup>) calcd for  $\text{C}_{27}\text{H}_{47}\text{BF}_3\text{O}_3\text{Si}^+$   $[\text{M}+\text{H}]^+$ : 515.3340, found: 515.3340.

IR (neat,  $\text{cm}^{-1}$ ): 2943, 2863, 1445, 1324, 1125, 1073, 882, 677.

**((5-(4-Fluorophenyl)-5-(4,4,5,5-tetramethyl-1,3,2-dioxaborolan-2-yl)pentyl)oxy)triisopropylsilane (2n)**

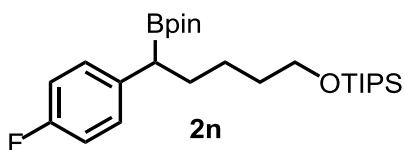

**2n** was prepared as a colorless oil in 65% yield (90 mg, eluent: petroleum ether /ethyl acetate = 100:1) from **1n** (101 mg, 0.3 mmol, 1.0 equiv),  $\text{Co}(\text{acac})_2$  (4.0 mg, 0.015 mmol, 5 mol%), dcype (6.3 mg, 0.015 mmol, 5 mol%), and HBpin (58 mg, 0.45 mmol, 1.5 equiv) following **the typical procedure A**.

$R_f$  = 0.45 (petroleum ether/ethyl acetate = 20/1)

$^1\text{H}$  NMR (400 MHz,  $\text{CDCl}_3$ )  $\delta$  7.19 – 7.07 (m, 2H), 6.97 – 6.88 (m, 2H), 3.64 (t,  $J$  = 6.6 Hz, 2H), 2.29 (t,  $J$  = 7.9 Hz, 1H), 1.91 – 1.77 (m, 1H), 1.70 – 1.45 (m, 3H), 1.39 – 1.28 (m, 2H), 1.20 (d,  $J$  = 6.2 Hz, 12H), 1.13 – 0.96 (m, 21H).

$^{13}\text{C}$  NMR (100 MHz,  $\text{CDCl}_3$ )  $\delta$  161.1 (d,  $J$  = 242.2 Hz), 139.1 (d,  $J$  = 3.1 Hz), 129.7 (d,  $J$  = 7.5 Hz), 115.0 (d,  $J$  = 20.9 Hz), 83.4, 63.5, 33.2, 32.8, 25.7, 24.7, 18.2, 12.1.

HRMS (ESI<sup>+</sup>) calcd for  $\text{C}_{26}\text{H}_{47}\text{BFO}_3\text{Si}^+$   $[\text{M}+\text{H}]^+$ : 465.3372, found: 465.3379.

IR (neat,  $\text{cm}^{-1}$ ): 2942, 2866, 1510, 1463, 1224, 1105, 883, 836, 680.

**Triisopropyl((1-phenyl-6-(4,4,5,5-tetramethyl-1,3,2-dioxaborolan-2-yl)hexyl)oxy)silane (2o)**

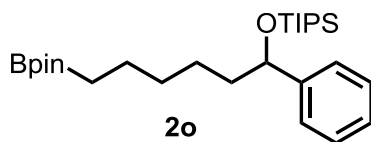

**2o** was prepared as a colorless oil in 91% yield (126 mg, eluent: petroleum ether /ethyl acetate = 100:1) from **1o** (100 mg, 0.3 mmol, 1.0 equiv), Co(acac)<sub>2</sub> (4.0 mg, 0.015 mmol, 5 mol%), dcype (6.3 mg, 0.015 mmol, 5 mol%), and HBpin (58 mg, 0.45 mmol, 1.5 equiv) following **the typical procedure A**.

$R_f$  = 0.36 (petroleum ether/ethyl acetate = 20/1)

**<sup>1</sup>H NMR (400 MHz, CDCl<sub>3</sub>)**  $\delta$  7.31 – 7.24 (m, 4H), 7.23 – 7.18 (m, 1H), 4.74 (t,  $J$  = 6.2 Hz, 1H), 1.82 – 1.73 (m, 1H), 1.73 – 1.59 (m, 1H), 1.40 – 1.31 (m, 2H), 1.23 (m, 16H), 1.06 – 0.92 (m, 21H), 0.72 (t,  $J$  = 7.7 Hz, 2H).

**<sup>13</sup>C NMR (100 MHz, CDCl<sub>3</sub>)**  $\delta$  145.9, 127.9, 126.8, 126.3, 82.9, 75.3, 41.8, 32.7, 24.9, 24.8, 24.1, 18.2, 12.5.

**HRMS (ESI<sup>+</sup>)** calcd for C<sub>27</sub>H<sub>50</sub>BO<sub>3</sub>Si<sup>+</sup> [M+H]<sup>+</sup>: 461.3622, found: 461.3626.

**IR (neat, cm<sup>-1</sup>):** 2932, 2866, 1378, 1371, 1317, 1145, 1093, 1062, 882, 700, 679.

**((1-(4-Fluorophenyl)-6-(4,4,5,5-tetramethyl-1,3,2-dioxaborolan-2-yl)hexyl)oxy)triisopropylsilane (2p)**

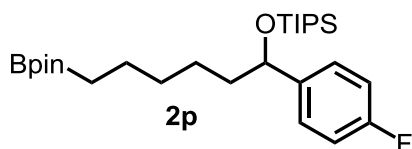

**2p** was prepared as a colorless oil in 88% yield (126 mg, eluent: petroleum ether /ethyl acetate = 100:1) from **1p** (105 mg, 0.3 mmol, 1.0 equiv), Co(acac)<sub>2</sub> (4.0 mg, 0.015 mmol, 5 mol%), dcype (6.3 mg, 0.015 mmol, 5 mol%), and HBpin (58 mg, 0.45 mmol, 1.5 equiv) following **the typical procedure A**.

$R_f$  = 0.42 (petroleum ether/ethyl acetate = 20/1)

**<sup>1</sup>H NMR (400 MHz, CDCl<sub>3</sub>)**  $\delta$  7.28 – 7.20 (m, 2H), 7.00 – 6.91 (m, 2H), 4.72 (t,  $J$  = 6.5 Hz, 1H), 1.80 – 1.56 (m, 2H), 1.41 – 1.28 (m, 2H), 1.25 – 1.20 (m, 16H), 1.08 – 0.88 (m, 21H), 0.71 (t,  $J$  = 7.7 Hz, 2H).

**<sup>13</sup>C NMR (100 MHz, CDCl<sub>3</sub>)**  $\delta$  161.9 (d,  $J$  = 244.1 Hz), 141.6 (d,  $J$  = 3.2 Hz), 127.7 (d,  $J$  = 7.9 Hz), 114.7 (d,  $J$  = 21.1 Hz), 82.9, 74.7, 41.1, 32.6, 24.9, 24.7, 24.1, 18.2, 12.4.

**HRMS (ESI<sup>+</sup>)** calcd for C<sub>27</sub>H<sub>49</sub>BFO<sub>3</sub>Si<sup>+</sup> [M+H]<sup>+</sup>: 479.3528, found: 479.3523.

**IR (neat, cm<sup>-1</sup>):** 2935, 2867, 1509, 1464, 1379, 1222, 1146, 1088, 882, 845, 680.

**Triisopropyl((6-(4,4,5,5-tetramethyl-1,3,2-dioxaborolan-2-yl)-1-(4-(trifluoromethyl)phenyl)hexyl)oxy)silane (2q)**

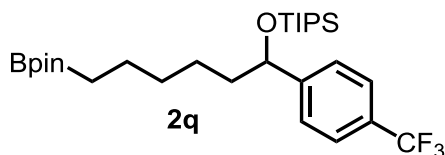

**2q** was prepared as a colorless oil in 82% yield (130 mg, eluent: petroleum ether /ethyl acetate = 100:1) from **1q** (120 mg, 0.3 mmol, 1.0 equiv), Co(acac)<sub>2</sub> (4.0 mg, 0.015 mmol, 5 mol%), dcype (6.3 mg, 0.015 mmol, 5 mol%), and HBpin (58 mg, 0.45 mmol, 1.5 equiv) following **the typical procedure A**.

**R<sub>f</sub>** = 0.38 (petroleum ether/ethyl acetate = 20/1)

**<sup>1</sup>H NMR (400 MHz, CDCl<sub>3</sub>)** δ 7.58 – 7.51 (m, 2H), 7.44 – 7.38 (m, 2H), 4.82 (t, *J* = 6.1 Hz, 1H), 1.82 – 1.62 (m, 2H), 1.43 – 1.29 (m, 2H), 1.28 – 1.13 (m, 16H), 1.08 – 0.92 (m, 21H), 0.71 (t, *J* = 7.8 Hz, 2H).

**<sup>13</sup>C NMR (100 MHz, CDCl<sub>3</sub>)** δ 149.9, 129.1 (q, *J* = 30.9 Hz), 126.5, 125.0 (q, *J* = 3.8 Hz), 124.5 (q, *J* = 270.0 Hz), 83.0, 74.7, 40.8, 32.6, 24.9, 24.4, 24.1, 18.1, 12.4.

**HRMS (ESI<sup>+</sup>)** calcd for C<sub>28</sub>H<sub>49</sub>BF<sub>3</sub>O<sub>3</sub>Si<sup>+</sup> [M+H]<sup>+</sup>: 529.3496, found: 529.3497.

**IR (neat, cm<sup>-1</sup>):** 1325, 1165, 1146, 1127, 1067.

**Triisopropyl((1-(4-methoxyphenyl)-6-(4,4,5,5-tetramethyl-1,3,2-dioxaborolan-2-yl)hexyl)oxy)silane (2r)**

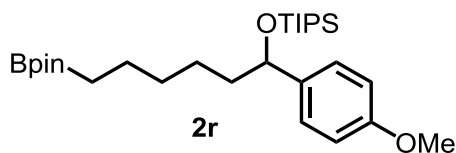

**2r** was prepared as a colorless oil in 85% yield (126 mg, eluent: petroleum ether /ethyl acetate = 100:1) from **1r** (109 mg, 0.3 mmol, 1.0 equiv), Co(acac)<sub>2</sub> (4.0 mg, 0.015 mmol, 5 mol%), dcype (6.3 mg, 0.015 mmol, 5 mol%), and HBpin (58 mg, 0.45 mmol, 1.5 equiv) following **the typical procedure A**.

**R<sub>f</sub>** = 0.35 (petroleum ether/ethyl acetate = 20/1)

$^1\text{H}$  NMR (400 MHz,  $\text{CDCl}_3$ )  $\delta$  7.24 – 7.16 (m, 2H), 6.86 – 6.77 (m, 2H), 4.72 – 4.64 (m, 1H), 3.79 (s, 3H), 1.80 – 1.57 (m, 2H), 1.39 – 1.28 (m, 2H), 1.26 – 1.16 (m, 16H), 1.04 – 0.90 (m, 21H), 0.71 (t,  $J$  = 7.7 Hz, 2H).

$^{13}\text{C}$  NMR (100 MHz,  $\text{CDCl}_3$ )  $\delta$  158.3, 138.0, 127.2, 113.1, 82.8, 74.7, 55.1, 41.0, 32.6, 24.8, 24.0, 18.1, 18.0, 12.3.

HRMS (ESI $^+$ ) calcd for  $\text{C}_{28}\text{H}_{52}\text{BO}_4\text{Si}^+$   $[\text{M}+\text{H}]^+$ : 491.3728, found: 491.3731.

IR (neat,  $\text{cm}^{-1}$ ): 2932, 2865, 1512, 1464, 1378, 1317, 1171, 1145, 1089, 882, 841, 679.

Triisopropyl(4-(6-(4,4,5,5-tetramethyl-1,3,2-dioxaborolan-2-yl)-1-((triisopropylsilyl)oxy)hexyl)phenoxy)silane (2s)

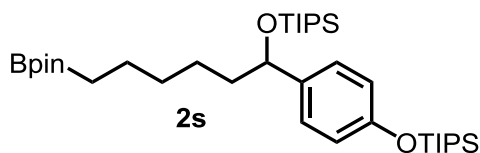

**2s** was prepared as a colorless oil in 88% yield (166 mg, eluent: petroleum ether /ethyl acetate = 100:1) from **1s** (151 mg, 0.3 mmol, 1.0 equiv),  $\text{Co}(\text{acac})_2$  (4.0 mg, 0.015 mmol, 5 mol%),  $\text{dcype}$  (6.3 mg, 0.015 mmol, 5 mol%), and  $\text{HBpin}$  (58 mg, 0.45 mmol, 1.5 equiv) following the typical procedure A.

$R_f$  = 0.35 (petroleum ether/ethyl acetate = 20/1)

$^1\text{H}$  NMR (400 MHz,  $\text{CDCl}_3$ )  $\delta$  7.18 – 7.11 (m, 2H), 6.85 – 6.79 (m, 2H), 4.66 (t,  $J$  = 6.2 Hz, 1H), 1.84 – 1.71 (m, 1H), 1.71 – 1.57 (m, 1H), 1.43 – 1.26 (m, 2H), 1.29 – 1.20 (m, 19H), 1.10 (d,  $J$  = 7.5 Hz, 18H), 1.06 – 0.90 (m, 21H), 0.73 (t,  $J$  = 7.7 Hz, 2H).

$^{13}\text{C}$  NMR (100 MHz,  $\text{CDCl}_3$ )  $\delta$  154.9, 138.6, 127.3, 119.5, 82.9, 75.0, 41.1, 32.7, 24.9, 24.1, 18.2, 18.1, 18.0, 12.7, 12.4.

HRMS (ESI $^+$ ) calcd for  $\text{C}_{36}\text{H}_{70}\text{BO}_4\text{Si}_2^+$   $[\text{M}+\text{H}]^+$ : 633.4906, found: 633.4902.

IR (neat,  $\text{cm}^{-1}$ ): 2942, 2866, 1509, 1379, 1261, 1146, 1089, 914, 882, 846, 679.

Triisopropyl((6-(4,4,5,5-tetramethyl-1,3,2-dioxaborolan-2-yl)-1-(p-tolyl)hexyl)oxy)silane (2t)

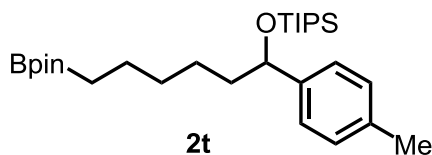

**2t** was prepared as a colorless oil in 88% yield (126 mg, eluent: petroleum ether /ethyl acetate = 100:1) from **1t** (104 mg, 0.3 mmol, 1.0 equiv), Co(acac)<sub>2</sub> (4.0 mg, 0.015 mmol, 5 mol%), dcype (6.3 mg, 0.015 mmol, 5 mol%), and HBpin (58 mg, 0.45 mmol, 1.5 equiv) following **the typical procedure A**.

**R<sub>f</sub>** = 0.35 (petroleum ether/ethyl acetate = 20/1)

**<sup>1</sup>H NMR (400 MHz, CDCl<sub>3</sub>)** δ 7.20 (d, *J* = 7.6 Hz, 2H), 7.11 (d, *J* = 7.7 Hz, 2H), 4.74 (t, *J* = 6.2 Hz, 1H), 2.35 (s, 3H), 1.85 – 1.63 (m, 2H), 1.43 – 1.33 (m, 2H), 1.32 – 1.17 (m, 16H), 1.09 – 0.96 (m, 21H) 0.75 (t, *J* = 7.7 Hz, 2H).

**<sup>13</sup>C NMR (100 MHz, CDCl<sub>3</sub>)** δ 142.9, 136.2, 128.6, 126.2, 82.9, 75.1, 41.1, 32.7, 24.9, 24.8, 24.1, 21.3, 18.2, 12.5.

**HRMS (ESI<sup>+</sup>)** calcd for C<sub>28</sub>H<sub>52</sub>BO<sub>3</sub>Si<sup>+</sup> [M+H]<sup>+</sup>: 475.3779, found: 475.3770.

**IR (neat, cm<sup>-1</sup>):** 2939, 2865, 1372, 1324, 1148, 1105, 882, 852, 816, 676, 658.

**Triisopropyl((1-(4-isopropylphenyl)-6-(4,4,5,5-tetramethyl-1,3,2-dioxaborolan-2-yl)hexyl)oxy)silane (**2u**)**

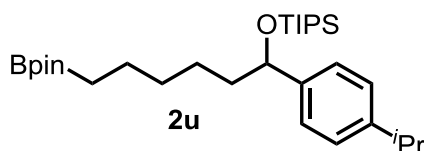

**2u** was prepared as a colorless oil in 81% yield (122 mg, eluent: petroleum ether /ethyl acetate = 100:1) from **1u** (112 mg, 0.3 mmol, 1.0 equiv), Co(acac)<sub>2</sub> (4.0 mg, 0.015 mmol, 5 mol%), dcype (6.3 mg, 0.015 mmol, 5 mol%), and HBpin (58 mg, 0.45 mmol, 1.5 equiv) following **the typical procedure A**.

**R<sub>f</sub>** = 0.42 (petroleum ether/ethyl acetate = 20/1)

**<sup>1</sup>H NMR (400 MHz, CDCl<sub>3</sub>)** δ 7.23 – 7.16 (m, 2H), 7.16 – 7.09 (m, 2H), 4.71 (t, *J* = 6.1 Hz, 1H), 2.95 – 2.79 (m, 1H), 1.85 – 1.71 (m, 1H), 1.70 – 1.57 (m, 1H), 1.45 – 1.31 (m, 2H), 1.25 (s, 6H), 1.24 – 1.21 (m, 16H), 1.09 – 0.84 (m, 21H), 0.73 (t, *J* = 7.7 Hz, 2H).

**<sup>13</sup>C NMR (100 MHz, CDCl<sub>3</sub>)** δ 147.3, 143.2, 126.2, 125.9, 82.9, 75.2, 41.1, 33.9, 32.7, 24.9, 24.2, 24.1, 18.2, 18.1, 12.5.

**HRMS (ESI<sup>+</sup>)** calcd for C<sub>30</sub>H<sub>56</sub>BO<sub>3</sub>Si<sup>+</sup> [M+H]<sup>+</sup>: 503.4092, found: 503.4086.

**IR (neat, cm<sup>-1</sup>):** 2960, 2933, 2866, 1464, 1379, 1371, 1318, 1146, 1090, 1065, 1014, 882, 845, 679.



**((1-(4-(*tert*-Butyl)phenyl)-6-(4,4,5,5-tetramethyl-1,3,2-dioxaborolan-2-yl)hexyl)oxy)triisopropylsilane (2v)**

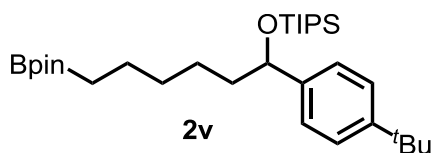

**2v** was prepared as a colorless oil in 80% yield (125 mg, eluent: petroleum ether /ethyl acetate = 100:1) from **1v** (117 mg, 0.3 mmol, 1.0 equiv), Co(acac)<sub>2</sub> (4.0 mg, 0.015 mmol, 5 mol%), dcype (6.3 mg, 0.015 mmol, 5 mol%), and HBpin (58 mg, 0.45 mmol, 1.5 equiv) following **the typical procedure A**.

**R<sub>f</sub>** = 0.48 (petroleum ether/ethyl acetate = 20/1)

**<sup>1</sup>H NMR (400 MHz, CDCl<sub>3</sub>)** δ 7.32 – 7.23 (m, 2H), 7.24 – 7.17 (m, 2H), 4.73 (t, *J* = 6.2 Hz, 1H), 1.84 – 1.60 (m, 2H), 1.45 – 1.34 (m, 2H), 1.33 – 1.29 (s, 9H), 1.28 – 1.19 (m, 16H), 1.05 – 0.92 (m, 21H), 0.73 (t, *J* = 7.8 Hz, 2H).

**<sup>13</sup>C NMR (100 MHz, CDCl<sub>3</sub>)** δ 149.6, 142.7, 125.9, 124.7, 82.9, 75.1, 41.0, 34.5, 32.7, 31.6, 24.9, 24.1, 18.2, 18.1, 12.5.

**HRMS (ESI<sup>+</sup>)** calcd for C<sub>31</sub>H<sub>58</sub>BO<sub>3</sub>Si<sup>+</sup> [M+H]<sup>+</sup>: 517.4248, found: 517.4250.

**IR (neat, cm<sup>-1</sup>):** 2939, 2866, 1464, 1378, 1371, 1318, 1146, 1091, 1065, 883, 846, 680.

**((1-([1,1'-Biphenyl]-4-yl)-6-(4,4,5,5-tetramethyl-1,3,2-dioxaborolan-2-yl)hexyl)oxy)triisopropylsilane (2w)**

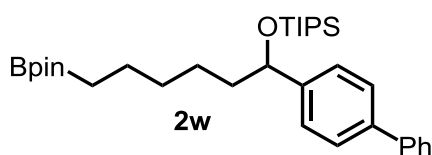

**2w** was prepared as a colorless oil in 82% yield (132 mg, eluent: petroleum ether /ethyl acetate = 100:1) from **1w** (122 mg, 0.3 mmol, 1.0 equiv), Co(acac)<sub>2</sub> (4.0 mg, 0.015 mmol, 5 mol%), dcype (6.3 mg, 0.015 mmol, 5 mol%), and HBpin (58 mg, 0.45 mmol, 1.5 equiv) following **the typical procedure A**.

**R<sub>f</sub>** = 0.48 (petroleum ether/ethyl acetate = 20/1)

**<sup>1</sup>H NMR (400 MHz, CDCl<sub>3</sub>)** δ 7.66 – 7.60 (m, 2H), 7.59 – 7.52 (m, 2H), 7.48 – 7.31 (m, 5H), 4.86 – 4.79 (t, *J* = 5.88 Hz, 1H), 1.90 – 1.68 (m, 2H), 1.46 – 1.35 (m, 2H), 1.34

– 1.18 (m, 16H), 1.14 – 0.94 (m, 21H), 0.76 (t,  $J = 7.7$  Hz, 2H).

$^{13}\text{C}$  NMR (100 MHz,  $\text{CDCl}_3$ )  $\delta$  144.9, 141.2, 139.6, 128.8, 127.1, 126.7, 126.6, 82.9, 75.0, 41.0, 32.7, 24.9, 24.8, 24.1, 18.2, 12.4.

HRMS (ESI $^+$ ) calcd for  $\text{C}_{33}\text{H}_{54}\text{BO}_3\text{Si}^+$   $[\text{M}+\text{H}]^+$ : 537.3935, found: 537.3936.

IR (neat,  $\text{cm}^{-1}$ ): 2935, 2865, 1464, 1371, 1318, 1146, 1091, 882, 847, 697, 680.

**((1-(4-(1,3-Dioxolan-2-yl)phenyl)-6-(4,4,5,5-tetramethyl-1,3,2-dioxaborolan-2-yl)hexyl)oxy)triisopropylsilane (2x)**

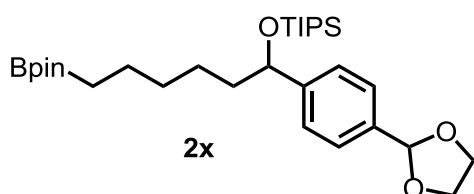

**2x** was prepared as a colorless oil in 64% yield (91 mg, eluent: petroleum ether /ethyl acetate = 50:1) from **1x** (105 mg, 0.3 mmol, 1.0 equiv),  $\text{Co}(\text{acac})_2$  (4.0 mg, 0.015 mmol, 5 mol%), dcype (6.3 mg, 0.015 mmol, 5 mol%), and HBpin (58 mg, 0.45 mmol, 1.5 equiv) following **the typical procedure A**.

$R_f = 0.28$  (petroleum ether/ethyl acetate = 10/1)

$^1\text{H}$  NMR (400 MHz,  $\text{CDCl}_3$ )  $\delta$  7.43 – 7.36 (m, 2H), 7.33 – 7.27 (m, 2H), 5.78 (s, 1H), 4.76 (m, 1H), 4.18 – 3.96 (m, 4H), 1.79 – 1.59 (m, 2H), 1.38 – 1.26 (m, 2H), 1.25 – 1.11 (m, 16H), 1.07 – 0.89 (m, 21H), 0.71 (t,  $J = 7.7$  Hz, 2H).

$^{13}\text{C}$  NMR (100 MHz,  $\text{CDCl}_3$ )  $\delta$  147.0, 136.2, 126.3, 126.2, 104.0, 82.9, 75.0, 65.4, 41.0, 32.7, 24.9, 24.6, 24.1, 18.2, 12.4.

HRMS (ESI $^+$ ) calcd for  $\text{C}_{30}\text{H}_{54}\text{BO}_5\text{Si}^+$   $[\text{M}+\text{H}]^+$ : 533.3834, found: 533.3841.

IR (neat,  $\text{cm}^{-1}$ ): 2938, 2866, 1379, 1371, 1318, 1146, 1084, 968, 882, 846, 680.

**((1-(3,5-Dimethoxyphenyl)-6-(4,4,5,5-tetramethyl-1,3,2-dioxaborolan-2-yl)hexyl)oxy)triisopropylsilane (2y)**

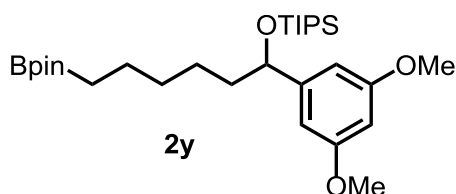

**2y** was prepared as a colorless oil in 64% yield (100 mg, eluent: petroleum ether /ethyl acetate = 50:1) from **1y** (118 mg, 0.3 mmol, 1.0 equiv), Co(acac)<sub>2</sub> (4.0 mg, 0.015 mmol, 5 mol%), dcype (6.3 mg, 0.015 mmol, 5 mol%), and HBpin (58 mg, 0.45 mmol, 1.5 equiv) following **the typical procedure A**.

$R_f$  = 0.52 (petroleum ether/ethyl acetate = 10/1)

<sup>1</sup>H NMR (400 MHz, CDCl<sub>3</sub>) δ 6.50 – 6.45 (m, 2H), 6.33 – 6.29 (m, 1H), 4.68 (t, *J* = 6.0 Hz, 1H), 3.78 (s, 6H), 1.78 – 1.58 (m, 2H), 1.41 – 1.29 (m, 2H), 1.25 – 1.21 (s, 16H), 1.11 – 0.91 (m, 21H), 0.72 (t, *J* = 7.7 Hz, 2H).

<sup>13</sup>C NMR (100 MHz, CDCl<sub>3</sub>) δ 160.4, 148.5, 104.2, 98.8, 82.9, 75.3, 55.4, 40.9, 32.8, 24.9, 24.7, 24.1, 18.2, 12.5.

HRMS (ESI<sup>+</sup>) calcd for C<sub>29</sub>H<sub>54</sub>BO<sub>5</sub>Si<sup>+</sup> [M+H]<sup>+</sup>: 521.3834, found: 521.3837.

IR (neat, cm<sup>-1</sup>): 2935, 2866, 1598, 1463, 1371, 1205, 1152, 1064, 883, 681.

**((1-(3,5-Di-*tert*-butylphenyl)-6-(4,4,5,5-tetramethyl-1,3,2-dioxaborolan-2-yl)hexyl oxy)triisopropylsilane (2z)**

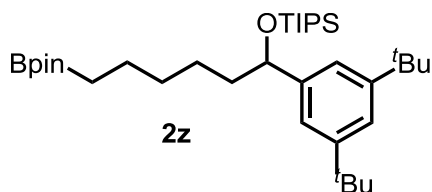

**2z** was prepared as a colorless oil in 68% yield (117 mg, eluent: petroleum ether /ethyl acetate = 100:1) from **1z** (133 mg, 0.3 mmol, 1.0 equiv), Co(acac)<sub>2</sub> (4.0 mg, 0.015 mmol, 5 mol%), dcype (6.3 mg, 0.015 mmol, 5 mol%), and HBpin (58 mg, 0.45 mmol, 1.5 equiv) following **the typical procedure A**.

$R_f$  = 0.46 (petroleum ether/ethyl acetate = 20/1)

<sup>1</sup>H NMR (400 MHz, CDCl<sub>3</sub>) δ 7.28 – 7.21 (m, 1H), 7.15 – 7.08 (m, 2H), 4.69 (t, *J* = 6.2 Hz, 1H), 1.84 – 1.73 (m, 1H), 1.73 – 1.59 (m, 1H), 1.43 – 1.34 (m, 2H), 1.31 (s, 18H), 1.29 – 1.25 (m, 4H), 1.23 (s, 12H), 1.07 – 0.84 (m, 21H), 0.74 (t, *J* = 7.7 Hz, 2H).

<sup>13</sup>C NMR (100 MHz, CDCl<sub>3</sub>) δ 150.0, 145.1, 120.8, 120.5, 82.9, 76.2, 41.1, 34.9, 32.7, 31.6, 25.4, 24.9, 24.1, 18.2, 12.5.

HRMS (ESI<sup>+</sup>) calcd for C<sub>35</sub>H<sub>66</sub>BO<sub>3</sub>Si<sup>+</sup> [M+H]<sup>+</sup>: 573.4874, found: 573.4880.

IR (neat, cm<sup>-1</sup>): 2943, 2866, 1464, 1379, 1317, 1248, 1147, 1092, 1065, 882, 680.

**((1-(3,5-Bis(trifluoromethyl)phenyl)-6-(4,4,5,5-tetramethyl-1,3,2-dioxaborolan-2-yl)hexyl)oxy)triisopropylsilane (2aa)**

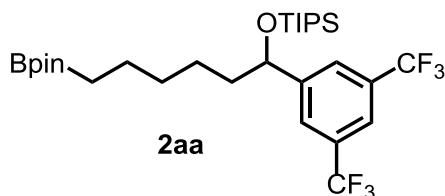

**2aa** was prepared as a colorless oil in 86% yield (154 mg, eluent: petroleum ether /ethyl acetate = 100:1) from **1aa** (146 mg, 0.3 mmol, 1.0 equiv), Co(acac)<sub>2</sub> (4.0 mg, 0.015 mmol, 5 mol%), dcype (6.3 mg, 0.015 mmol, 5 mol%), and HBpin (58 mg, 0.45 mmol, 1.5 equiv) following **the typical procedure A**.

$R_f$  = 0.50 (petroleum ether/ethyl acetate = 20/1)

<sup>1</sup>H NMR (400 MHz, CDCl<sub>3</sub>)  $\delta$  7.79 – 7.72 (m, 3H), 4.90 (t,  $J$  = 5.8 Hz, 1H), 1.83 – 1.64 (m, 2H), 1.42 – 1.31 (m, 2H), 1.31 – 1.11 (m, 16H), 1.11 – 0.91 (m, 21H), 0.72 (t,  $J$  = 7.7 Hz, 2H).

<sup>13</sup>C NMR (100 MHz, CDCl<sub>3</sub>)  $\delta$  148.4, 131.2 (q,  $J$  = 33.1 Hz), 126.2 (q,  $J$  = 3.9 Hz), 123.4 (q,  $J$  = 272.5 Hz), 121.0 – 120.5 (m), 82.9, 74.1, 40.5, 32.4, 24.8, 24.0, 23.9, 17.9, 17.8, 12.2.

HRMS (ESI<sup>+</sup>) calcd for C<sub>29</sub>H<sub>48</sub>BF<sub>6</sub>O<sub>3</sub>Si<sup>+</sup> [M+H]<sup>+</sup>: 597.3370, found: 597.3372.

IR (neat, cm<sup>-1</sup>): 1276, 1171, 1133, 1110, 682.

**Triisopropyl((1-(naphthalen-2-yl)-6-(4,4,5,5-tetramethyl-1,3,2-dioxaborolan-2-yl)hexyl)oxy)silane (2ab)**

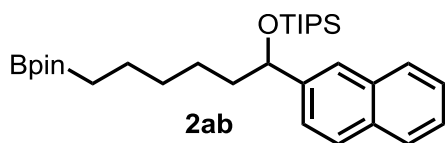

**2ab** was prepared as a colorless oil in 73% yield (112 mg, eluent: petroleum ether /ethyl acetate = 100:1) from **1ab** (115 mg, 0.3 mmol, 1.0 equiv), Co(acac)<sub>2</sub> (4.0 mg, 0.015 mmol, 5 mol%), dcype (6.3 mg, 0.015 mmol, 5 mol%), and HBpin (58 mg, 0.45 mmol, 1.5 equiv) following **the typical procedure A**.

$R_f$  = 0.38 (petroleum ether/ethyl acetate = 20/1)

<sup>1</sup>H NMR (400 MHz, CDCl<sub>3</sub>)  $\delta$  7.87 – 7.77 (m, 3H), 7.74 – 7.68 (m, 1H), 7.55 – 7.40

(m, 3H), 4.94 (t,  $J = 6.9$  Hz, 1H), 1.93 – 1.71 (m, 2H), 1.42 – 1.28 (m, 2H), 1.28 – 1.18 (m, 16H), 1.13 – 0.93 (m, 21H), 0.73 (t,  $J = 7.6$  Hz, 2H).

$^{13}\text{C}$  NMR (100 MHz,  $\text{CDCl}_3$ )  $\delta$  143.3, 133.3, 132.9, 128.0, 127.8, 127.7, 125.8, 125.4, 124.9, 124.7, 82.9, 75.4, 40.9, 32.7, 24.9, 24.8, 24.1, 18.2, 12.5.

HRMS (ESI<sup>+</sup>) calcd for  $\text{C}_{31}\text{H}_{52}\text{BO}_3\text{Si}^+$   $[\text{M}+\text{H}]^+$ : 511.3779, found: 511.3776.

IR (neat,  $\text{cm}^{-1}$ ): 2932, 2865, 1378, 1371, 1145, 1091, 1064, 882, 744, 679, 478

**Triisopropyl((7-(4,4,5,5-tetramethyl-1,3,2-dioxaborolan-2-yl)heptan-2-yl)oxy)silane (2ac)**

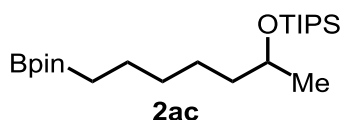

**2ac** was prepared as a colorless oil in 81% yield (174 mg, eluent: petroleum ether /ethyl acetate = 100:1) from **1ac** (153 mg, 0.5 mmol, 1.0 equiv),  $\text{Co}(\text{acac})_2$  (6.4 mg, 0.025 mmol, 5 mol%), dcype (10.5 mg, 0.025 mmol, 5 mol%), and HBpin (96 mg, 0.75 mmol, 1.5 equiv) following **the typical procedure A**.

$R_f = 0.65$  (petroleum ether/ethyl acetate = 20/1)

$^1\text{H}$  NMR (400 MHz,  $\text{CDCl}_3$ )  $\delta$  3.96 – 3.84 (m, 1H), 1.56 – 1.36 (m, 4H), 1.35 – 1.26 (m, 4H), 1.24 (s, 12H), 1.13 (d,  $J = 6.1$  Hz, 3H), 1.08 – 1.03 (m, 21H), 0.76 (t,  $J = 7.8$  Hz, 2H).

$^{13}\text{C}$  NMR (100 MHz,  $\text{CDCl}_3$ )  $\delta$  83.2, 69.1, 40.4, 33.1, 25.6, 25.2, 24.5, 23.9, 18.6, 12.9.

HRMS (ESI<sup>+</sup>) calcd for  $\text{C}_{22}\text{H}_{48}\text{BO}_3\text{Si}^+$   $[\text{M}+\text{H}]^+$ : 399.3466, found: 399.3466.

IR (neat,  $\text{cm}^{-1}$ ): 2931, 2866, 1371, 1317, 1146, 1044, 882, 675.

**Triisopropyl((8-(4,4,5,5-tetramethyl-1,3,2-dioxaborolan-2-yl)octan-3-yl)oxy)silane (2ad)**

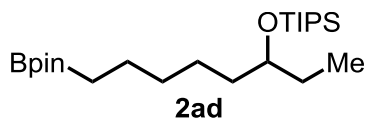

**2ad** was prepared as a colorless oil in 90% yield (200 mg, eluent: petroleum ether /ethyl acetate = 100:1) from **1ad** (160 mg, 0.5 mmol, 1.0 equiv),  $\text{Co}(\text{acac})_2$  (6.4 mg, 0.025 mmol, 5 mol%), dcype (10.5 mg, 0.025 mmol, 5 mol%), and HBpin (96 mg, 0.75 mmol, 1.5 equiv) following **the typical procedure A**.

$R_f = 0.65$  (petroleum ether/ethyl acetate = 20/1)

$^1\text{H NMR}$  (400 MHz,  $\text{CDCl}_3$ )  $\delta$  3.82 – 3.71 (m, 1H), 1.59 – 1.36 (m, 6H), 1.33 – 1.27 (m, 4H), 1.25 (s, 12H), 1.10 – 0.99 (m, 21H), 0.87 (t,  $J = 7.5$  Hz, 3H), 0.78 (t,  $J = 7.8$  Hz, 2H).

$^{13}\text{C NMR}$  (100 MHz,  $\text{CDCl}_3$ )  $\delta$  82.8, 73.3, 36.0, 32.8, 29.0, 24.8, 24.7, 24.0, 18.2, 12.7, 9.0.

HRMS (ESI<sup>+</sup>) calcd for  $\text{C}_{23}\text{H}_{50}\text{BO}_3\text{Si}^+$   $[\text{M}+\text{H}]^+$ : 413.3622, found: 413.3622.

IR (neat,  $\text{cm}^{-1}$ ): 2931, 2866, 1464, 1378, 1371, 1318, 1146, 1055, 1014, 882, 675.

**Triisopropyl((9-(4,4,5,5-tetramethyl-1,3,2-dioxaborolan-2-yl)nonan-4-yl)oxy)silane (2ae)**

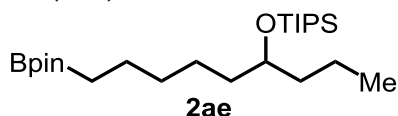

**2ae** was prepared as a colorless oil in 81% yield (103 mg, eluent: petroleum ether /ethyl acetate = 100:1) from **1ae** (90 mg, 0.3 mmol, 1.0 equiv),  $\text{Co}(\text{acac})_2$  (4.0 mg, 0.015 mmol, 5 mol%), dcype (6.3 mg, 0.015 mmol, 5 mol%), and HBpin (58 mg, 0.45 mmol, 1.5 equiv) following **the typical procedure A**.

$R_f = 0.60$  (petroleum ether/ethyl acetate = 20/1)

$^1\text{H NMR}$  (400 MHz,  $\text{CDCl}_3$ )  $\delta$  3.85 – 3.77 (m, 1H), 1.52 – 1.37 (m, 6H), 1.37 – 1.27 (m, 6H), 1.25 (s, 12H), 1.06 (d,  $J = 2.1$  Hz, 21H), 0.90 (t,  $J = 7.2$  Hz, 3H), 0.78 (t,  $J = 7.8$  Hz, 2H).

$^{13}\text{C NMR}$  (100 MHz,  $\text{CDCl}_3$ )  $\delta$  82.8, 72.2, 38.9, 36.7, 32.8, 24.8, 24.7, 24.1, 18.2, 18.1, 14.4, 12.7.

HRMS (ESI<sup>+</sup>) calcd for  $\text{C}_{24}\text{H}_{52}\text{BO}_3\text{Si}^+$   $[\text{M}+\text{H}]^+$ : 427.3779, found: 427.3795.

IR (neat,  $\text{cm}^{-1}$ ): 2958, 2932, 2866, 1379, 1371, 1318, 1147, 883, 675.

**Triisopropyl((10-(4,4,5,5-tetramethyl-1,3,2-dioxaborolan-2-yl)decan-5-yl)oxy)silane (2af)**

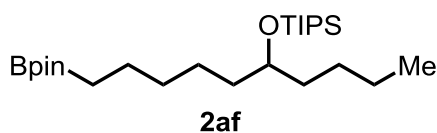

**2af** was prepared as a colorless oil in 66% yield (87 mg, eluent: petroleum ether

/ethyl acetate = 100:1) from **1af** (132 mg, 0.3 mmol, 1.0 equiv), Co(acac)<sub>2</sub> (4.0 mg, 0.015 mmol, 5 mol%), dcype (6.3 mg, 0.015 mmol, 5 mol%), and HBpin (58 mg, 0.45 mmol, 1.5 equiv) following **the typical procedure A**.

R<sub>f</sub> = 0.60 (petroleum ether/ethyl acetate = 20/1)

<sup>1</sup>H NMR (400 MHz, CDCl<sub>3</sub>) δ 3.86 – 3.75 (m, 1H), 1.52 – 1.38 (m, 6H), 1.36 – 1.27 (m, 8H), 1.25 (s, 12H), 1.11 – 1.02 (m, 21H), 0.89 (t, 3H), 0.78 (t, *J* = 7.8 Hz, 2H).

<sup>13</sup>C NMR (100 MHz, CDCl<sub>3</sub>) δ 82.8, 72.3, 36.6, 36.2, 32.8, 27.0, 24.8, 24.7, 24.1, 23.0, 18.2, 14.2, 12.7.

HRMS (ESI<sup>+</sup>) calcd for C<sub>25</sub>H<sub>54</sub>BO<sub>3</sub>Si<sup>+</sup> [M+H]<sup>+</sup>: 441.3930, found: 441.3933.

IR (neat, cm<sup>-1</sup>): 2933, 2866, 1379, 1319, 1147, 1058, 883.

**Triisopropyl((1-phenyl-6-(4,4,5,5-tetramethyl-1,3,2-dioxaborolan-2-yl)hexan-3-yl)oxy)silane (2ag)**

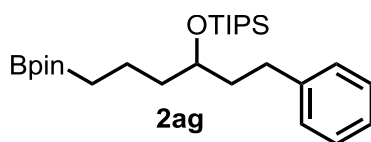

**2ag** was prepared as a colorless oil in 84% yield (115 mg, eluent: petroleum ether /ethyl acetate = 50:1) from **1ag** (99 mg, 0.3 mmol, 1.0 equiv), Co(acac)<sub>2</sub> (4.0 mg, 0.015 mmol, 5 mol%), dcype (6.3 mg, 0.015 mmol, 5 mol%), and HBpin (58 mg, 0.45 mmol, 1.5 equiv) following **the typical procedure A**.

R<sub>f</sub> = 0.50 (petroleum ether/ethyl acetate = 10/1)

<sup>1</sup>H NMR (400 MHz, CDCl<sub>3</sub>) δ 7.32 – 7.24 (m, 2H), 7.23 – 7.14 (m, 3H), 3.94 – 3.84 (m, 1H), 2.76 – 2.60 (m, 2H), 1.92 – 1.70 (m, 2H), 1.65 – 1.53 (m, 2H), 1.53 – 1.38 (m, 2H), 1.25 (d, *J* = 1.0 Hz, 12H), 1.16 – 0.99 (m, 21H), 0.81 (t, *J* = 7.5 Hz, 2H).

<sup>13</sup>C NMR (100 MHz, CDCl<sub>3</sub>) δ 143.1, 128.5, 128.4, 125.7, 83.0, 71.9, 39.3, 38.4, 31.1, 25.0, 19.7, 18.4, 12.8.

HRMS (ESI<sup>+</sup>) calcd for C<sub>27</sub>H<sub>50</sub>BO<sub>3</sub>Si<sup>+</sup> [M+H]<sup>+</sup>: 461.3622, found: 461.3627.

IR (neat, cm<sup>-1</sup>): 2942, 2866, 1464, 1379, 1318, 1146, 1092, 1062, 883, 699, 677.

**3,3,12,12-Tetraisopropyl-2,13-dimethyl-5-(3-(4,4,5,5-tetramethyl-1,3,2-dioxaborolan-2-yl)propyl)-4,11-dioxo-3,12-disilatetradecane (2ah)**

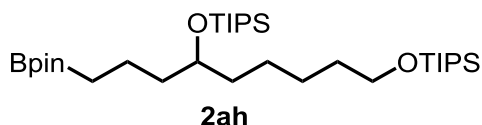

**2ah** was prepared as a colorless oil in 85% yield (153 mg, eluent: petroleum ether /ethyl acetate = 100:1) from **1ah** (140 mg, 0.3 mmol, 1.0 equiv), Co(acac)<sub>2</sub> (4.0 mg, 0.015 mmol, 5 mol%), dcype (6.3 mg, 0.015 mmol, 5 mol%), and HBpin (58 mg, 0.45 mmol, 1.5 equiv) following **the typical procedure A**.

$R_f$  = 0.43 (petroleum ether/ethyl acetate = 20/1)

<sup>1</sup>H NMR (400 MHz, CDCl<sub>3</sub>) δ 3.83 – 3.75 (m, 1H), 3.66 (t,  $J$  = 6.7 Hz, 2H), 1.59 – 1.51 (m, 2H), 1.50 – 1.37 (m, 6H), 1.36 – 1.28 (m, 4H), 1.23 (s, 12H), 1.09 – 1.01 (m, 42H), 0.76 (t,  $J$  = 6.9 Hz, 2H).

<sup>13</sup>C NMR (100 MHz, CDCl<sub>3</sub>) δ 83.0, 72.3, 63.6, 39.5, 36.6, 33.3, 26.3, 25.0, 24.7, 19.6, 18.4, 18.2, 12.8, 12.1, 1.2.

HRMS (ESI<sup>+</sup>) calcd for C<sub>33</sub>H<sub>72</sub>BO<sub>4</sub>Si<sub>2</sub><sup>+</sup> [M+H]<sup>+</sup>: 599.5062, found: 599.5069.

IR (neat, cm<sup>-1</sup>): 2941, 2866, 1379, 1146, 1100, 1059, 1013, 881, 797, 676, 657.

**((9-Chloro-1-(4,4,5,5-Tetramethyl-1,3,2-dioxaborolan-2-yl)nonan-4-yl)oxy)triisopropylsilane (2ai)**

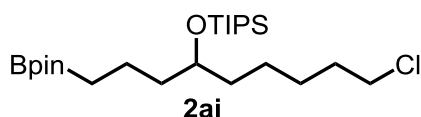

**2ai** was prepared as a colorless oil in 71% yield (98 mg, eluent: petroleum ether /ethyl acetate = 100:1) from **1ai** (100 mg, 0.3 mmol, 1.0 equiv), Co(acac)<sub>2</sub> (4.0 mg, 0.015 mmol, 5 mol%), dcype (6.3 mg, 0.015 mmol, 5 mol%), and HBpin (58 mg, 0.45 mmol, 1.5 equiv) following **the typical procedure A**.

$R_f$  = 0.40 (petroleum ether/ethyl acetate = 20/1)

<sup>1</sup>H NMR (400 MHz, CDCl<sub>3</sub>) δ 3.83 – 3.75 (m, 1H), 3.52 (t,  $J$  = 6.8 Hz, 2H), 1.82 – 1.72 (m, 2H), 1.55 – 1.30 (m, 10H), 1.23 (s, 12H), 1.10 – 0.97 (m, 21H), 0.81 – 0.72 (m, 2H).

<sup>13</sup>C NMR (100 MHz, CDCl<sub>3</sub>) δ 83.0, 72.1, 45.3, 39.4, 36.3, 32.9, 27.4, 25.0, 24.0, 19.6, 18.4, 12.8.

HRMS (ESI<sup>+</sup>) calcd for C<sub>24</sub>H<sub>51</sub>BClO<sub>3</sub>Si<sup>+</sup> [M+H]<sup>+</sup>: 461.3389, found: 461.3386.

IR (neat, cm<sup>-1</sup>): 2942, 2866, 1379, 1371, 1318, 1146, 886, 675.



**Triethyl((2-methyl-10-(4,4,5,5-tetramethyl-1,3,2-dioxaborolan-2-yl)decan-2-yl)oxy)silane (2aj)**

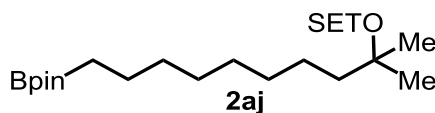

**2aj** was prepared as a colorless oil in 65% yield (80 mg, eluent: petroleum ether /ethyl acetate = 100:1) from **1aj** (85 mg, 0.3 mmol, 1.0 equiv), Co(acac)<sub>2</sub> (4.0 mg, 0.015 mmol, 5 mol%), dcype (6.3 mg, 0.015 mmol, 5 mol%), and HBpin (58 mg, 0.45 mmol, 1.5 equiv) following **the typical procedure A**.

$R_f$  = 0.52 (petroleum ether/ethyl acetate = 20/1)

<sup>1</sup>H NMR (400 MHz, CDCl<sub>3</sub>)  $\delta$  1.43 – 1.36 (m, 4H), 1.33 – 1.21 (m, 22H), 1.17 (s, 6H), 0.93 (t,  $J$  = 7.9 Hz, 9H), 0.76 (t,  $J$  = 7.7 Hz, 2H), 0.55 (q,  $J$  = 7.9 Hz, 6H).

<sup>13</sup>C NMR (100 MHz, CDCl<sub>3</sub>)  $\delta$  83.0, 73.6, 45.3, 32.6, 30.4, 30.0, 29.8, 29.6, 25.0, 24.6, 24.2, 7.3, 7.0.

HRMS (ESI<sup>+</sup>) calcd for C<sub>23</sub>H<sub>50</sub>BO<sub>3</sub>Si<sup>+</sup> [M+H]<sup>+</sup>: 413.3622, found: 413.3620.

IR (neat, cm<sup>-1</sup>): 2927, 2876, 1379, 1371, 1317, 1147, 1041, 743, 723.

**((1-Cyclohexyl-6-(4,4,5,5-tetramethyl-1,3,2-dioxaborolan-2-yl)hexyl)oxy)triethylsilane (2ak)**

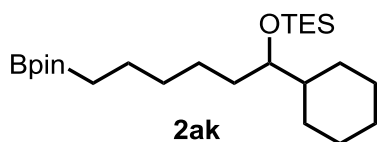

**2ak** was prepared as a colorless oil in 66% yield (84 mg, eluent: petroleum ether /ethyl acetate = 100:1) from **1ak** (89 mg, 0.3 mmol, 1.0 equiv), Co(acac)<sub>2</sub> (4.0 mg, 0.015 mmol, 5 mol%), dcype (6.3 mg, 0.015 mmol, 5 mol%), and HBpin (58 mg, 0.45 mmol, 1.5 equiv) following **the typical procedure A**.

$R_f$  = 0.60 (petroleum ether/ethyl acetate = 20/1)

<sup>1</sup>H NMR (400 MHz, CDCl<sub>3</sub>)  $\delta$  3.46 – 3.40 (m, 1H), 1.79 – 1.60 (m, 6H), 1.47 – 1.33 (m, 6H), 1.33 – 1.21 (m, 16H), 1.20 – 1.01 (m, 3H), 0.97 (t,  $J$  = 8.0 Hz, 9H), 0.78 (t,  $J$  = 7.9 Hz, 2H), 0.60 (q,  $J$  = 7.9 Hz, 6H).

<sup>13</sup>C NMR (100 MHz, CDCl<sub>3</sub>)  $\delta$  83.0, 76.8, 43.4, 33.9, 33.0, 29.0, 28.5, 26.9, 26.7, 25.4,

24.9, 24.2, 7.2, 5.4.

**HRMS (ESI<sup>+</sup>)** calcd for C<sub>24</sub>H<sub>50</sub>BO<sub>3</sub>Si<sup>+</sup> [M+H]<sup>+</sup>: 425.3622, found: 425.3618.

**IR (neat, cm<sup>-1</sup>):** 2926, 2853, 1378, 1317, 1146, 1072, 1005, 969, 723.

## V. Cobalt-Catalyzed Alkene Isomerization of Allylic Siloxanes

Typical procedure B of alkene isomerization of allylic siloxanes

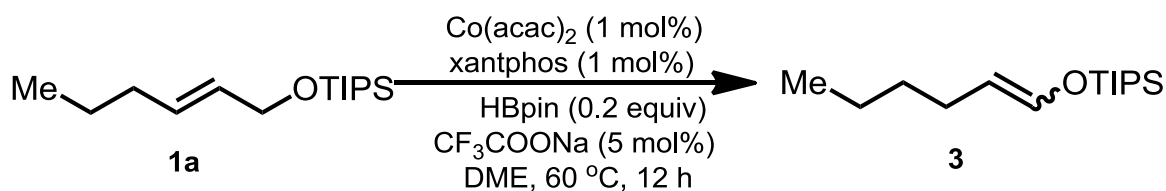

**(Hex-1-en-1-yloxy)triisopropylsilane (3)**<sup>[4]</sup>

In a glovebox, to an oven-dried 10-mL vial were added Co(acac)<sub>2</sub> (1.3 mg, 0.005mmol, 1 mol%), xantphos (2.8 mg, 0.005 mmol, 1 mol%), and anhydrous 1,2-dimethoxyethane (DME) (0.5 mL). The resulting solution was stirred for 10 min at room temperature, then HBpin (12.8 mg, 0.1 mmol, 0.2 equiv) was added. The reaction mixture was stirred for 10 min, and CF<sub>3</sub>COONa (3.4 mg, 0.025 mmol, 5 mol%) was added. The reaction mixture was stirred for 10 min, followed by the addition of **1a** (128 mg, 0.5 mmol, 1.0 equiv) and DME (0.5 mL). The reaction mixture was sealed, removed from the glovebox, and stirred for 12 h at 60 °C in an oil bath. After completion, the reaction mixture was concentrated under vacuo, then filtered through a silica gel pad with ethyl acetate and concentrated under vacuo. The residue was purified by silica gel flash chromatography (eluent: petroleum ether) to give the desired product **3** as colorless oil (110 mg, 86% yield).

**R<sub>f</sub>** = 0.83 (petroleum ether)

**Z/E** = 2.1/1

**Z isomer:** <sup>1</sup>H NMR (400 MHz, CDCl<sub>3</sub>) δ 6.29 – 6.24 (m, 1H), 4.45 – 4.32 (m, 1H), 1.93 – 1.84 (m, 2H), 1.40 – 1.25 (m, 4H), 1.15 – 1.07 (m, 21H), 0.94 – 0.86 (m, 3H).

**E isomer:** <sup>1</sup>H NMR (400 MHz, CDCl<sub>3</sub>) δ 6.34 – 6.29 (m, 1H), 5.0 – 4.96 (m, 1H), 2.19 – 2.05 (m, 2H), 1.40 – 1.25 (m, 4H), 1.15 – 1.07 (m, 21H), 0.94 – 0.86 (m, 3H).

**Z/E mixture:** <sup>13</sup>C NMR (100 MHz, CDCl<sub>3</sub>) δ 140.6, 139.0, 111.4, 110.2, 32.8, 32.1,

27.1, 23.4, 22.5, 22.3, 17.9, 17.8, 14.1, 14.0, 12.2, 12.1.

$^{29}\text{Si}$  NMR (79.5 MHz,  $\text{CDCl}_3$ )  $\delta$  14.65, 14.47.

**(Hept-1-en-1-yloxy)triisopropylsilane (4)<sup>[4]</sup>**

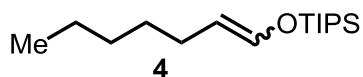

**4** was prepared as a colorless oil in 77% yield (104 mg, eluent: petroleum ether) from **1b** (128 mg, 0.5 mmol, 1.0 equiv),  $\text{Co}(\text{acac})_2$  (1.3 mg, 0.005 mmol, 1 mol%), xantphos (2.8 mg, 0.005 mmol, 1 mol%),  $\text{CF}_3\text{COONa}$  (3.4 mg, 0.025 mmol, 5 mol%), and HBpin (12.8 mg, 0.1 mmol, 0.2 equiv) following **the typical procedure B**.

$R_f$  = 0.83 (petroleum ether)

$Z/E$  = 1.3/1

*Z* isomer:  $^1\text{H}$  NMR (400 MHz,  $\text{CDCl}_3$ )  $\delta$  6.28 – 6.26 (m, 1H), 4.46 – 4.36 (m, 1H), 2.14 – 2.07 (m, 2H), 1.41 – 1.24 (m, 6H), 1.20 – 1.04 (m, 21H), 0.93 – 0.85 (m, 3H).

*E* isomer:  $^1\text{H}$  NMR (400 MHz,  $\text{CDCl}_3$ )  $\delta$  6.33 – 6.28 (m, 1H), 5.06 – 4.96 (m, 1H), 1.92 – 1.81 (m, 2H), 1.41 – 1.24 (m, 6H), 1.20 – 1.04 (m, 21H), 0.93 – 0.85 (m, 3H).

$Z/E$  mixture:  $^{13}\text{C}$  NMR (100 MHz,  $\text{CDCl}_3$ )  $\delta$  140.4, 138.9, 111.3, 110.0, 31.6, 31.2, 30.1, 29.3, 27.2, 23.5, 22.6, 22.5, 17.8, 17.7, 14.0, 12.0, 11.9.

**Triisopropyl(oct-1-en-1-yloxy)silane (5)<sup>[4]</sup>**

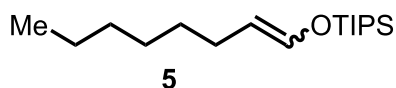

**5** was prepared as a colorless oil in 77% yield (109 mg, eluent: petroleum ether) from **1c** (128 mg, 0.5 mmol, 1.0 equiv),  $\text{Co}(\text{acac})_2$  (1.3 mg, 0.005 mmol, 1 mol%), xantphos (2.8 mg, 0.005 mmol, 1 mol%),  $\text{CF}_3\text{COONa}$  (3.4 mg, 0.025 mmol, 5 mol%), and HBpin (12.8 mg, 0.1 mmol, 0.2 equiv) following **the typical procedure B**.

$R_f$  = 0.65 (petroleum ether)

$Z/E$  = 2.3/1

*Z* isomer:  $^1\text{H}$  NMR (400 MHz,  $\text{CDCl}_3$ )  $\delta$  6.28 – 6.26 (m, 1H), 4.44 – 4.35 (m, 1H), 2.15 – 2.06 (m, 2H), 1.39 – 1.23 (m, 8H), 1.20 – 1.03 (m, 21H), 0.93 – 0.84 (m, 3H).

*E* isomer:  $^1\text{H}$  NMR (400 MHz,  $\text{CDCl}_3$ )  $\delta$  6.33–6.29 (m, 1H), 5.05–4.96 (m, 1H),

1.93–1.82 (m, 2H), 1.39–1.23 (m, 8H), 1.20–1.03 (m, 21H), 0.93–0.84 (m, 3H).

Z/E mixture:  $^{13}\text{C}$  NMR (100 MHz,  $\text{CDCl}_3$ )  $\delta$  140.6, 139.0, 111.5, 110.2, 32.0, 31.9, 30.6, 29.8, 29.2, 28.9, 27.4, 23.7, 22.9, 17.9, 17.8, 14.3, 12.2, 12.1.

#### Triisopropyl(non-1-en-1-yloxy)silane (**6**)<sup>[4]</sup>

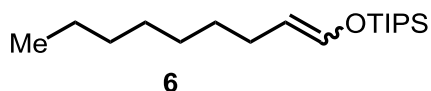

**6** was prepared as a colorless oil in 81% yield (121 mg, eluent: petroleum ether) from **1d** (128 mg, 0.5 mmol, 1.0 equiv),  $\text{Co}(\text{acac})_2$  (1.3 mg, 0.005 mmol, 1 mol%), xantphos (2.8 mg, 0.005 mmol, 1 mol%),  $\text{CF}_3\text{COONa}$  (3.4 mg, 0.025 mmol, 5 mol%), and HBpin (12.8 mg, 0.1 mmol, 0.2 equiv) following the typical procedure B.

$R_f$  = 0.90 (petroleum ether)

E/Z = 3.2/1

Z isomer:  $^1\text{H}$  NMR (400 MHz,  $\text{CDCl}_3$ )  $\delta$  6.31 – 6.28 (m, 1H), 4.47 – 4.37 (m, 1H), 2.17 – 2.09 (m, 2H), 1.41 – 1.25 (m, 10H), 1.21 – 1.07 (m, 21H), 0.91 (t,  $J$  = 6.8 Hz, 3H).

E isomer:  $^1\text{H}$  NMR (400 MHz,  $\text{CDCl}_3$ )  $\delta$  6.35 – 6.31 (m, 1H), 5.09 – 4.97 (m, 1H), 1.94 – 1.87 (m, 2H), 1.41– 1.25 (m, 10H), 1.21 – 1.07 (m, 21H), 0.91 (t,  $J$  = 6.8 Hz, 3H).

Z/E mixture:  $^{13}\text{C}$  NMR (100 MHz,  $\text{CDCl}_3$ )  $\delta$  140.6, 139.0, 111.5, 110.2, 32.1, 30.7, 29.9, 29.5, 29.4, 29.3, 29.2, 27.4, 23.7, 22.9, 22.8, 17.9, 17.8, 14.3, 12.2, 12.1.

#### (Dec-1-en-1-yloxy)triisopropylsilane (**7**)<sup>[4]</sup>

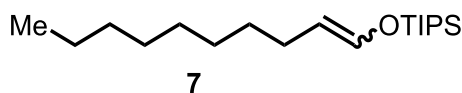

**7** was prepared as a colorless oil in 68% yield (103 mg, eluent: petroleum ether) from **1e** (128 mg, 0.5 mmol, 1.0 equiv),  $\text{Co}(\text{acac})_2$  (1.3 mg, 0.005 mmol, 1 mol%), xantphos (2.8 mg, 0.005 mmol, 1 mol%),  $\text{CF}_3\text{COONa}$  (3.4 mg, 0.025 mmol, 5 mol%), and HBpin (12.8 mg, 0.1 mmol, 0.2 equiv) following the typical procedure B.

$R_f$  = 0.85 (petroleum ether)

Z/E = 2.8/1

*Z* isomer:  $^1\text{H}$  NMR (400 MHz,  $\text{CDCl}_3$ )  $\delta$  6.28 – 6.26 (m, 1H), 4.43 – 4.36 (m, 1H), 2.15 – 2.06 (m, 2H), 1.39 – 1.22 (m, 12H), 1.21 – 1.04 (m, 21H), 0.91 – 0.86 (m, 3H).

*E* isomer:  $^1\text{H}$  NMR (400 MHz,  $\text{CDCl}_3$ )  $\delta$  6.33 – 6.28 (m, 1H), 5.05 – 4.95 (m, 1H), 1.92 – 1.82 (m, 2H), 1.39 – 1.22 (m, 12H), 1.21 – 1.04 (m, 21H), 0.91 – 0.86 (m, 3H).

*Z/E* mixture:  $^{13}\text{C}$  NMR (100 MHz,  $\text{CDCl}_3$ )  $\delta$  140.6, 139.0, 111.5, 110.2, 32.1, 32.0, 30.7, 29.9, 29.7, 29.6, 29.2, 29.6, 29.5, 27.4, 23.7, 22.9, 22.8, 17.9, 17.8, 14.2, 12.2, 12.1.

#### Triisopropyl(octadec-1-en-1-yloxy)silane (**8**)<sup>[4]</sup>

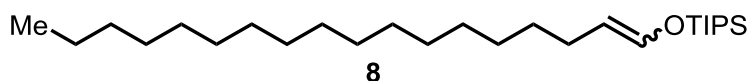

**8** was prepared as a colorless oil in 71% yield (154 mg, eluent: petroleum ether) from **1f** (128 mg, 0.5 mmol, 1.0 equiv),  $\text{Co}(\text{acac})_2$  (1.3 mg, 0.005 mmol, 1 mol%), xantphos (2.8 mg, 0.005 mmol, 1 mol%),  $\text{CF}_3\text{COONa}$  (3.4 mg, 0.025 mmol, 5 mol%), and HBpin (12.8 mg, 0.1 mmol, 0.2 equiv) following **the typical procedure B**.

$R_f$  = 0.89 (petroleum ether)

*Z/E* = 1.7/1

*Z* isomer:  $^1\text{H}$  NMR (400 MHz,  $\text{CDCl}_3$ )  $\delta$  6.28 – 6.26 (m, 1H), 4.43 – 4.36 (m, 1H), 2.15 – 2.06 (m, 2H), 1.38 – 1.22 (m, 28H), 1.20 – 1.04 (m, 21H), 0.89 (t,  $J$  = 6.7 Hz, 3H).

*E* isomer:  $^1\text{H}$  NMR (400 MHz,  $\text{CDCl}_3$ )  $\delta$  6.32 – 6.28 (m, 1H), 5.05 – 4.96 (m, 1H), 1.92 – 1.84 (m, 2H), 1.38 – 1.22 (m, 28H), 1.20 – 1.04 (m, 21H), 0.89 (t,  $J$  = 6.7 Hz, 3H).

*Z/E* mixture:  $^{13}\text{C}$  NMR (100 MHz,  $\text{CDCl}_3$ )  $\delta$  140.4, 138.9, 111.3, 110.1, 32.0, 30.5, 29.8 – 29.7 (m, 19C), 29.6, 29.5 – 29.4 (m, 3C), 29.1, 27.3, 23.6, 22.7, 17.8, 17.7, 14.1, 12.1, 12.0.

#### (Icos-1-en-1-yloxy)triisopropylsilane (**9**)<sup>[4]</sup>

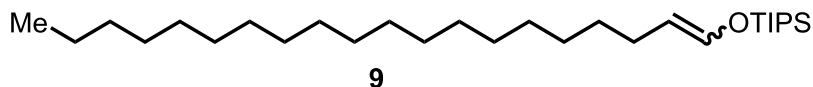

**9** was prepared as a colorless oil in 67% yield (151 mg, eluent: petroleum ether) from **1g** (128 mg, 0.5 mmol, 1.0 equiv),  $\text{Co}(\text{acac})_2$  (1.3 mg, 0.005 mmol, 1 mol%),

xantphos (2.8 mg, 0.005 mmol, 1 mol%), CF<sub>3</sub>COONa (3.4 mg, 0.025 mmol, 5 mol%), and HBpin (12.8 mg, 0.1 mmol, 0.2 equiv) following **the typical procedure B**.

**R<sub>f</sub>** = 0.90 (petroleum ether)

**Z/E** = 3.2/1

**Z isomer:** <sup>1</sup>H NMR (400 MHz, CDCl<sub>3</sub>) δ 6.28 – 6.26 (m, 1H), 4.45 – 4.35 (m, 1H), 2.15 – 2.06 (m, 2H), 1.37 – 1.22 (m, 32H), 1.19 – 1.05 (m, 21H), 0.89 (t, *J* = 6.7 Hz, 3H).

**E isomer:** <sup>1</sup>H NMR (400 MHz, CDCl<sub>3</sub>) δ 6.33 – 6.28 (m, 1H), 5.06 – 4.95 (m, 1H), 1.93 – 1.83 (m, 2H), 1.37 – 1.22 (m, 32H), 1.19 – 1.05 (m, 21H), 0.89 (t, *J* = 6.7 Hz, 3H).

**Z/E mixture:** <sup>13</sup>C NMR (100 MHz, CDCl<sub>3</sub>) δ 140.6, 139.0, 111.5, 110.2, 32.1, 30.7, 30.0 – 29.9 (m, 22C), 29.8, 29.7, 29.6 – 29.5 (m, 3C), 29.2, 27.4, 23.7, 22.9, 17.9, 17.8, 14.3, 12.2, 12.1.

#### **(But-1-en-1-yloxy)triisopropylsilane (10)<sup>[4]</sup>**

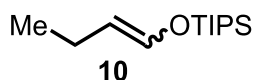

**10** was prepared as a colorless oil in 79% yield (106 mg, eluent: petroleum ether) from **1h** (128 mg, 0.5 mmol, 1.0 equiv), Co(acac)<sub>2</sub> (1.3 mg, 0.005 mmol, 1 mol%), xantphos (2.8 mg, 0.005 mmol, 1 mol%), CF<sub>3</sub>COONa (3.4 mg, 0.025 mmol, 5 mol%), and HBpin (12.8 mg, 0.1 mmol, 0.2 equiv) following **the typical procedure B**.

**R<sub>f</sub>** = 0.79 (petroleum ether)

**Z/E** = 1/1

**Z isomer:** <sup>1</sup>H NMR (400 MHz, CDCl<sub>3</sub>) δ 6.26 – 6.22 (m, 1H), 4.49 – 4.32 (m, 1H), 2.18 – 2.06 (m, 2H), 1.21 – 1.03 (m, 21H), 0.99 – 0.93 (m, 3H).

**E isomer:** <sup>1</sup>H NMR (400 MHz, CDCl<sub>3</sub>) δ 6.35 – 6.29 (m, 1H), 5.11 – 4.96 (m, 1H), 1.97 – 1.85 (m, 2H), 1.21 – 1.03 (m, 21H), 0.99 – 0.93 (m, 3H).

**Z/E mixture:** <sup>13</sup>C NMR (100 MHz, CDCl<sub>3</sub>) δ 140.0, 138.4, 113.0, 111.8, 20.6, 17.8, 17.7, 17.0, 15.1, 14.2, 12.1, 12.0.

#### **Triisopropyl((5-phenylpent-1-en-1-yl)oxy)silane (11)**

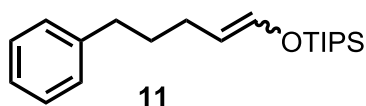

**11** was prepared as a colorless oil in 58% yield (92 mg, eluent: petroleum ether: ethyl acetate = 100:1) from **1k** (128 mg, 0.5 mmol, 1.0 equiv), Co(acac)<sub>2</sub> (1.3 mg, 0.005 mmol, 1 mol%), xantphos (2.8 mg, 0.005 mmol, 1 mol%), CF<sub>3</sub>COONa (3.4 mg, 0.025 mmol, 5 mol%), and HBpin (12.8 mg, 0.1 mmol, 0.2 equiv) following **the typical procedure B**.

$R_f$  = 0.73 (petroleum ether)

Z/E = 1.9/1

Z isomer: <sup>1</sup>H NMR (400 MHz, CDCl<sub>3</sub>) δ 7.34 – 7.27 (m, 2H), 7.25 – 7.16 (m, 3H), 6.35 – 6.33 (m, 1H), 4.51 – 4.43 (m, 1H), 2.66 (m, 2H), 2.24 – 2.17 (m, 2H), 1.75 – 1.63 (m, 2H), 1.19 – 1.08 (m, 21H).

E isomer: <sup>1</sup>H NMR (400 MHz, CDCl<sub>3</sub>) δ 7.34 – 7.27 (m, 2H), 7.25 – 7.16 (m, 3H), 6.39 – 6.35 (m, 1H), 5.11 – 5.03 (m, 1H), 2.66 (m, 2H), 2.02 – 1.92 (m, 2H), 1.75 – 1.63 (m, 2H), 1.19 – 1.08 (m, 21H).

Z/E mixture: <sup>13</sup>C NMR (100 MHz, CDCl<sub>3</sub>) δ 143.1, 142.8, 141.1, 139.5, 128.6, 128.4, 128.3, 125.7, 125.6, 110.8, 109.5, 35.8, 35.4, 32.4, 31.7, 27.1, 23.5, 17.9, 17.8, 12.2, 12.1.

HRMS (ESI<sup>+</sup>) calcd for C<sub>20</sub>H<sub>35</sub>OSi<sup>+</sup> [M+H]<sup>+</sup>: 319.2457, found: 319.2460.

IR (neat, cm<sup>-1</sup>): 2942, 2866, 1656, 1173, 1114, 882, 795, 743, 697, 684, 664.

#### Triisopropyl((6-phenylhex-1-en-1-yl)oxy)silane (**12**)<sup>[4]</sup>

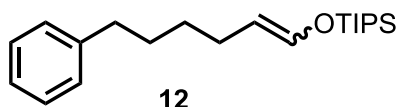

**12** was prepared as a colorless oil in 56% yield (92 mg, eluent: petroleum ether: ethyl acetate = 100:1) from **11** (128 mg, 0.5 mmol, 1.0 equiv), Co(acac)<sub>2</sub> (1.3 mg, 0.005 mmol, 1 mol%), xantphos (2.8 mg, 0.005 mmol, 1 mol%), CF<sub>3</sub>COONa (3.4 mg, 0.025 mmol, 5 mol%), and HBpin (12.8 mg, 0.1 mmol, 0.2 equiv) following **the typical procedure B**.

$R_f$  = 0.42 (petroleum ether)

Z/E = 1/1

Z isomer: <sup>1</sup>H NMR (400 MHz, CDCl<sub>3</sub>) δ 7.33 – 7.16 (m, 5H), 6.36 – 6.32 (m, 1H),

4.45 – 4.38 (m, 1H), 2.64 (m, 2H), 2.23 – 2.13 (m, 2H), 1.74 – 1.59 (m, 2H), 1.48 – 1.36 (m, 2H), 1.20 – 1.09 (m, 21H).

*E* isomer:  $^1\text{H}$  NMR (400 MHz,  $\text{CDCl}_3$ )  $\delta$  7.33 – 7.16 (m, 5H), 6.32 – 6.28 (m, 1H), 5.08 – 4.99 (m, 1H), 2.64 (m, 2H), 2.00 – 1.89 (m, 2H), 1.74 – 1.59 (m, 2H), 1.48 – 1.36 (m, 2H), 1.20 – 1.09 (m, 21H).

*Z/E* mixture:  $^{13}\text{C}$  NMR (100 MHz,  $\text{CDCl}_3$ )  $\delta$  143.1, 142.9, 140.8, 139.3, 128.6, 128.5, 128.3, 128.2, 125.7, 125.6, 111.1, 109.8, 36.0, 35.9, 31.3, 31.0, 30.3, 29.4, 27.2, 23.5, 17.9, 17.8, 12.2, 12.1.

**Triisopropyl((6-(*p*-tolyl)hex-1-en-1-yl)oxy)silane (**13**)<sup>[4]</sup>**

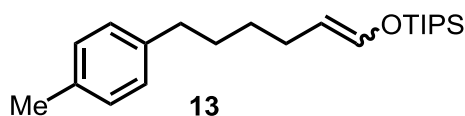

**13** was prepared as a colorless oil in 50% yield (86 mg, eluent: petroleum ether: ethyl acetate = 100:1) from **1aI** (128 mg, 0.5 mmol, 1.0 equiv),  $\text{Co}(\text{acac})_2$  (1.3 mg, 0.005 mmol, 1 mol%), xantphos (2.8 mg, 0.005 mmol, 1 mol%),  $\text{CF}_3\text{COONa}$  (3.4 mg, 0.025 mmol, 5 mol%), and HBpin (12.8 mg, 0.1 mmol, 0.2 equiv) following the typical procedure B.

$R_f$  = 0.39 (petroleum ether)

*E/Z* = 1/1

*E* isomer:  $^1\text{H}$  NMR (400 MHz,  $\text{CDCl}_3$ )  $\delta$  7.16 – 7.07 (m, 4H), 6.33 – 6.30 (m, 1H), 4.51 – 4.37 (m, 1H), 2.61 (m, 2H), 2.36 (s, 3H), 2.24 – 2.13 (m, 2H), 1.73 – 1.58 (m, 2H), 1.51 – 1.37 (m, 2H), 1.25 – 1.02 (m, 21H).

*E* isomer:  $^1\text{H}$  NMR (400 MHz,  $\text{CDCl}_3$ )  $\delta$  7.16 – 7.07 (m, 4H), 6.38 – 6.33 (m, 1H), 5.08 – 4.99 (m, 1H), 2.61 (m, 2H), 2.36 (s, 3H), 2.01 – 1.90 (m, 2H), 1.73 – 1.58 (m, 2H), 1.51 – 1.37 (m, 2H), 1.25 – 1.02 (m, 21H).

*Z/E* mixture:  $^{13}\text{C}$  NMR (100 MHz,  $\text{CDCl}_3$ )  $\delta$  140.7, 140.0, 139.9, 139.2, 135.1, 135.0, 129.1, 129.0, 128.4, 128.4, 111.2, 109.9, 35.5, 35.4, 31.4, 31.2, 30.3, 29.4, 27.3, 23.5, 21.1, 17.9, 17.8, 12.2, 12.1.

**HRMS (ESI<sup>+</sup>)** calcd for  $\text{C}_{22}\text{H}_{39}\text{OSi}^+$  [ $\text{M}+\text{H}$ ]<sup>+</sup>: 347.2770, found: 347.2769.

**IR (neat,  $\text{cm}^{-1}$ ):** 2927, 2866, 1660, 1463, 1170, 1115, 1065, 883, 805, 684, 664.



**Triisopropyl((5-(4-(trifluoromethyl)phenyl)pent-1-en-1-yl)oxy)silane (14)<sup>[4]</sup>**

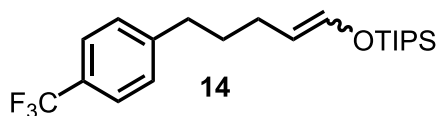

**14** was prepared as a colorless oil in 62% yield (116 mg, eluent: petroleum ether: ethyl acetate = 100:1) from **1m** (128 mg, 0.5 mmol, 1.0 equiv), Co(acac)<sub>2</sub> (1.3 mg, 0.005 mmol, 1 mol%), xantphos (2.8 mg, 0.005 mmol, 1 mol%), CF<sub>3</sub>COONa (3.4 mg, 0.025 mmol, 5 mol%), and HBpin (12.8 mg, 0.1 mmol, 0.2 equiv) following **the typical procedure B**.

$R_f$  = 0.51 (petroleum ether)

Z/E = 2.5/1

Z isomer: <sup>1</sup>H NMR (400 MHz, CDCl<sub>3</sub>) δ 7.56 – 7.49 (m, 2H), 7.32 – 7.25 (m, 2H), 6.33 – 6.30 (m, 1H), 4.47 – 4.39 (m, 1H), 2.73 – 2.63 (m, 2H), 2.21 – 2.11 (m, 2H), 1.75 – 1.63 (m, 2H), 1.14 – 1.03 (m, 21H).

E isomer: <sup>1</sup>H NMR (400 MHz, CDCl<sub>3</sub>) δ 7.56 – 7.49 (m, 2H), 7.32 – 7.25 (m, 2H), 6.37 – 6.33 (m, 1H), 5.10 – 4.95 (m, 1H), 2.73 – 2.63 (m, 2H), 1.99 – 1.89 (m, 2H), 1.75 – 1.63 (m, 2H), 1.22 – 0.98 (m, 21H).

Z/E mixture: <sup>13</sup>C NMR (100 MHz, CDCl<sub>3</sub>) δ 147.0, 146.7, 141.2, 139.6, 128.8, 128.7, 128.0 (dd, *J* = 32.2, 10.6 Hz), 125.2 – 125.0 (m), 124.4 (q, *J* = 270.0 Hz), 124.4 (q, *J* = 270.0 Hz), 110.3, 108.9, 35.4, 35.1, 31.9, 31.2, 26.8, 23.1, 17.8, 17.7, 12.0, 11.9.

**((5-(3-Chlorophenyl)pent-1-en-1-yl)oxy)triisopropylsilane (15)**

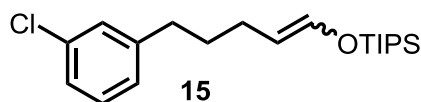

**15** was prepared as a colorless oil in 73% yield (154 mg, eluent: petroleum ether: ethyl acetate = 100:1) from **1am** (128 mg, 0.5 mmol, 1.0 equiv), Co(acac)<sub>2</sub> (1.3 mg, 0.005 mmol, 1 mol%), xantphos (2.8 mg, 0.005 mmol, 1 mol%), CF<sub>3</sub>COONa (3.4 mg, 0.025 mmol, 5 mol%), and HBpin (12.8 mg, 0.1 mmol, 0.2 equiv) following **the typical procedure B**.

$R_f$  = 0.52 (petroleum ether)

Z/E = 1.3/1

Z isomer: <sup>1</sup>H NMR (400 MHz, CDCl<sub>3</sub>) δ 7.38 – 7.31 (m, 1H), 7.25 – 7.09 (m, 3H),

6.36 – 6.32 (m, 1H), 4.53 – 4.43 (m, 1H), 2.82 – 2.71 (m, 2H), 2.28 – 2.17 (m, 2H), 1.76 – 1.62 (m, 2H), 1.22 – 1.07 (m, 21H).

*E* isomer:  $^1\text{H}$  NMR (400 MHz,  $\text{CDCl}_3$ )  $\delta$  7.38 – 7.31 (m, 1H), 7.25 – 7.09 (m, 3H), 6.42 – 6.36 (m, 1H), 5.13 – 5.02 (m, 1H), 2.82 – 2.71 (m, 2H), 2.08 – 1.95 (m, 2H), 1.76 – 1.62 (m, 2H), 1.22 – 1.07 (m, 21H).

*Z/E* mixture:  $^{13}\text{C}$  NMR (100 MHz,  $\text{CDCl}_3$ )  $\delta$  141.2, 140.5, 140.3, 139.6, 134.1, 130.5, 130.5, 129.5, 129.4, 127.2, 127.1, 126.8, 126.7, 110.7, 109.3, 33.5, 33.2, 30.6, 29.8, 27.2, 23.5, 17.9, 17.8, 12.2, 12.1.

HRMS (ESI<sup>+</sup>) calcd for  $\text{C}_{20}\text{H}_{34}\text{ClOSi}^+$   $[\text{M}+\text{H}]^+$ : 353.2067, found: 353.2063.

IR (neat,  $\text{cm}^{-1}$ ): 2943, 2866, 1474, 1463, 1176, 1056, 883, 750, 681.

#### ((4-Ethyl-oct-1-en-1-yl)oxy)triisopropylsilane (**16**)

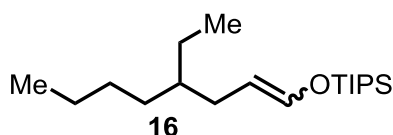

**16** was prepared as a colorless oil in 72% yield (113 mg, eluent: petroleum ether) from **1an** (128 mg, 0.5 mmol, 1.0 equiv),  $\text{Co}(\text{acac})_2$  (1.3 mg, 0.005 mmol, 1 mol%), xantphos (2.8 mg, 0.005 mmol, 1 mol%),  $\text{CF}_3\text{COONa}$  (3.4 mg, 0.025 mmol, 5 mol%), and HBpin (12.8 mg, 0.1 mmol, 0.2 equiv) following the typical procedure B.

$R_f$  = 0.87 (petroleum ether)

*Z/E* = 2.3/1

*Z* isomer:  $^1\text{H}$  NMR (400 MHz,  $\text{CDCl}_3$ )  $\delta$  6.35 – 6.33 (m, 1H), 4.44 – 4.35 (m, 1H), 2.16 – 2.08 (m, 2H), 1.36 – 1.15 (m, 9H), 1.14 – 1.07 (m, 21H), 0.95 – 0.83 (m, 6H).

*E* isomer:  $^1\text{H}$  NMR (400 MHz,  $\text{CDCl}_3$ )  $\delta$  6.32 – 6.29 (m, 1H), 5.03 – 4.93 (m, 1H), 1.91 – 1.84 (m, 2H), 1.36 – 1.15 (m, 9H), 1.14 – 1.07 (m, 21H), 0.95 – 0.83 (m, 6H).

*Z/E* mixture:  $^{13}\text{C}$  NMR (100 MHz,  $\text{CDCl}_3$ )  $\delta$  141.2, 139.6, 109.2, 108.1, 39.8, 39.7, 33.2, 32.7, 30.7, 29.4, 29.2, 27.1, 26.2, 25.8, 23.3, 23.2, 18.2, 17.9, 14.3, 14.2, 12.2, 12.1, 11.3, 11.1.

HRMS (ESI<sup>+</sup>) calcd for  $\text{C}_{19}\text{H}_{41}\text{OSi}^+$   $[\text{M}+\text{H}]^+$ : 313.2927, found: 313.2925.

IR (neat,  $\text{cm}^{-1}$ ): 2958, 2926, 2867, 1655, 1463, 1168, 1095, 996, 882, 684, 663.

**((4-Ethylhex-1-en-1-yl)oxy)triisopropylsilane (17)**

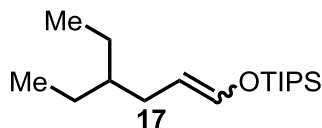

**17** was prepared as a colorless oil in 65% yield (93 mg, eluent: petroleum ether) from **1j** (128 mg, 0.5 mmol, 1.0 equiv), Co(acac)<sub>2</sub> (1.3 mg, 0.005 mmol, 1 mol%), xantphos (2.8 mg, 0.005 mmol, 1 mol%), CF<sub>3</sub>COONa (3.4 mg, 0.025 mmol, 5 mol%), and HBpin (12.8 mg, 0.1 mmol, 0.2 equiv) following **the typical procedure B**.

**R<sub>f</sub>** = 0.89 (petroleum ether)

**Z/E** = 2.5/1

**Z isomer:** <sup>1</sup>H NMR (400 MHz, CDCl<sub>3</sub>) δ 6.33 – 6.30 (m, 1H), 4.42 – 4.32 (m, 1H), 2.16 – 2.04 (m, 2H), 1.36 – 1.22 (m, 4H), 1.20 – 1.17 (m, 1H), 1.17 – 1.05 (m, 21H), 0.89 – 0.82 (m, 6H).

**E isomer:** <sup>1</sup>H NMR (400 MHz, CDCl<sub>3</sub>) δ 6.30 – 6.26 (m, 1H), 5.03 – 4.90 (m, 1H), 1.89 – 1.82 (m, 2H), 1.36 – 1.22 (m, 4H), 1.20 – 1.17 (m, 1H), 1.17 – 1.05 (m, 21H), 0.89 – 0.82 (m, 6H).

**Z/E mixture:** <sup>13</sup>C NMR (100 MHz, CDCl<sub>3</sub>) δ 141.2, 139.6, 109.3, 108.1, 41.4, 41.3, 30.3, 26.7, 25.8, 25.3, 17.9, 17.8, 12.2, 12.1, 11.4, 11.2.

**HRMS (ESI<sup>+</sup>)** calcd for C<sub>17</sub>H<sub>37</sub>OSi<sup>+</sup> [M+H]<sup>+</sup>: 285.2614, found: 285.2618.

**IR (neat, cm<sup>-1</sup>):** 2960, 2944, 2868, 1656, 1463, 1170, 1091, 997, 882, 684, 664.

**Triisopropyl((5-methylhex-1-en-1-yl)oxy)silane (18)<sup>[13]</sup>**

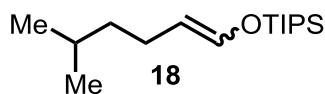

**18** was prepared as a colorless oil in 78% yield (106 mg, eluent: petroleum ether) from **1i** (128 mg, 0.5 mmol, 1.0 equiv), Co(acac)<sub>2</sub> (1.3 mg, 0.005 mmol, 1 mol%), xantphos (2.8 mg, 0.005 mmol, 1 mol%), CF<sub>3</sub>COONa (3.4 mg, 0.025 mmol, 5 mol%), and HBpin (12.8 mg, 0.1 mmol, 0.2 equiv) following **the typical procedure B**.

**R<sub>f</sub>** = 0.92 (petroleum ether)

**Z/E** = 2.4/1

**Z isomer:** <sup>1</sup>H NMR (400 MHz, CDCl<sub>3</sub>) δ 6.28 – 6.24 (m, 1H), 4.43 – 4.34 (m, 1H),

2.17 – 2.07 (m, 2H), 1.63 – 1.49 (m, 1H), 1.29 – 1.21 (m, 2H), 1.21 – 1.00 (m, 21H), 0.92 – 0.85 (m, 6H).

*E* isomer:  $^1\text{H}$  NMR (400 MHz,  $\text{CDCl}_3$ )  $\delta$  6.34 – 6.29 (m, 1H), 5.05 – 4.95 (m, 1H), 1.93 – 1.85 (m, 2H), 1.63 – 1.49 (m, 1H), 1.29 – 1.21 (m, 2H), 1.21 – 1.00 (m, 21H), 0.92 – 0.85 (m, 6H).

*Z/E* mixture:  $^{13}\text{C}$  NMR (100 MHz,  $\text{CDCl}_3$ )  $\delta$  140.5, 138.9, 111.6, 110.3, 39.9, 39.1, 27.8, 27.5, 25.3, 22.7, 22.6, 21.7, 17.9, 17.8, 12.2, 12.1.

**((5,5-Dimethylhex-1-en-1-yl)oxy)triisopropylsilane (19)**

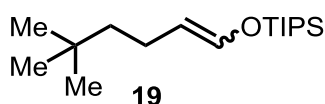

**19** was prepared as a colorless oil in 84% yield (119 mg, eluent: petroleum ether) from **1ao** (128 mg, 0.5 mmol, 1.0 equiv),  $\text{Co}(\text{acac})_2$  (1.3 mg, 0.005 mmol, 1 mol%), xantphos (2.8 mg, 0.005 mmol, 1 mol%),  $\text{CF}_3\text{COONa}$  (3.4 mg, 0.025 mmol, 5 mol%), and HBpin (12.8 mg, 0.1 mmol, 0.2 equiv) following **the typical procedure B**.

$R_f$  = 0.85 (petroleum ether)

*Z/E* = 3.9/1

*Z* isomer:  $^1\text{H}$  NMR (400 MHz,  $\text{CDCl}_3$ )  $\delta$  6.28 – 6.22 (m, 1H), 4.45 – 4.36 (m, 1H), 2.13 – 2.03 (m, 2H), 1.28 – 1.20 (m, 2H), 1.18 – 1.04 (m, 21H), 0.89 (s, 9H).

*E* isomer:  $^1\text{H}$  NMR (400 MHz,  $\text{CDCl}_3$ )  $\delta$  6.34 – 6.29 (m, 1H), 5.04 – 4.95 (m, 1H), 1.92 – 1.79 (m, 2H), 1.28 – 1.20 (m, 2H), 1.18 – 1.04 (m, 21H), 0.89 (s, 9H).

*Z/E* mixture:  $^{13}\text{C}$  NMR (100 MHz,  $\text{CDCl}_3$ )  $\delta$  140.3, 138.8, 112.2, 110.9, 45.3, 44.2, 30.6, 30.5, 29.5, 29.4, 22.8, 19.2, 17.9, 17.8, 12.2, 12.1.

**HRMS (ESI<sup>+</sup>)** calcd for  $\text{C}_{17}\text{H}_{37}\text{OSi}^+$  [ $\text{M}+\text{H}$ ]<sup>+</sup>: 285.2614, found: 285.2613.

**IR (neat,  $\text{cm}^{-1}$ ):** 2946, 2867, 1655, 1465, 1173, 1108, 1061, 996, 882, 683, 664.

**((9-Chloronon-1-en-1-yl)oxy)triisopropylsilane (20)**

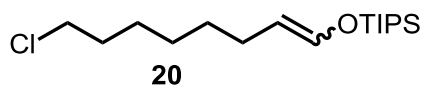

**20** was prepared as a colorless oil in 53% yield (85 mg, eluent: petroleum ether) from **1ap** (128 mg, 0.5 mmol, 1.0 equiv),  $\text{Co}(\text{acac})_2$  (1.3 mg, 0.005 mmol, 1 mol%),

xantphos (2.8 mg, 0.005 mmol, 1 mol%), CF<sub>3</sub>COONa (3.4 mg, 0.025 mmol, 5 mol%), and HBpin (12.8 mg, 0.1 mmol, 0.2 equiv) following **the typical procedure B**.

**R<sub>f</sub>** = 0.62 (petroleum ether)

**Z/E** = 1/1

**Z isomer:** <sup>1</sup>H NMR (400 MHz, CDCl<sub>3</sub>) δ 6.28 – 6.25 (m, 1H), 4.43 – 4.33 (m, 1H), 3.52 (t, *J* = 6.8 Hz, 2H), 2.15 – 2.05 (m, 2H), 1.82 – 1.70 (m, 2H), 1.49 – 1.24 (m, 6H), 1.21 – 1.02 (m, 21H).

**E isomer:** <sup>1</sup>H NMR (400 MHz, CDCl<sub>3</sub>) δ 6.34 – 6.28 (m, 1H), 5.02 – 4.94 (m, 1H), 3.52 (t, *J* = 6.8 Hz, 2H), 1.92 – 1.85 (m, 2H), 1.82 – 1.70 (m, 2H), 1.49 – 1.24 (m, 6H), 1.21 – 1.02 (m, 21H).

**Z/E mixture:** <sup>13</sup>C NMR (100 MHz, CDCl<sub>3</sub>) δ 140.8, 139.3, 111.1, 109.8, 45.3, 45.2, 32.8, 32.7, 30.4, 29.6, 28.7, 28.4, 27.3, 26.9, 26.8, 23.5, 17.9, 17.8, 12.1, 12.0.

**HRMS (ESI<sup>+</sup>)** calcd for C<sub>17</sub>H<sub>36</sub>ClOSi<sup>+</sup> [M+H]<sup>+</sup>: 319.2224, found: 319.2216.

**IR (neat, cm<sup>-1</sup>):** 2931, 2866, 1660, 1464, 1169, 1113, 1069, 882, 800, 683, 656.

### ((3-Cyclopentylprop-1-en-1-yl)oxy)triisopropylsilane (**21**)

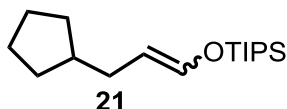

**21** was prepared as a colorless oil in 58% yield (82 mg, eluent: petroleum ether) from **1aq** (128 mg, 0.5 mmol, 1.0 equiv), Co(acac)<sub>2</sub> (1.3 mg, 0.005 mmol, 1 mol%), xantphos (2.8 mg, 0.005 mmol, 1 mol%), CF<sub>3</sub>COONa (3.4 mg, 0.025 mmol, 5 mol%), and HBpin (12.8 mg, 0.1 mmol, 0.2 equiv) following **the typical procedure B**.

**R<sub>f</sub>** = 0.92 (petroleum ether)

**Z/E** = 2.2/1

**Z isomer:** <sup>1</sup>H NMR (400 MHz, CDCl<sub>3</sub>) δ 6.29 – 6.26 (m, 1H), 4.46 – 4.38 (m, 1H), 2.15 – 2.07 (m, 2H), 1.85 – 1.76 (m, 1H), 1.76 – 1.67 (m, 2H), 1.65 – 1.55 (m, 2H), 1.55 – 1.45 (m, 2H), 1.20 – 1.05 (m, 23H).

**E isomer:** <sup>1</sup>H NMR (400 MHz, CDCl<sub>3</sub>) δ 6.33 – 6.29 (m, 1H), 5.06 – 4.97 (m, 1H), 1.91 – 1.86 (m, 2H), 1.85 – 1.76 (m, 1H), 1.76 – 1.67 (m, 2H), 1.65 – 1.55 (m, 2H), 1.55 – 1.45 (m, 2H), 1.20 – 1.05 (m, 23H).

**Z/E mixture:** <sup>13</sup>C NMR (100 MHz, CDCl<sub>3</sub>) δ 140.8, 139.1, 110.8, 109.3, 40.9, 40.4,

33.7, 32.4, 32.3, 29.7, 25.4, 25.3, 17.9, 17.8, 12.2, 12.1.

**HRMS (ESI<sup>+</sup>)** calcd for C<sub>17</sub>H<sub>35</sub>OSi<sup>+</sup> [M+H]<sup>+</sup>: 283.2457, found: 283.2450.

**IR (neat, cm<sup>-1</sup>):** 2944, 2867, 1656, 1464, 1172, 1105, 1070, 1014, 882, 684, 664.

**((3-Cyclohexylprop-1-en-1-yl)oxy)triisopropylsilane (22)**

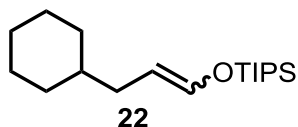

**22** was prepared as a colorless oil in 77% yield (115 mg, eluent: petroleum ether) from **1ar** (128 mg, 0.5 mmol, 1.0 equiv), Co(acac)<sub>2</sub> (1.3 mg, 0.005 mmol, 1 mol%), xantphos (2.8 mg, 0.005 mmol, 1 mol%), CF<sub>3</sub>COONa (3.4 mg, 0.025 mmol, 5 mol%), and HBpin (12.8 mg, 0.1 mmol, 0.2 equiv) following **the typical procedure B**.

**R<sub>f</sub>** = 0.86 (petroleum ether)

**Z/E** = 2.1/1

**Z isomer:** <sup>1</sup>H NMR (400 MHz, CDCl<sub>3</sub>) δ 6.31 – 6.29 (m, 1H), 4.45 – 4.33 (m, 1H), 2.04 – 1.95 (m, 2H), 1.75 – 1.60 (m, 5H), 1.29 – 1.17 (m, 4H), 1.16 – 1.02 (m, 21H), 0.96 – 0.84 (m, 2H).

**E isomer:** <sup>1</sup>H NMR (400 MHz, CDCl<sub>3</sub>) δ 6.29 – 6.24 (m, 1H), 5.04 – 4.95 (m, 1H), 1.81 – 1.75 (m, 2H), 1.75 – 1.60 (m, 5H), 1.29 – 1.17 (m, 4H), 1.16 – 1.02 (m, 21H), 0.96 – 0.84 (m, 2H).

**Z/E mixture:** <sup>13</sup>C NMR (100 MHz, CDCl<sub>3</sub>) δ 141.1, 139.4, 109.7, 108.4, 38.8, 38.5, 35.3, 33.4, 33.2, 31.5, 26.9, 26.8, 26.6, 26.5, 17.9, 17.8, 12.2, 12.1.

**HRMS (ESI<sup>+</sup>)** calcd for C<sub>18</sub>H<sub>37</sub>OSi<sup>+</sup> [M+H]<sup>+</sup>: 297.2614, found: 297.2616.

**IR (neat, cm<sup>-1</sup>):** 2922, 2867, 2852, 1655, 1107, 1069, 882, 684, 665.

**Triisopropyl((6-(thiophen-2-yl)hex-1-en-1-yl)oxy)silane (23)**

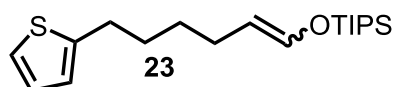

**23** was prepared as a yellow oil in 56% yield (95 mg, eluent: petroleum ether: *ethyl acetate*=100:1) from **1as** (128 mg, 0.5 mmol, 1.0 equiv), Co(acac)<sub>2</sub> (1.3 mg, 0.005 mmol, 1 mol%), xantphos (2.8 mg, 0.005 mmol, 1 mol%), CF<sub>3</sub>COONa (3.4 mg,

0.025 mmol, 5 mol%), and HBpin (12.8 mg, 0.1 mmol, 0.2 equiv) following **the typical procedure B**.

$R_f = 0.60$  (petroleum ether)

$Z/E = 1.9/1$

*Z* isomer:  $^1\text{H}$  NMR (400 MHz,  $\text{CDCl}_3$ )  $\delta$  7.15 – 7.06 (m, 1H), 6.96 – 6.88 (m, 1H), 6.81 – 6.75 (m, 1H), 6.31 – 6.28 (m, 1H), 4.45 – 4.35 (m, 1H), 2.89 – 2.79 (m, 2H), 2.22 – 2.11 (m, 2H), 1.78 – 1.62 (m, 2H), 1.50 – 1.38 (m, 2H), 1.22 – 1.01 (m, 21H).

*E* isomer:  $^1\text{H}$  NMR (400 MHz,  $\text{CDCl}_3$ )  $\delta$  7.15 – 7.06 (m, 1H), 6.96 – 6.88 (m, 1H), 6.81 – 6.75 (m, 1H), 6.36 – 6.31 (m, 1H), 5.05 – 4.97 (m, 1H), 2.89 – 2.79 (m, 2H), 1.99 – 1.89 (m, 2H), 1.78 – 1.62 (m, 2H), 1.50 – 1.38 (m, 2H), 1.22 – 1.01 (m, 21H).

*Z/E* mixture:  $^{13}\text{C}$  NMR (100 MHz,  $\text{CDCl}_3$ )  $\delta$  146.0, 145.8, 140.9, 139.4, 126.7, 126.6, 124.1, 124.0, 122.9, 122.8, 110.9, 109.6, 31.5, 31.3, 30.1, 29.9, 29.2, 27.1, 23.4, 17.9, 17.8, 17.7, 12.2, 12.1.

HRMS (ESI<sup>+</sup>) calcd for  $\text{C}_{19}\text{H}_{35}\text{OSSi}^+$   $[\text{M}+\text{H}]^+$ : 339.2172, found: 339.2181.

IR (neat,  $\text{cm}^{-1}$ ): 2937, 2868, 1654, 1462, 1108, 884, 688.

#### Further investigation of substrate scope of alkene isomerization

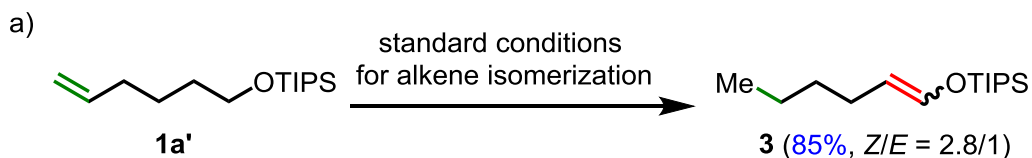

In a glovebox, to an oven-dried 10-mL vial were added  $\text{Co}(\text{acac})_2$  (0.8 mg, 0.003 mmol, 1 mol%), xantphos (1.7 mg, 0.003 mmol, 1 mol%) and anhydrous 1,2-dimethoxyethane (DME) (0.5 mL). The resulting solution was stirred for 10 min at room temperature, then HBpin (7.7 mg, 0.06 mmol, 0.2 equiv) was added and the reaction mixture was stirred for 10 min. and  $\text{CF}_3\text{CO}_2\text{Na}$  (2.1 mg, 0.015 mmol, 5 mol%) was added and the reaction mixture was stirred for 10 min. followed by the addition of **1a'** (76.8 mg, 0.3 mmol) and 1,2-dimethoxyethane (DME) (0.5 mL). The reaction mixture was sealed, removed from the glovebox and stirred for 12 h at 60 °C in an oil bath. After completion, the reaction mixture was concentrated under vacuo, then filtered through a silica gel pad with ethyl acetate and concentrated under vacuo. The residue was purified by silica gel flash chromatography (eluent: petroleum ether) to give the desired product **3** (85%

yield, Z/E = 2.8/1) as a colorless oil. The ratio of Z/E were determined by  $^1\text{H}$  NMR using dibromomethane as the internal standard.

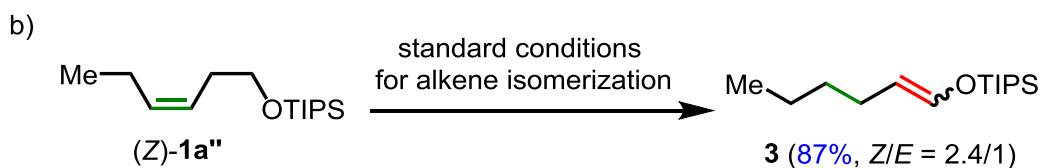

In a glovebox, to an oven-dried 10-mL vial were added  $\text{Co}(\text{acac})_2$  (0.8 mg, 0.003 mmol, 1 mol%), xantphos (1.7 mg, 0.003 mmol, 1 mol%) and anhydrous 1,2-dimethoxyethane (DME) (0.5 mL). The resulting solution was stirred for 10 min at ambient temperature, then HBpin (7.7 mg, 0.06 mmol, 0.2 equiv) was added and the reaction mixture was stirred for 10 min. and  $\text{CF}_3\text{COONa}$  (2.1 mg, 0.015 mmol, 5 mol%) was added and the reaction mixture was stirred for 10 min. followed by the addition of **(Z)-1a''** (76.8 mg, 0.3 mmol) and 1,2-dimethoxyethane (DME) (0.5 mL). The reaction mixture was sealed, removed from the glovebox and stirred for 12 h at 60 °C in an oil bath. After completion, the reaction mixture was concentrated under vacuo, then filtered through a silica gel pad with ethyl acetate and concentrated under vacuo. The residue was purified by silica gel flash chromatography (eluent: petroleum ether) to give the desired product **3** (87% yield, Z/E = 2.4/1) as a colorless oil. The ratio of Z/E were determined by  $^1\text{H}$  NMR using dibromomethane as the internal standard.

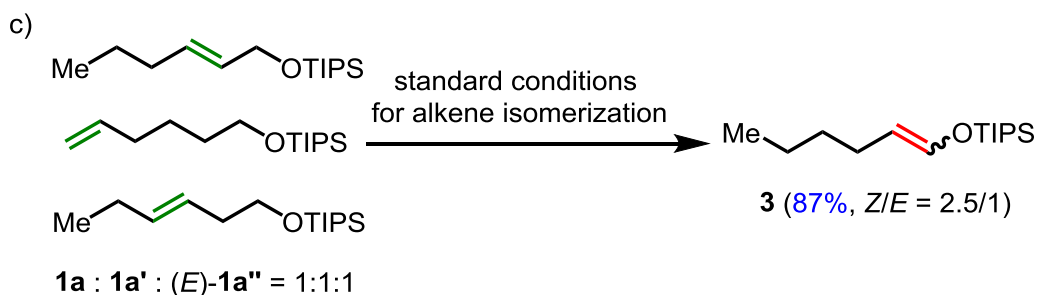

In a glovebox, to an oven-dried 10-mL vial were added  $\text{Co}(\text{acac})_2$  (0.8 mg, 0.003 mmol, 1 mol%), xantphos (1.7 mg, 0.003 mmol, 1 mol%) and anhydrous 1,2-dimethoxyethane (DME) (0.5 mL). The resulting solution was stirred for 10



min at ambient temperature, then HBpin (7.7 mg, 0.06 mmol, 0.2 equiv) was added and the reaction mixture was stirred for 10 min. and CF<sub>3</sub>CO<sub>2</sub>Na (2.1 mg, 0.015 mmol, 5 mol%) was added and the reaction mixture was stirred for 10 min. followed by the addition of **1a** (25.6 mg, 0.1 mmol), **1a'** (25.6 mg, 0.1 mmol), (*E*)-**1a''** (25.6 mg, 0.1 mmol) and 1,2-dimethoxyethane (DME) (0.5 mL). The reaction mixture was sealed, removed from the glovebox and stirred for 12 h at 60 °C in an oil bath. After completion, the reaction mixture was concentrated under vacuo, then filtered through a silica gel pad with ethyl acetate and concentrated under vacuo. The residue was purified by silica gel flash chromatography (eluent: petroleum ether) to give the desired product **3** (87% yield, Z/E = 2.5/1) as colorless oil. The ratio of Z/E were determined by <sup>1</sup>H NMR using dibromomethane as the internal standard.

## VI. Control Experiments and Plausible Catalytic Cycle

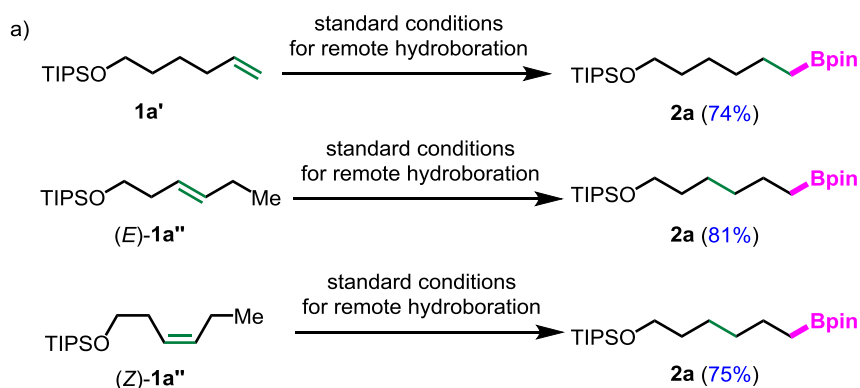

In a glovebox, to an oven-dried 10-mL vial were added  $\text{Co}(\text{acac})_2$  (0.8 mg, 0.003 mmol, 1 mol%), dcype (1.3 mg, 0.003 mmol, 1 mol%), and anhydrous octane (0.5 mL). The resulting solution was stirred for 5 min at room temperature, then HBpin (57.6 mg, 0.45 mmol, 1.5 equiv) was added. The reaction mixture was stirred for 5 min, followed by the addition of **1a'** or **(E)-1a''** or **(Z)-1a''** (76.8 mg, 0.3 mmol, 1.0 equiv) and octane (0.5 mL). The reaction mixture was sealed, removed from the glovebox, and stirred at room temperature for 4 h. After completion, the reaction was filtered through a silica gel pad with ethyl acetate and concentrated under vacuo. The residue was purified by silica gel flash chromatography (eluent: petroleum ether: ethyl acetate = 100:1) to give the desired product **2a**.

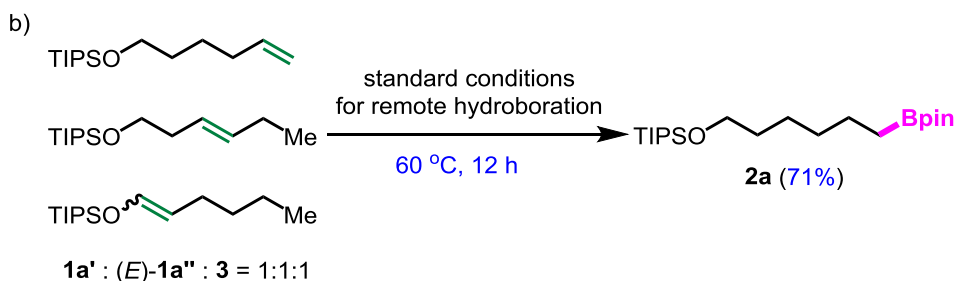

In a glovebox, to an oven-dried 10-mL vial were added  $\text{Co}(\text{acac})_2$  (0.8 mg, 0.003 mmol, 1 mol%), dcype (1.3 mg, 0.003 mmol, 1 mol%) and anhydrous octane (0.5 mL). The resulting solution was stirred for 5 min at room temperature, then HBpin (57.6 mg, 0.45 mmol, 1.5 equiv) was added and the reaction mixture was stirred for 5 min. followed by the addition of **1a'** (25.6 mg, 0.1 mmol), **(E)-1a''** (25.6 mg, 0.1 mmol), **3** (25.6 mg, 0.1 mmol) and octane (0.5 mL). The reaction mixture was sealed, removed from the glovebox and stirred for 12 h at 60 °C in an oil bath.

After completion, the reaction was filtered through a silica gel pad with ethyl acetate and concentrated under vacuo. The residue was purified by silica gel flash chromatography (eluent: petroleum ether/ethyl acetate = 100:1) to give the **2a** (82 mg, 71% yield).

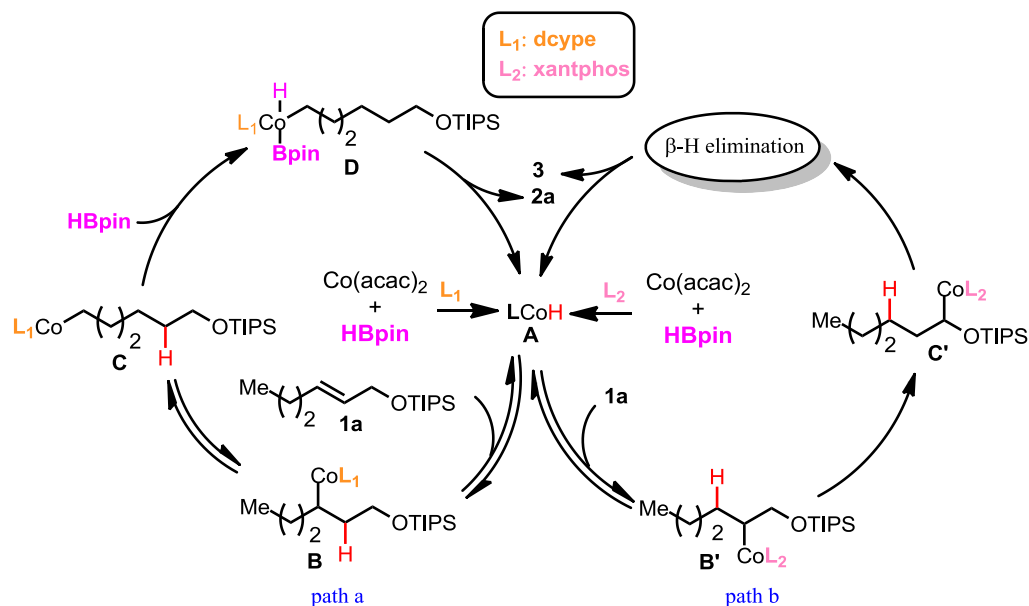

**Figure S1** Plausible catalytic cycle.

Based on the observed results and previous reports, we proposed a plausible catalytic cycle. (Figure S1). For the remote hydroboration, the activation of  $\text{Co}(\text{acac})_2$  with HBpin in the presence of dcype ( $\text{L}_1$ ) generates a cobalt hydride species  $\text{L}_1\text{Co-H}$  (**A**). Then allylic siloxane **1a** undergoes insertion into  $\text{L}_1\text{Co-H}$  to form an alkyl cobalt species (**B**). The following  $\beta$ -H elimination and reinsertion result in the formation of species **C**. Finally, species **C** undergoes metathesis with HBpin to release the borylated product **2a** and regenerates cobalt hydride species **A**. For the alkene isomerization, cobalt hydride species  $\text{L}_2\text{Co-H}$  (**A**) reacted with **1a** to afford cobalt species (**B'**), which then follows  $\beta$ -H elimination and reinsertion to give the intermediate species **C'**. Final  $\beta$ -H elimination affords silyl enol ethers **3** and regenerates cobalt hydride species **A**.

## VII. Gram-Sale Catalytic Reaction and Product Transformations

### Gram-Sale Catalytic Reaction

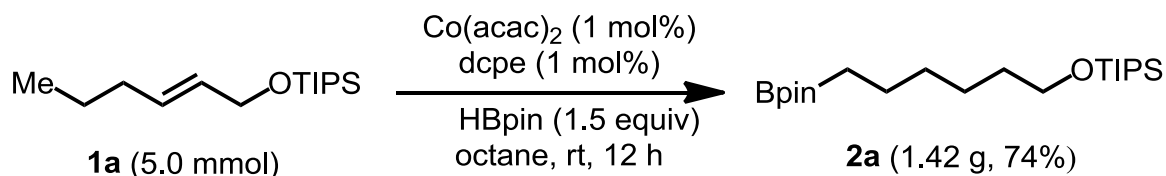

In a glovebox, to an oven-dried round-bottom flask were added  $\text{Co}(\text{acac})_2$  (13.0 mg, 0.05 mmol, 1 mol%),  $\text{dcpe}$  (22.0 mg, 0.05 mmol, 1 mol%) and anhydrous octane (5 mL). The resulting solution was stirred for 5 min at room temperature, then  $\text{HBpin}$  (960 mg, 7.5 mmol, 1.5 equiv) was added. The reaction mixture was stirred for 5 min, followed by the addition of **1a** (1.28 g, 5.0 mmol, 1.0 equiv) and octane (5 mL). The reaction mixture was sealed, removed from the glovebox, and stirred at room temperature for 4 h. After completion, the reaction was filtered through a silica gel pad with ethyl acetate and concentrated under vacuo. The residue was purified by silica gel flash chromatography (eluent: petroleum ether: ethyl acetate = 100:1) to give the desired product **2a** (1.42 g, 74%) as colorless oil.

### Product Transformations

#### Synthesis of Compound **24**<sup>[4,18]</sup>

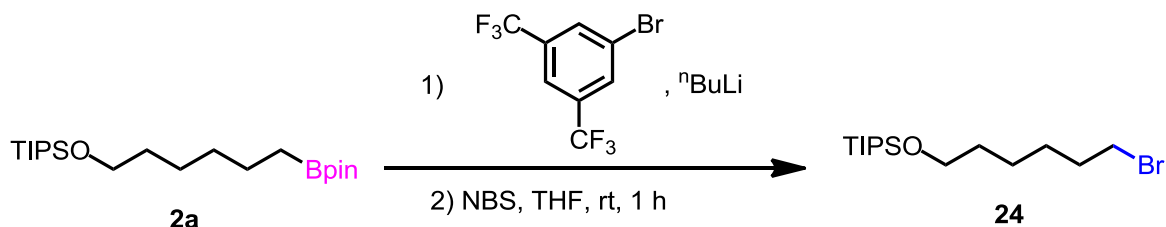

To a solution of 3,5-bis(trifluoromethyl)-1-bromobenzene (132 mg, 0.45 mmol, 1.5 equiv) in THF (1.5 mL) at  $-78^\circ\text{C}$  was dropwise added  $n\text{BuLi}$  (0.18 mL, 2.5 M in hexanes, 0.45 mmol). The mixture was stirred at  $-78^\circ\text{C}$  for 1 h, and then a solution of compound **2a** (115.2 mg, 0.3 mmol, 1.0 equiv) in THF (1.5 mL) was added. The reaction mixture was allowed to stir at  $-78^\circ\text{C}$  for 30 min and at room temperature for 30 min. The resulting solution was added a solution of  $\text{NBS}$  (82 mg, 0.45 mmol, 1.5 equiv) in THF (1.5 mL) dropwise. Upon completion of the reaction, the reaction mixture was quenched with sat.  $\text{Na}_2\text{S}_2\text{O}_3$  (aq.), extracted with ethyl

acetate, dried over  $\text{MgSO}_4$ , filtered, and concentrated under vacuo. The resulting residue was purified by silica gel flash column chromatography (eluent: petroleum ether / dichloromethane = 20:1) to give the desired product **24** (84 mg, 83% yield) as colorless oil.

$R_f$  = 0.33 (petroleum ether).

$^1\text{H}$  NMR (400 MHz,  $\text{CDCl}_3$ )  $\delta$  3.68 (t,  $J$  = 6.4 Hz, 2H), 3.40 (t,  $J$  = 6.9 Hz, 2H), 1.92 – 1.82 (m, 2H), 1.61 – 1.49 (m, 2H), 1.49 – 1.33 (m, 4H), 1.13 – 1.00 (m, 21H).

$^{13}\text{C}$  NMR (100 MHz,  $\text{CDCl}_3$ )  $\delta$  63.4, 34.0, 33.0, 32.9, 28.1, 25.2, 18.2, 12.1.

### Synthesis of Compound **25**<sup>[4,19]</sup>

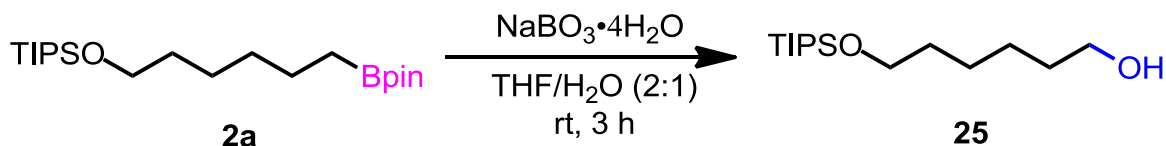

To a solution of **2a** (115 mg, 0.3 mmol, 1.0 equiv) in THF/ $\text{H}_2\text{O}$  (4.5 mL, 2:1(v/v)) was added sodium perborate (238 mg, 1.5 mmol, 5.0 equiv). The reaction mixture was stirred vigorously for 3 h at room temperature. The reaction was quenched with water and extracted with ethyl acetate. The combined organic layers were dried over  $\text{Na}_2\text{SO}_4$  and concentrated in vacuo. The resulting residue was purified by silica gel chromatography (eluent: petroleum ether/ethyl acetate = 20:1) to give the desired product **25** (82 mg, 99% yield) as a colorless oil.

$^1\text{H}$  NMR (400 MHz,  $\text{CDCl}_3$ )  $\delta$  3.70 – 3.58 (m, 4H), 1.63 (br, 1H), 1.60 – 1.49 (m, 4H), 1.44 – 1.30 (m, 4H), 1.18 – 0.93 (m, 21H).

$^{13}\text{C}$  NMR (100 MHz,  $\text{CDCl}_3$ )  $\delta$  63.3, 62.9, 32.9, 32.7, 25.6, 25.5, 18.0, 12.0.

### Synthesis of Compound **26**<sup>[20]</sup>

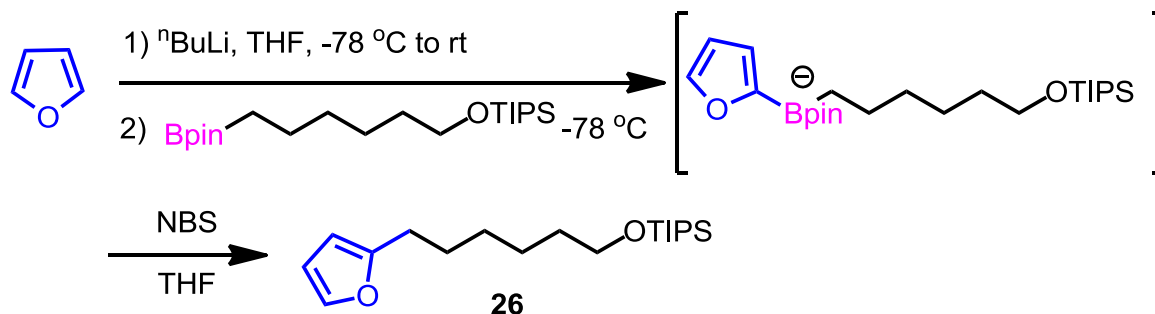

A solution of furan (22  $\mu$ L, 0.36 mmol, 1.2 equiv) in THF (1.0 mL) was cooled to  $-78$   $^{\circ}$ C and treated with  $n$ BuLi (0.15 mL, 0.36 mmol, 1.2 equiv, 1.6 M in hexanes). The cooling bath was removed and the mixture was stirred at room temperature for 1 h. The mixture was cooled to  $-78$   $^{\circ}$ C and **2a** (115 mg, 0.3 mmol, 1.0 equiv) was added dropwise as a solution in THF (1.0 mL). The mixture was stirred at  $-78$   $^{\circ}$ C for 1 h. A solution of NBS (0.36 mmol, 1.2 equiv) in THF (1.0 mL) was added dropwise. After 1 h at  $-78$   $^{\circ}$ C, a saturated aqueous solution of  $\text{Na}_2\text{S}_2\text{O}_3$  (2 mL) was added and the reaction mixture was allowed to warm to room temperature. The reaction mixture was diluted with  $\text{Et}_2\text{O}$  (15 mL) and water (15 mL). The layers were separated and the aqueous layer was extracted with  $\text{Et}_2\text{O}$ . The combined organic layers were dried over  $\text{MgSO}_4$ , filtered and concentrated under vacuum. The crude material was adsorbed on silica and purified by flash column chromatography on silica gel eluting with n-hexane to give the desired product **26** (88 mg, 91% yield) as a colorless oil.

$R_f$  = 0.37 (petroleum ether).

$^1\text{H}$  NMR (400 MHz,  $\text{CDCl}_3$ )  $\delta$  7.30 (d,  $J$  = 1.8 Hz, 1H), 6.31 – 6.25 (m, 1H), 5.98 (d,  $J$  = 3.2 Hz, 1H), 3.69 (t,  $J$  = 6.5 Hz, 2H), 2.63 (t,  $J$  = 7.6 Hz, 2H), 1.72 – 1.50 (m, 4H), 1.46 – 1.34 (m, 4H), 1.13 – 1.02 (m, 21H).

$^{13}\text{C}$  NMR (100 MHz,  $\text{CDCl}_3$ )  $\delta$  156.6, 140.7, 110.1, 104.6, 63.5, 33.0, 29.1, 28.2, 28.0, 25.7, 18.1, 12.1.

HRMS (ESI $^+$ ) calcd for  $\text{C}_{19}\text{H}_{37}\text{O}_2\text{Si}^+$   $[\text{M}+\text{H}]^+$ : 325.2563, found: 325.2561.

IR (neat,  $\text{cm}^{-1}$ ): 2940, 2865, 1464, 1108, 883, 725, 680.

### Synthesis of Compound **27**<sup>[4,21]</sup>

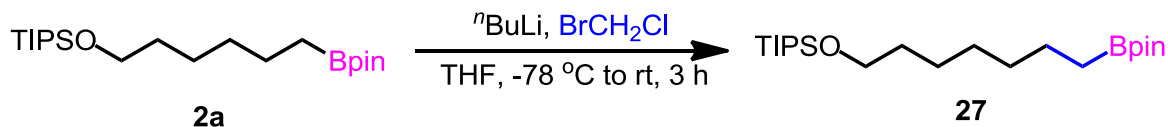

To an oven-dried round-bottom flask were added **2a** (76.8 mg, 0.2 mmol, 1.0 equiv),  $\text{BrCH}_2\text{Cl}$  (26  $\mu$ L, 0.4 mmol, 2.0 equiv), and THF (1.5 mL), and then  $n$ BuLi (0.12 mL, 2.5 M in hexanes, 0.3 mmol) was added at  $-78$   $^{\circ}$ C under  $\text{N}_2$  atmosphere. The resulting mixture was allowed to stir at the same temperature for 10 min and

then allowed to stir at room temperature for 3 h. The mixture was then diluted by H<sub>2</sub>O (5 mL). The biphasic mixture was then extracted by ethyl acetate three times (3 x 5 mL). The combined organic layers were dried over MgSO<sub>4</sub>, filtered, and concentrated under vacuum. The residue was purified by flash column chromatography on silica gel (eluent: petroleum ether/ethyl acetate = 100:1) to give the desired product **27** (53 mg, 67% yield) as colorless oil.

<sup>1</sup>H NMR (400 MHz, CDCl<sub>3</sub>) δ 3.65 (t, *J* = 6.7 Hz, 2H), 1.58 – 1.47 (m, 2H), 1.45 – 1.36 (m, 2H), 1.34 – 1.26 (m, 6H), 1.24 (s, 12H), 1.11 – 1.01 (m, 21H), 0.76 (t, *J* = 7.8, 1.5 Hz, 2H).

<sup>13</sup>C NMR (100 MHz, CDCl<sub>3</sub>) δ 83.0, 63.7, 33.2, 32.4, 29.4, 25.9, 25.0, 24.0, 18.2, 12.2.

#### Synthesis of Compound **28**<sup>[4,22]</sup>

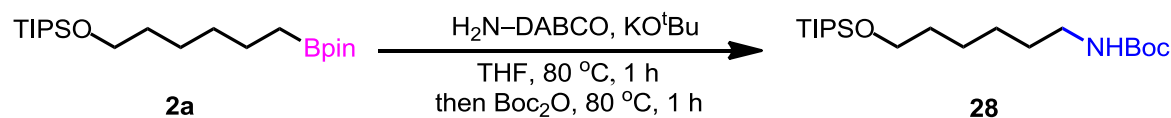

In a glovebox, to an oven-dried round-bottom flask with **2a** (76.8 mg, 0.2 mmol, 1.0 equiv) and THF (1 mL) were added H<sub>2</sub>N-DABCO (76.8 mg, 0.2 mmol, 1.0 equiv) and <sup>t</sup>BuOK (53.8 mg, 0.48 mmol, 2.4 equiv) at room temperature. The reaction mixture was sealed, removed from the glovebox and stirred for 1 h at 80 °C in an oil bath. After completion of the amination, the reaction mixture was cooled to room temperature and bis(1,1-dimethylethyl)este (Boc<sub>2</sub>O) (87.3 mg, 0.4 mmol, 2.0 equiv) was added. The mixture was continued to stir for 1 h at 80 °C in an oil bath. The reaction was then cooled to room temperature and diluted with H<sub>2</sub>O (5 mL) and extracted with ethyl acetate (20 mL) three times. The combined organic phase was then dried over anhydrous Na<sub>2</sub>SO<sub>4</sub>. After removal of the solvent, the residue was purified by column chromatography on silica gel using petroleum ether/ethyl acetate (50:1) as the eluent to afford the desired product **28** as yellow oil (101 mg, 71% yield).

<sup>1</sup>H NMR (400 MHz, CDCl<sub>3</sub>) δ 4.51 (s, 1H), 3.65 (t, *J* = 6.5 Hz, 2H), 3.14 – 3.03 (m, 2H), 1.54 – 1.42 (m, 13H), 1.38 – 1.29 (m, 4H), 1.16 – 0.97 (m, 21H).

<sup>13</sup>C NMR (100 MHz, CDCl<sub>3</sub>) δ 156.1, 79.1, 63.4, 40.7, 33.0, 30.2, 28.6, 26.8, 25.7, 18.2, 12.1.

## Synthesis of Compound 29<sup>[23]</sup>

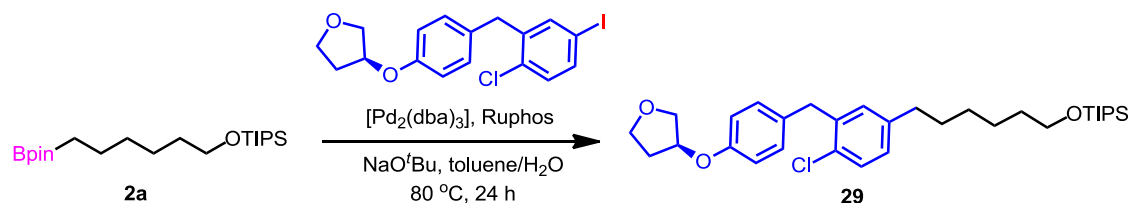

[Pd<sub>2</sub>(dba)<sub>3</sub>] (3.7 mg, 2 mol%), NaO<sup>t</sup>Bu (57.6 mg, 3.0 equiv), Ruphos (3.7 mg, 4 mol%), and iodide (61.4 mg, 0.2 mmol, 1.0 equiv) were added to a Schlenk tube equipped with a stir bar. The vessel was evacuated and filled with N<sub>2</sub> (three cycles). Toluene/H<sub>2</sub>O (*v/v*, 10:1) and **2a** (92.2 mg, 0.24 mmol, 1.2 equiv) were added in turn by syringe under an N<sub>2</sub> atmosphere. The resulting reaction mixture was stirred vigorously for 24 h at 80 °C in an oil bath. At this time, the reaction was cooled to room temperature and was filtered through a celite pad. Then the mixture was extracted with ethyl acetate, washed with brine, dried over MgSO<sub>4</sub>, filtered and concentrated. The residue was purified by column chromatography to afford **29** as a yellow oil (50 mg, 59% yield).

<sup>1</sup>H NMR (400 MHz, CDCl<sub>3</sub>) δ 7.29 – 7.23 (m, 1H), 7.15 – 7.06 (m, 2H), 7.01 – 6.95 (m, 2H), 6.83 – 6.75 (m, 2H), 4.94 – 4.85 (m, 1H), 4.02 – 3.83 (m, 6H), 3.67 (t, *J* = 6.5 Hz, 2H), 2.57 – 2.49 (m, 2H), 2.24 – 2.12 (m, 2H), 1.61 – 1.48 (m, 4H), 1.45 – 1.19 (m, 4H), 1.14 – 0.99 (m, 21H).

<sup>13</sup>C NMR (100 MHz, CDCl<sub>3</sub>) δ 155.8, 141.7, 138.5, 132.2, 131.2, 131.0, 129.9, 129.3, 127.7, 115.3, 77.3, 73.2, 67.2, 63.4, 38.4, 35.3, 33.0, 32.9, 31.4, 29.1, 25.7, 18.1, 12.0.

HRMS (ESI<sup>+</sup>) calcd for C<sub>32</sub>H<sub>50</sub>ClO<sub>3</sub>Si<sup>+</sup> [M+H]<sup>+</sup>: 545.3212, found: 545.3218.

IR (neat, cm<sup>-1</sup>): 2935, 2864, 1508, 1241, 1107, 882, 680.



## VIII. References

- [1] Burks, H. E.; Kliman, L. T.; Morken, J. P. Ultrafast Ligand Exchange: Detection of a Pentacoordinate Ru(II) Intermediate and Product Formation. *J. Am. Chem. Soc.* **2009**, *131*, 9134–9135.
- [2] Srinivas, C.; Kumar, C. N. S. S. P.; Raju, B. C.; Rao, V. J.; V. G. M.; Naidu, V. G. M.; Ramakrishna, S.; Diwan, P. V. First Stereoselective Total Synthesis and Anticancer Activity of New Amide Alkaloids of Roots of Pepper. *Bioorg. Med. Chem. Lett.* **2009**, *19*, 5915–5918.
- [3] Jacolot, M.; Jean, M.; Levoine, N.; van de Weghe, P. The Prins Reaction Using Ketones: Rationalization and Application toward the Synthesis of the Portentol Skeleton. *Org. Lett.* **2012**, *14*, 58–61.
- [4] Li, J.; Qu, S.; Zhao, W. Rhodium-Catalyzed Remote C(sp<sup>3</sup>)-H Borylation of Silyl Enol Ethers. *Angew. Chem., Int. Ed.* **2020**, *59*, 2360–2364.
- [5] Li, Z.; Parr, B. T.; Davies, H. M. L. Highly Stereoselective C–C Bond Formation by Rhodium-Catalyzed Tandem Ylide Formation/[2,3]-Sigmatropic Rearrangement between Donor/Acceptor Carbenoids and Chiral Allylic Alcohols. *J. Am. Chem. Soc.* **2012**, *134*, 10942–10946.
- [6] Fegyverneki, D.; Kolozsvári, N.; Molnár, D.; Egyed, O.; Holczbauer, T.; Soos, T. Size-Exclusion Borane-Catalyzed Domino 1,3-Allylic/Reductive Ireland–Claisen Rearrangements: Impact of the Electronic and Structural Parameters on the 1,3-Allylic Shift Aptitude. *Chem. Eur. J.* **2019**, *25*, 2179–2183.
- [7] Yasukawa, T.; Miyamura, H.; Kobayashi, S. Polymer-Incarcerated Chiral Rh/Ag Nanoparticles for Asymmetric 1,4-Addition Reactions of Arylboronic Acids to Enones: Remarkable Effects of Bimetallic Structure on Activity and Metal Leaching. *J. Am. Chem. Soc.* **2012**, *134*, 16963–16966.
- [8] Ogawa, T.; Ruddy, A. J.; Sydora, O. L.; Tradiotto, M.; Turculet, L. Cobalt- and Iron-Catalyzed Isomerization–Hydroboration of Branched Alkenes: Terminal Hydroboration with Pinacolborane and 1,3,2-Diazaborolanes. *Organometallics* **2017**, *36*, 417–423.
- [9] Jones, M. R.; Fast, C. D.; Schley, N. D. Iridium-Catalyzed sp<sup>3</sup> C–H Borylation in Hydrocarbon Solvent Enabled by 2,2-Dipyridylarylmethane Ligands. *J. Am. Chem. Soc.* **2020**, *142*, 6488–6492.

- [10] Higashino, M.; Ikeda, N.; Shinada, T.; Sakaguchi, K.; Ohfuné, Y. Stereoselective anti-S<sub>N</sub>2' Mitsunobu Reaction  $\alpha$ -Hydroxy- $\alpha$ -alkenylsilane. *Tetrahedron Lett.* **2011**, 52, 422–425.
- [11] Kutsumura, N.; Matsubara, Y.; Niwa, K.; Ito, A.; Saito, T. One-Pot Method for Regioselective Bromination and Sequential Carbon–Carbon Bond-Forming Reactions of Allylic Alcohol Derivatives. *Eur. J. Org. Chem.* **2013**, 3337–3346.
- [12] Camp, A. M.; Kita, M. R.; Blackburn, P. T.; Dodge, H. M.; Chen, C. H.; Miller, A. J. M. Selecting Double Bond Positions with a Single Cation-Responsive Iridium Olefin Isomerization Catalyst. *J. Am. Chem. Soc.* **2021**, 143, 2792–2800.
- [13] Yamasaki, Y.; Kumagai, T.; Kanno, S.; Kakiuchi, F.; Kochi, T. Selective Long-Distance Isomerization of Terminal Alkenes via Nondissociative Chain Walking. *J. Org. Chem.* **2018**, 83, 9322–9333.
- [14] Gao, J.; Ni, J.; Yu, R.; Cheng, G.; Fang, X. Ni-Catalyzed Isomerization–Hydrocyanation Tandem Reactions: Access to Linear Nitriles from Aliphatic Internal Olefins. *Org. Lett.* **2021**, 23, 486–490.
- [15] Bellemin, L. S.; Osborn, P. N. Isomerization of Allylic Silyl Ethers Catalyzed by ReO<sub>3</sub>(OSiR<sub>3</sub>) Complexes. *Tetrahedron Lett.* **2000**, 41, 1549–1552.
- [16] Wata, C.; Hashimoto, T. Organiodine-Catalyzed Enantioselective Intermolecular Oxyamination of Alkenes. *J. Am. Chem. Soc.* **2021**, 143, 1745–1751.
- [17] Comito, R. J.; Finelli, F. G.; MacMillan, D. W. C. Enantioselective Intramolecular Aldehyde  $\alpha$ -Alkylation with Simple Olefins: Direct Access to Homo-Ene Products. *J. Am. Chem. Soc.* **2013**, 135, 9358–9361.
- [18] Gauthier, R. L.; Elford, T. G.; Aggarwal, V. K. Atene Complexes of Secondary Boronic Esters as Chiral Organometallic-Type Nucleophiles for Asymmetric Synthesis. *J. Am. Chem. Soc.* **2011**, 133, 16794–16797.
- [19] Liu, Z.; Ni, H.; Zeng, T.; Engle, K. M. Catalytic Carbo- and Aminoboration of Alkenyl Carbonyl Compounds via Five- and Six-Membered Palladacycles. *J. Am. Chem. Soc.* **2018**, 140, 3223–3227.
- [20] Bonet, A.; Odachowski, M.; Leonori, D.; Essafi, S.; Aggarwal, V. K. Enantiospecific *sp*<sup>2</sup>–*sp*<sup>3</sup> Coupling of Secondary and Tertiary Boronic Esters. *Nat. Chem.* **2014**, 6, 584–589.
- [21] Sadhu, K. M.; Matteson, D. S. (Chloromethyl)lithium: Efficient Generation and Capture by Boronic Esters and a Simple Preparation of Diisopropyl

- (Chloromethyl)boronate. *Organometallics* **1985**, 4, 1687–1689.
- [22] Liu, X.; Zhu, Q.; Chen, D.; Wang, L.; Jin, L.; Liu, C. Aminoazanium of DABCO: An Amination Reagent for Alkyl and Aryl Pinacol Boronates. *Angew. Chem., Int. Ed.* **2020**, 59, 2745–2749.
- [23] Yang, C. T.; Zhang, Z. Q.; Tajuddin, H.; Wu, C. C.; Liang, J.; Liu, J. H.; Fu, Y.; Czyzewska, M.; Steel, P. G.; Marder, T. B.; Liu, L. Alkylboronic Esters from Copper-Catalyzed Borylation of Primary and Secondary Alkyl Halides and Pseudohalides. *Angew. Chem., Int. Ed.* **2012**, 51, 528–532.

# <sup>1</sup>H NMR and <sup>13</sup>C NMR Spectra

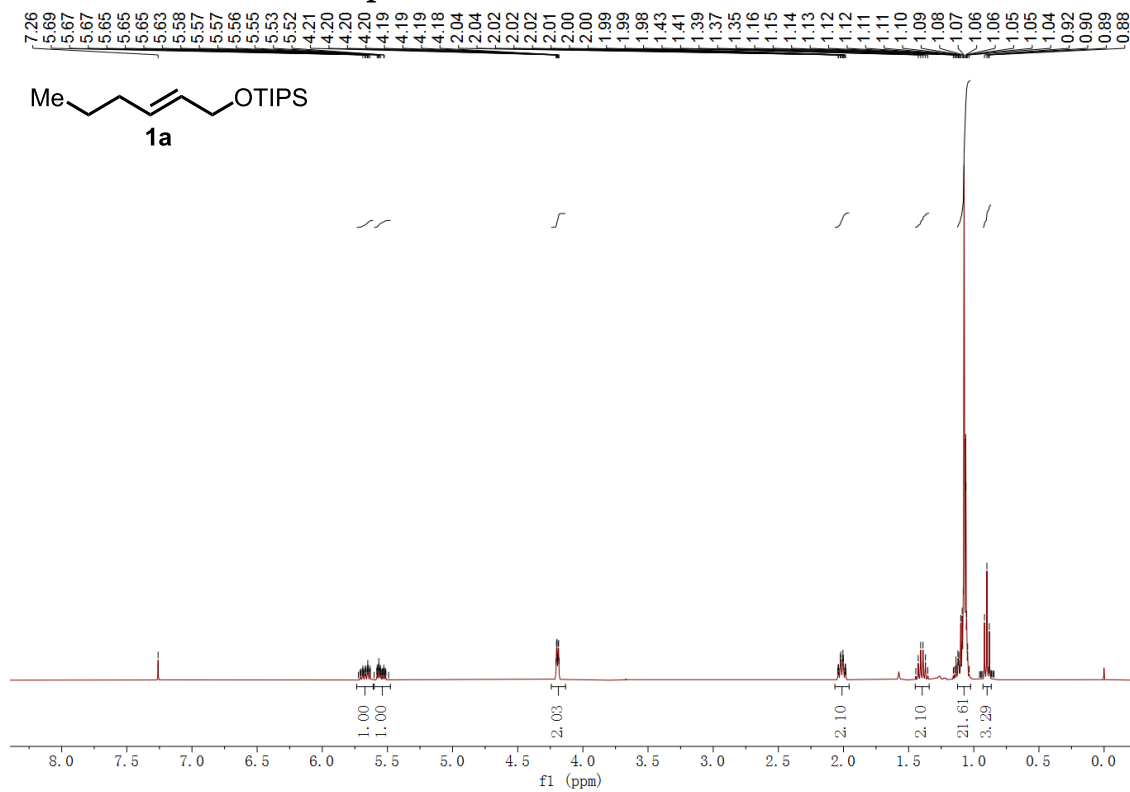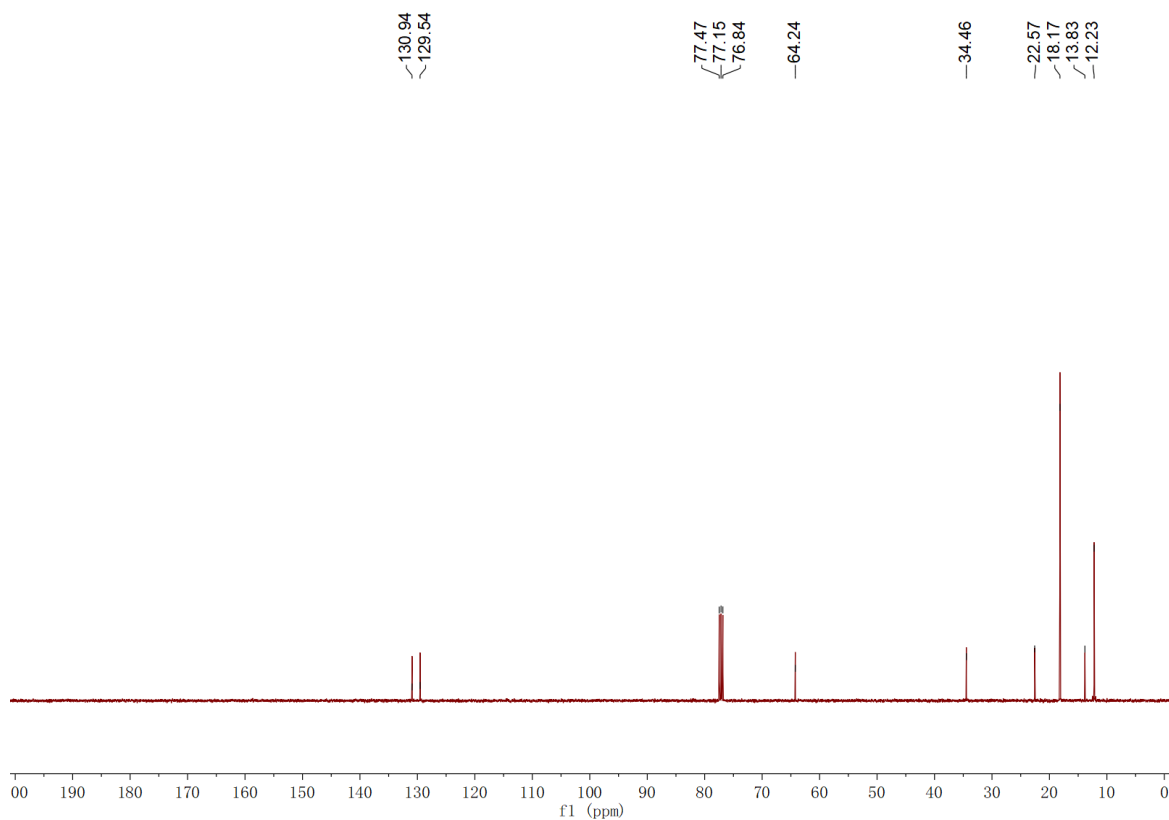

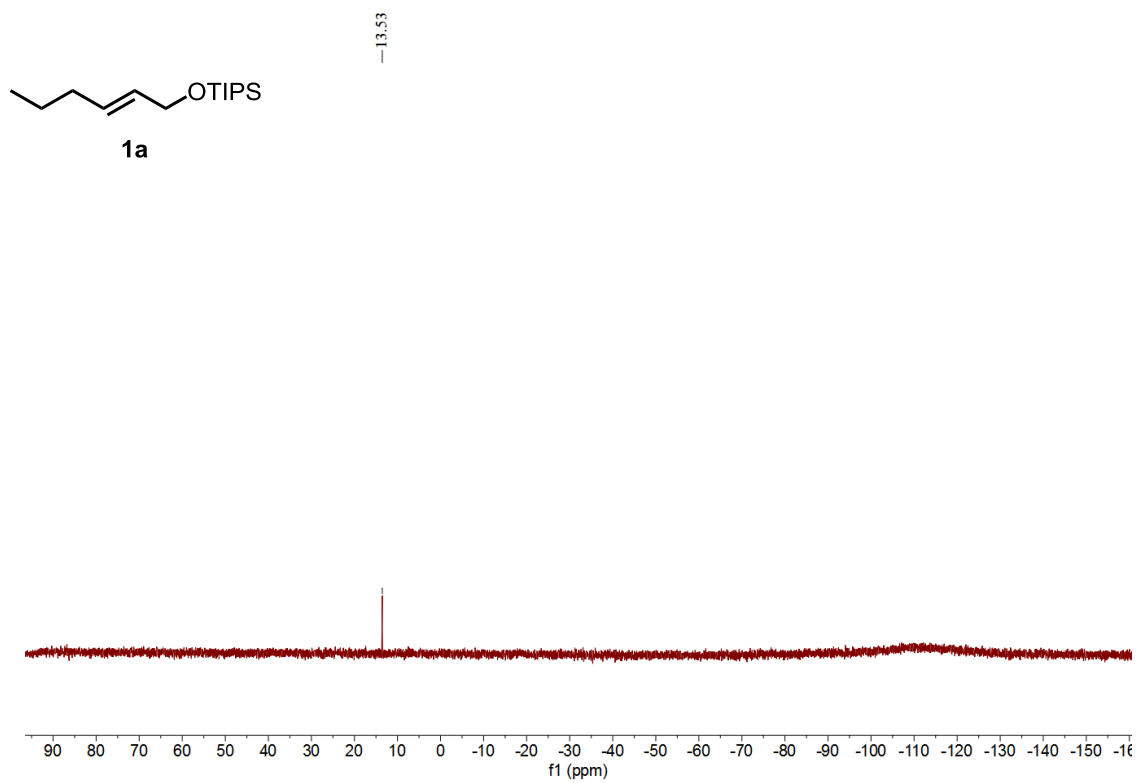

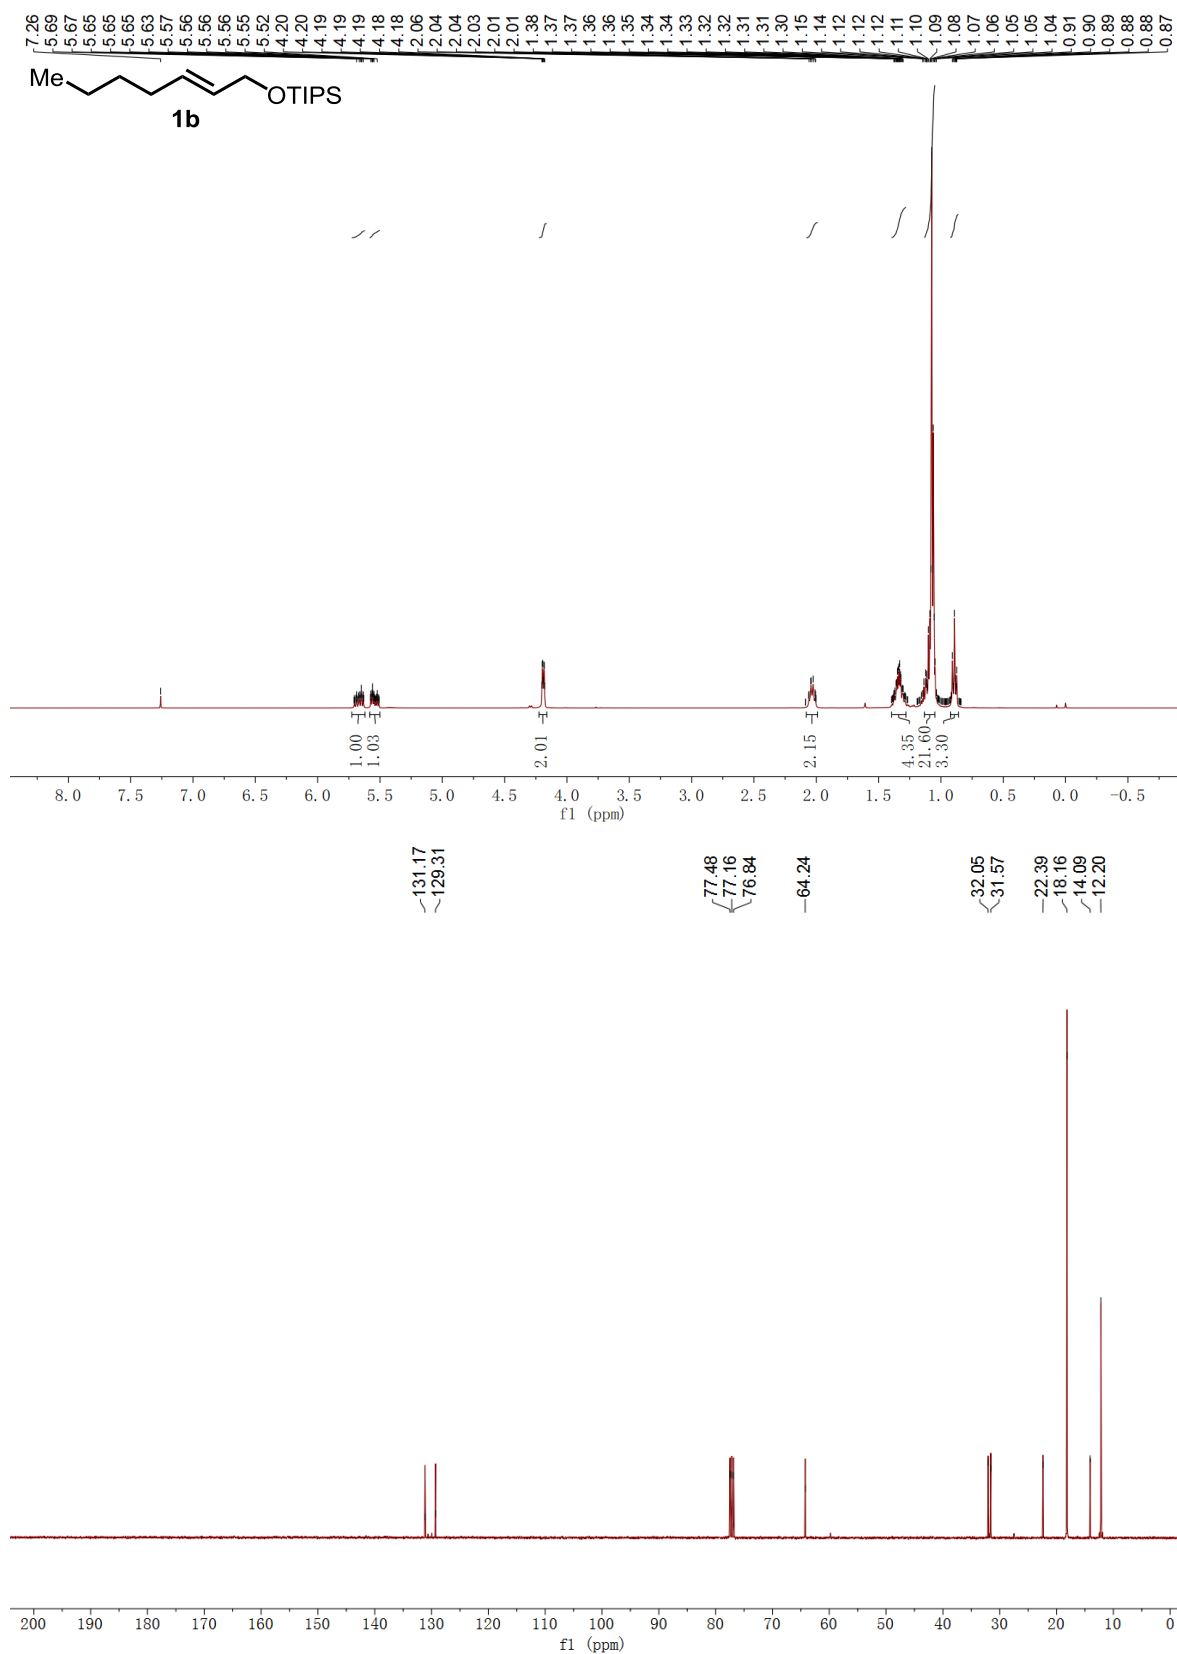

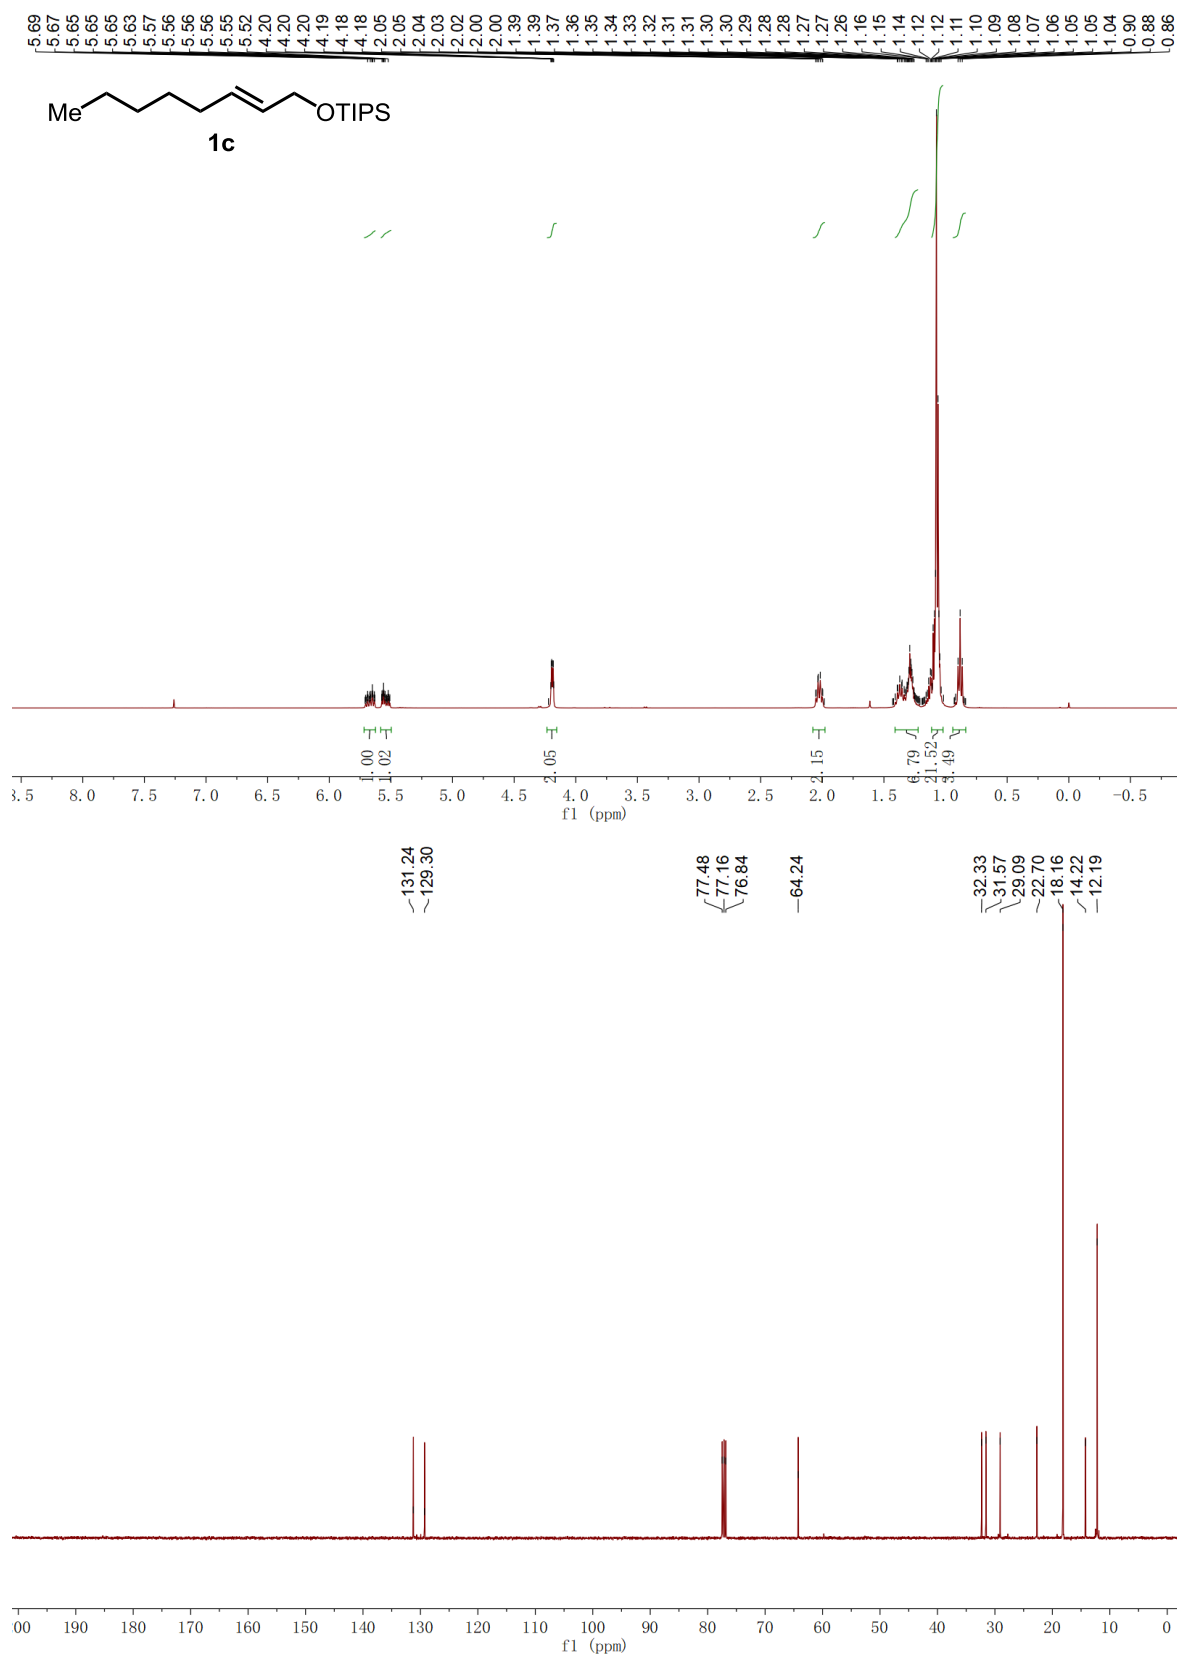

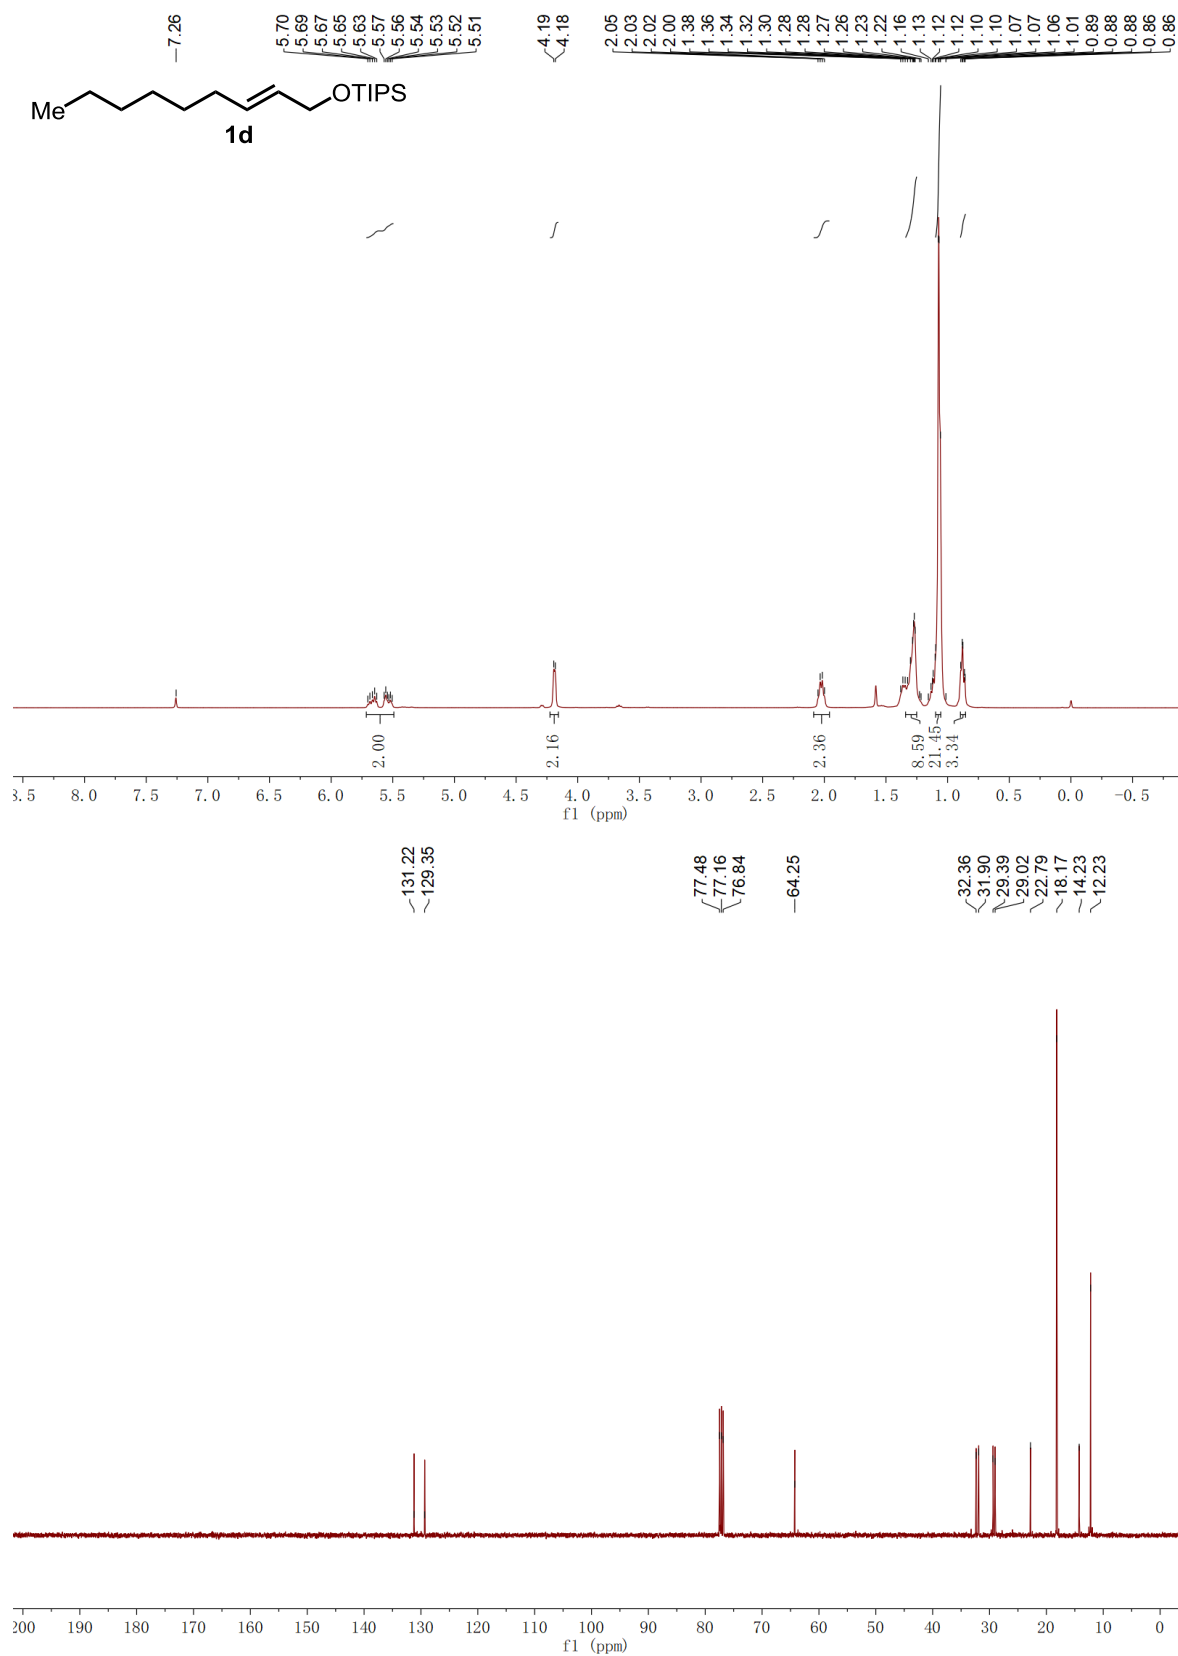



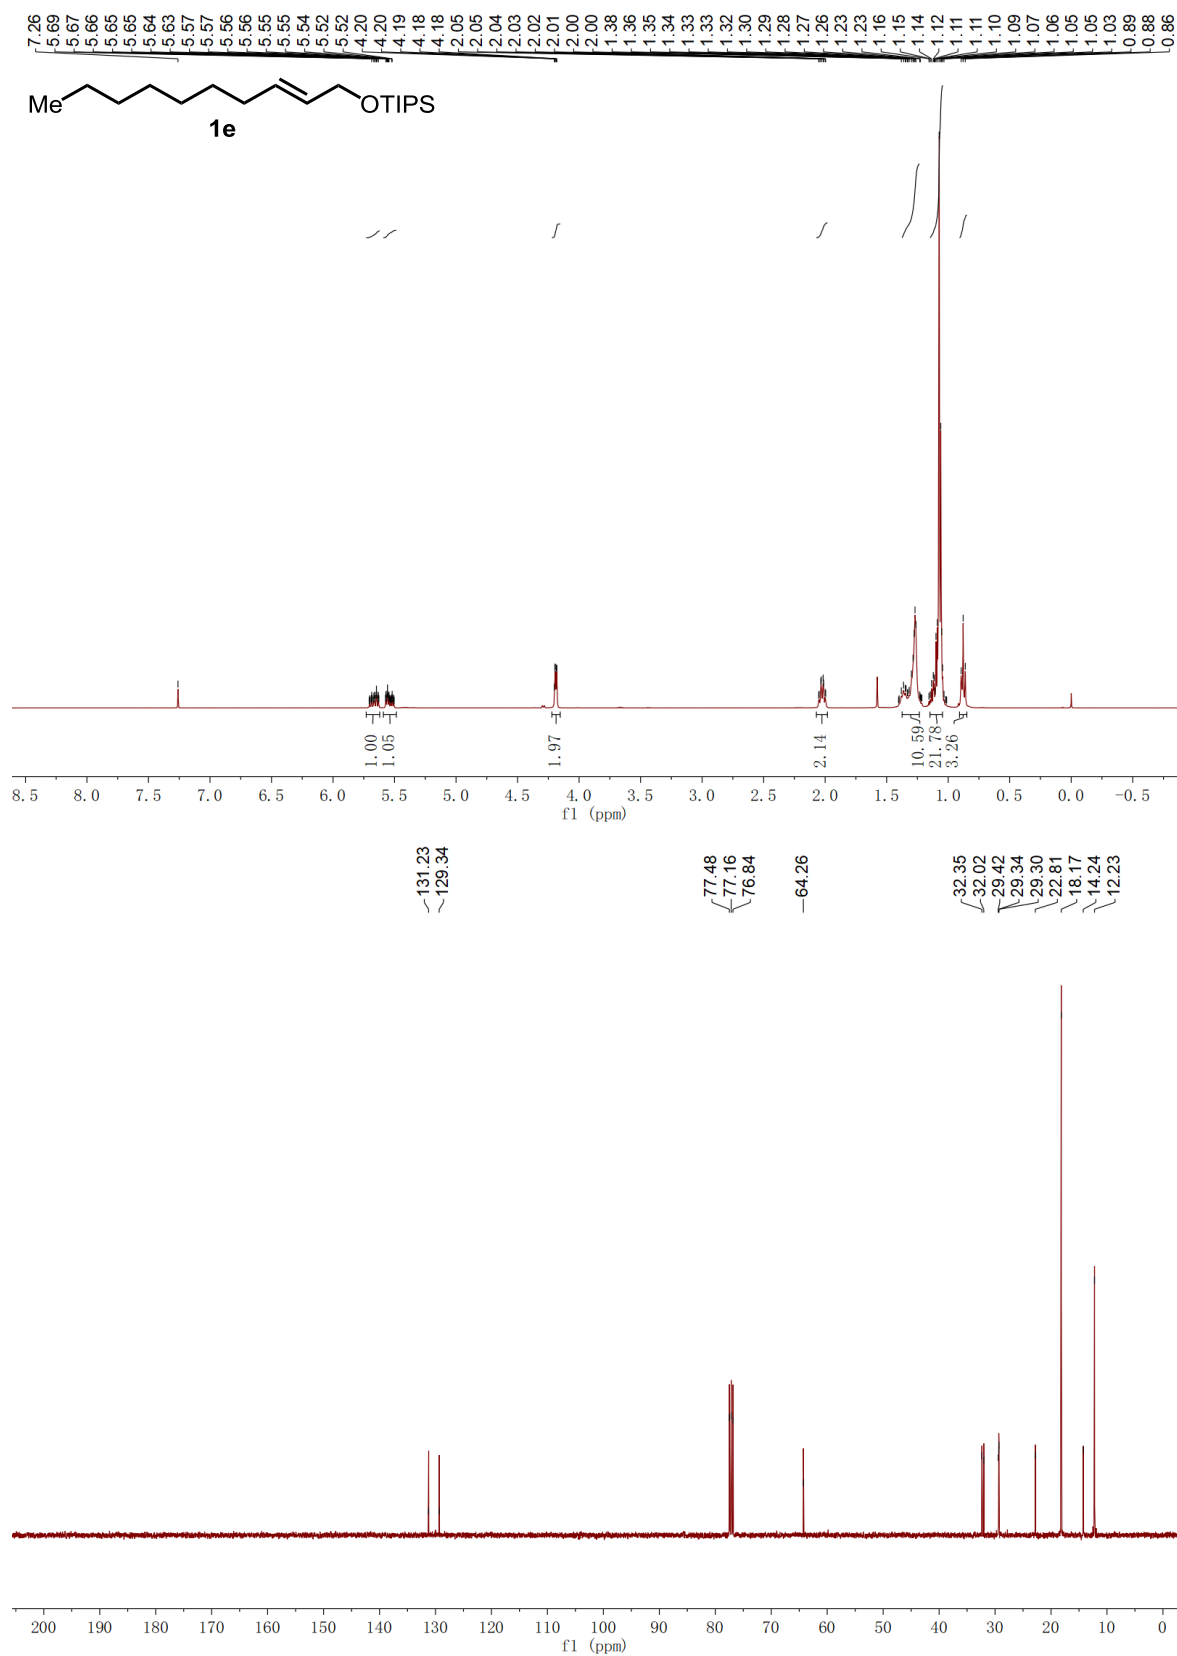

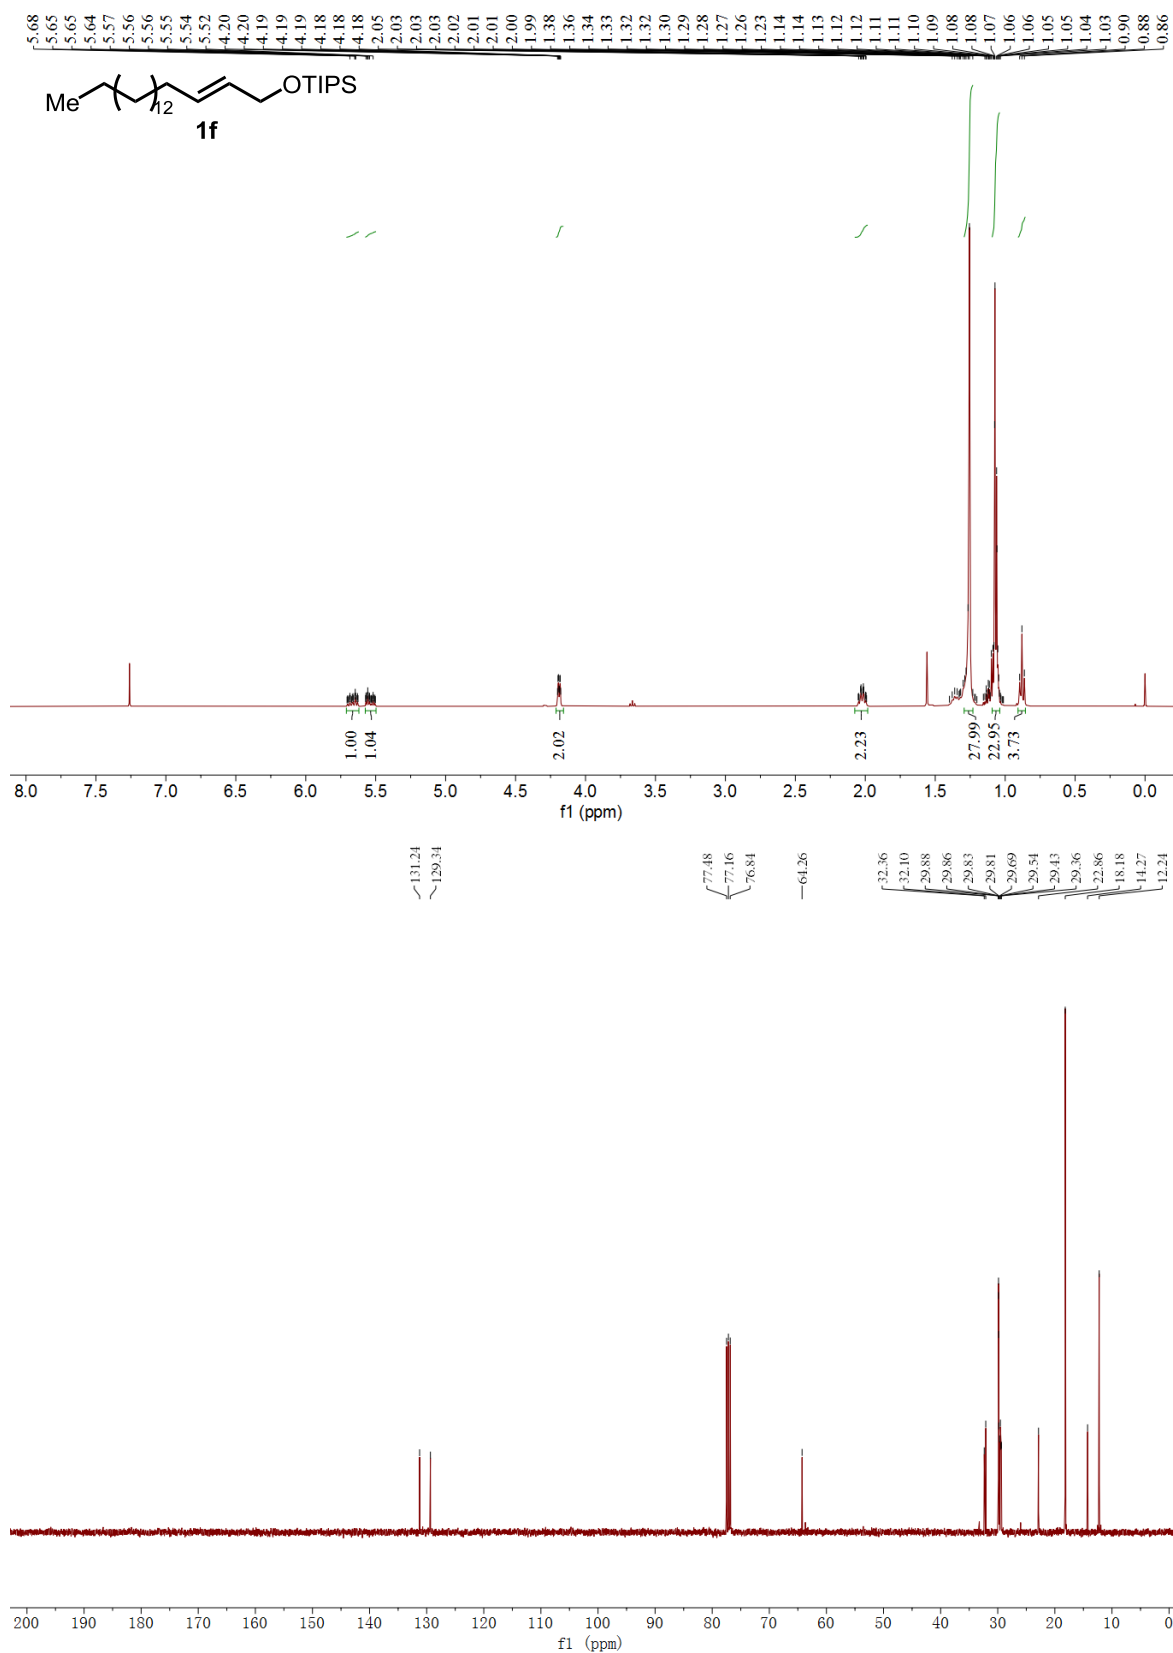



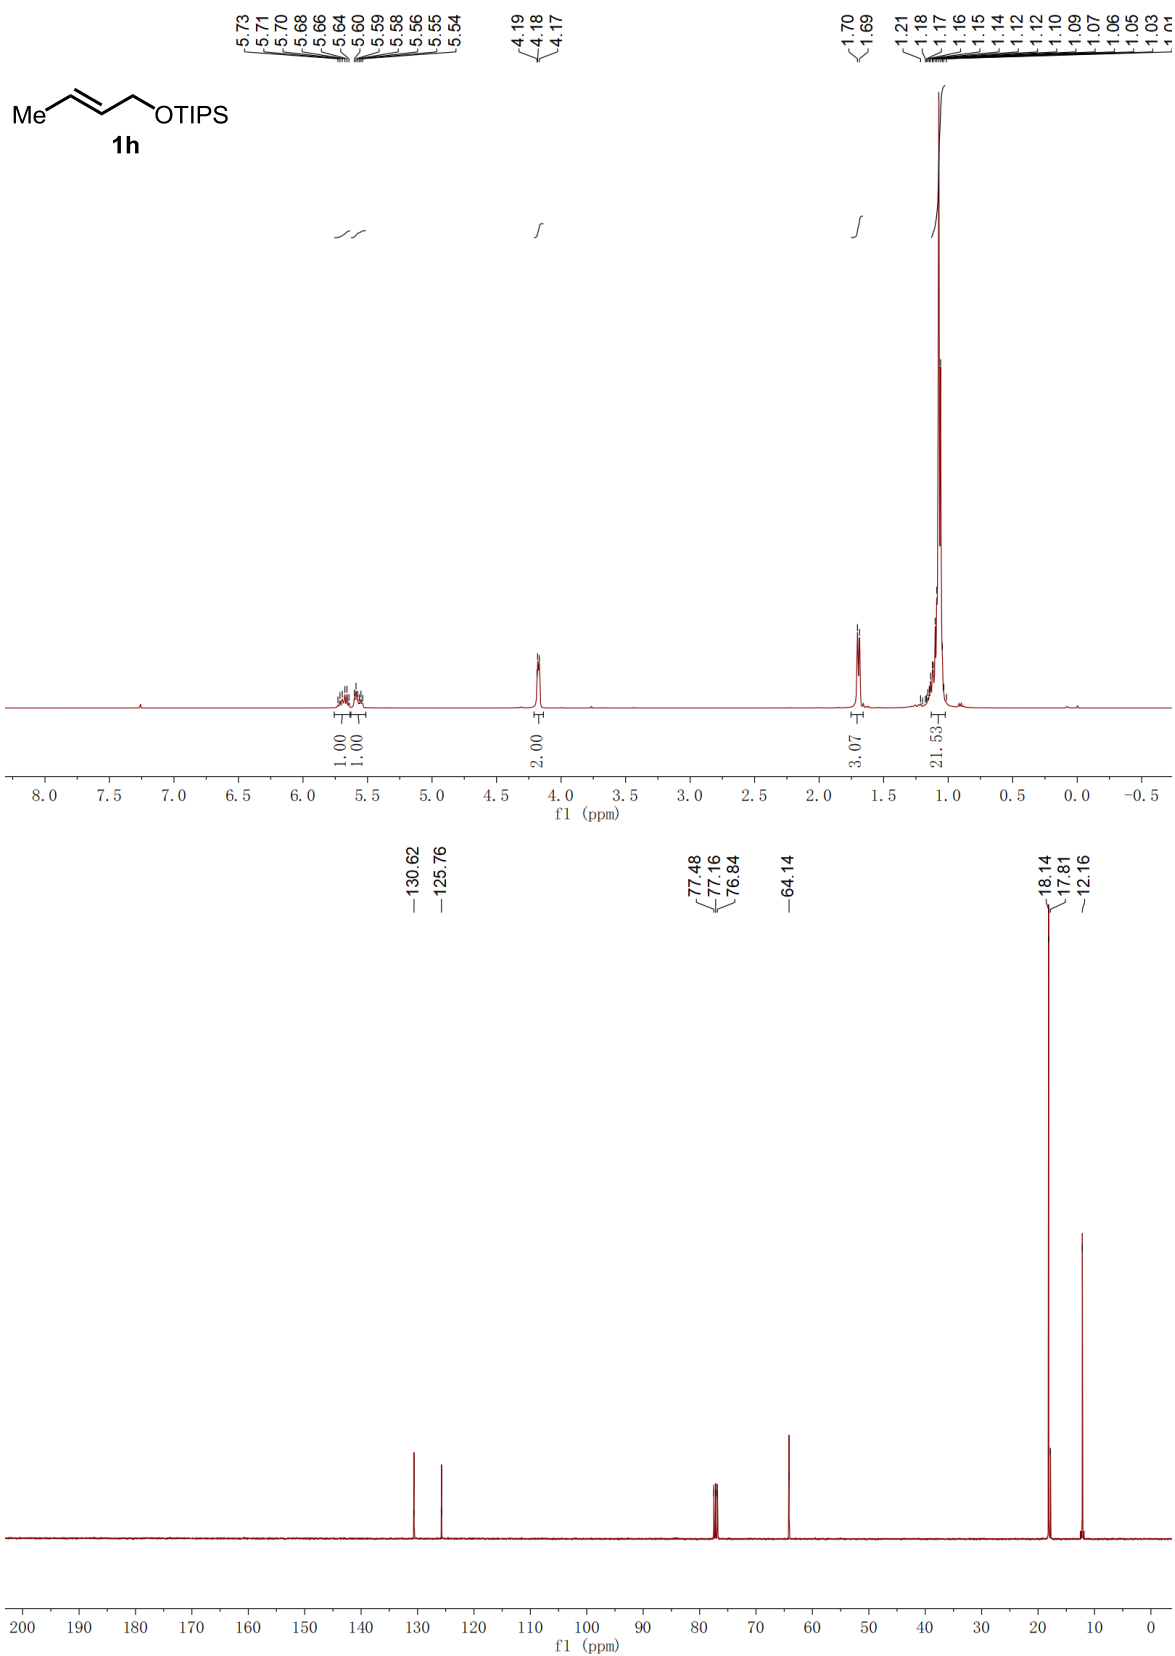

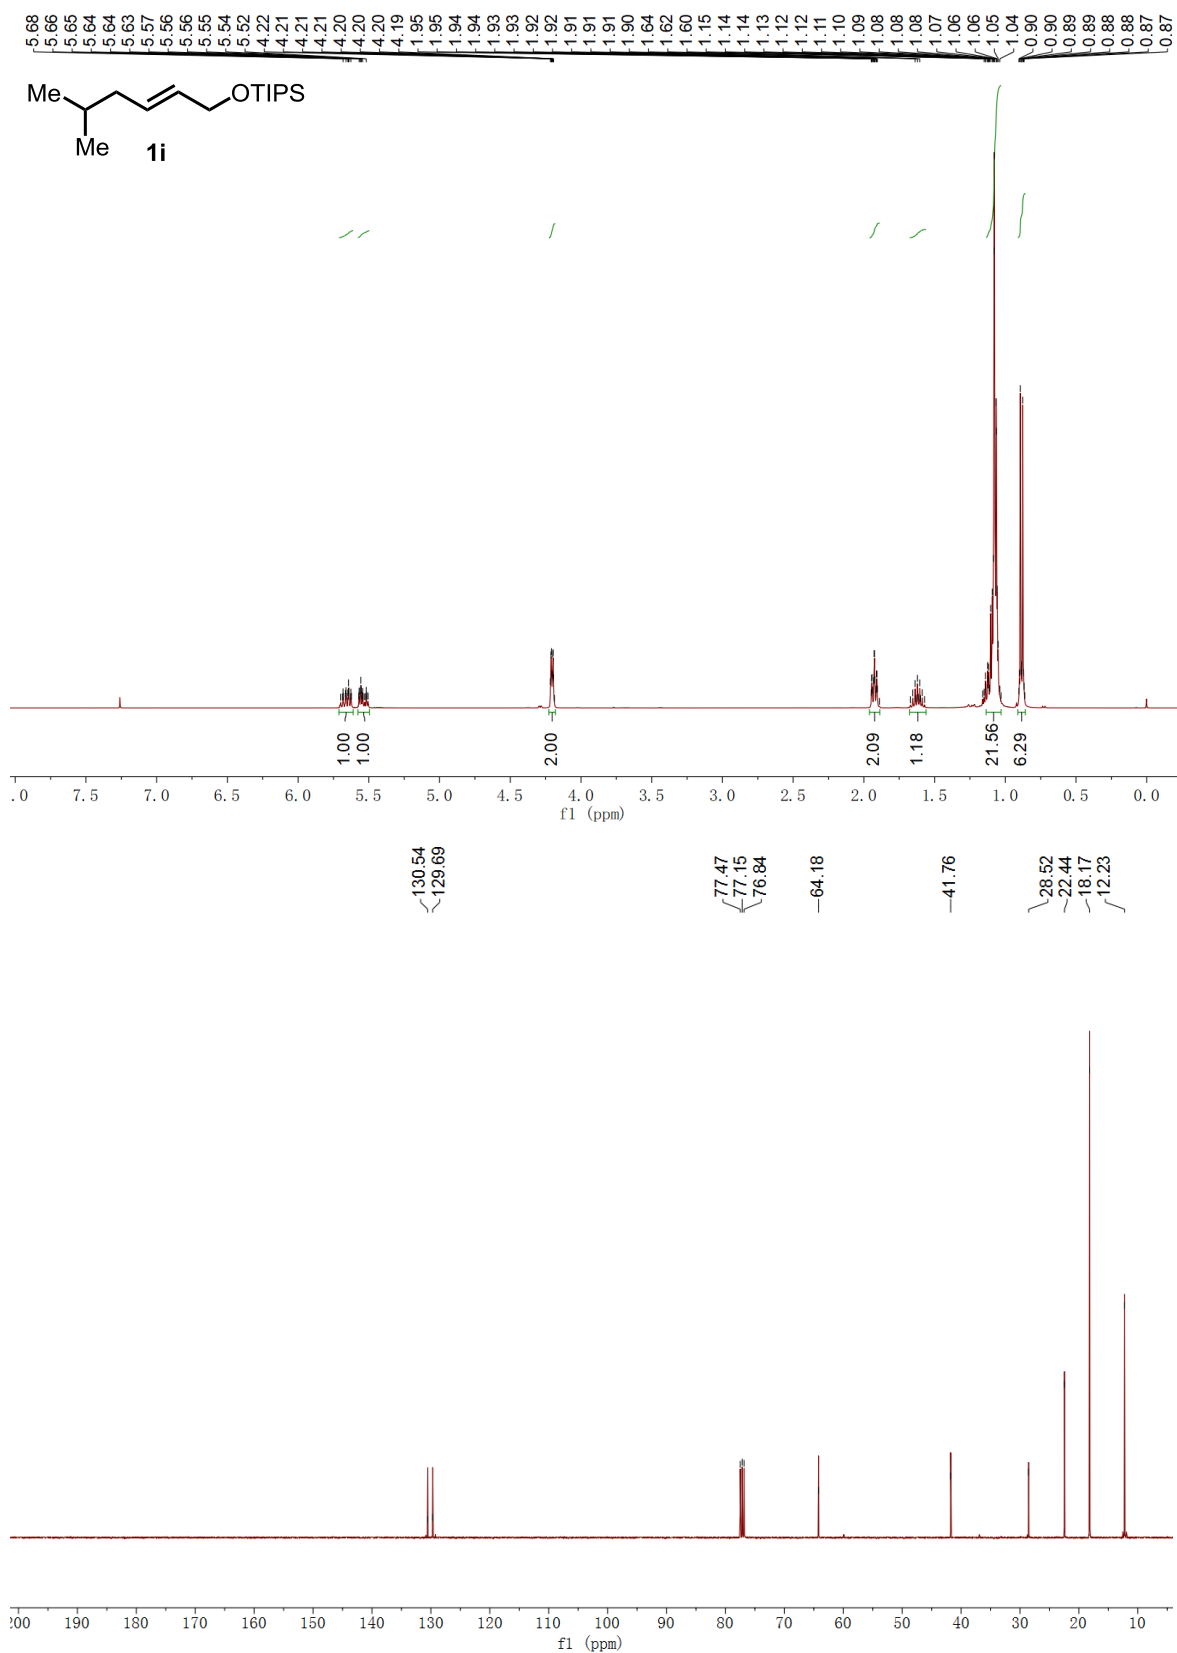

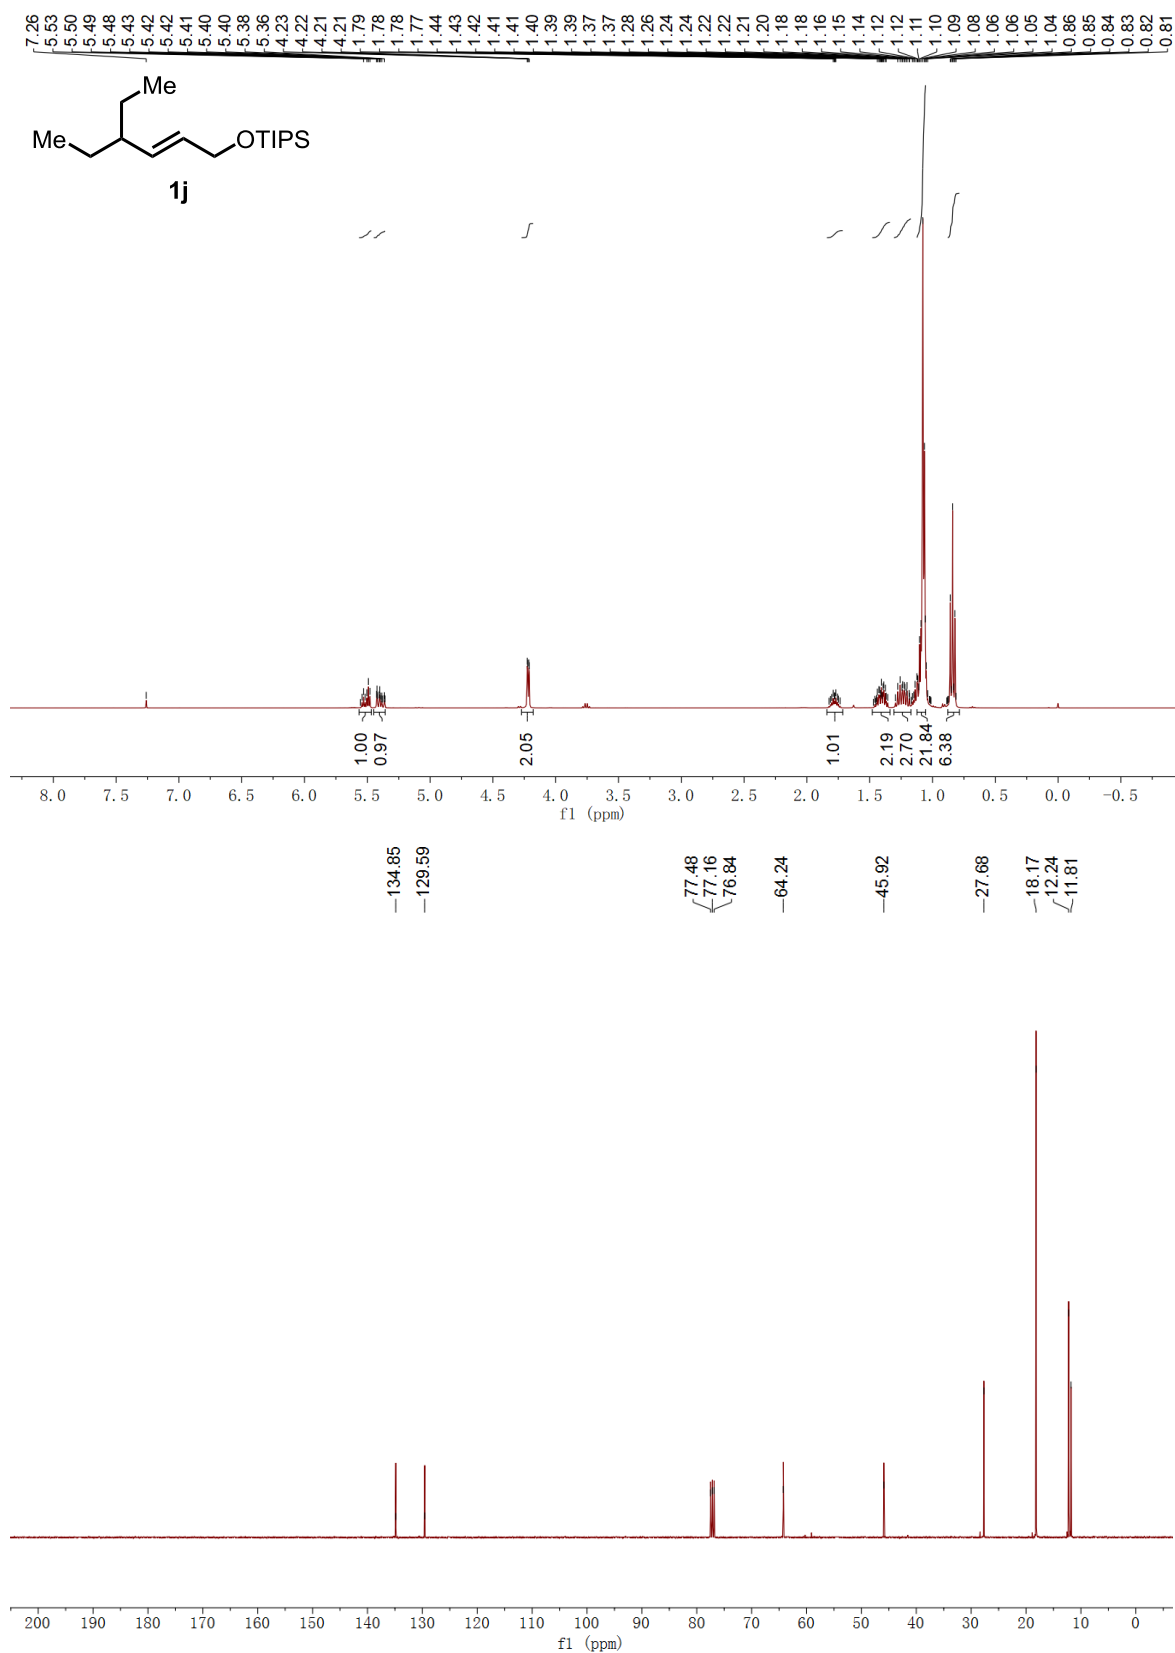



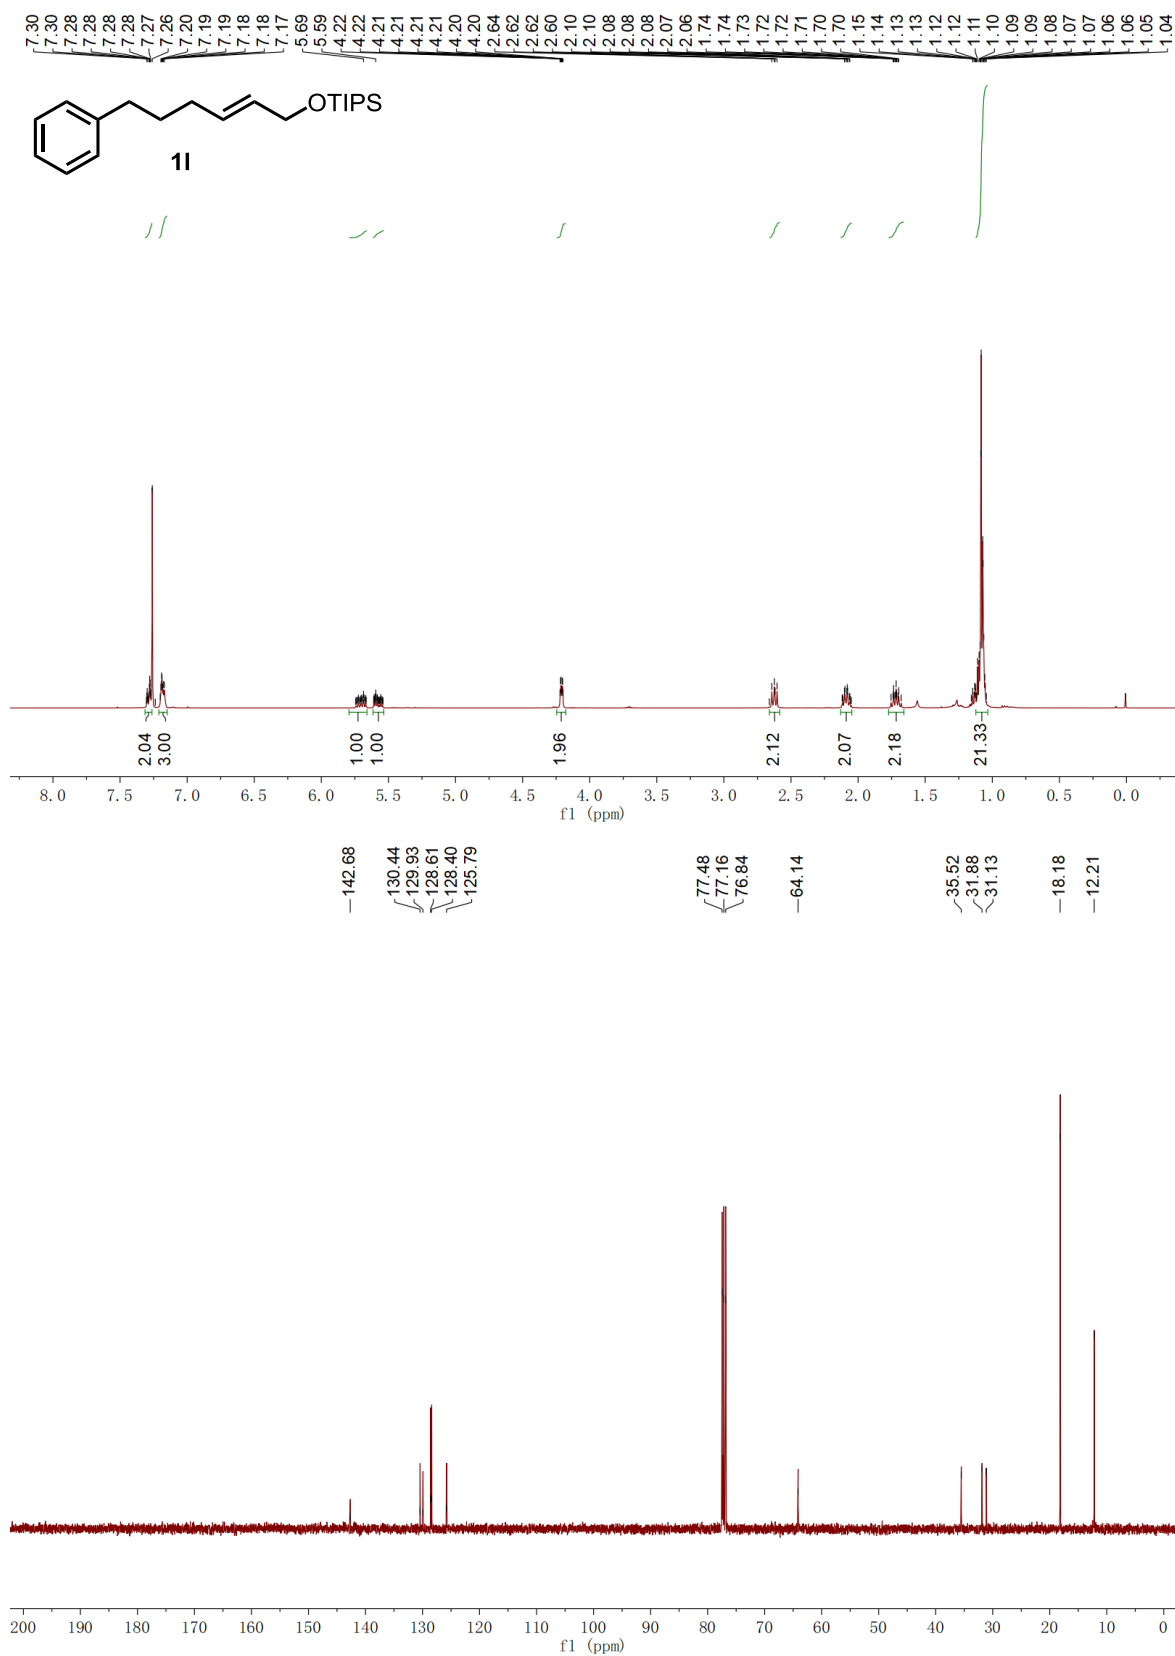



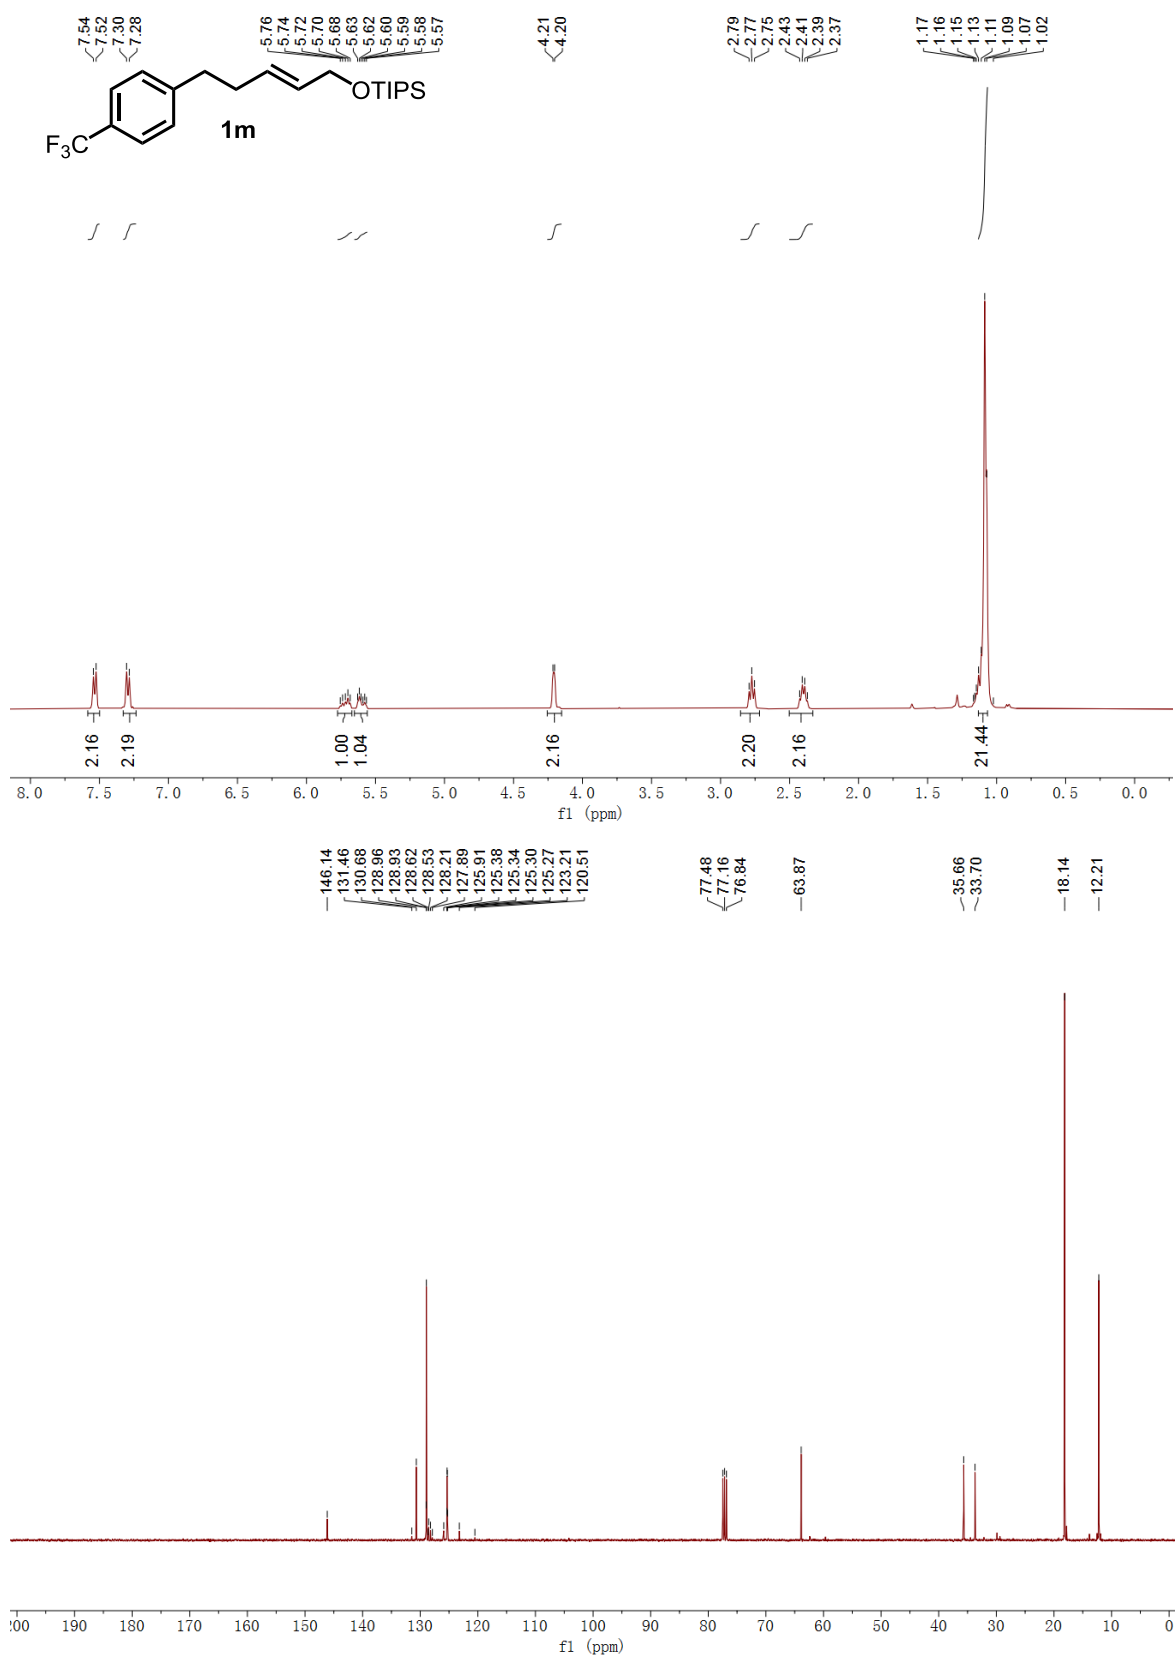

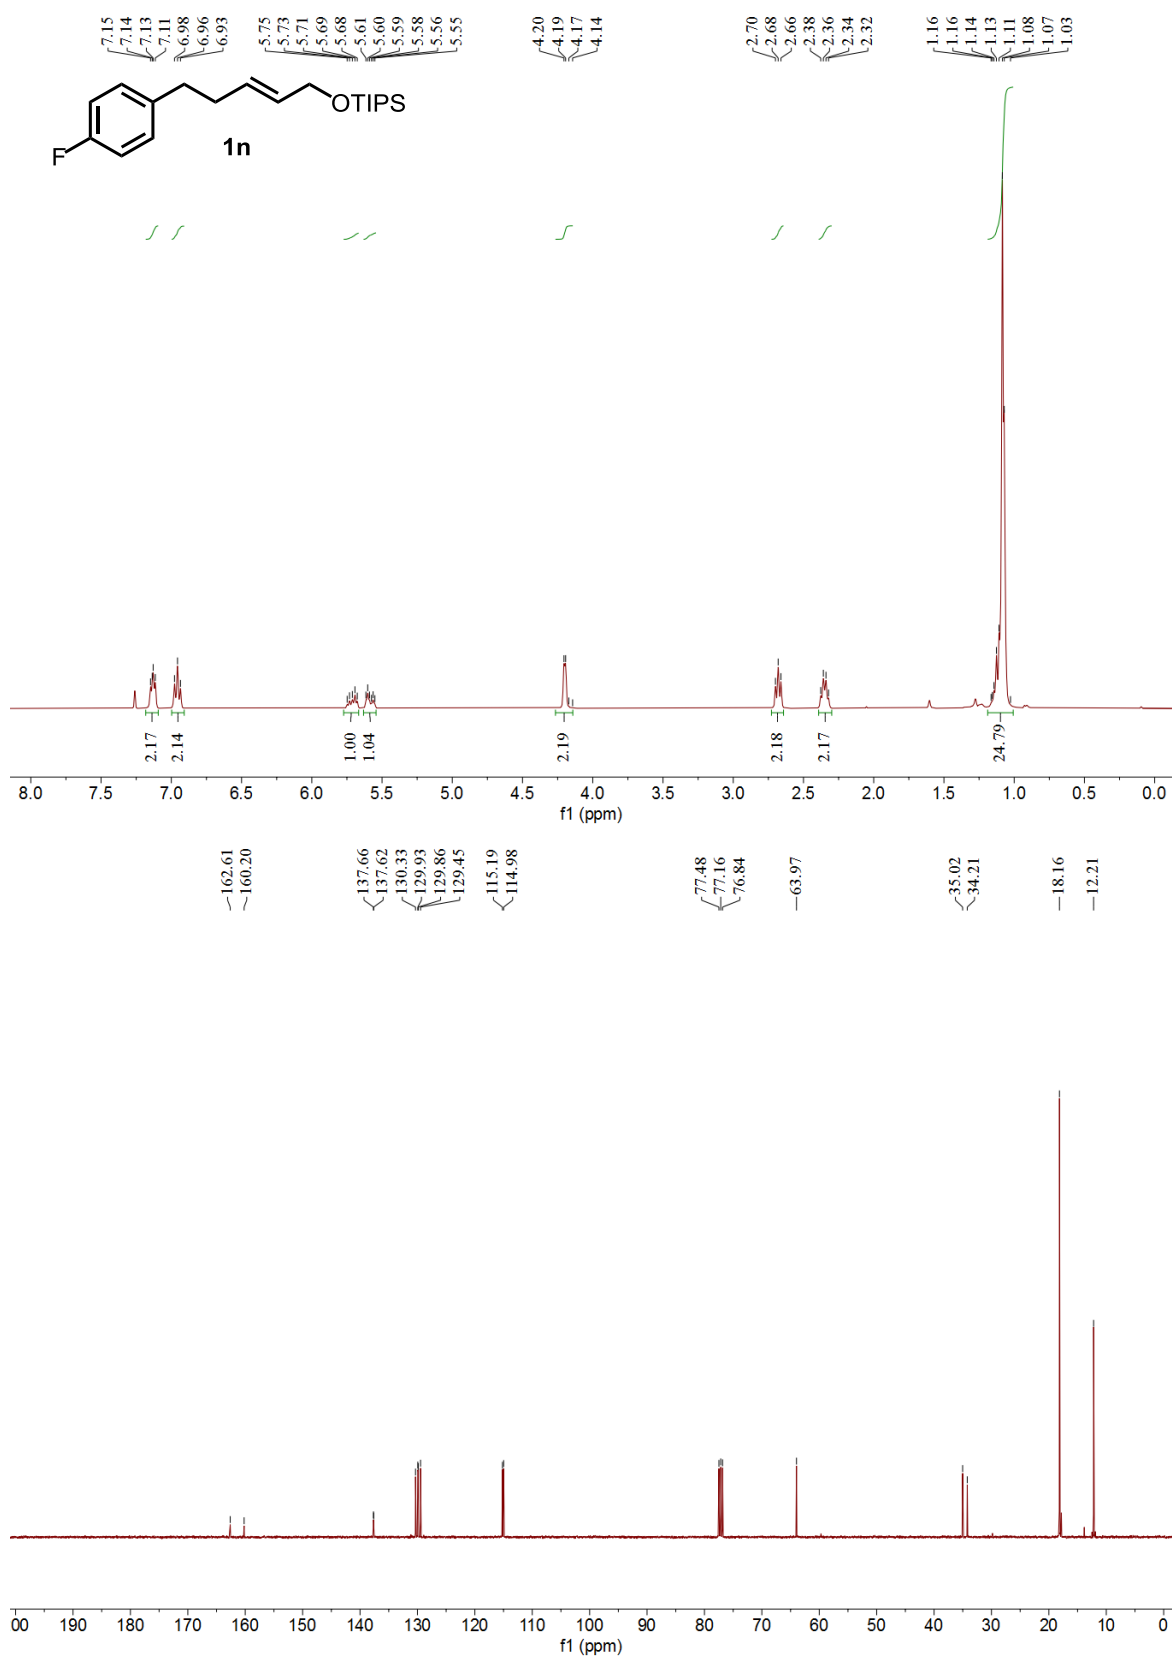

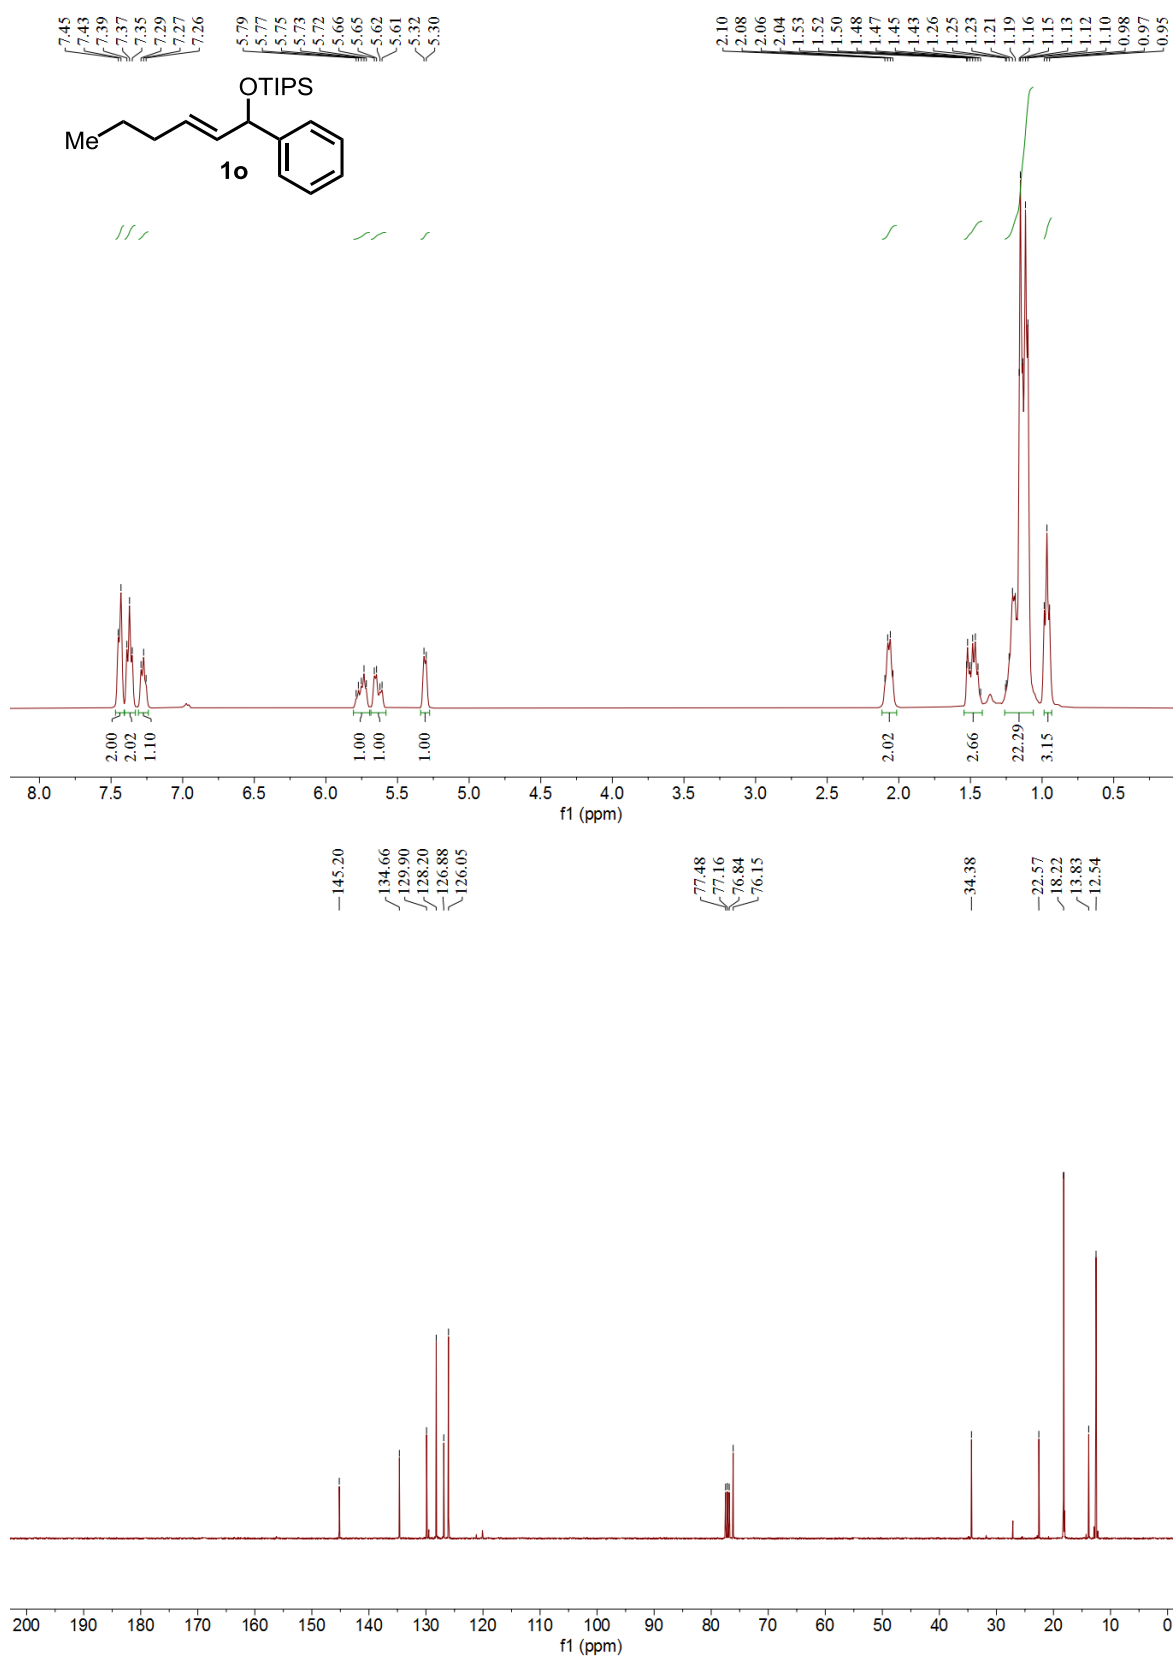

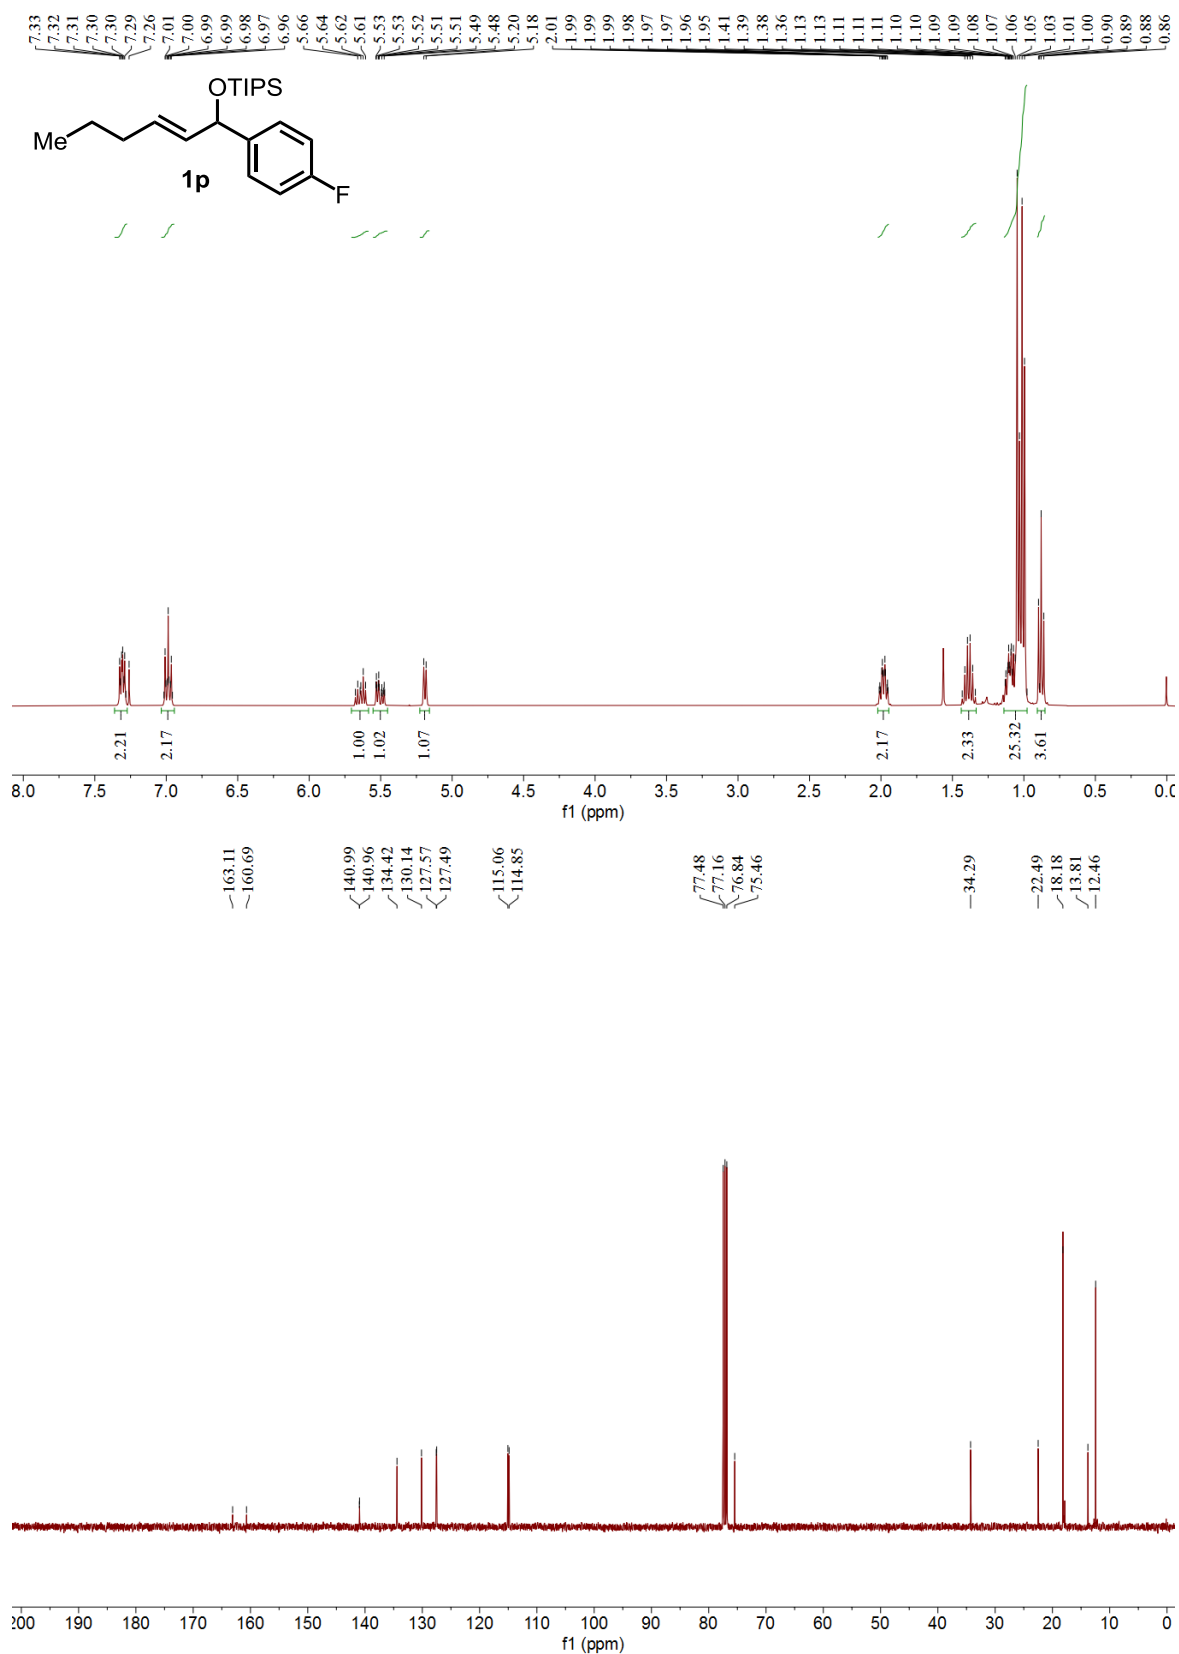

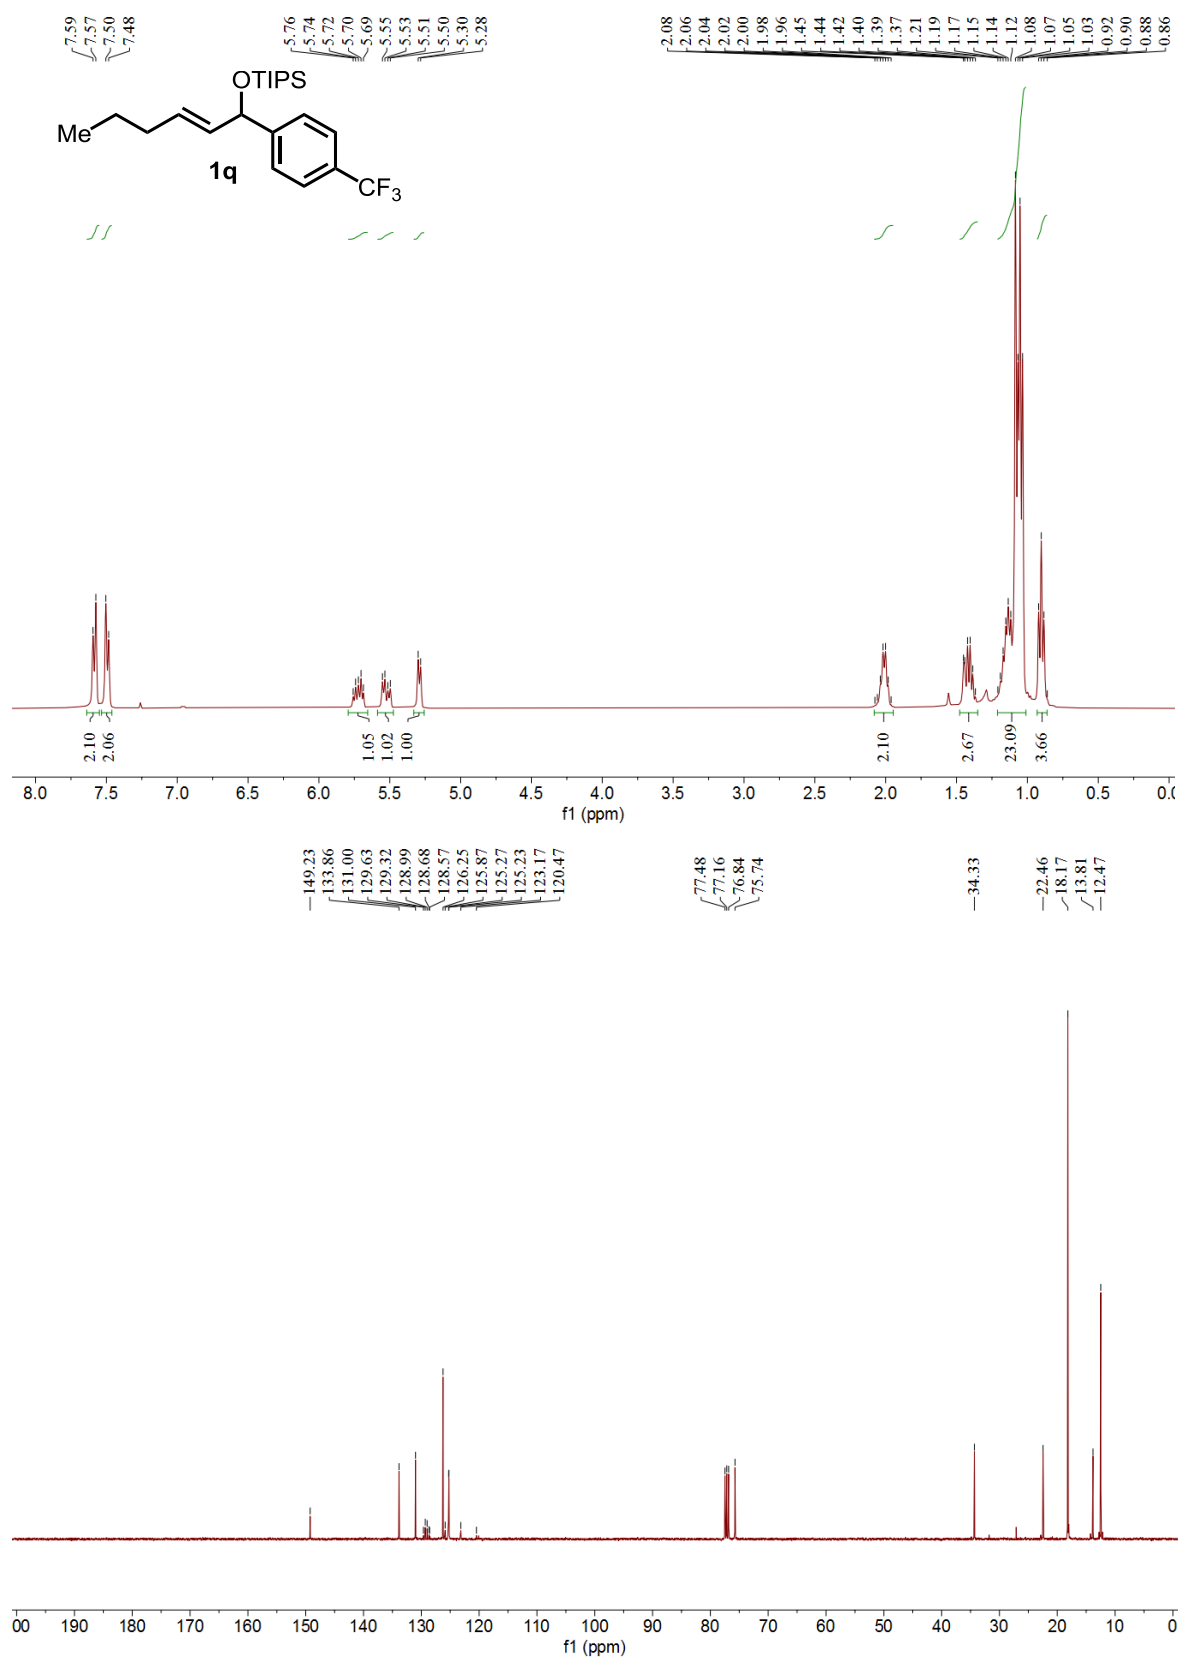

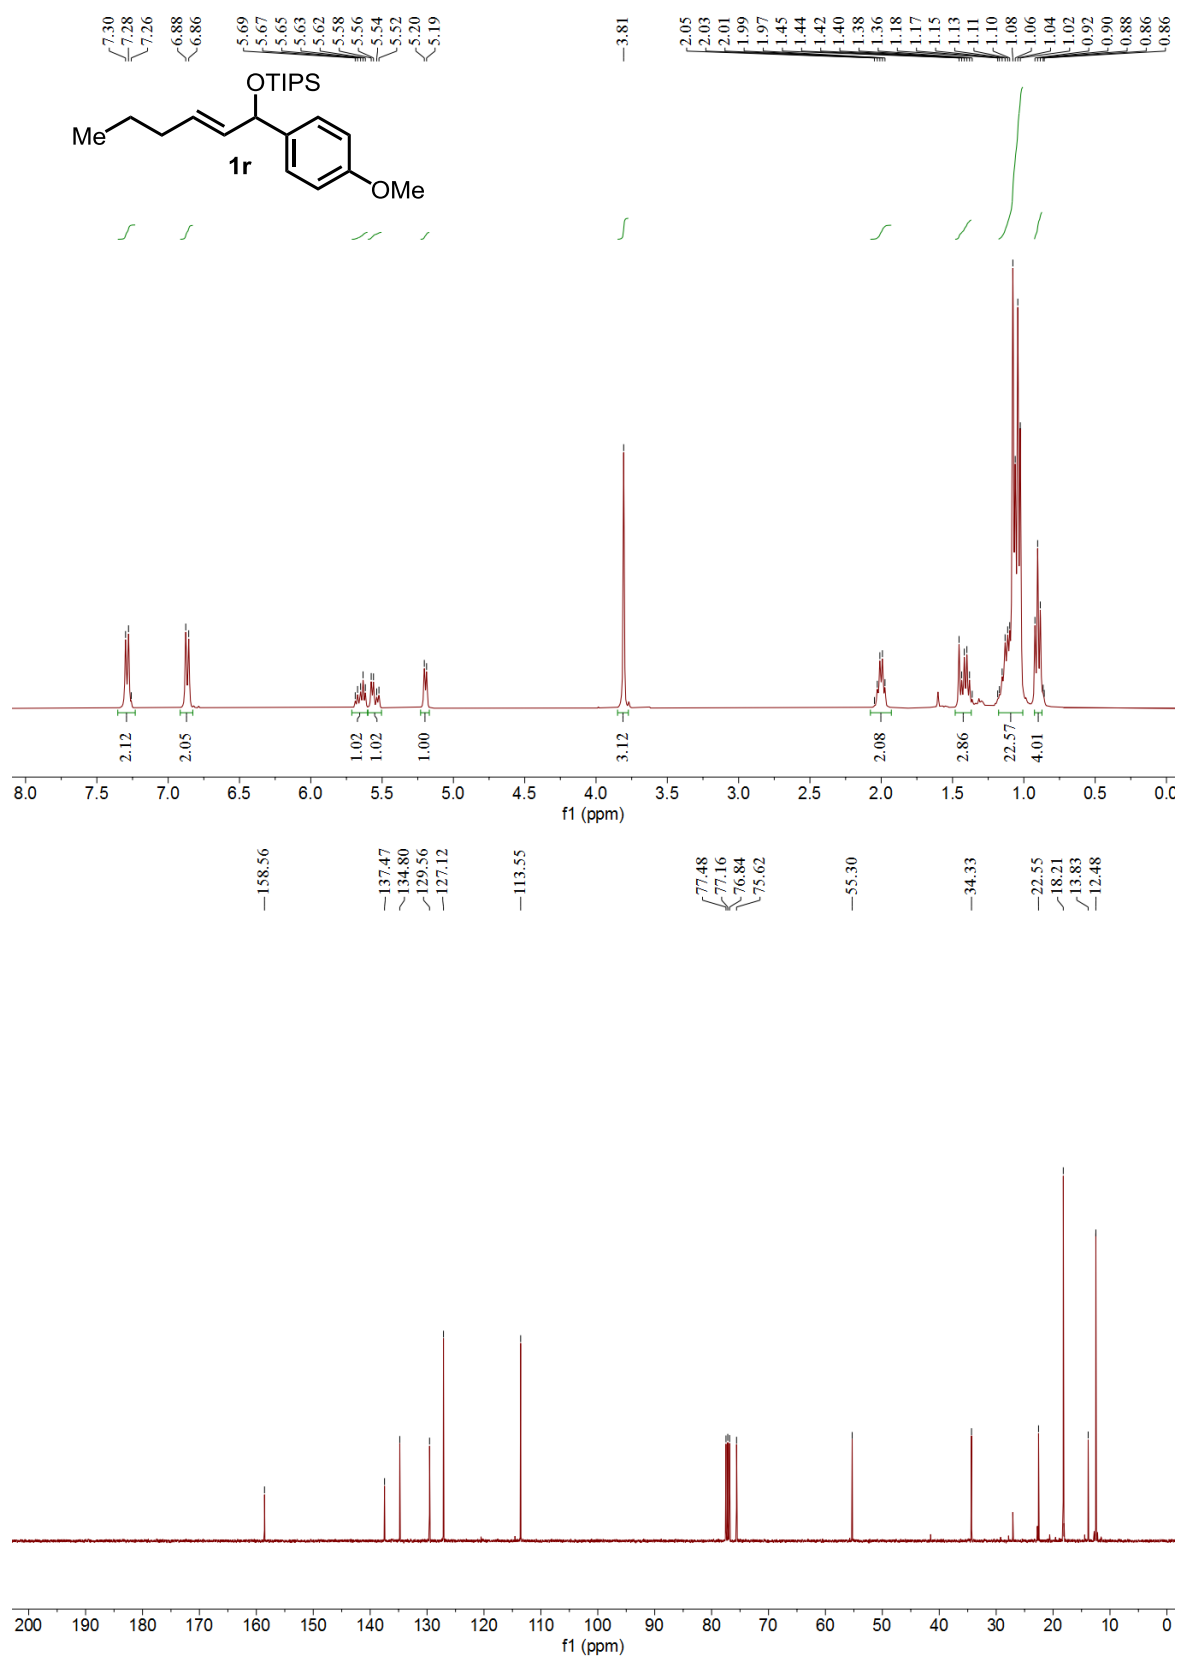

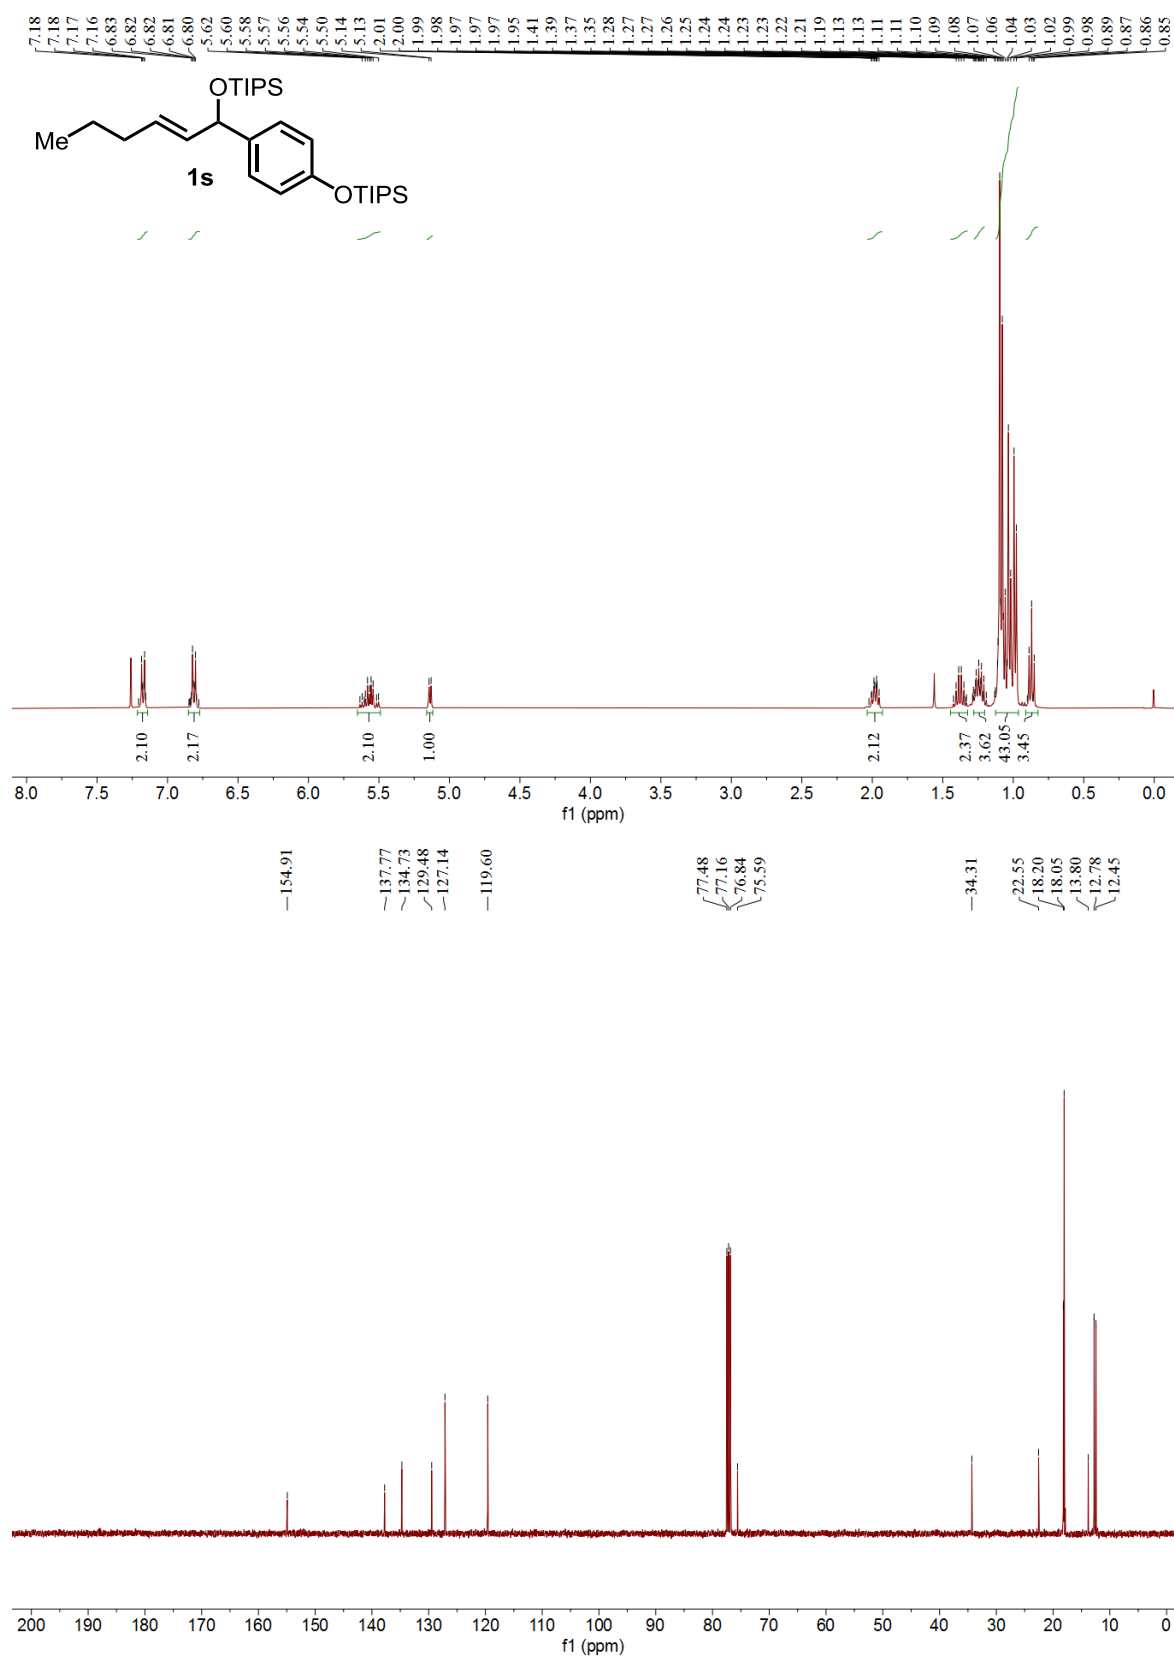

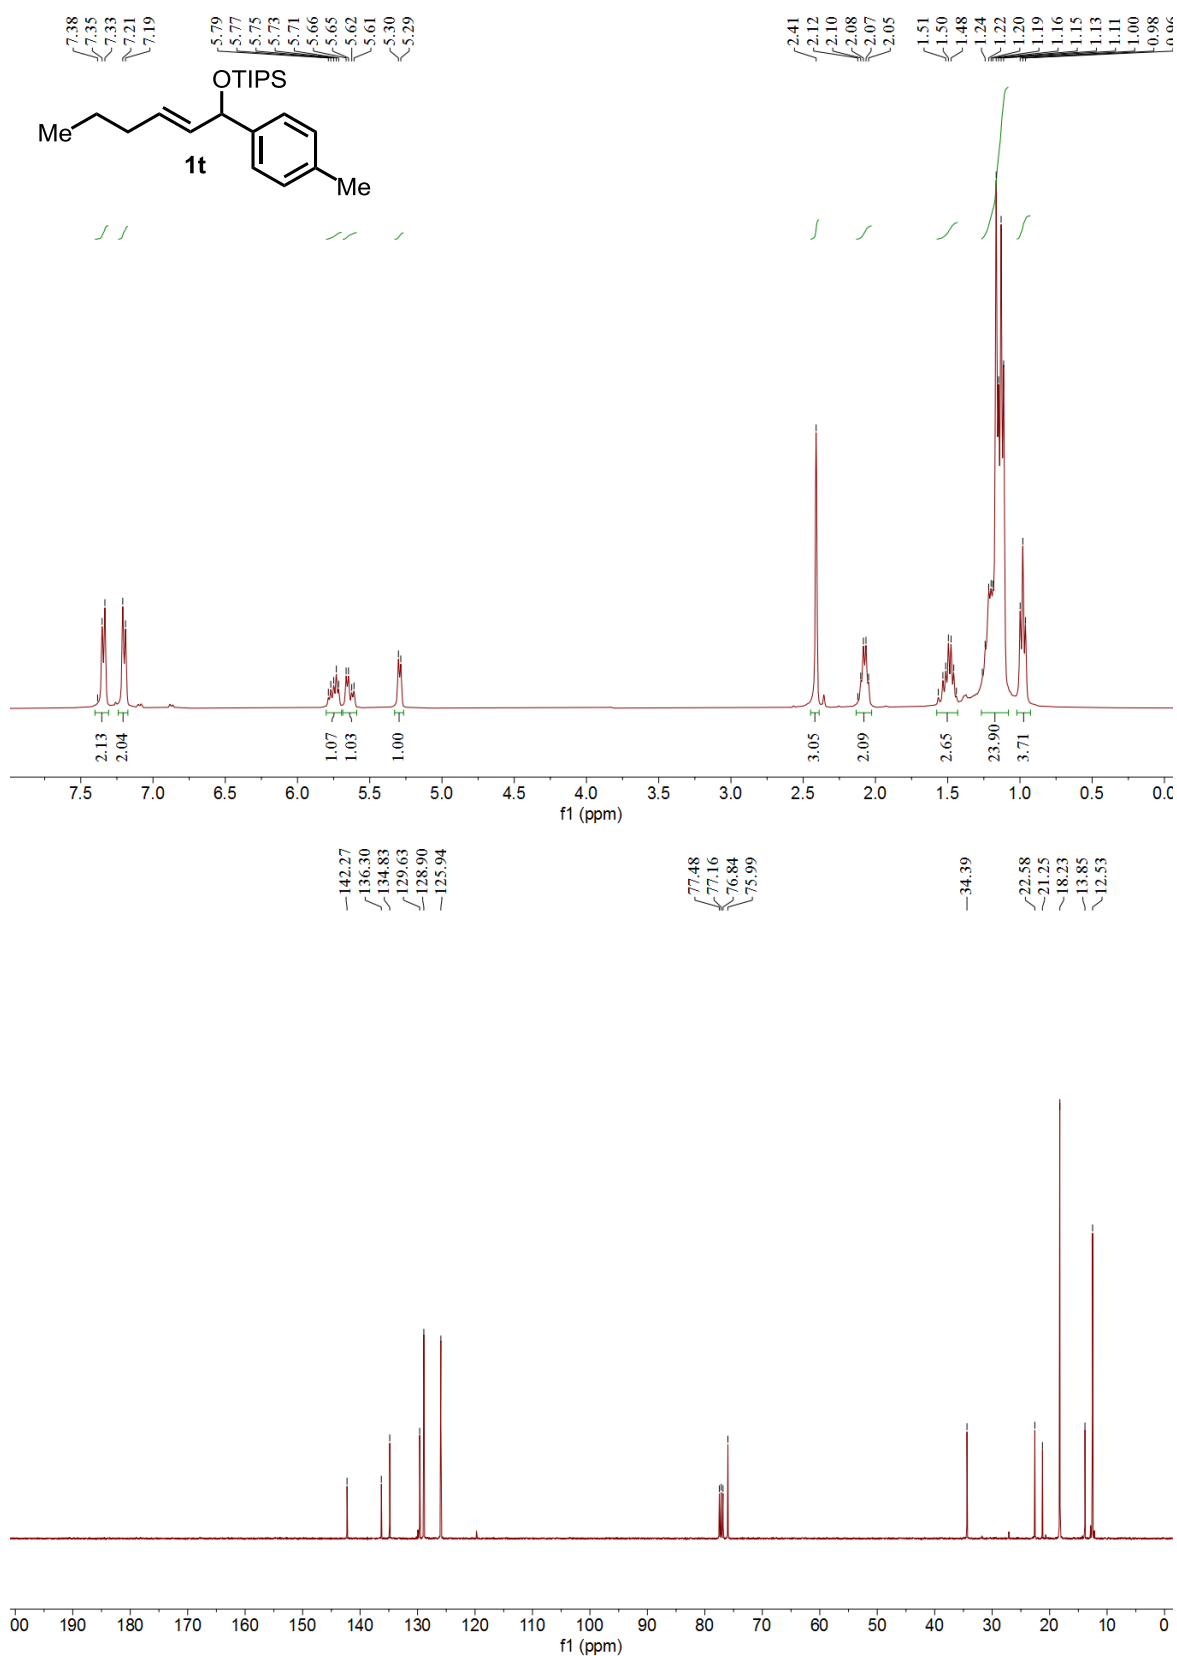



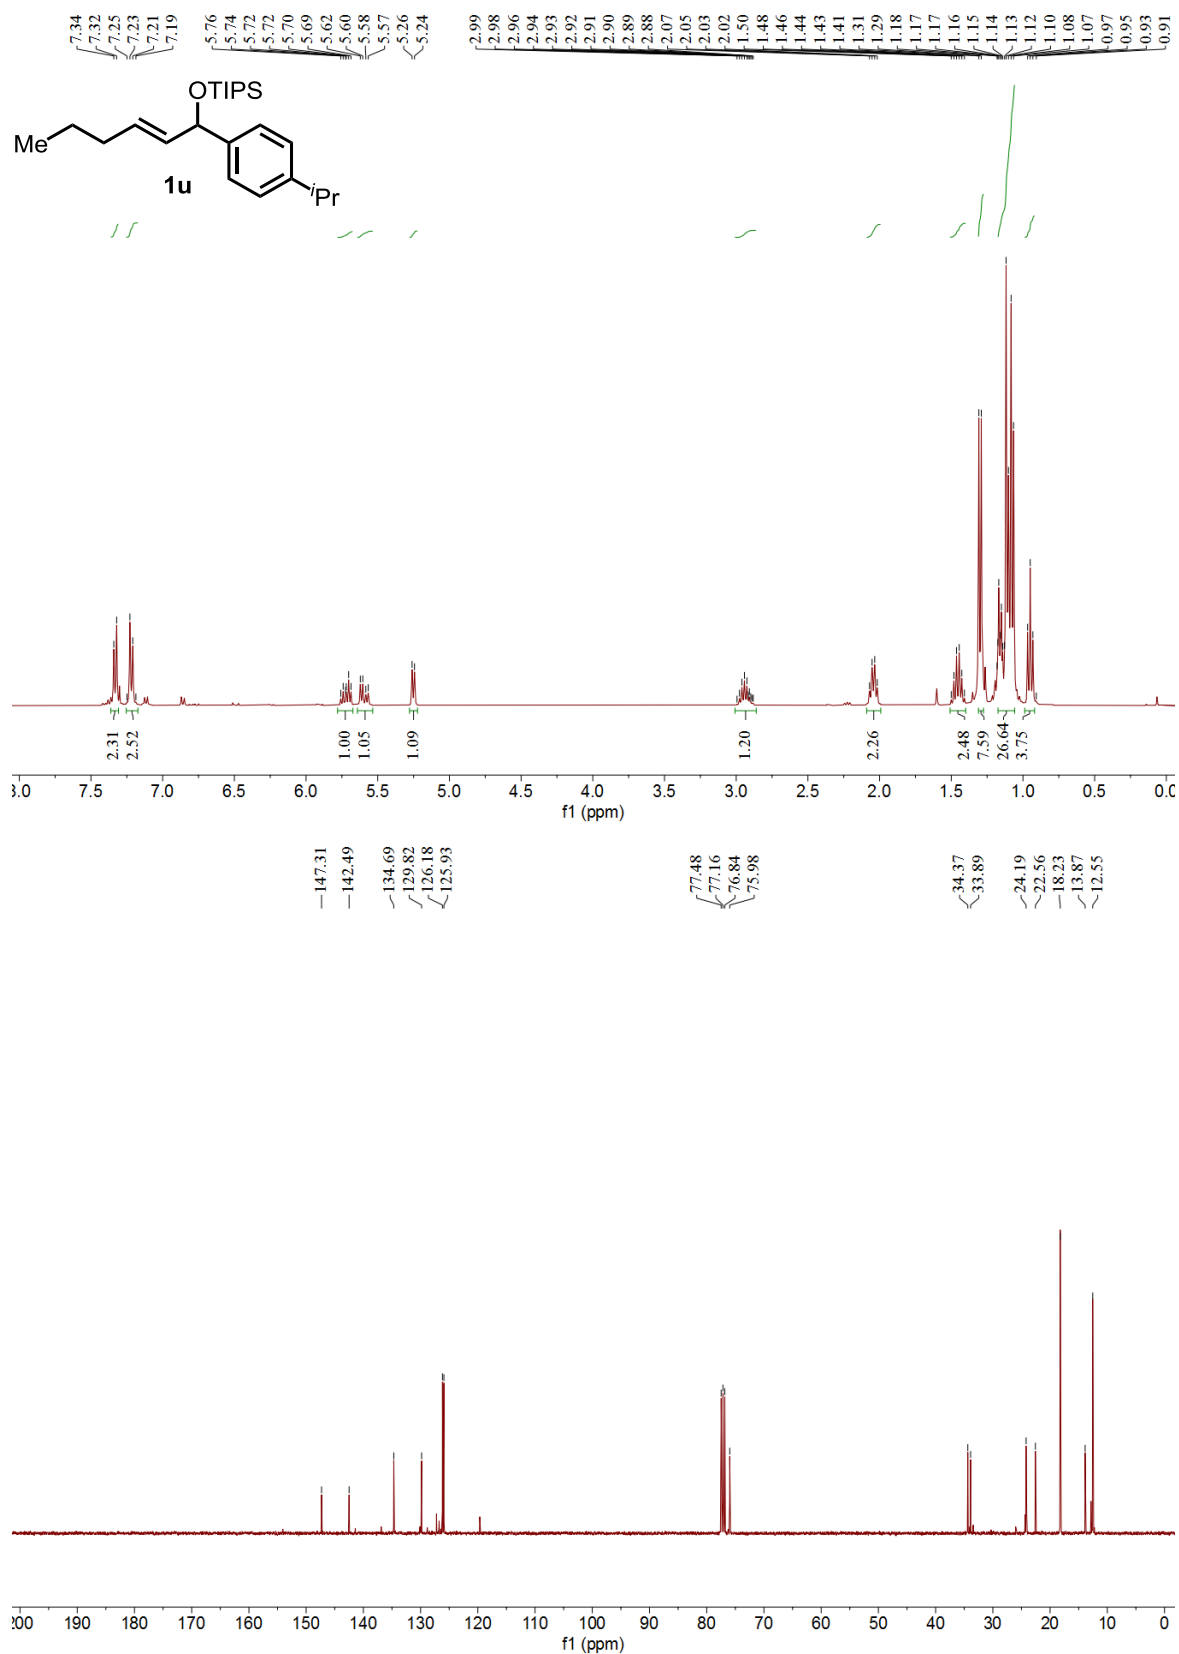

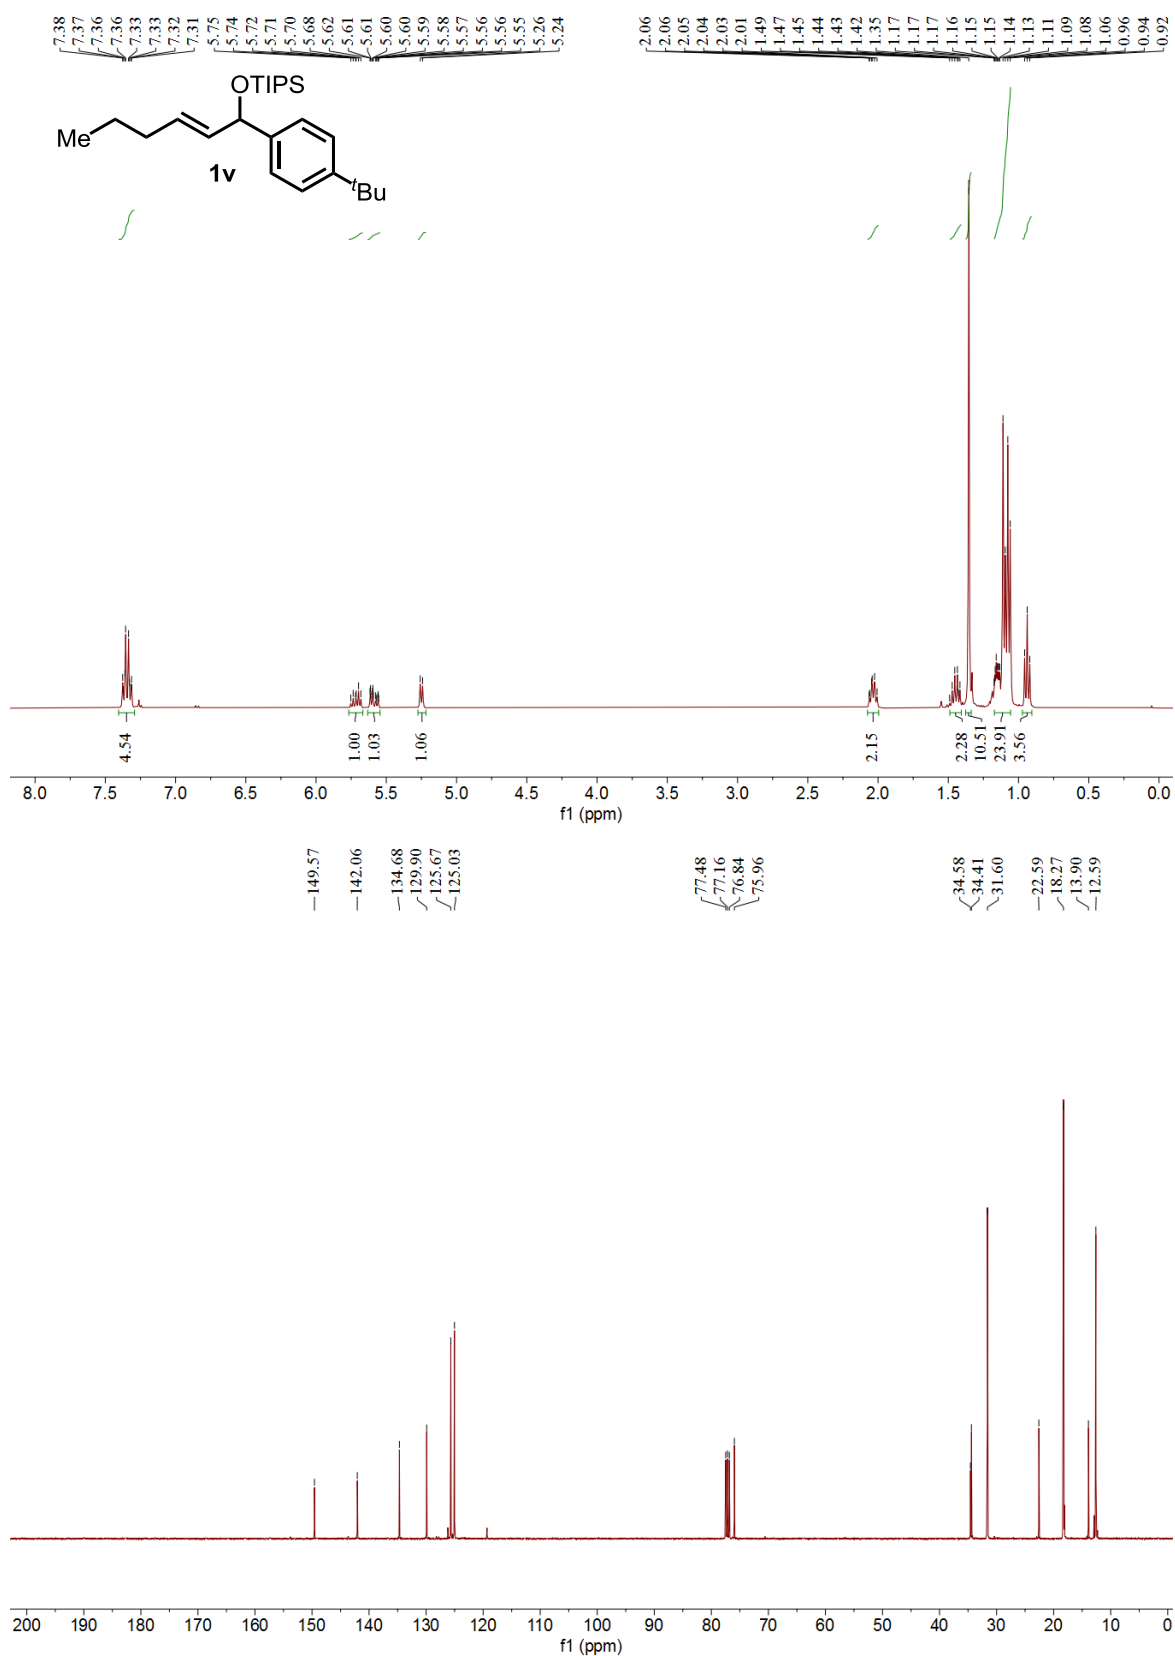

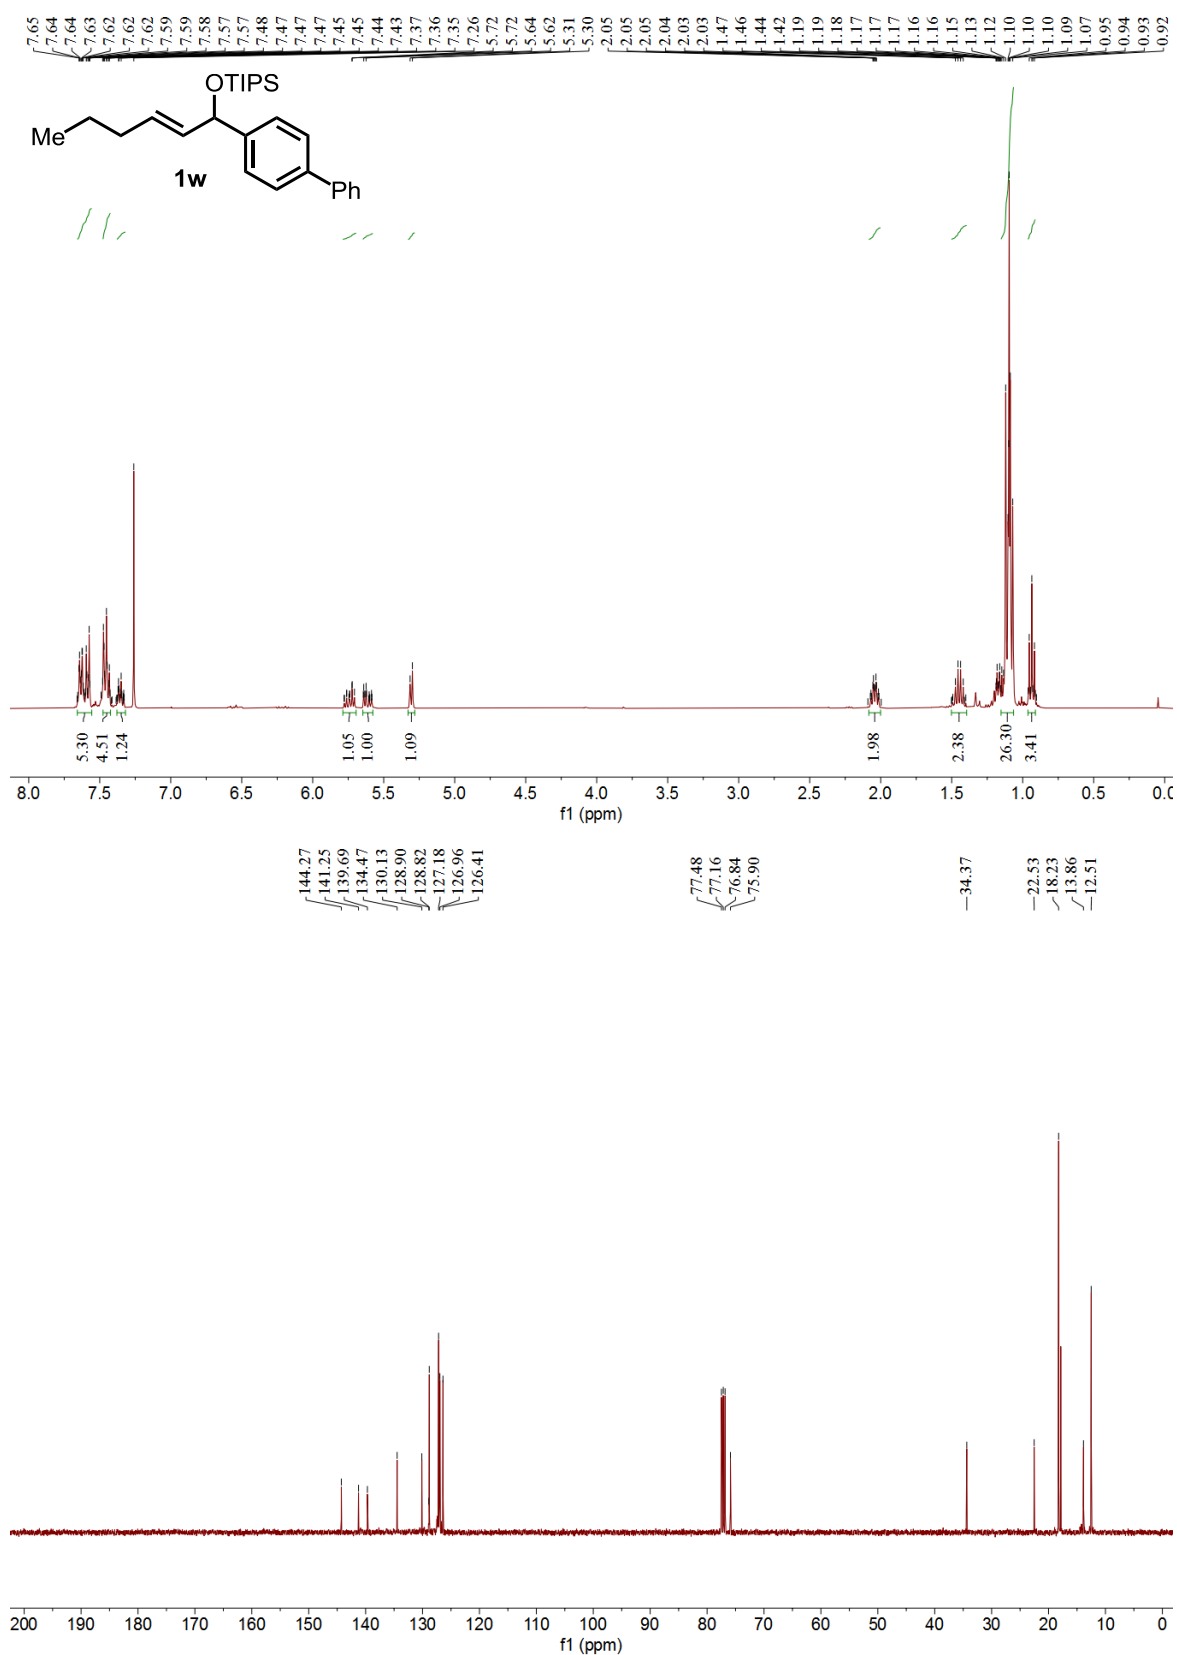

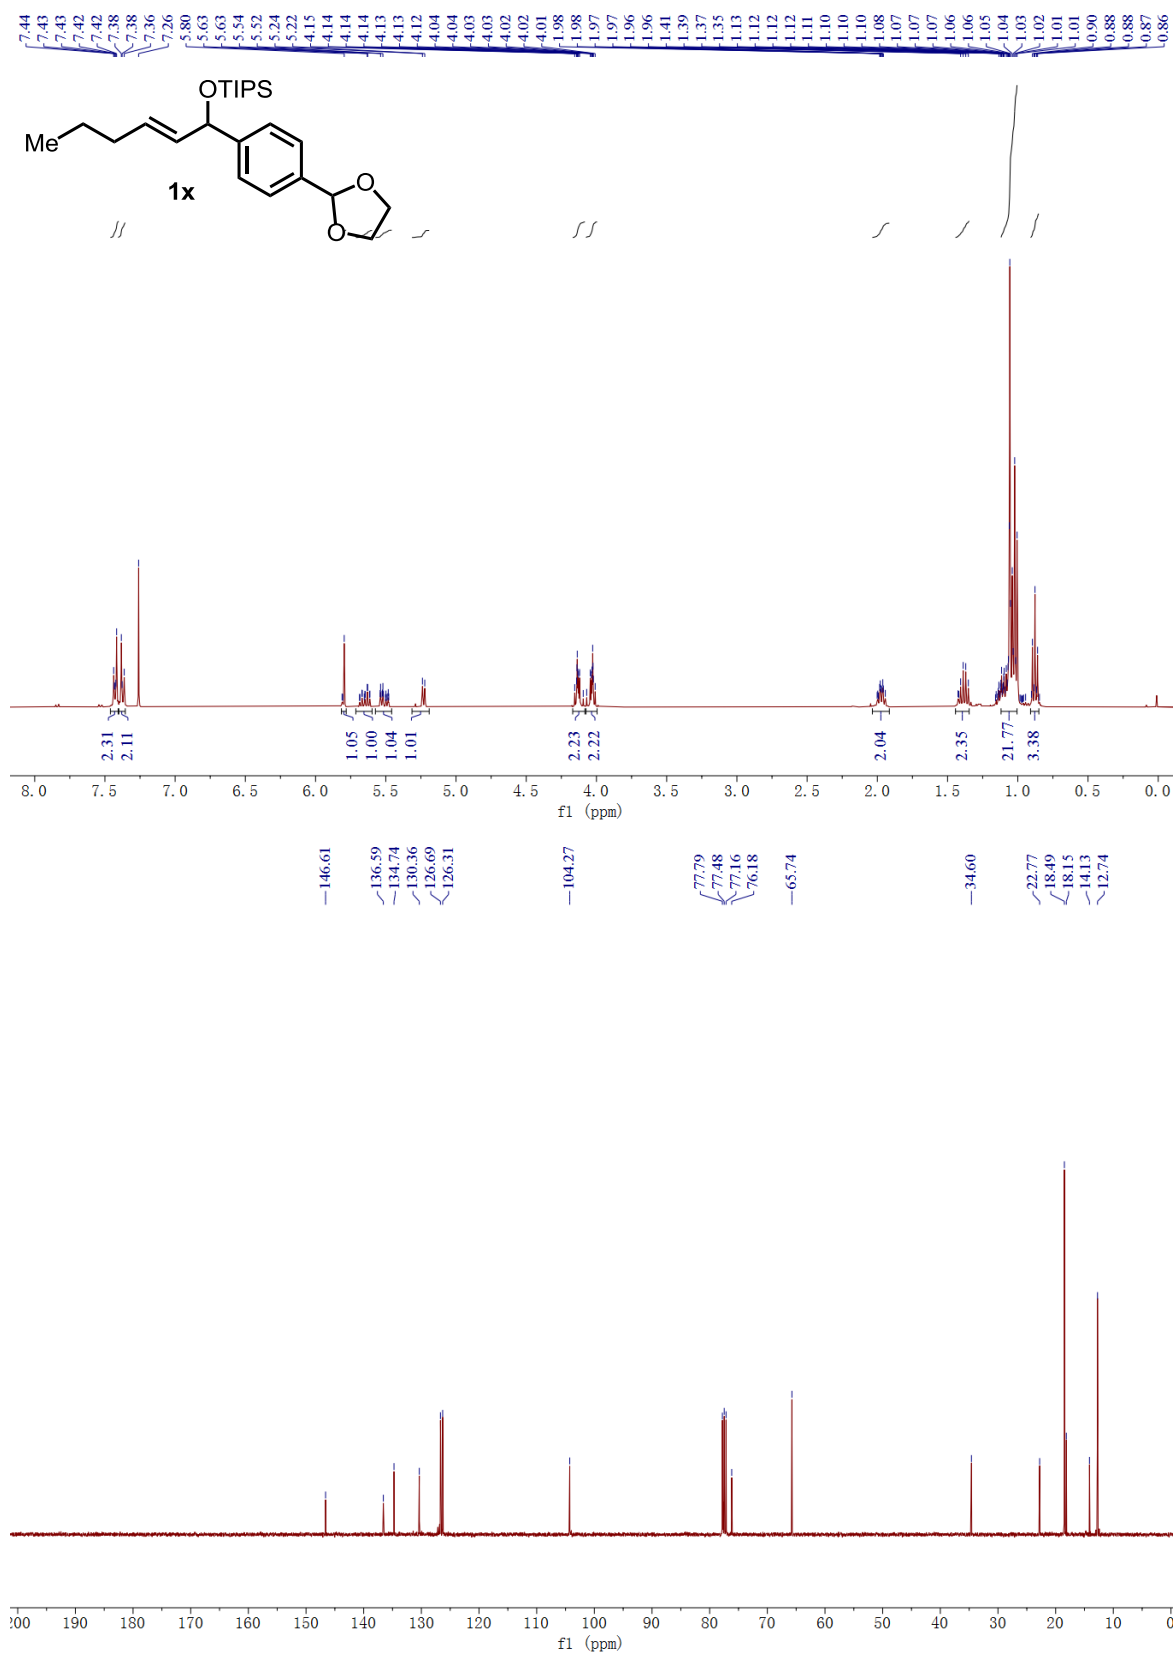

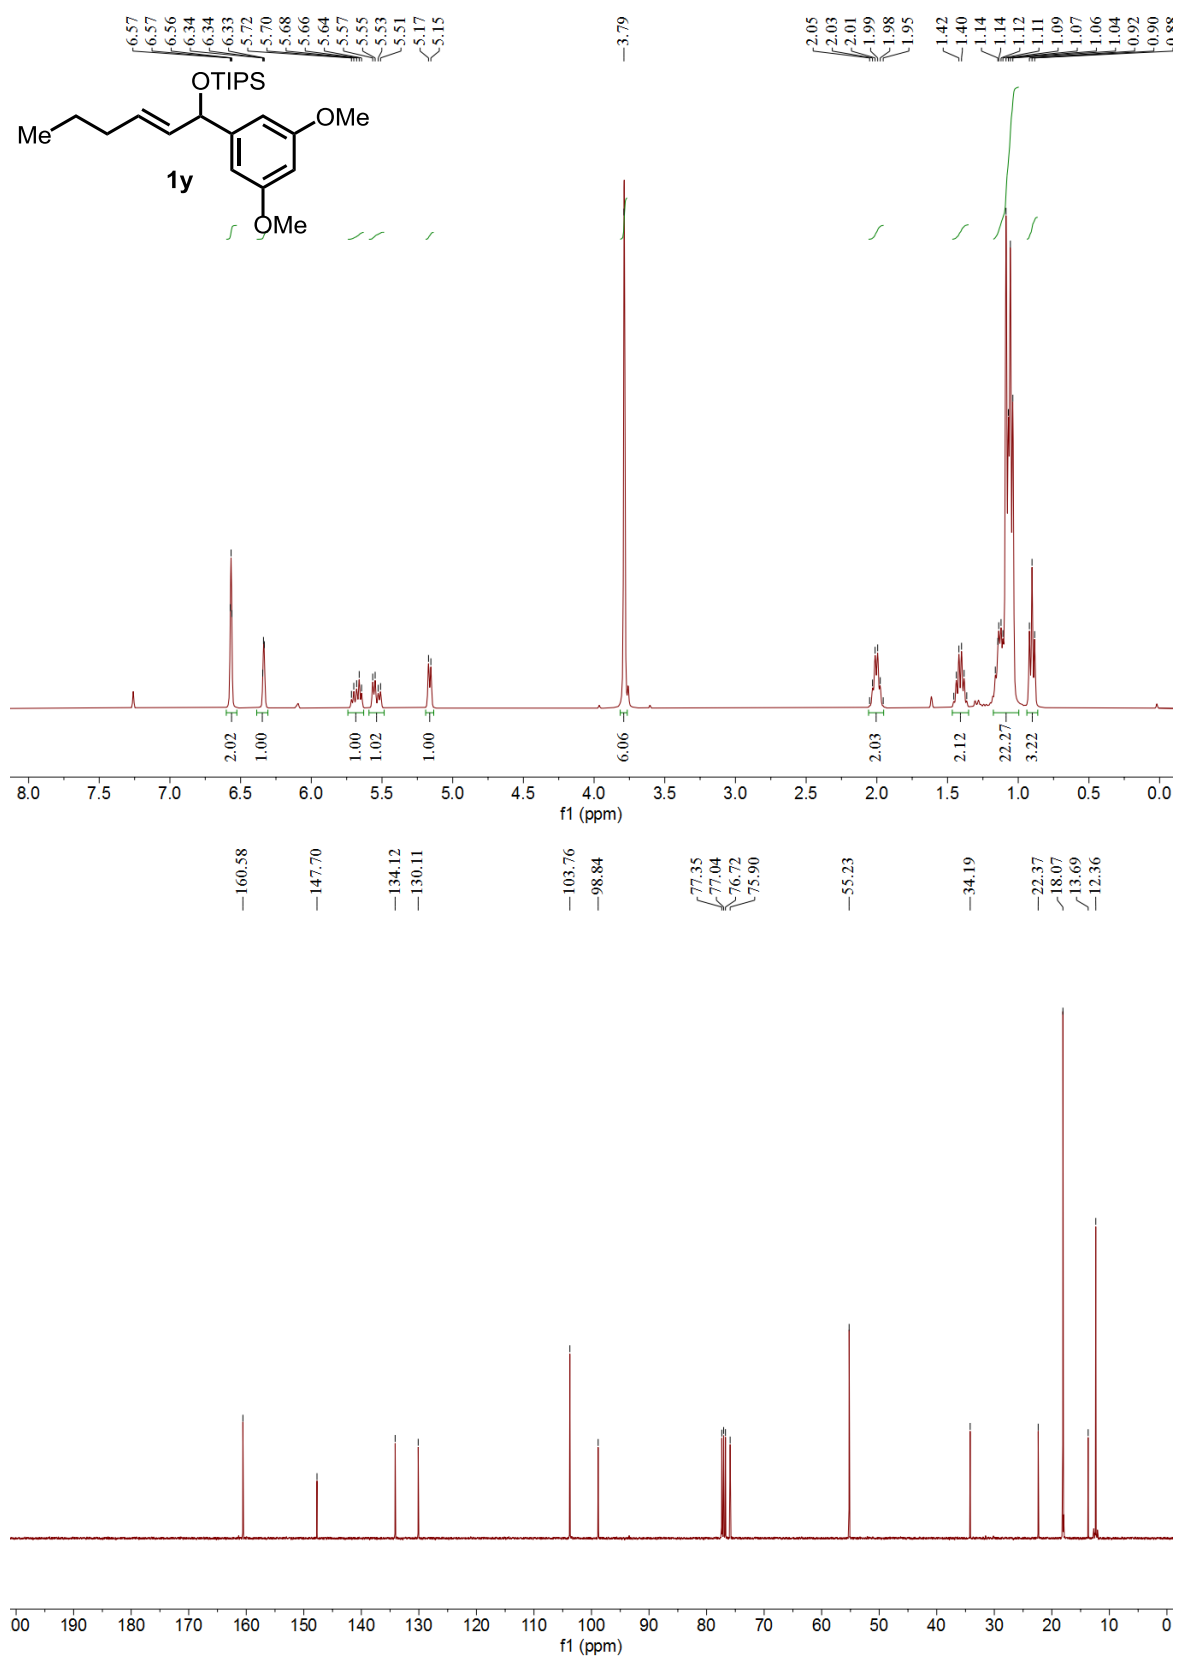

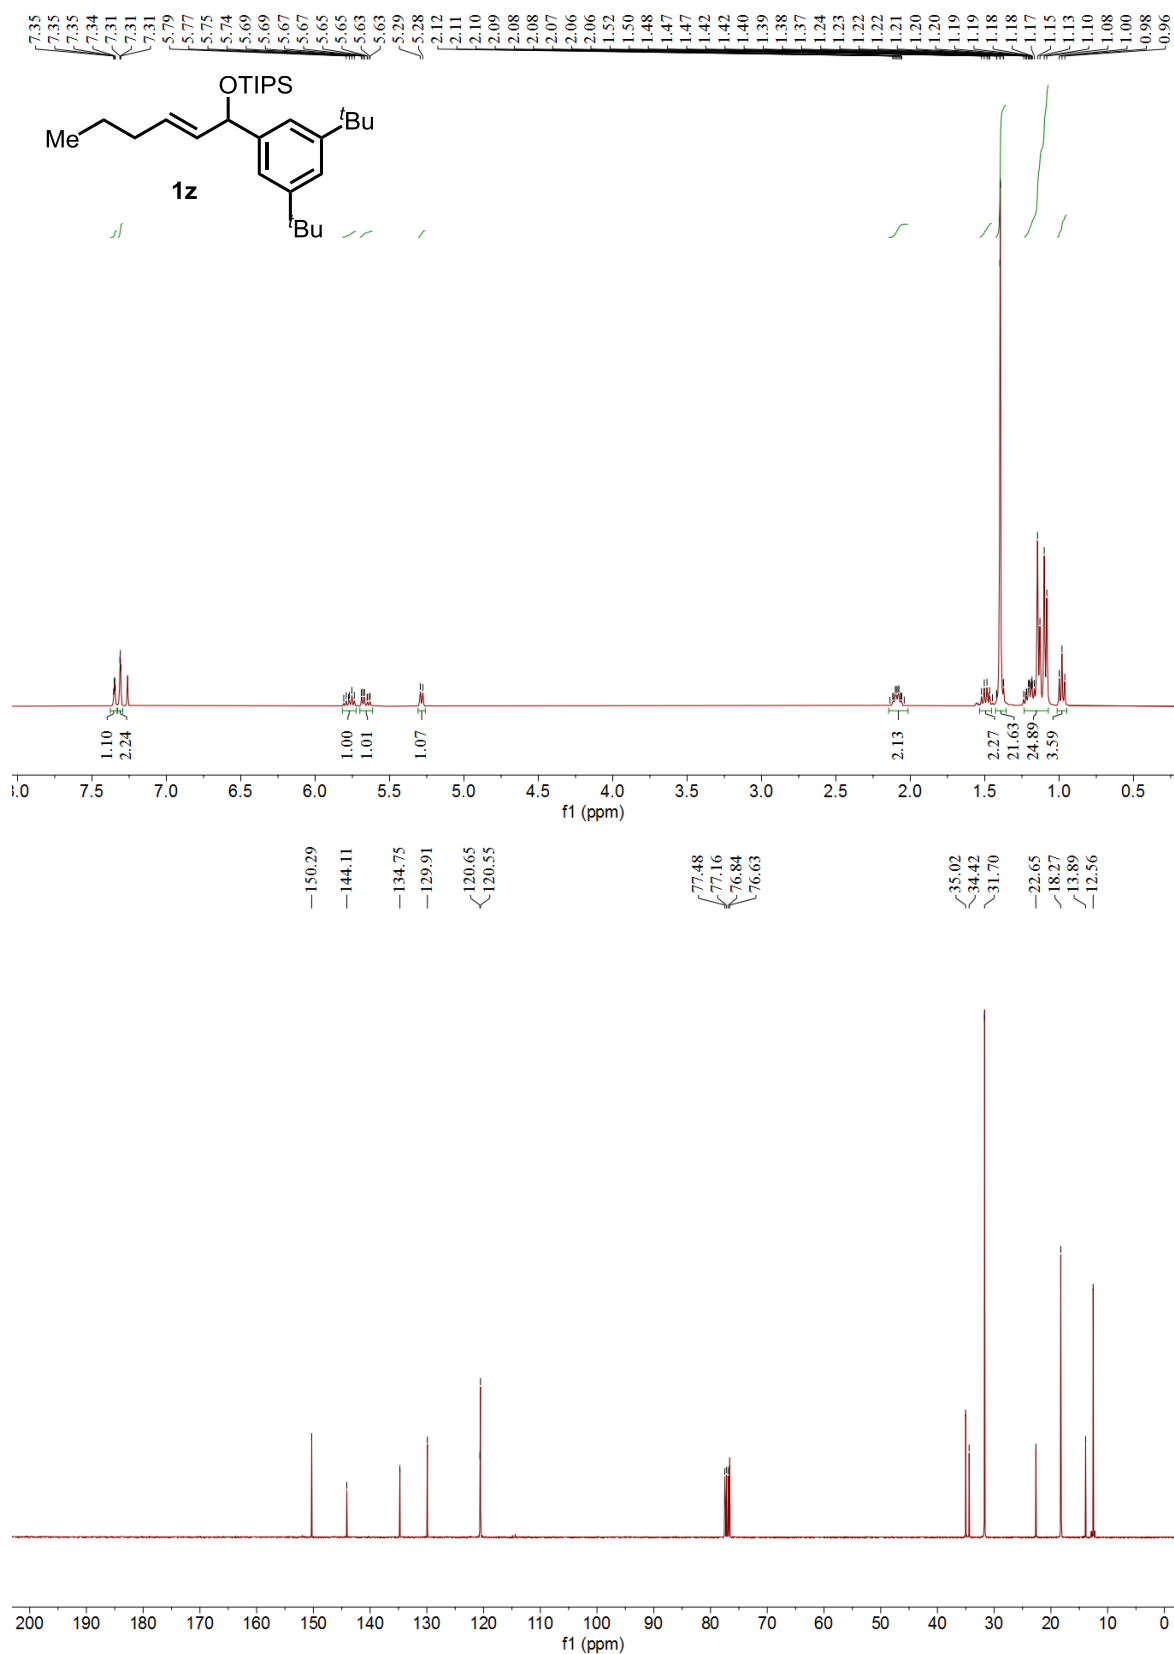

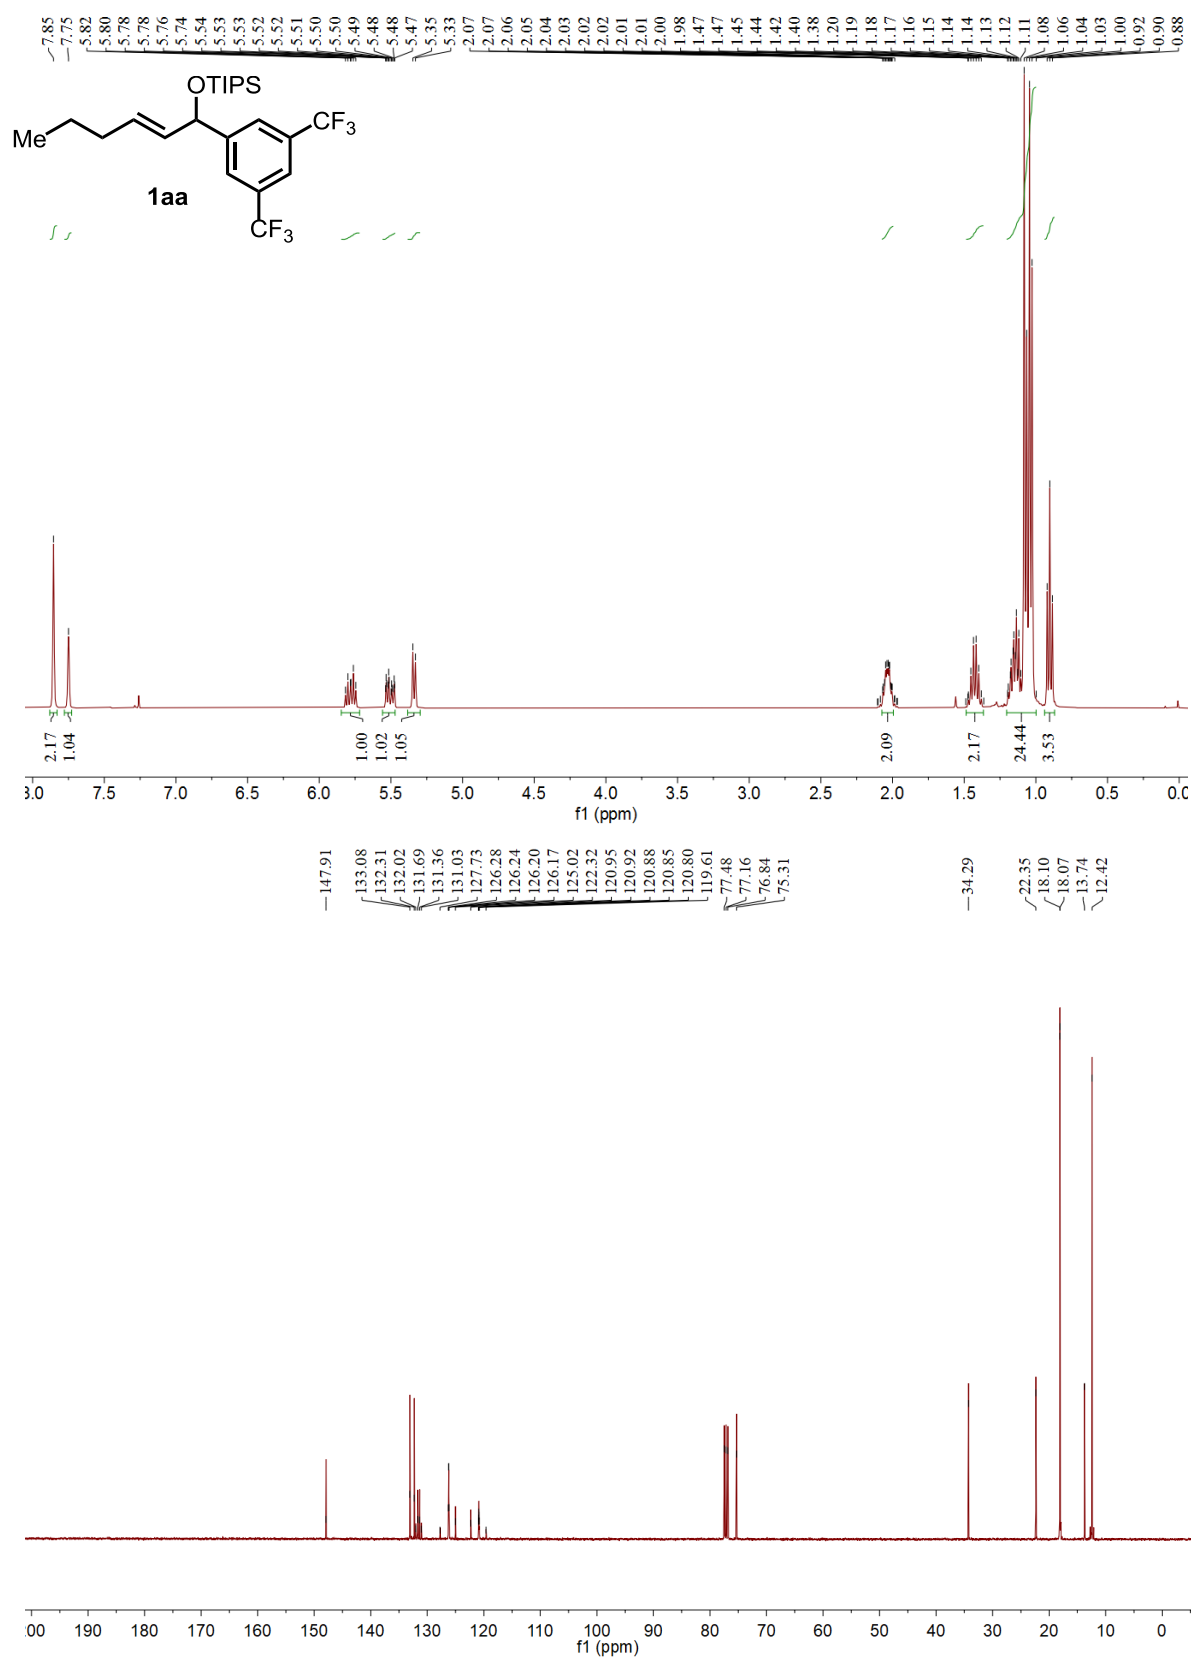

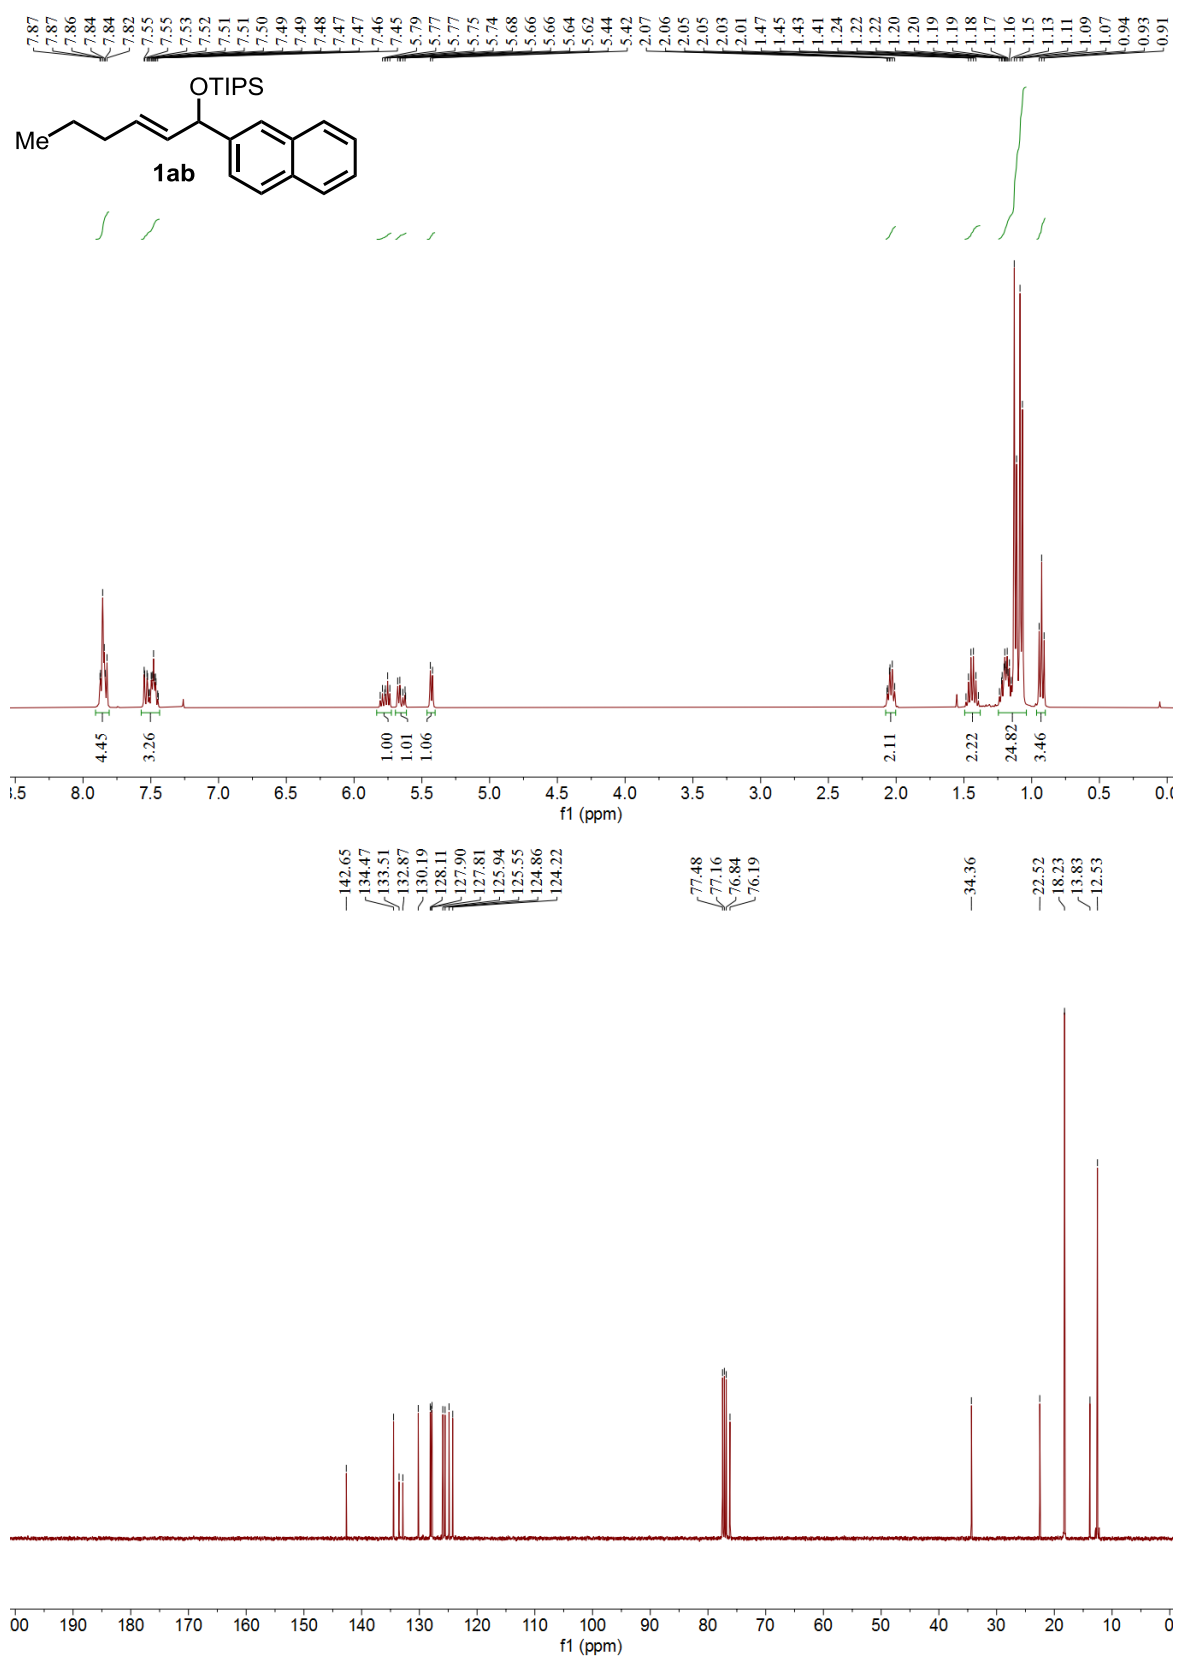



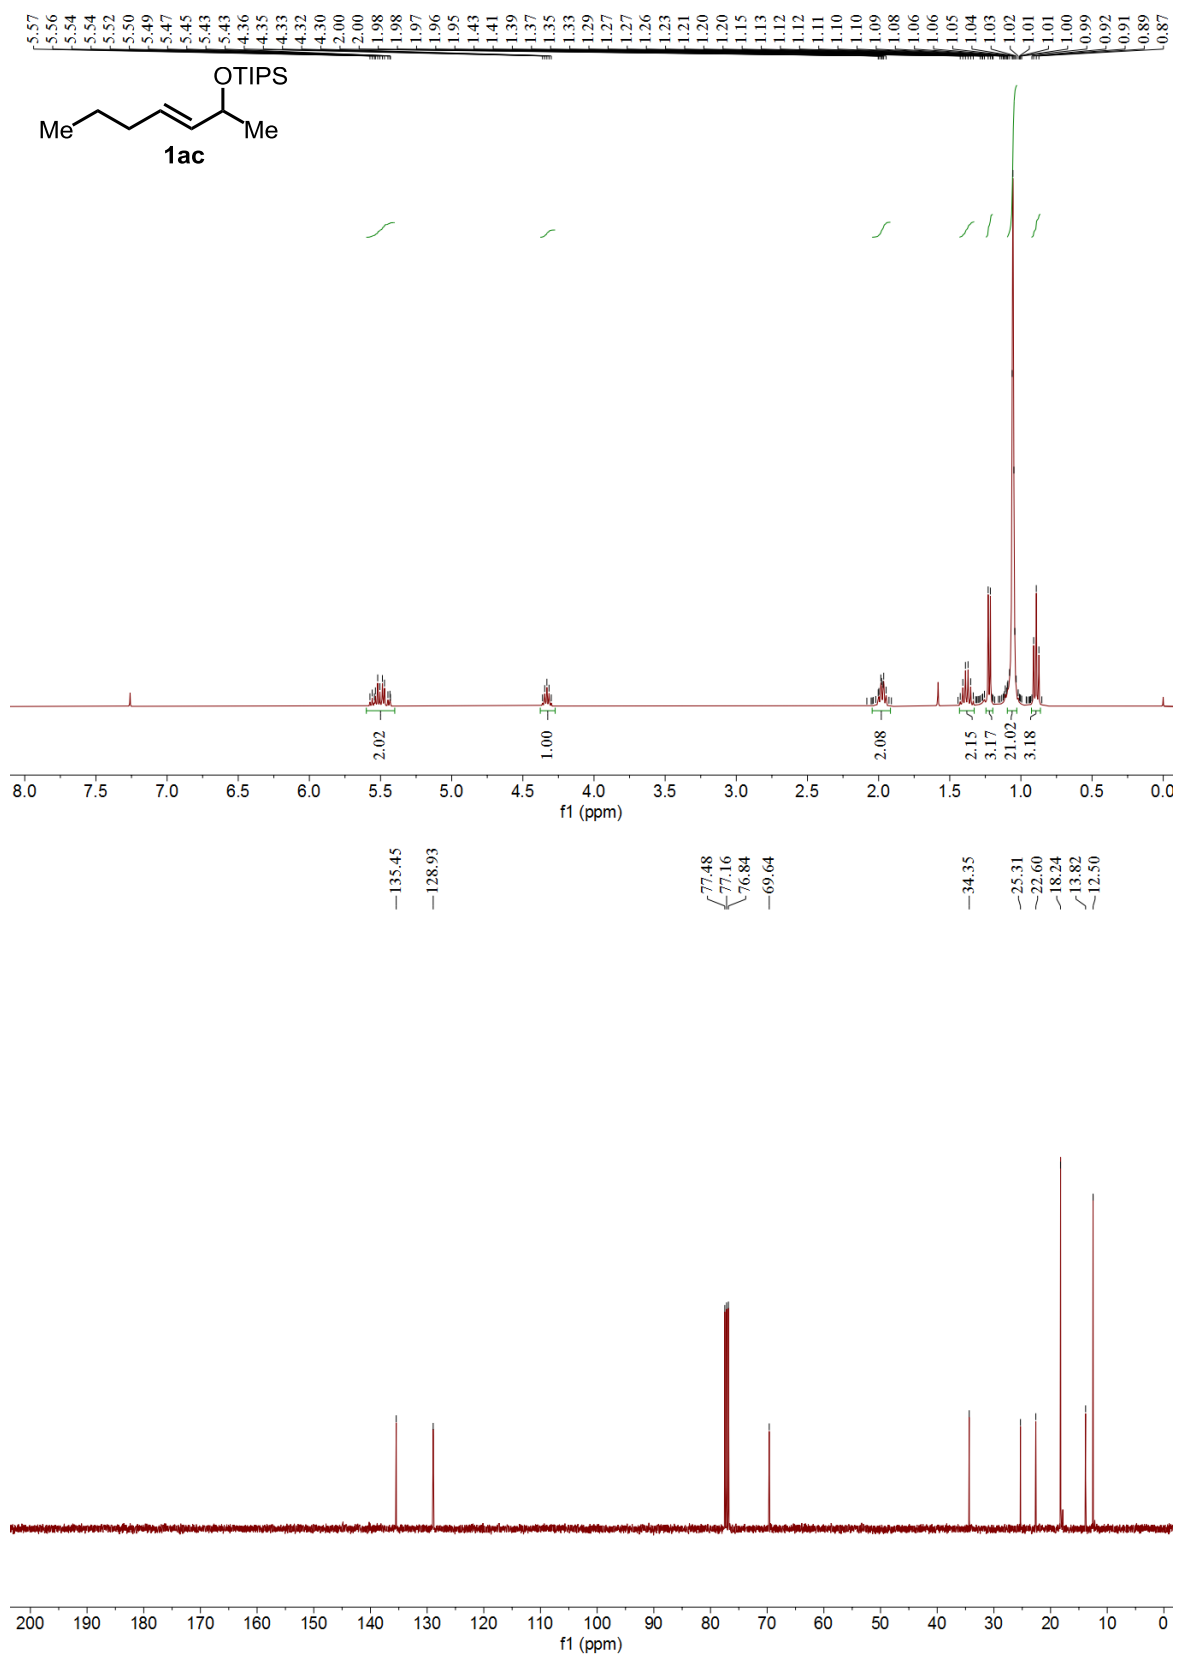





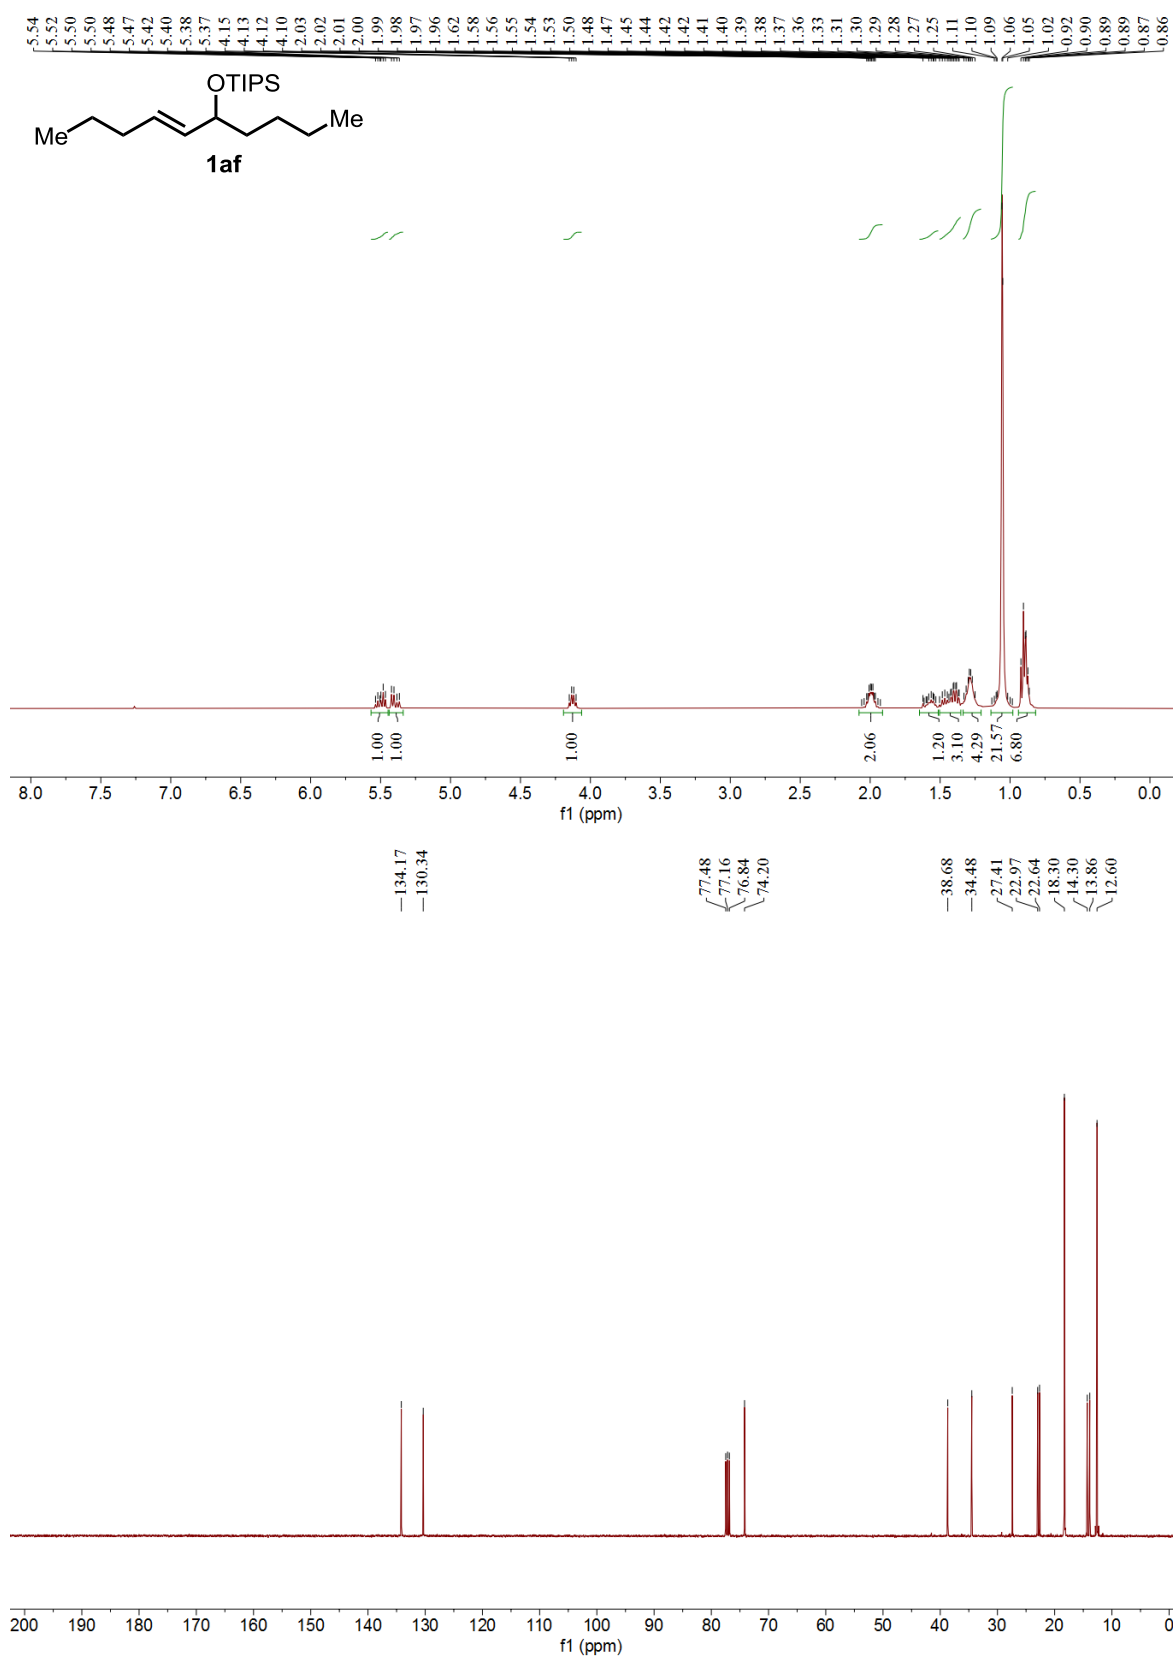

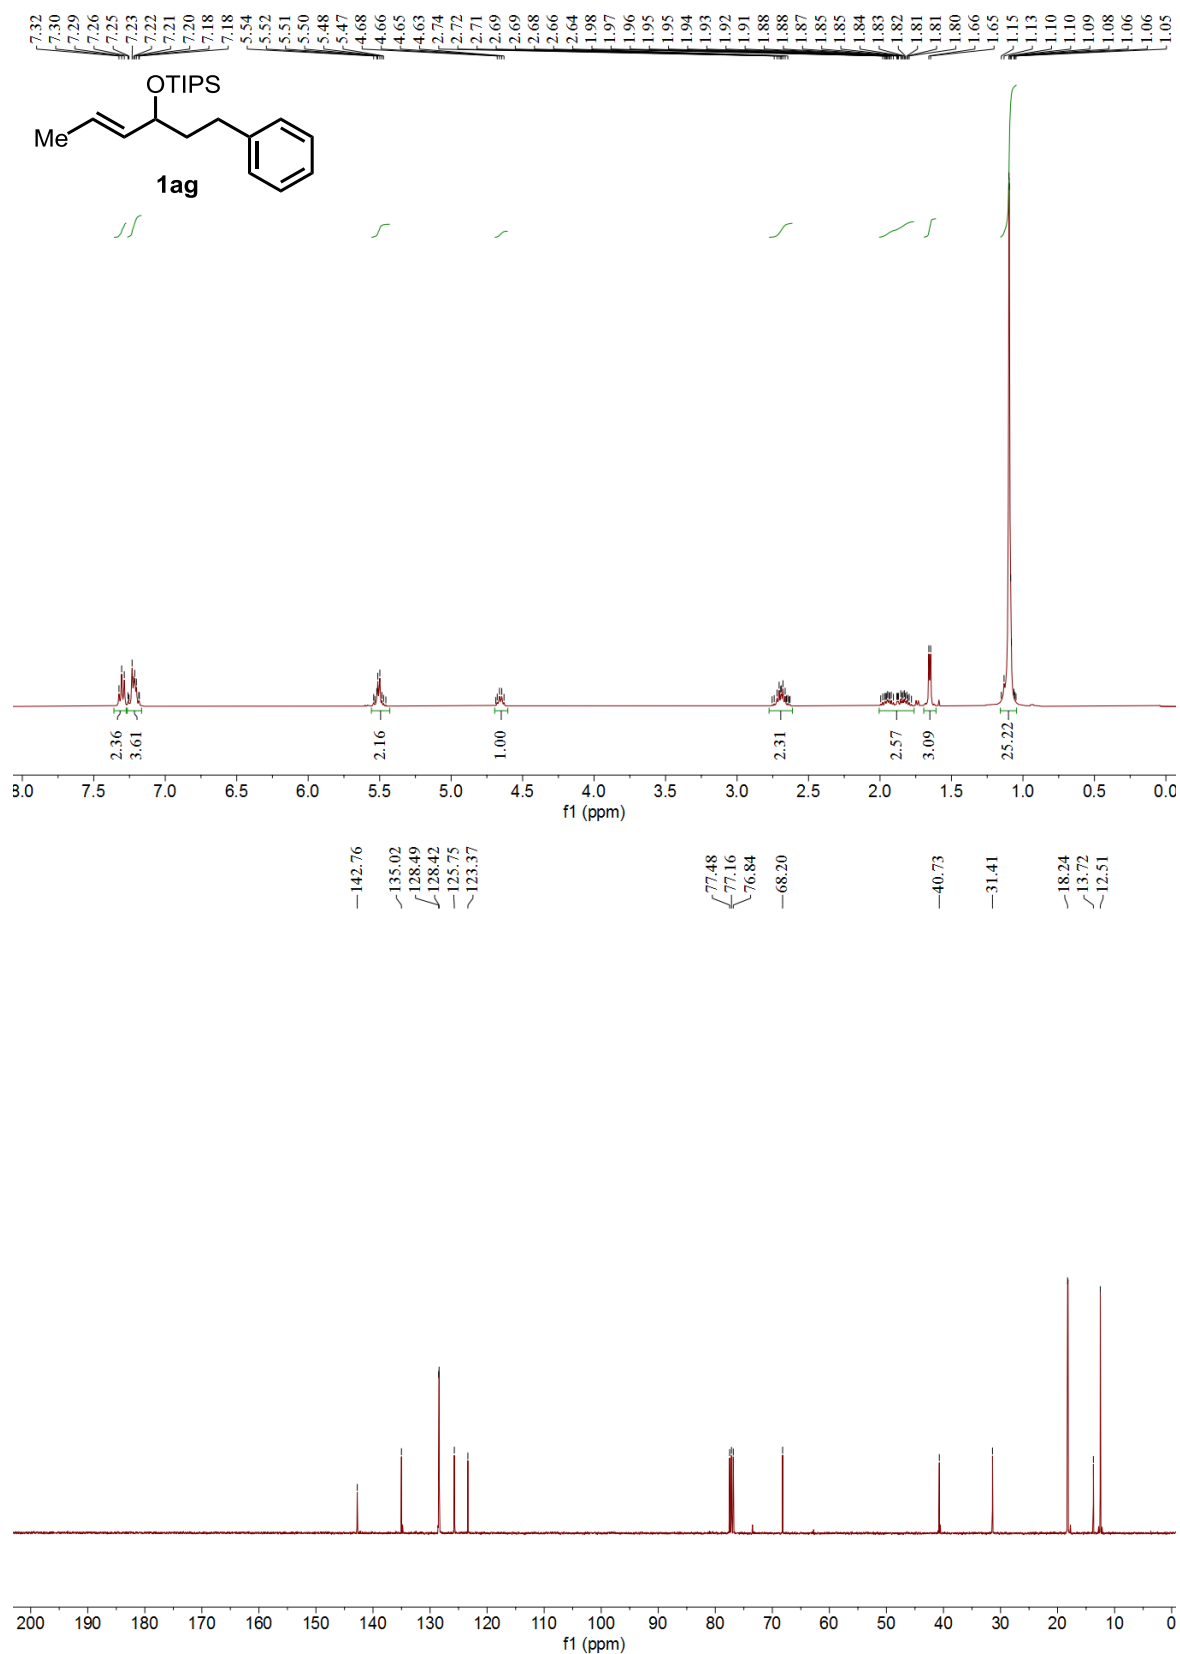

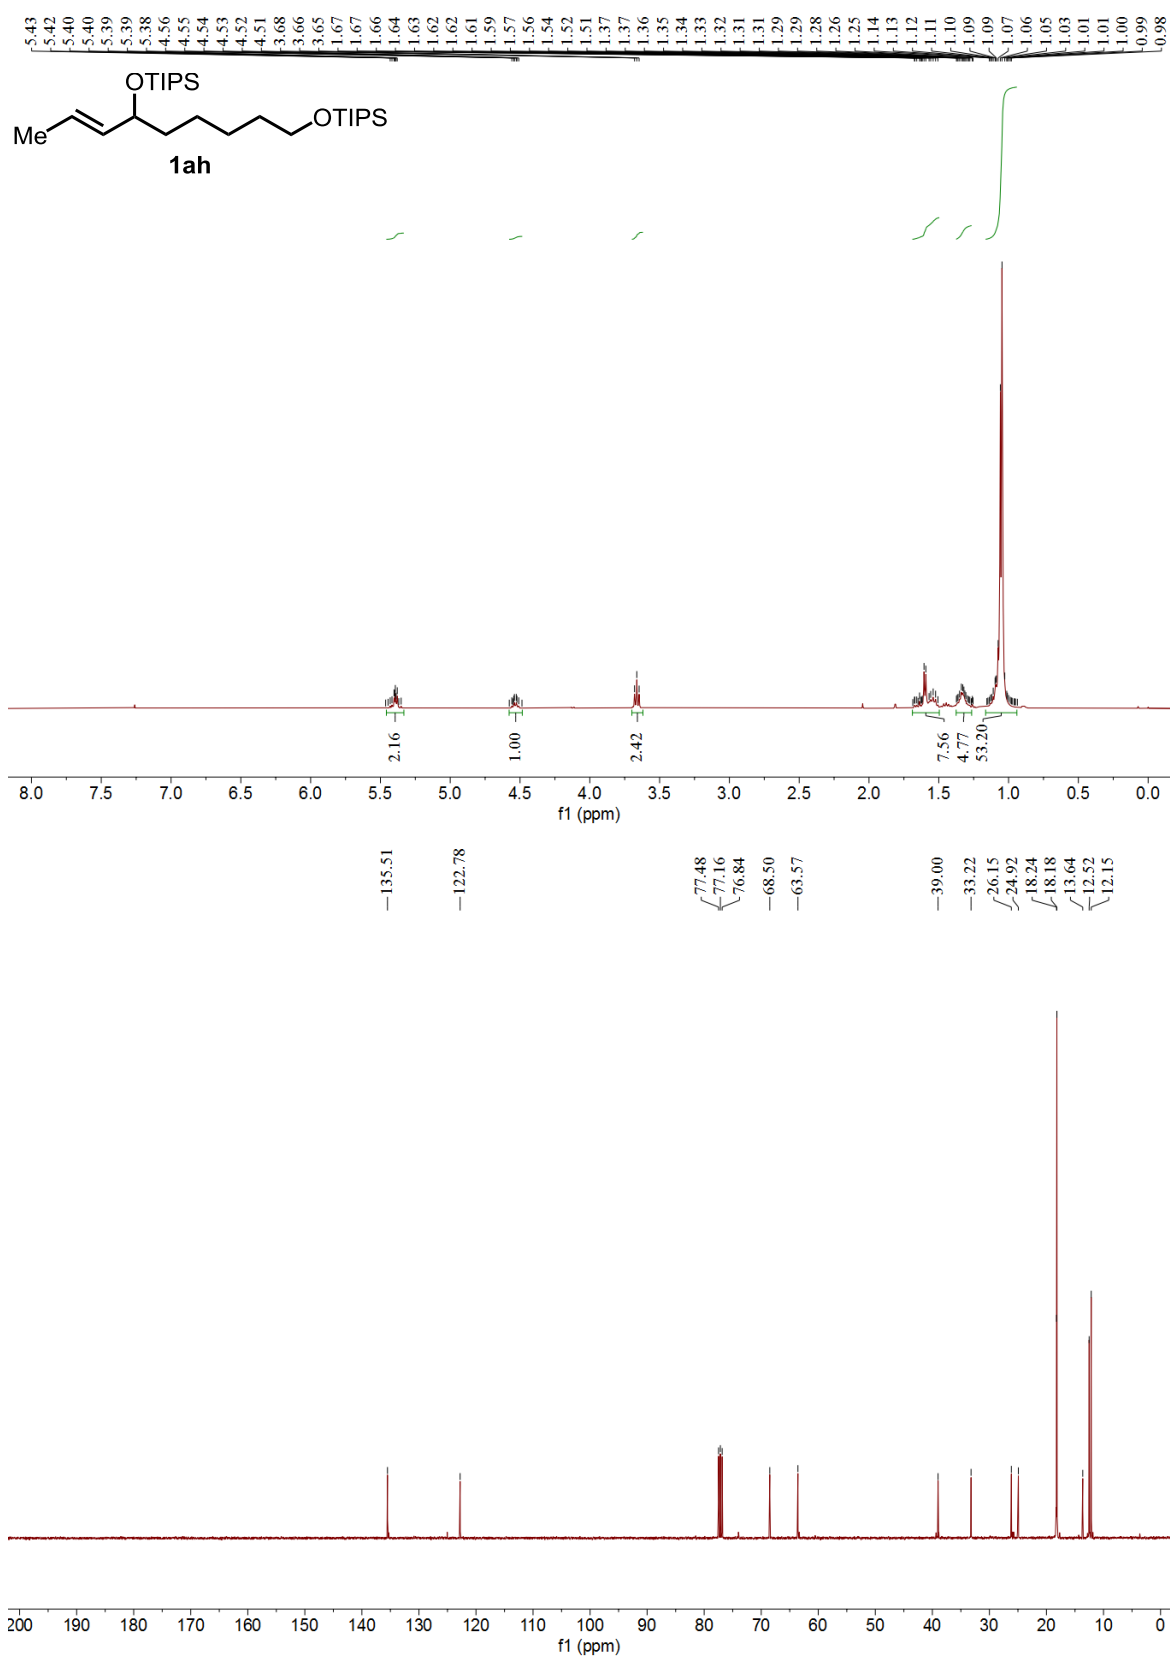



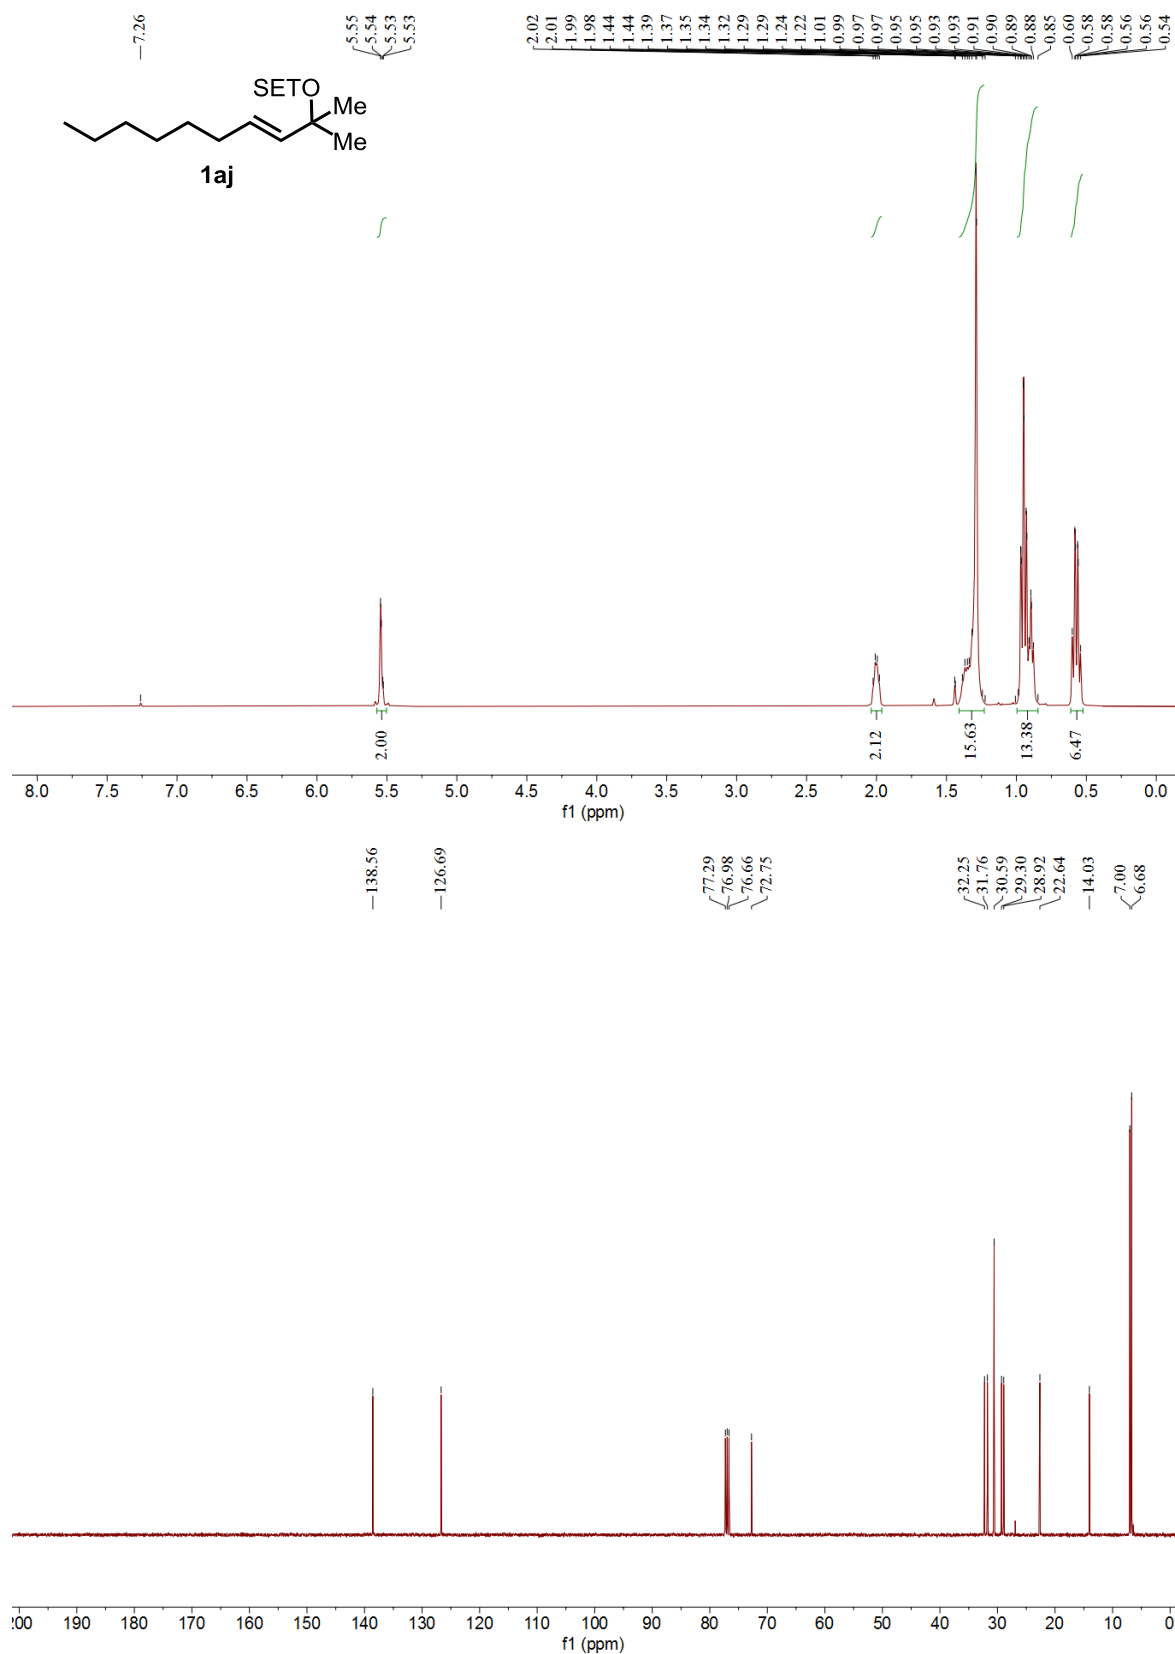



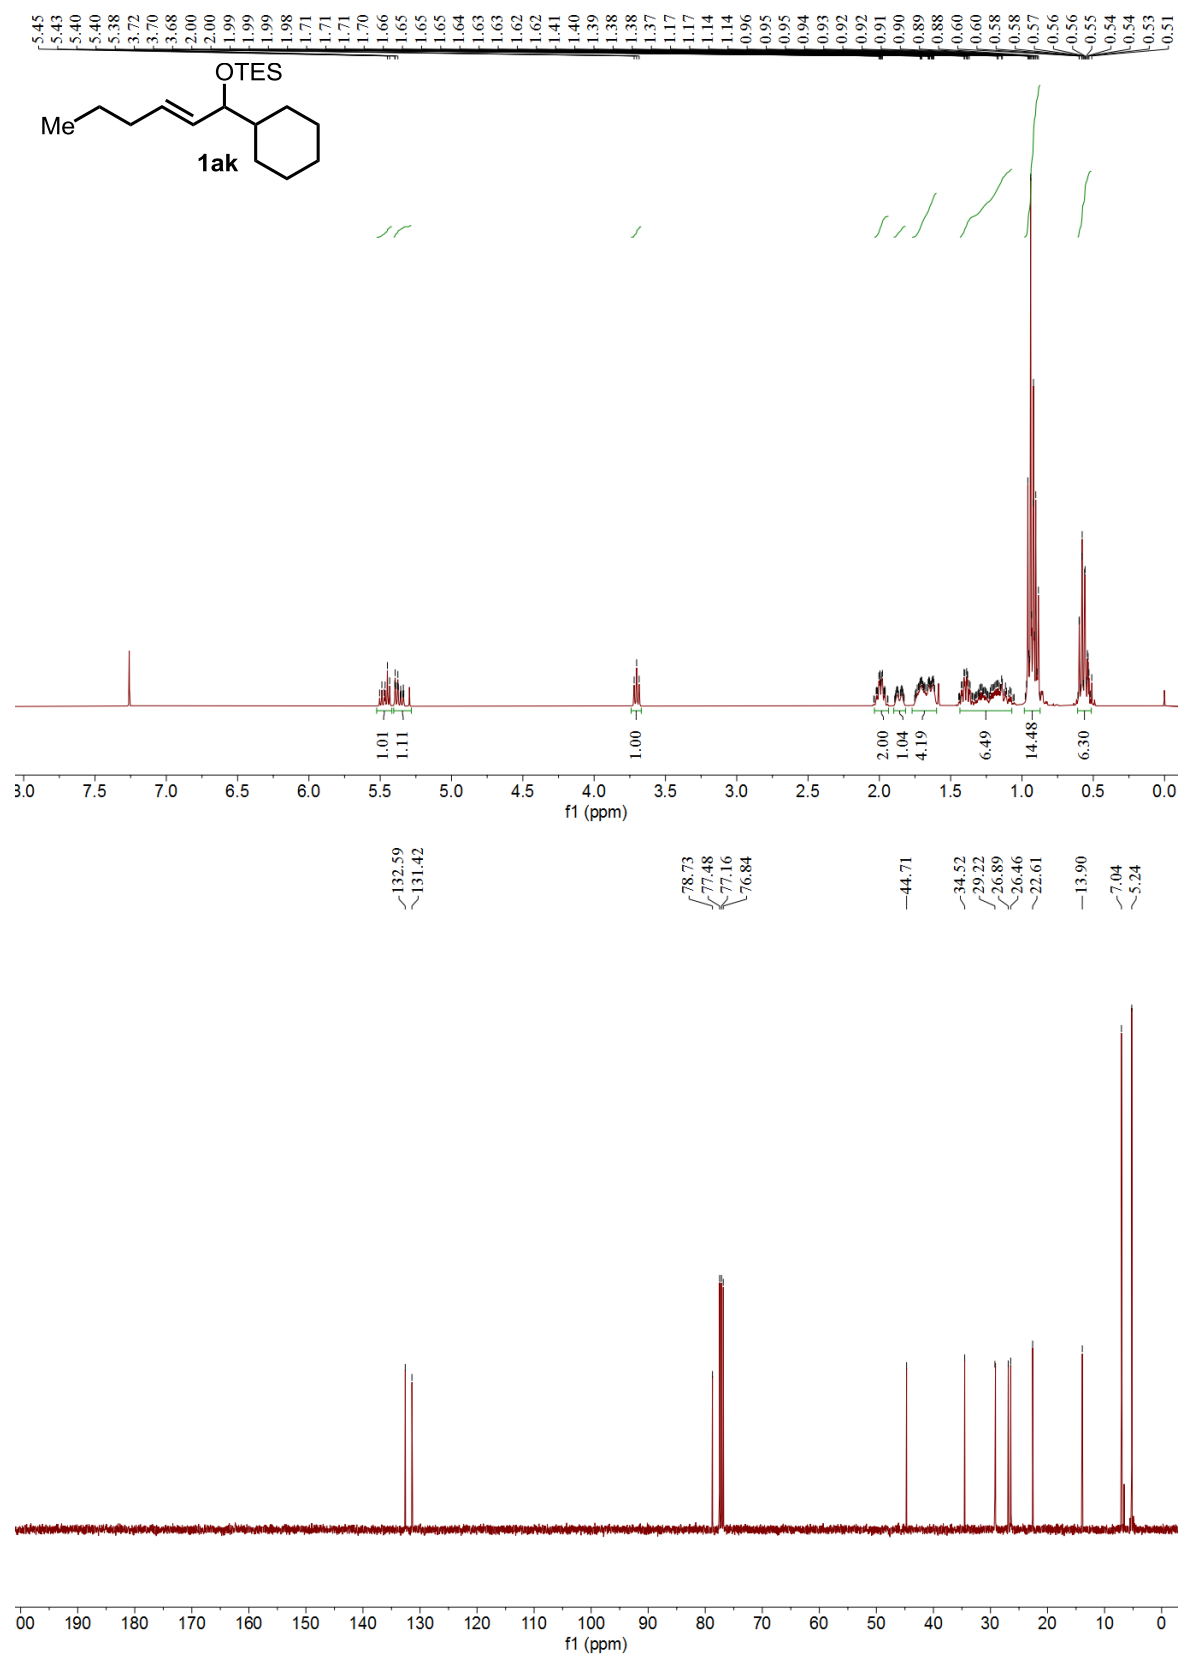

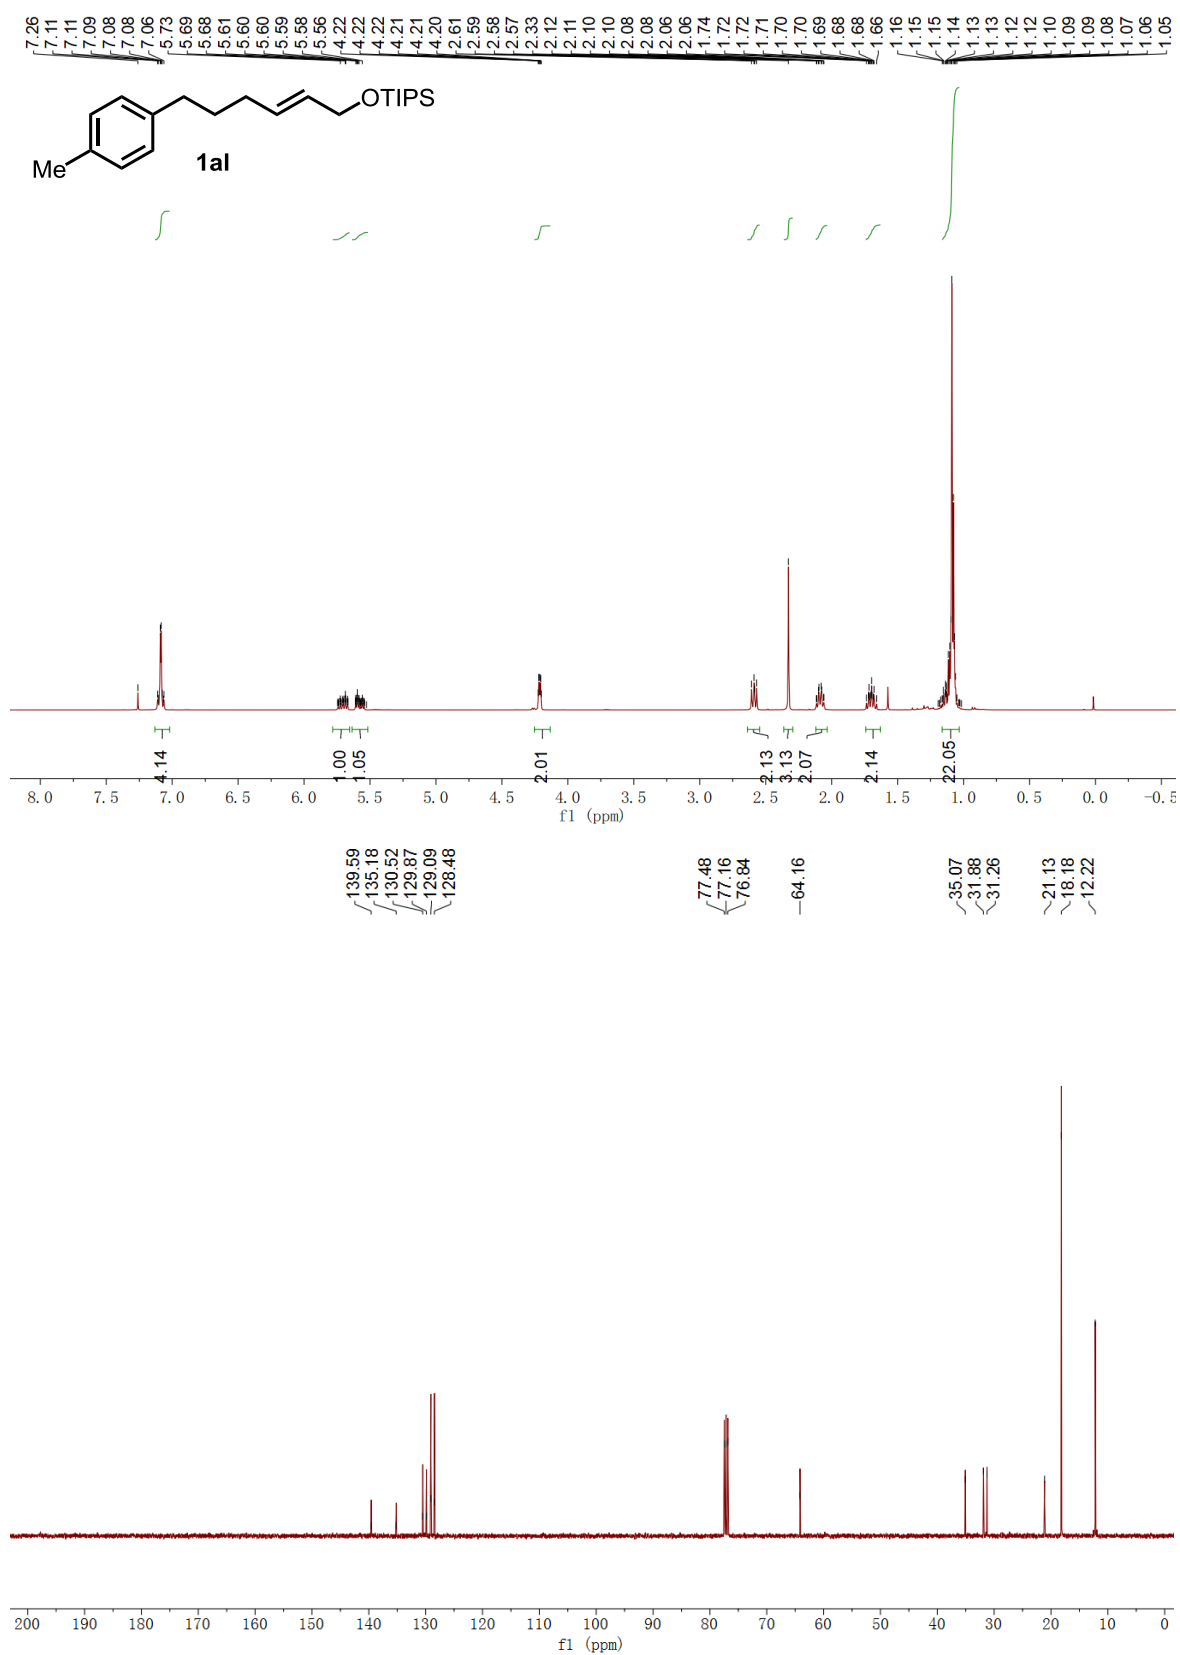



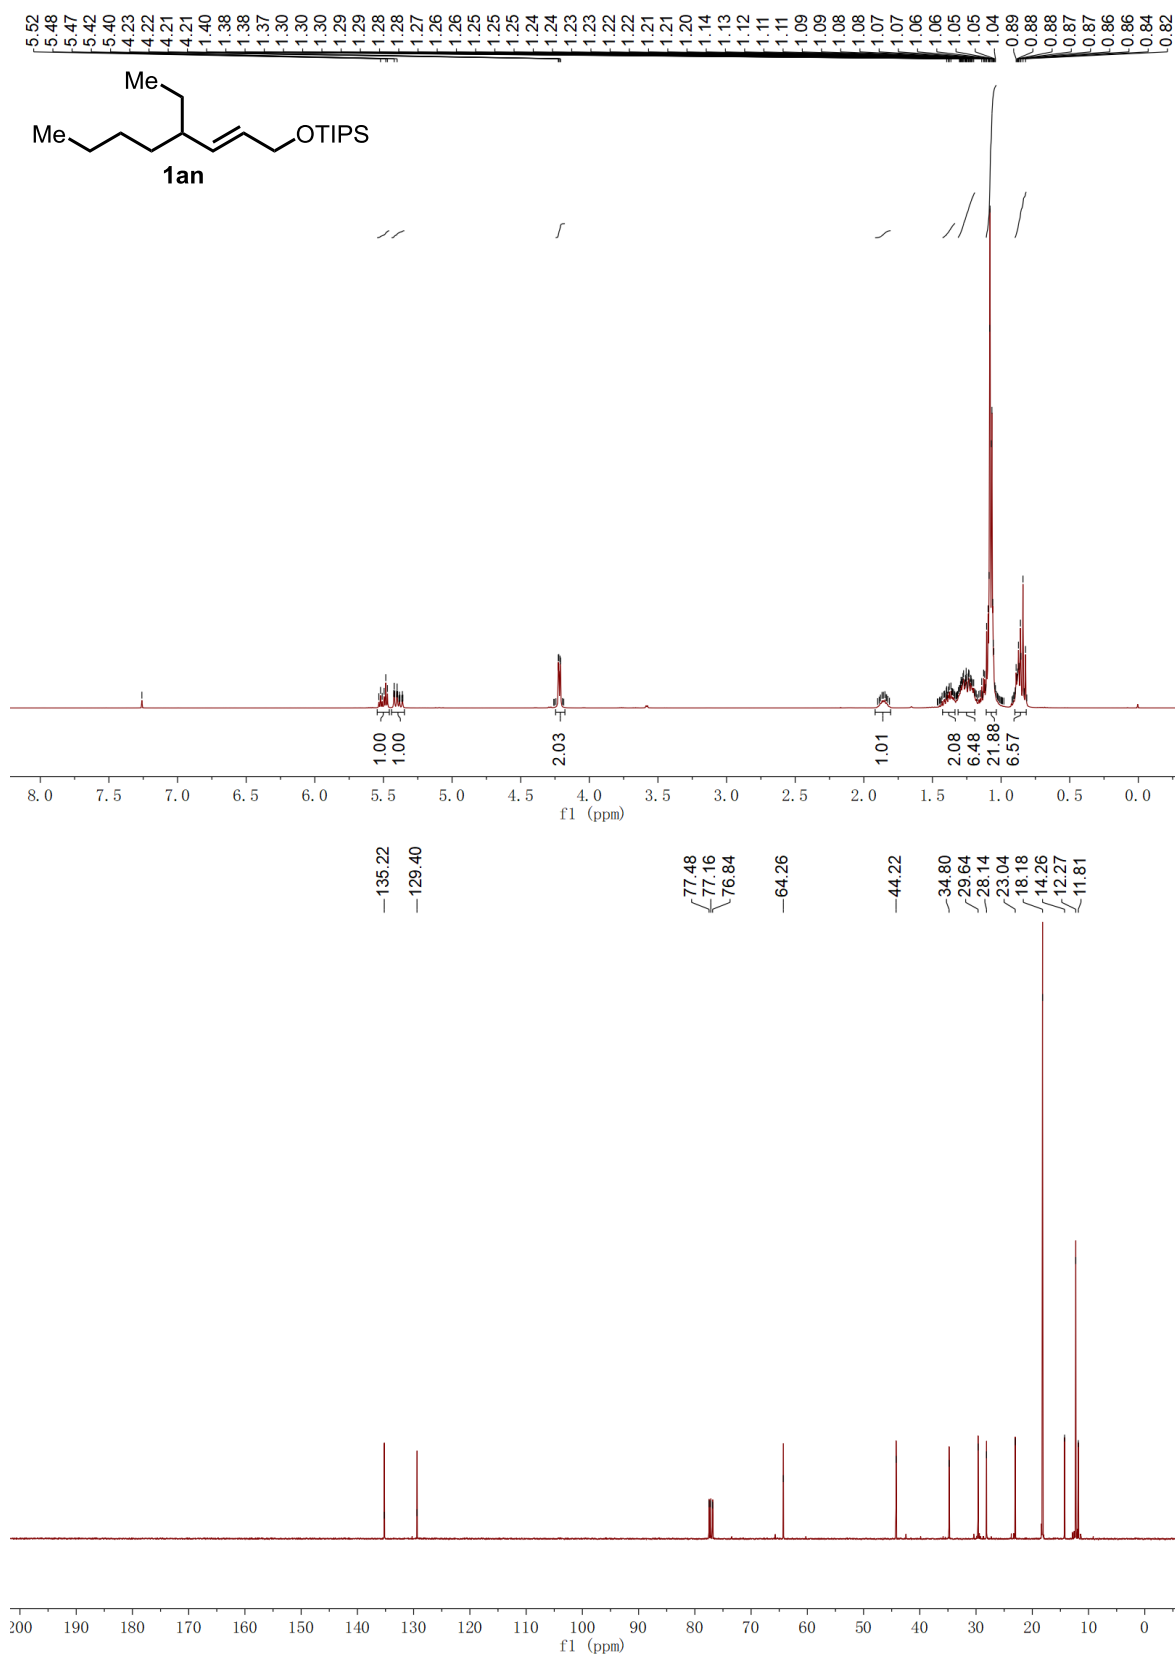

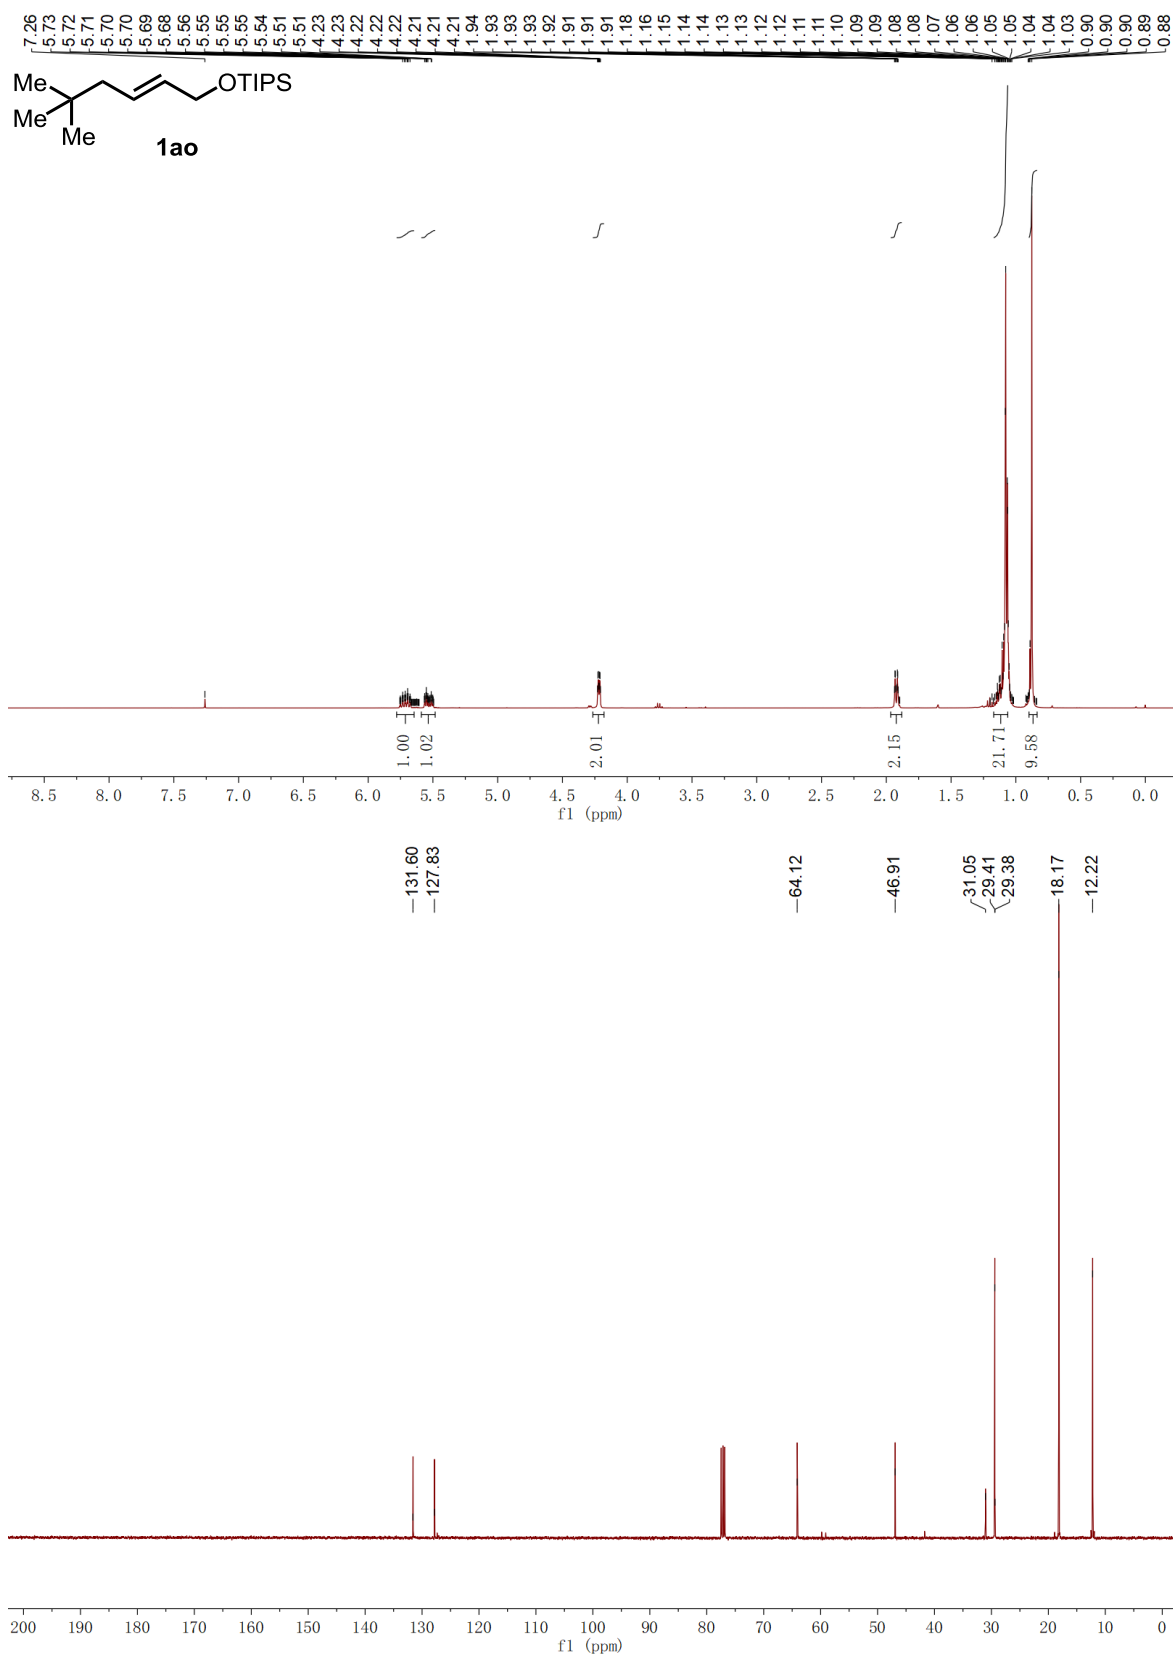

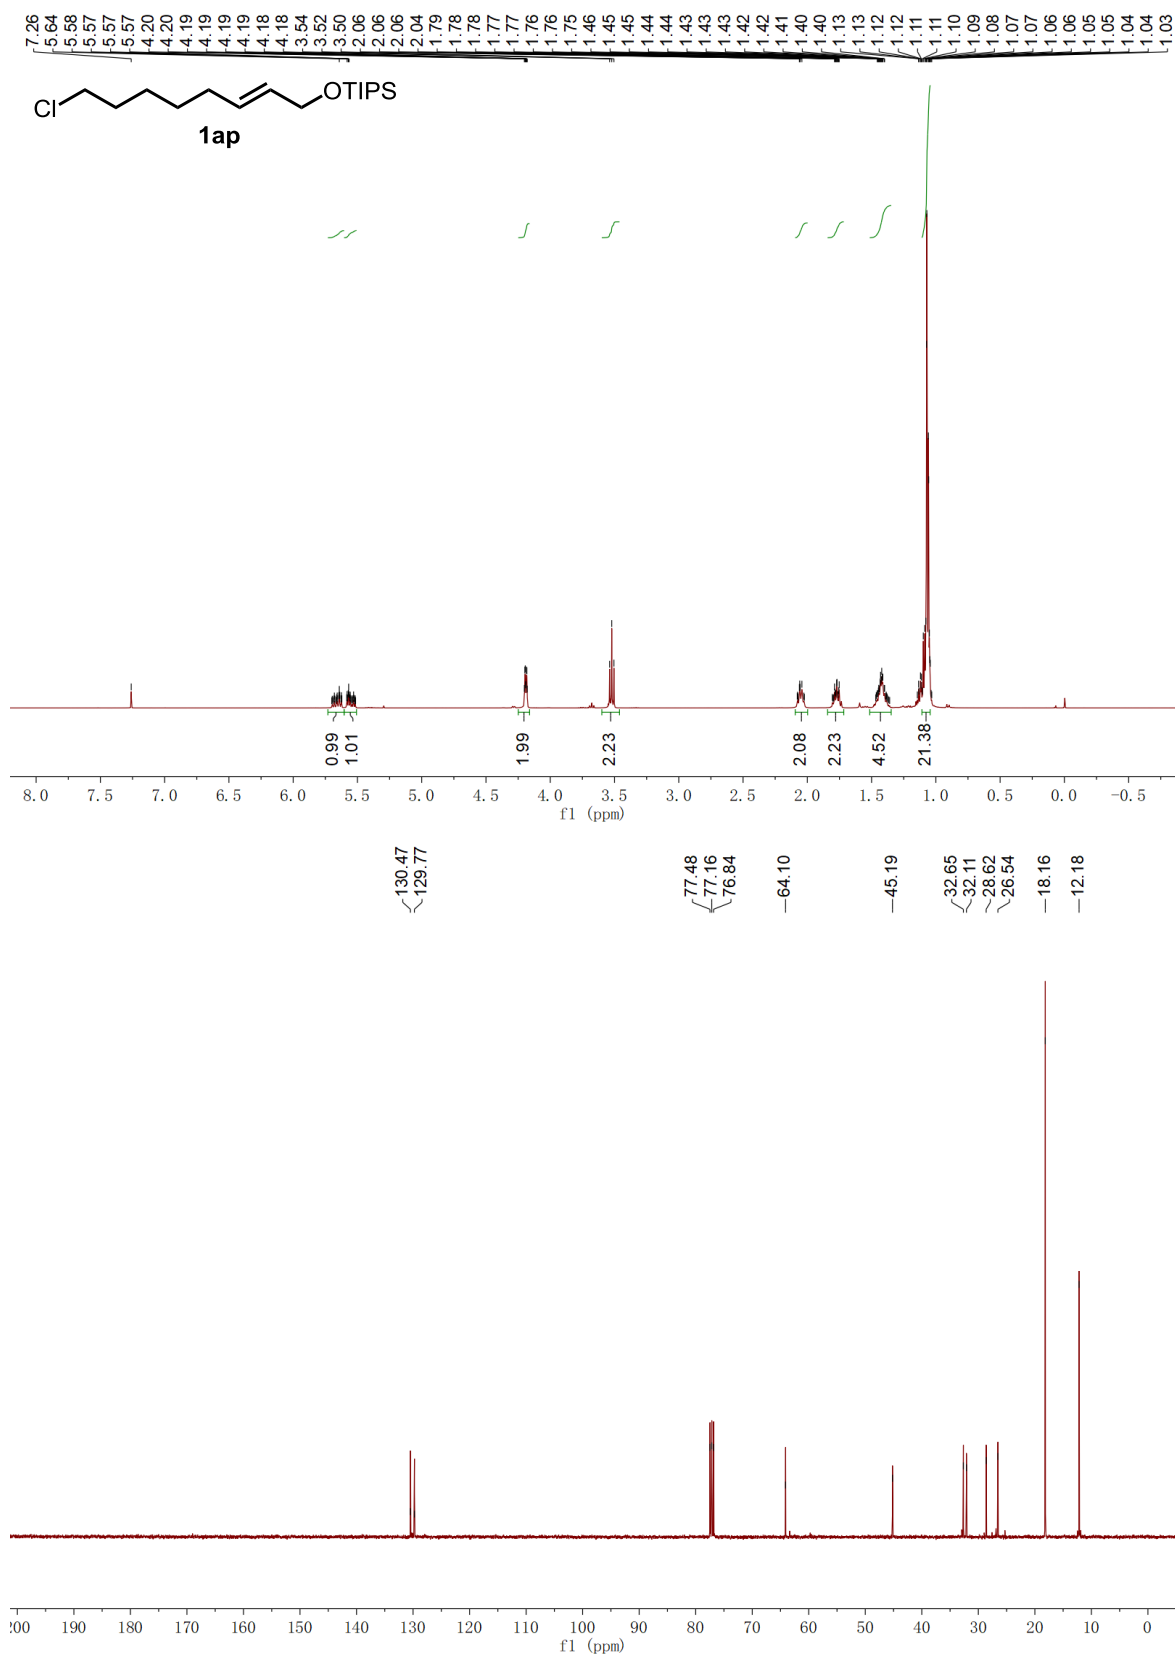

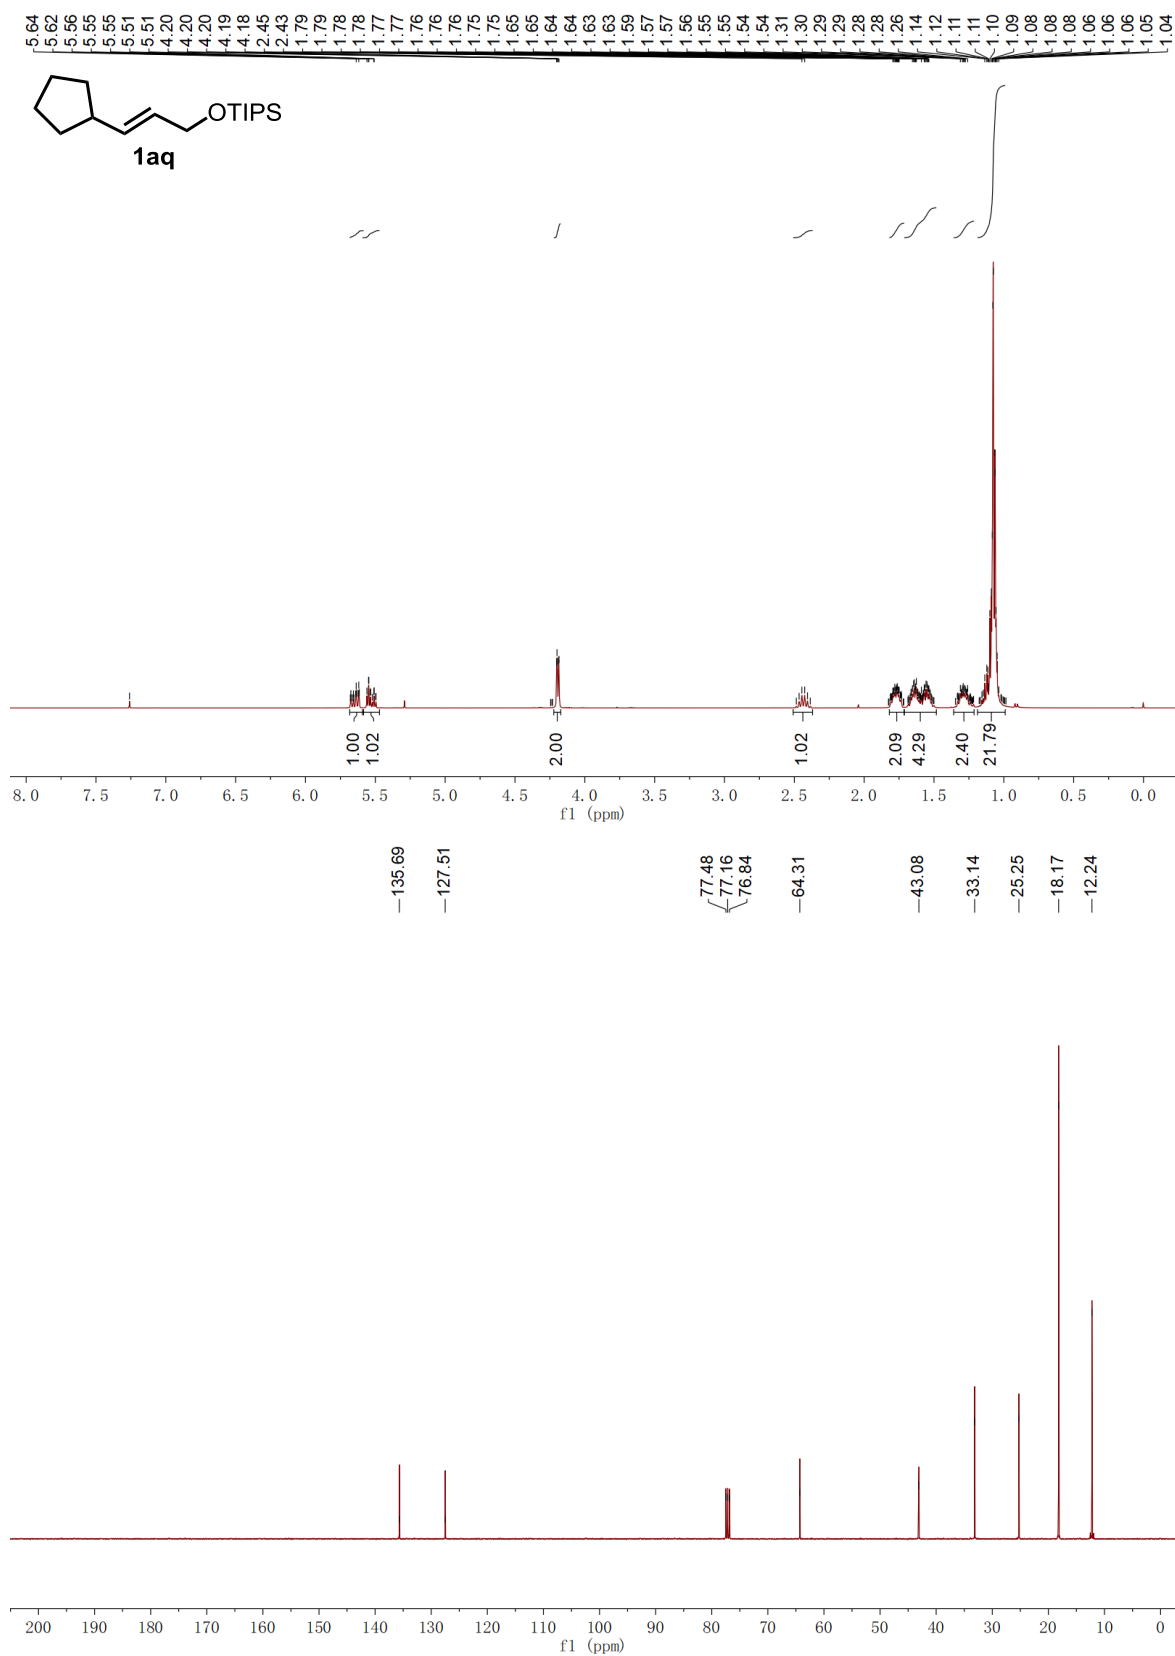

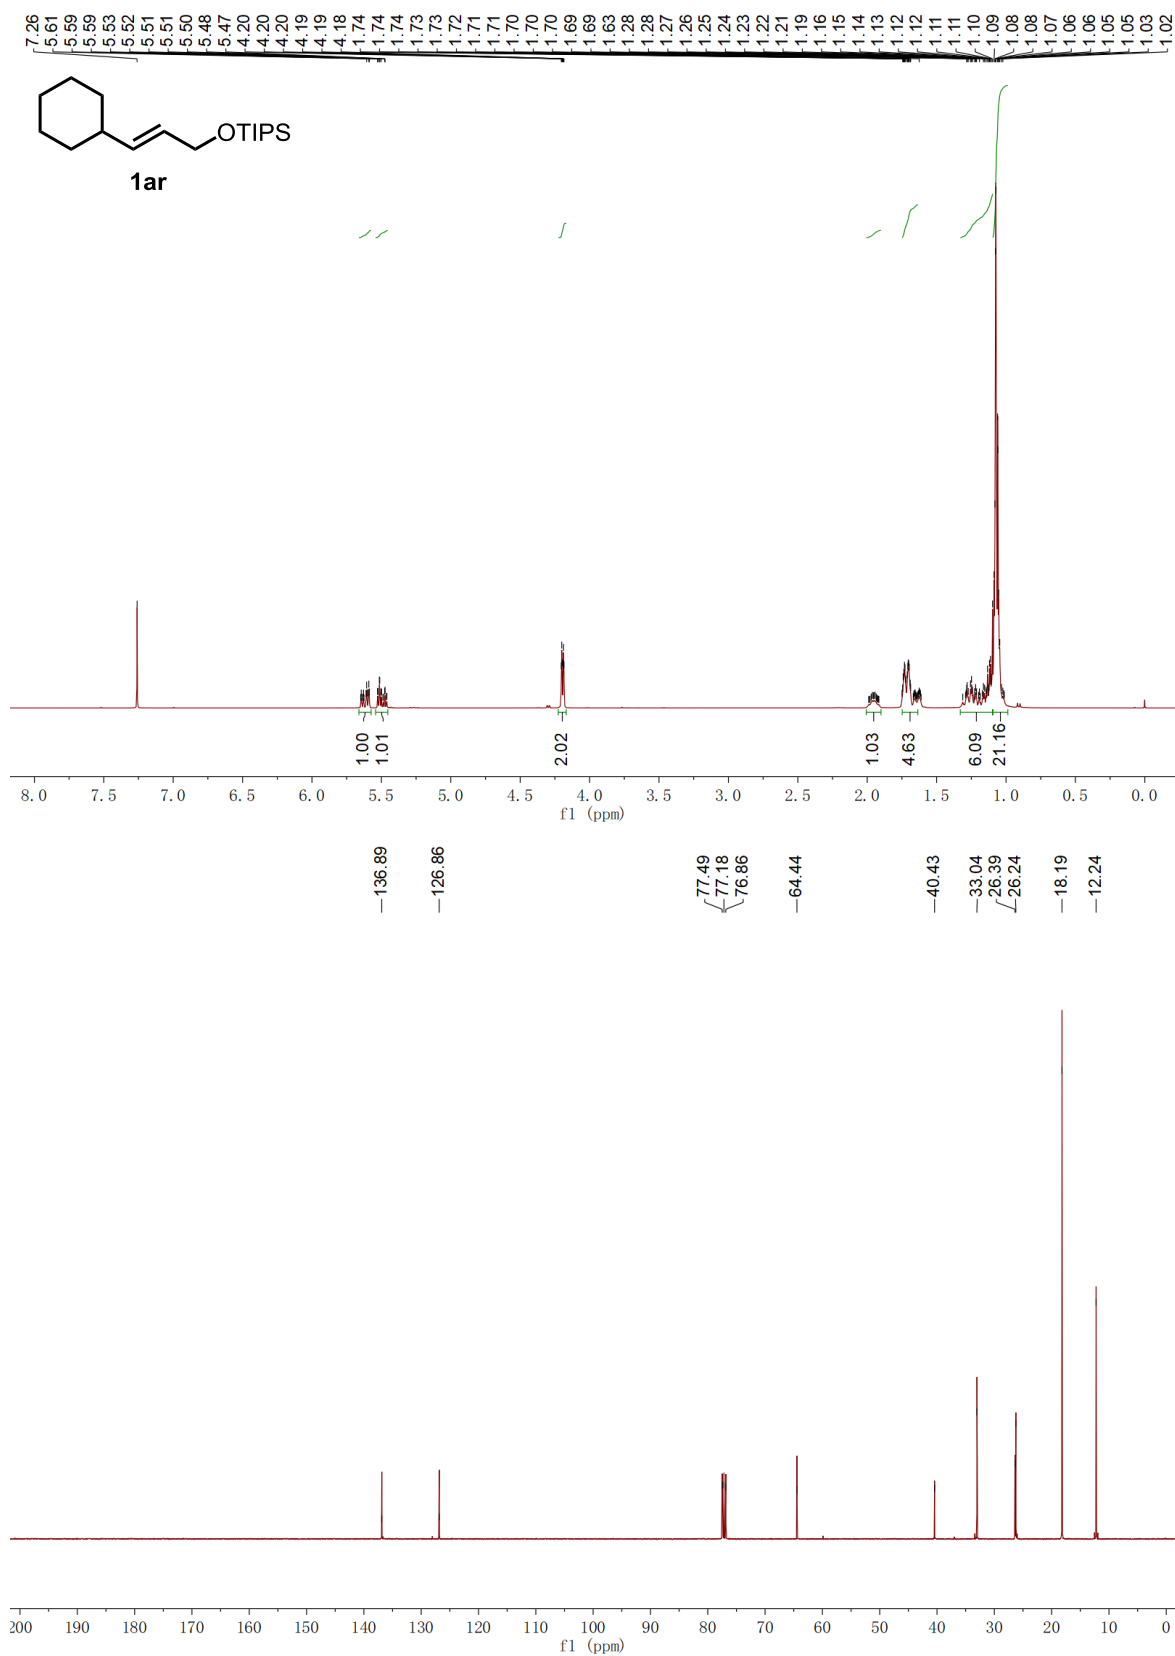



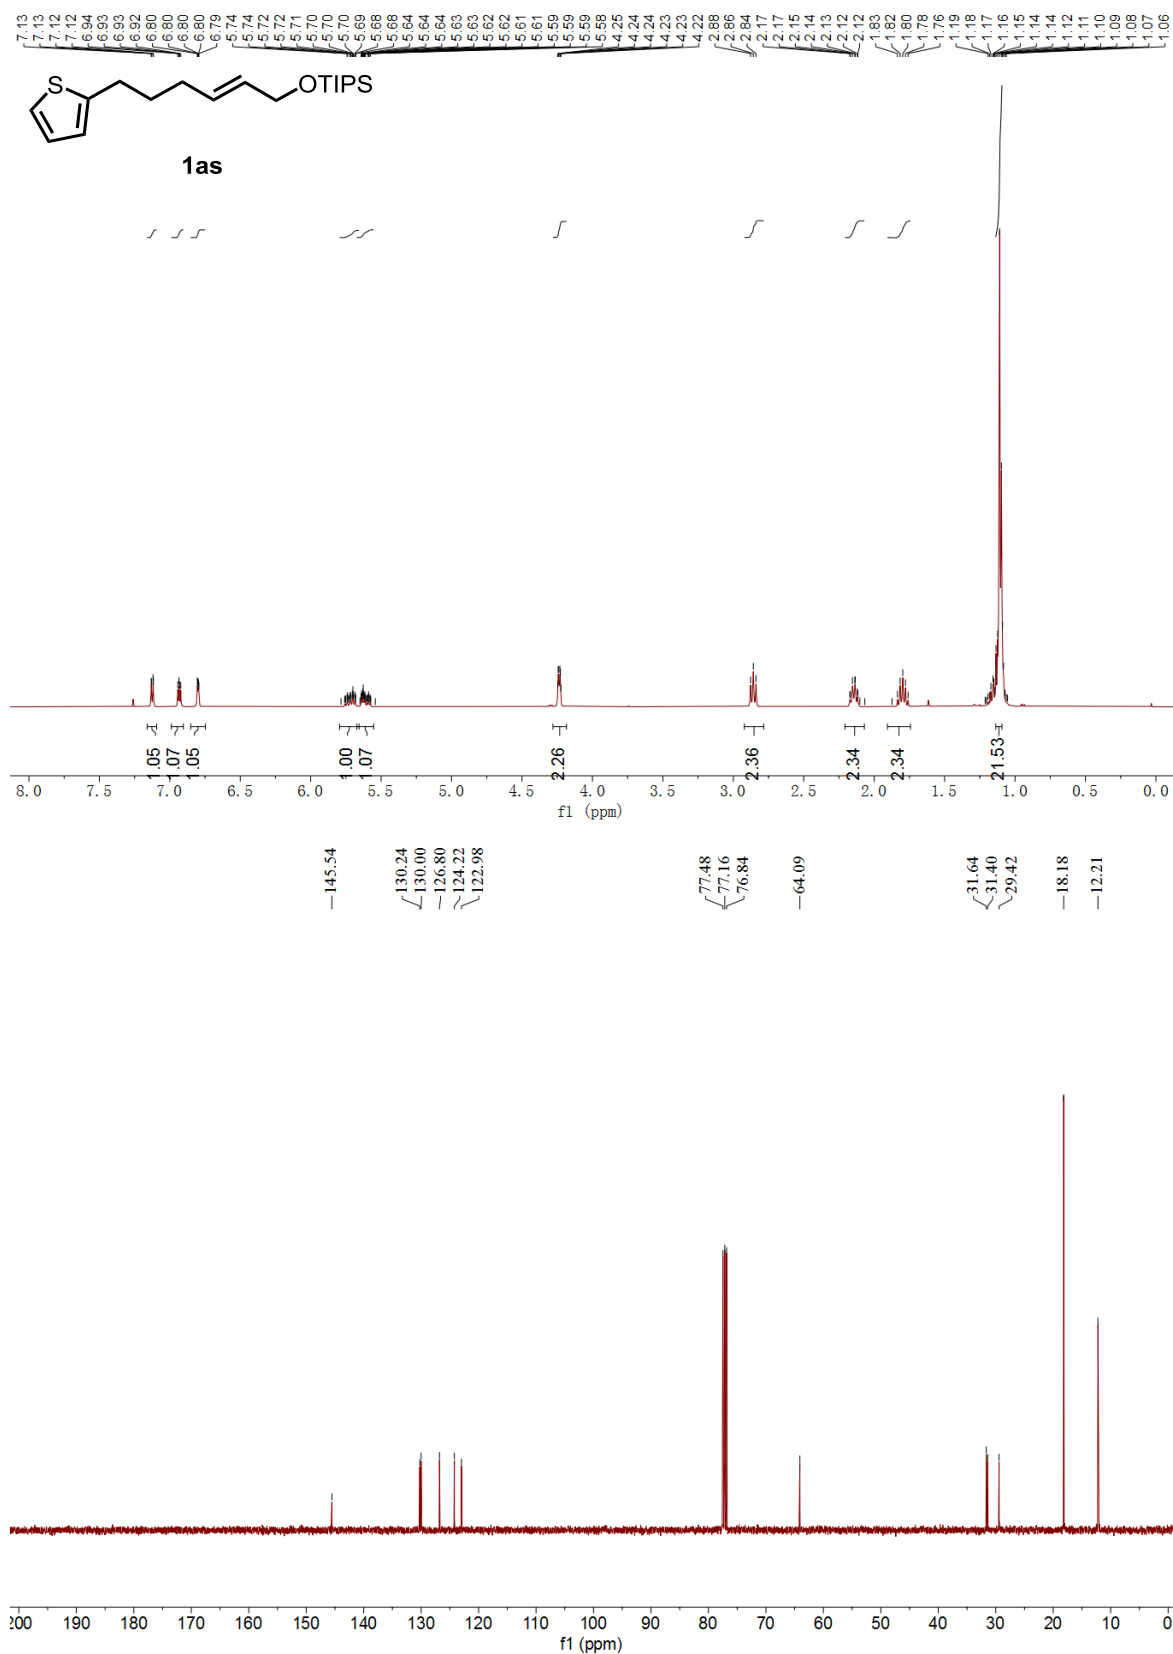

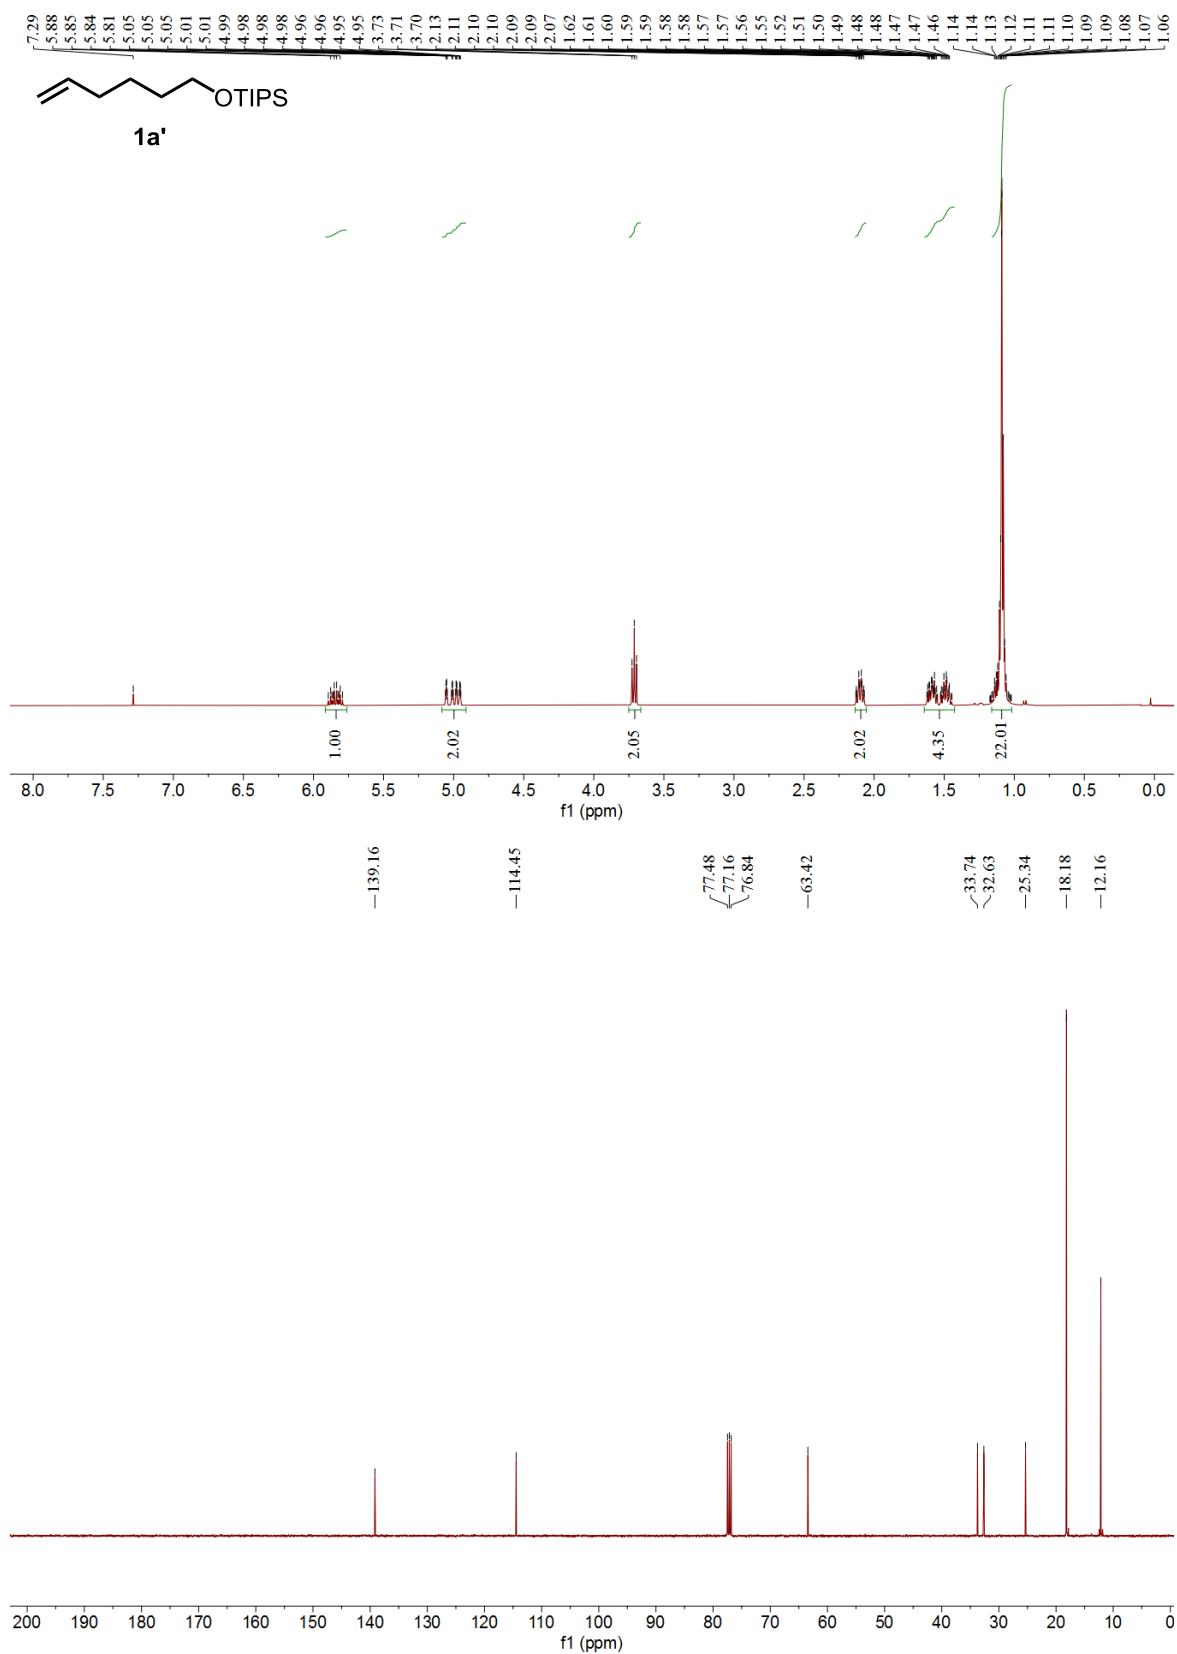

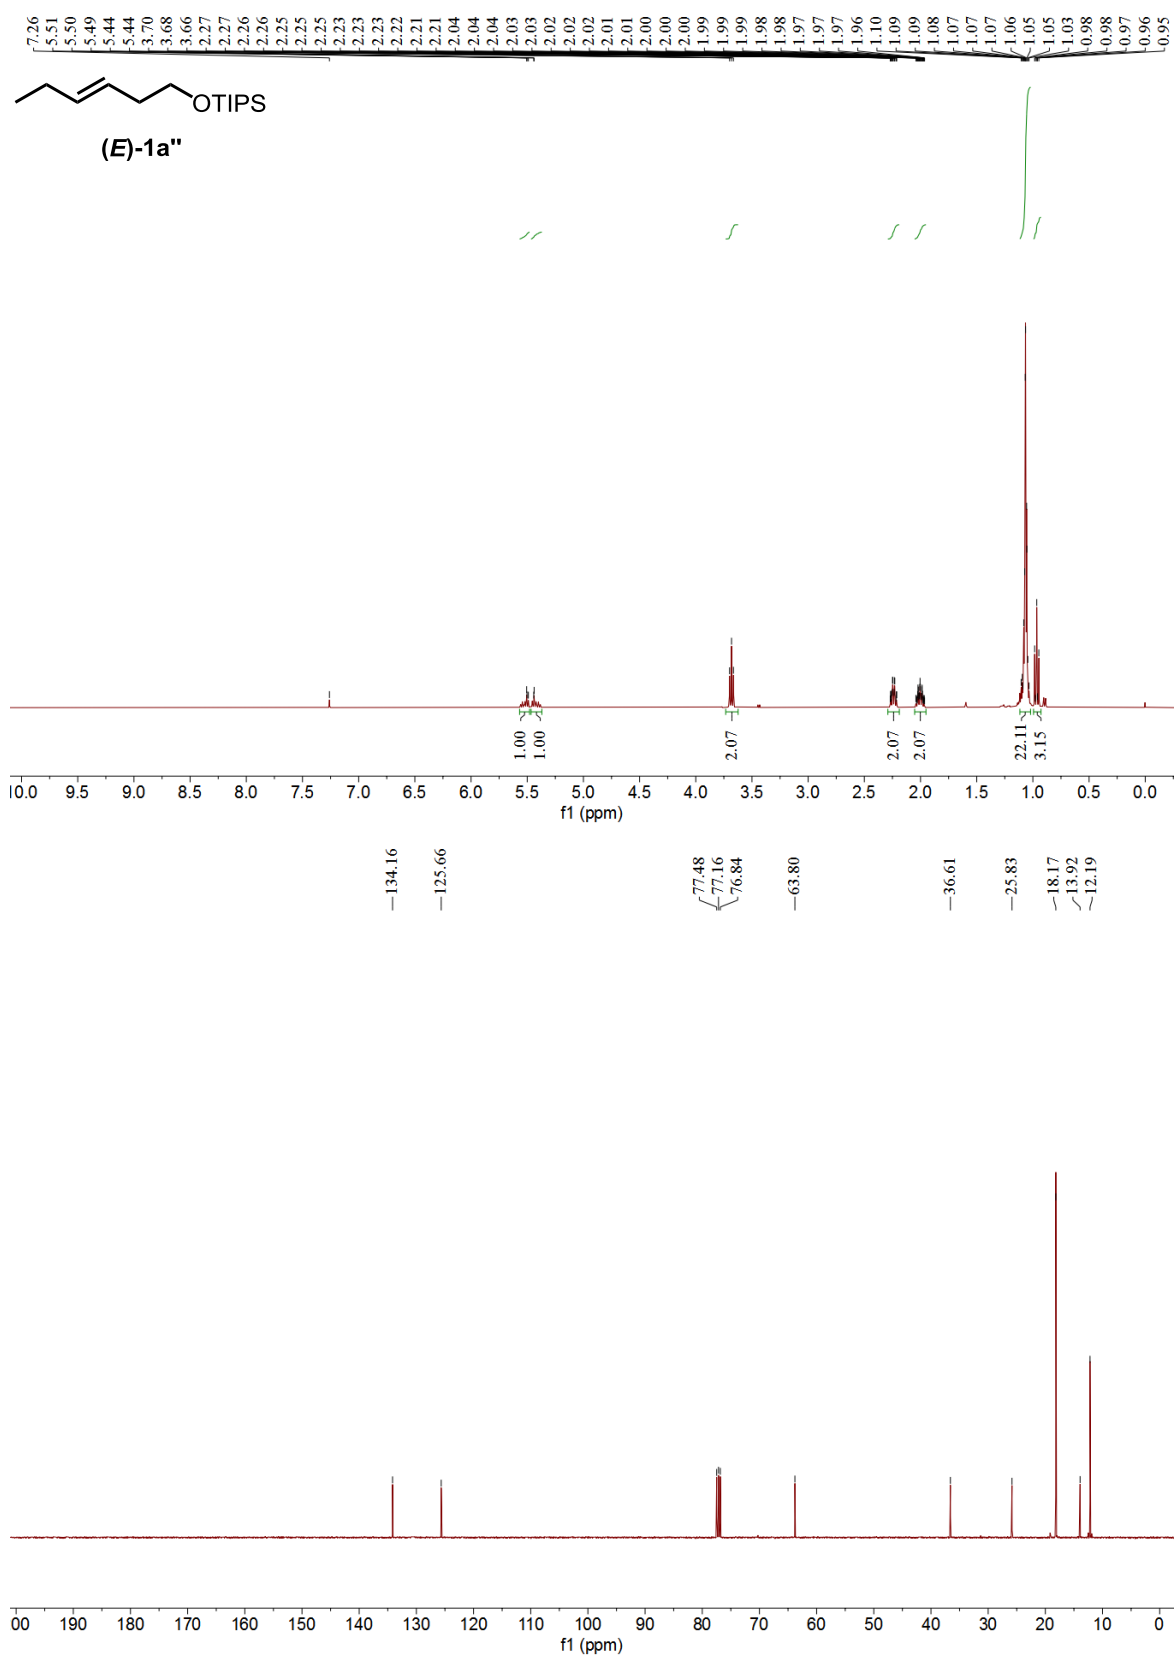



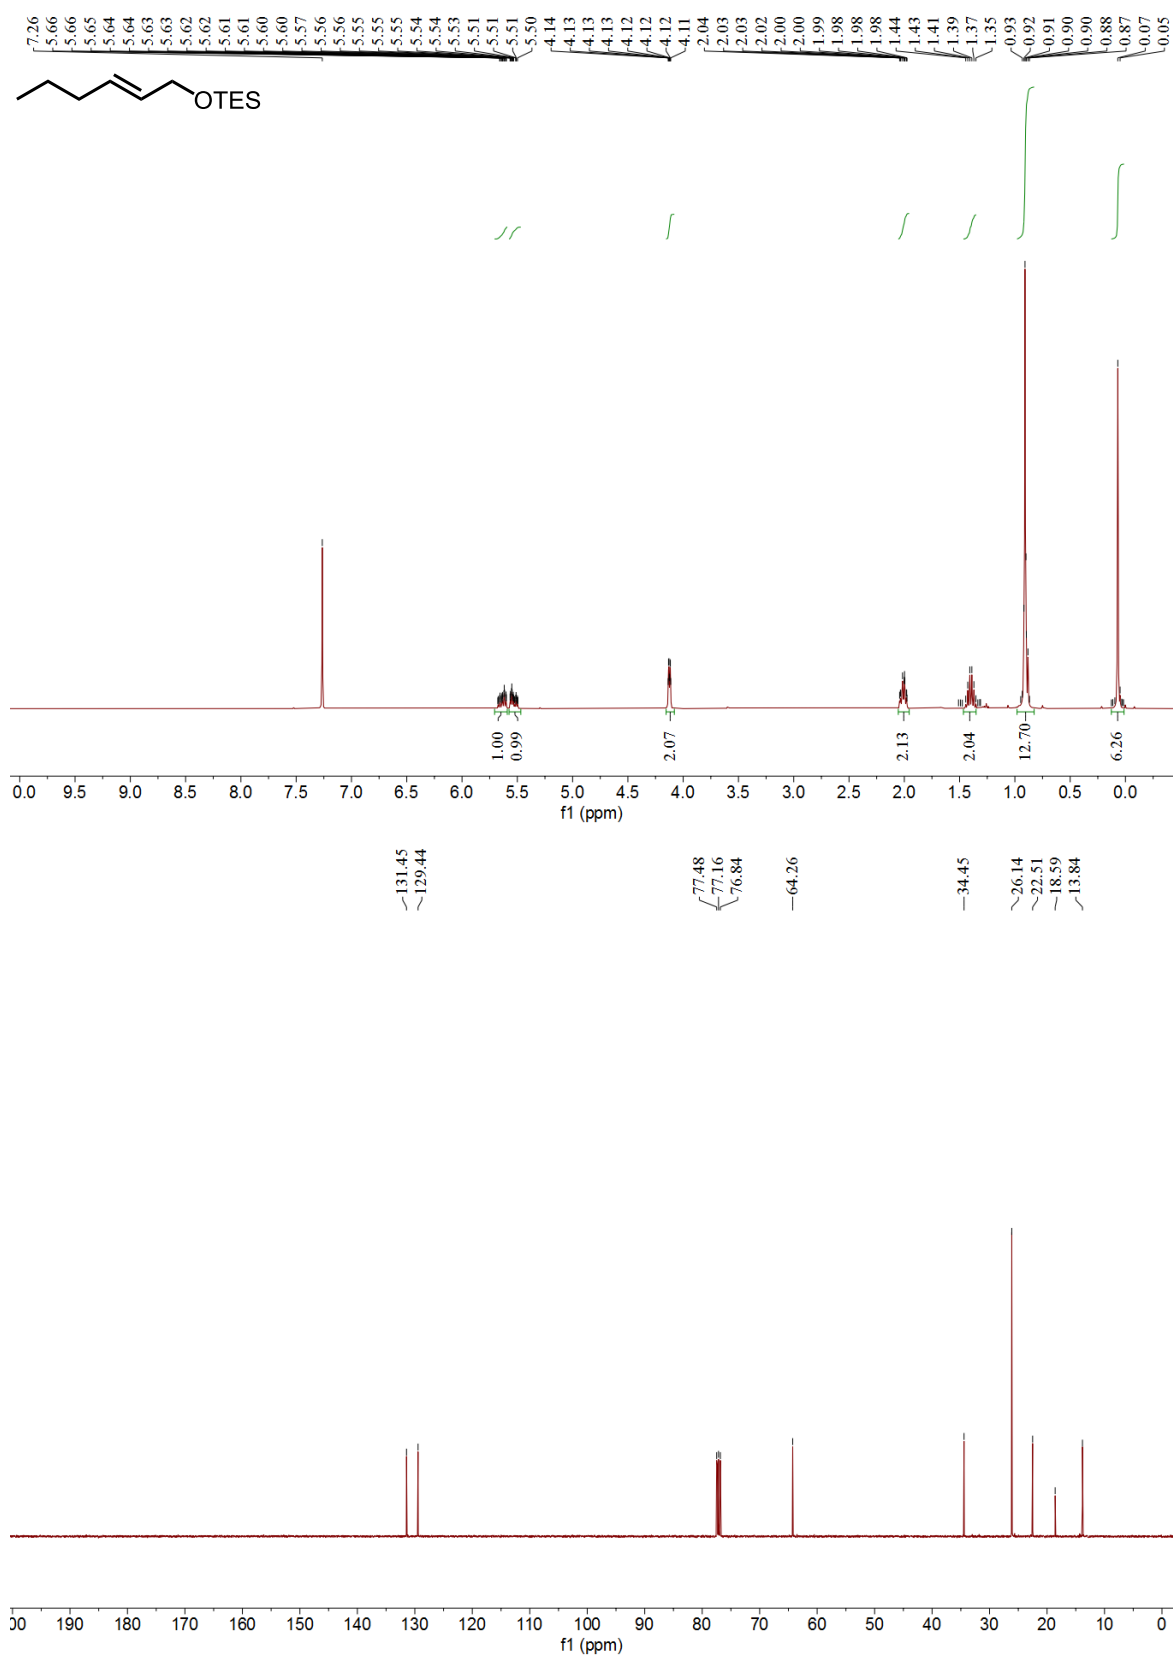

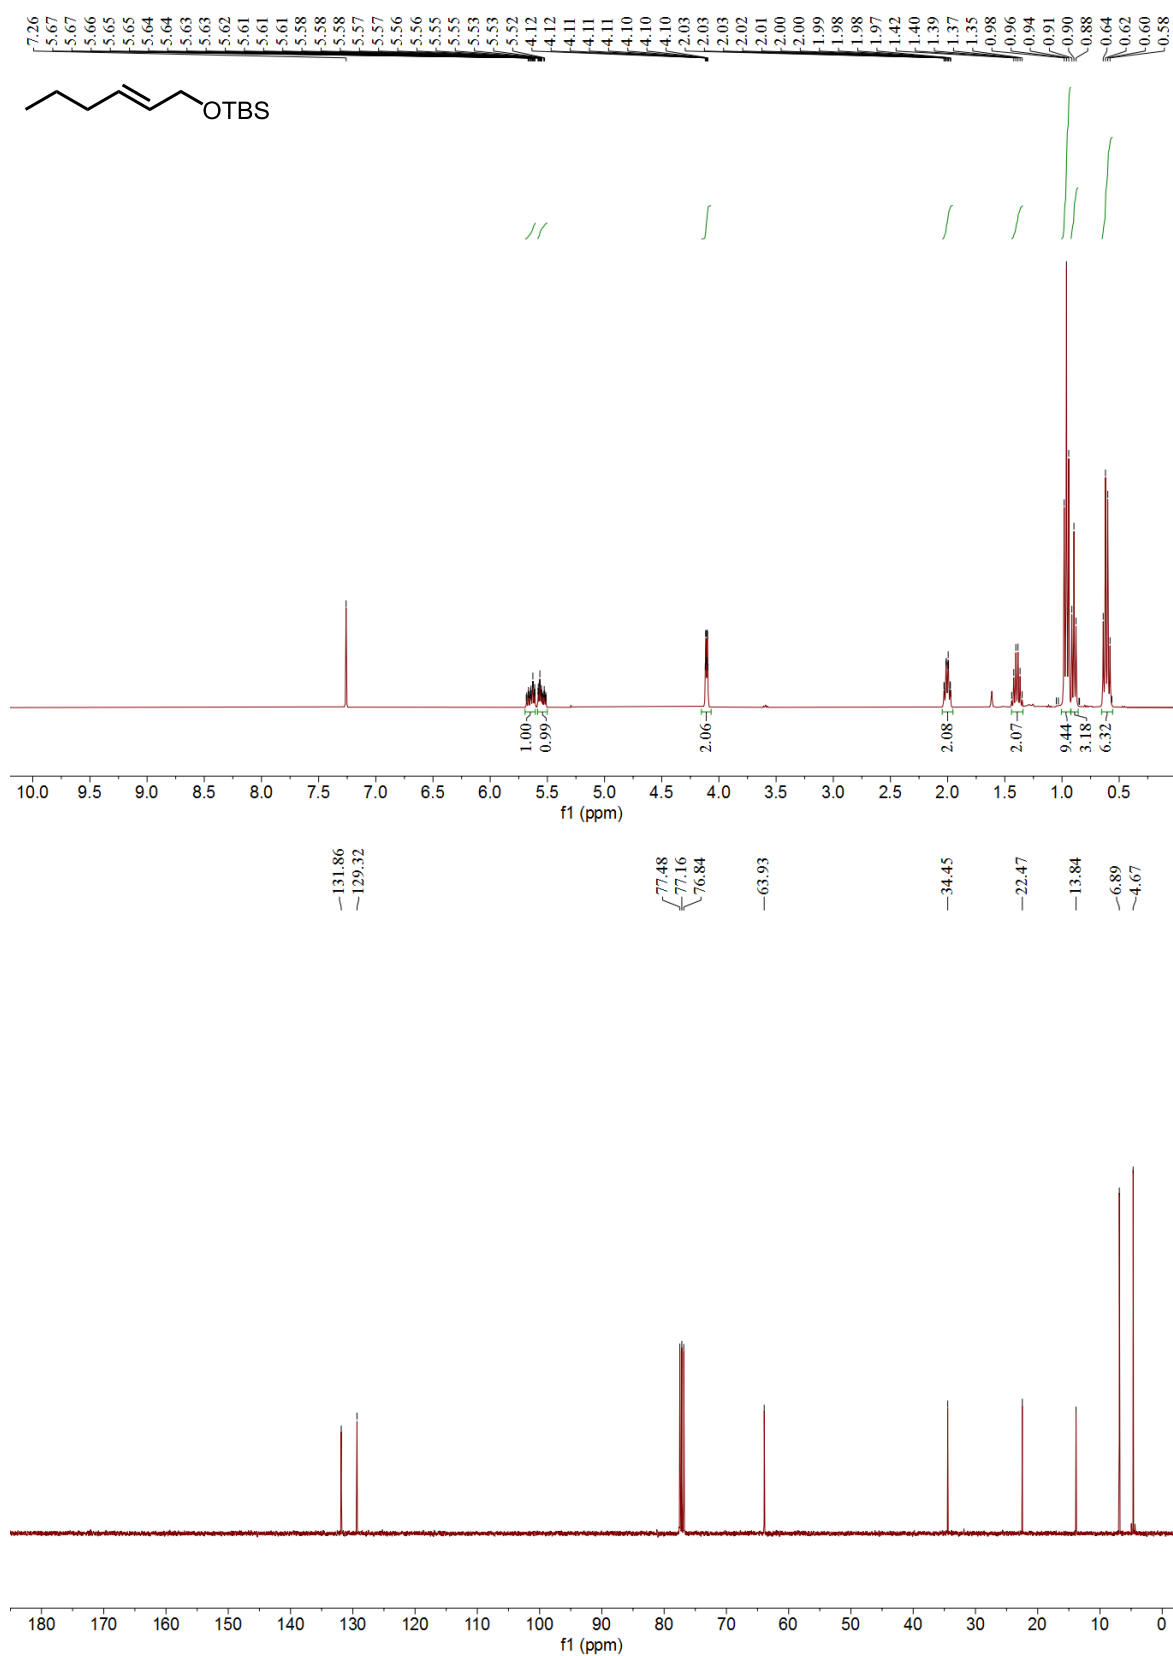

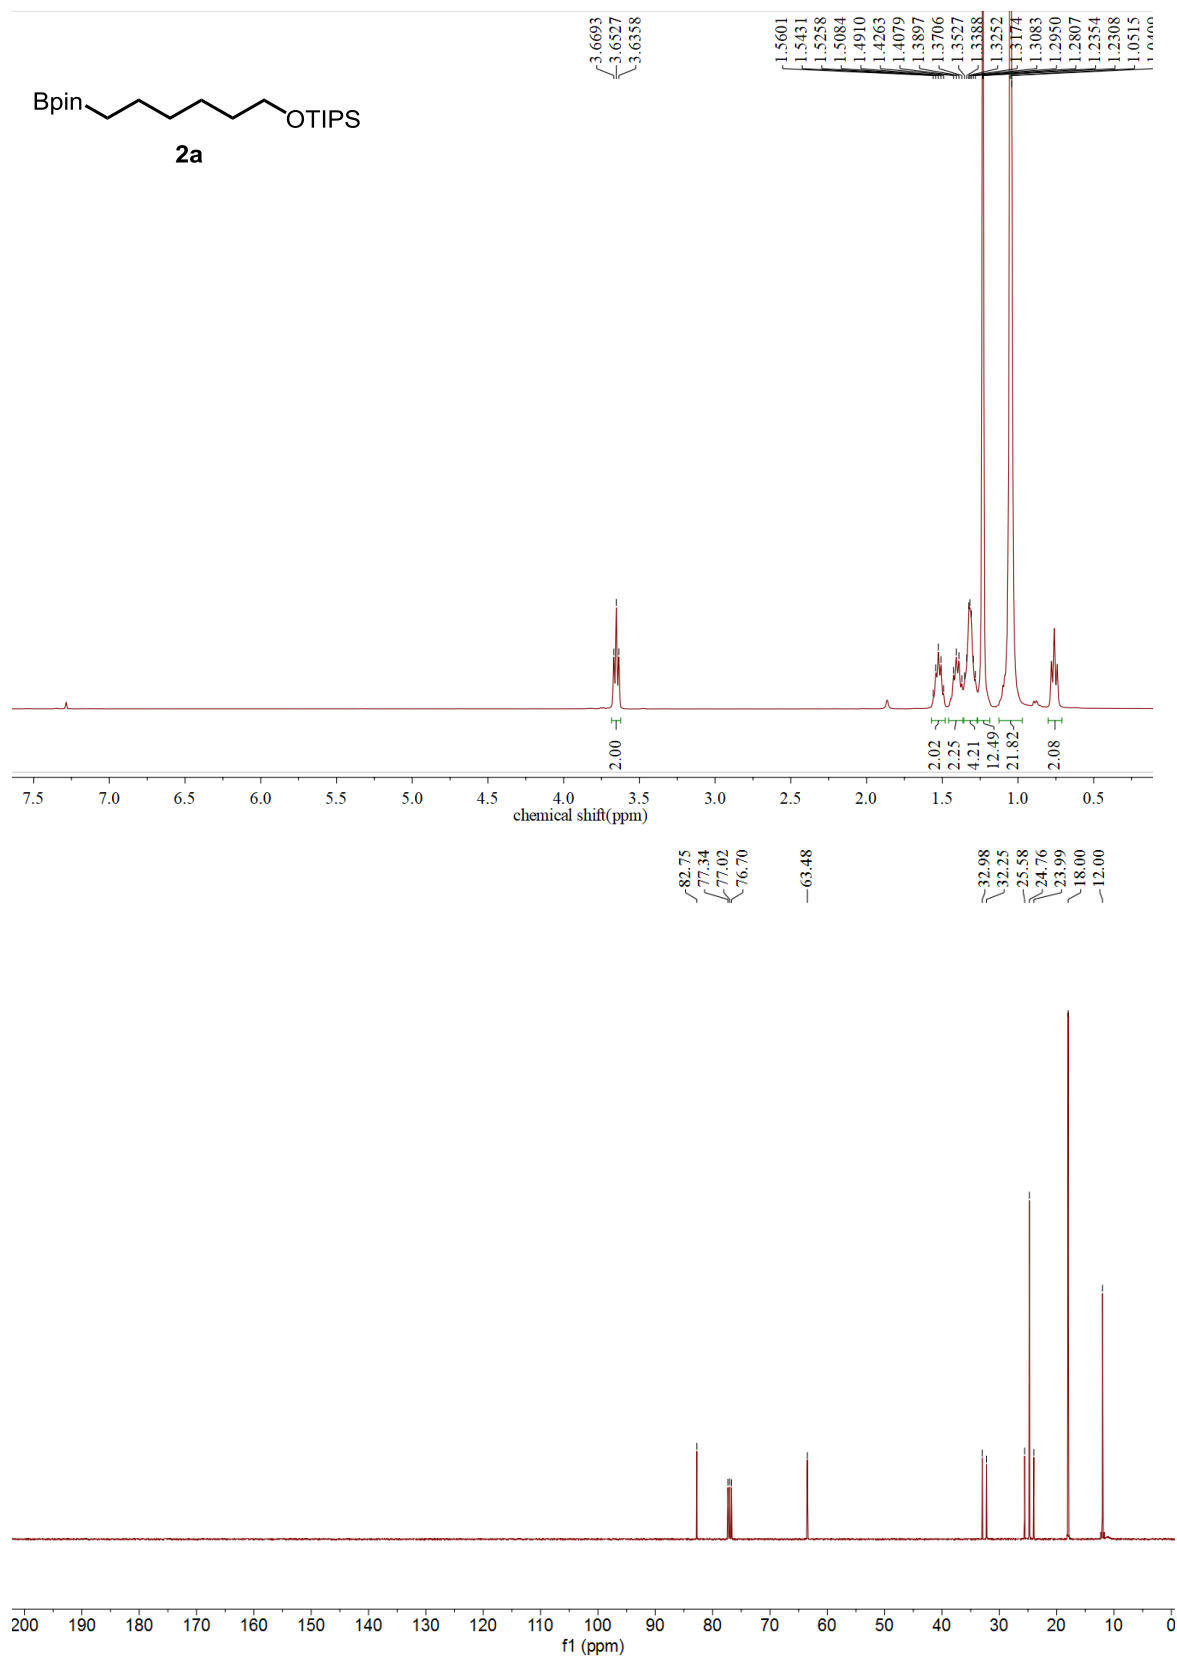

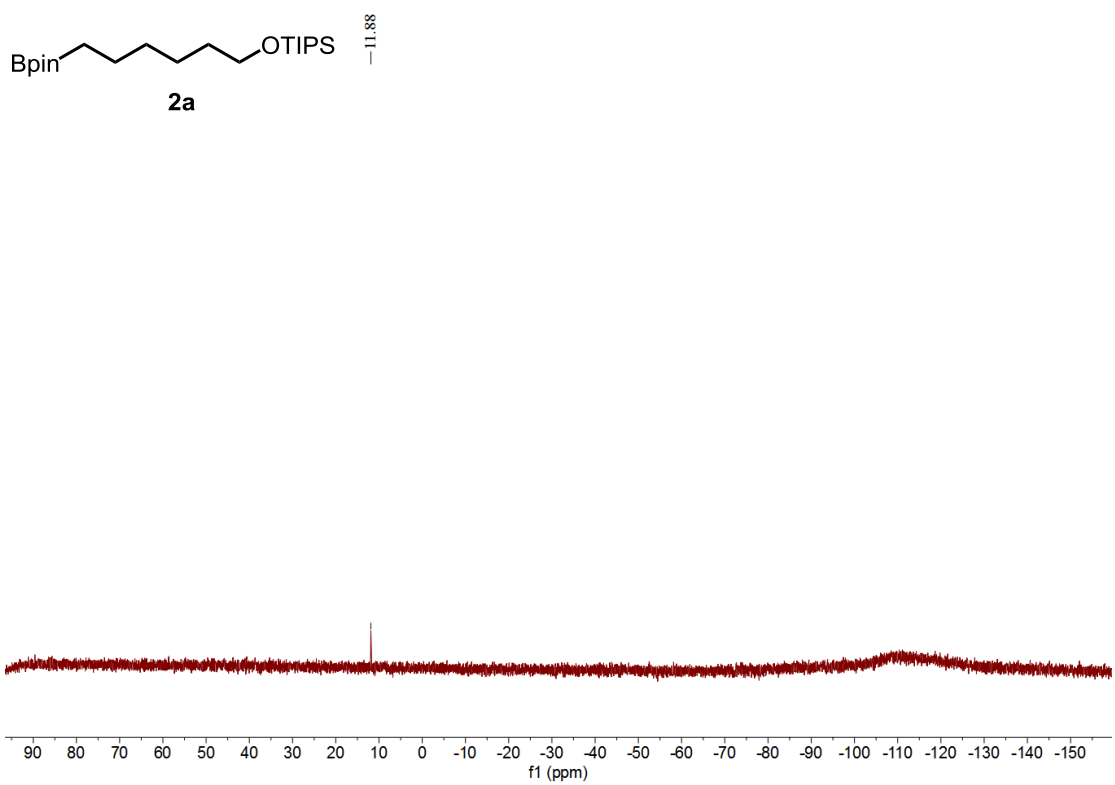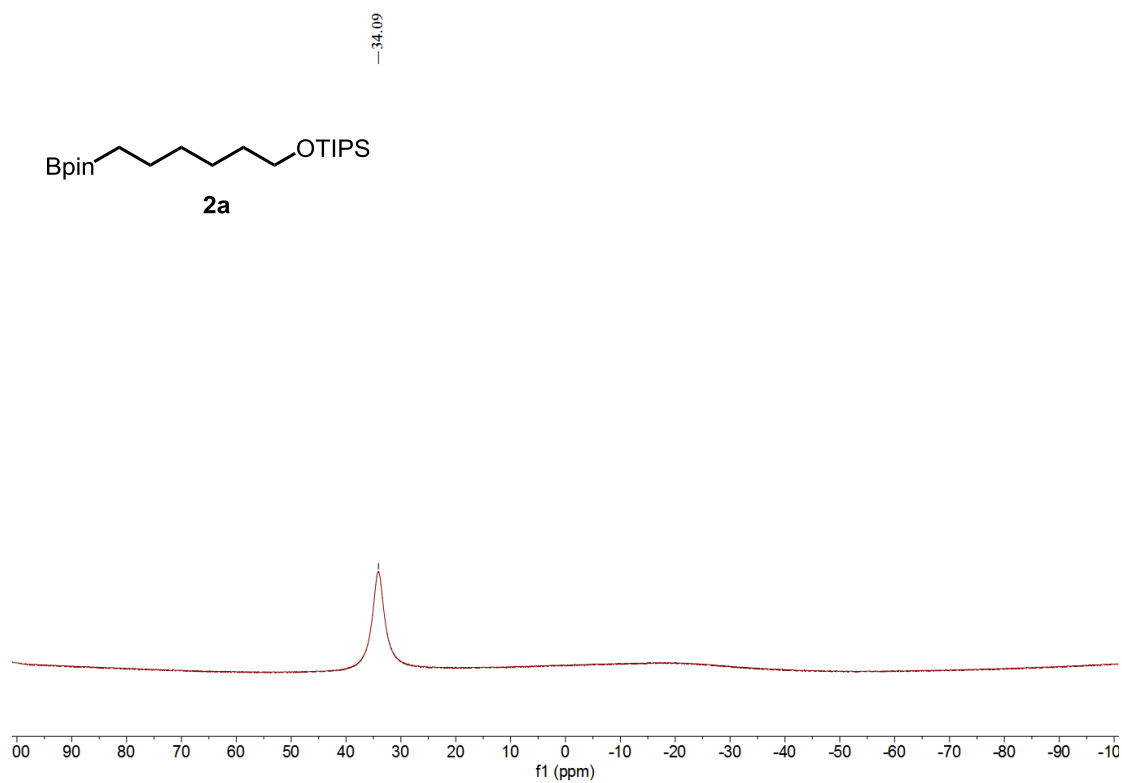



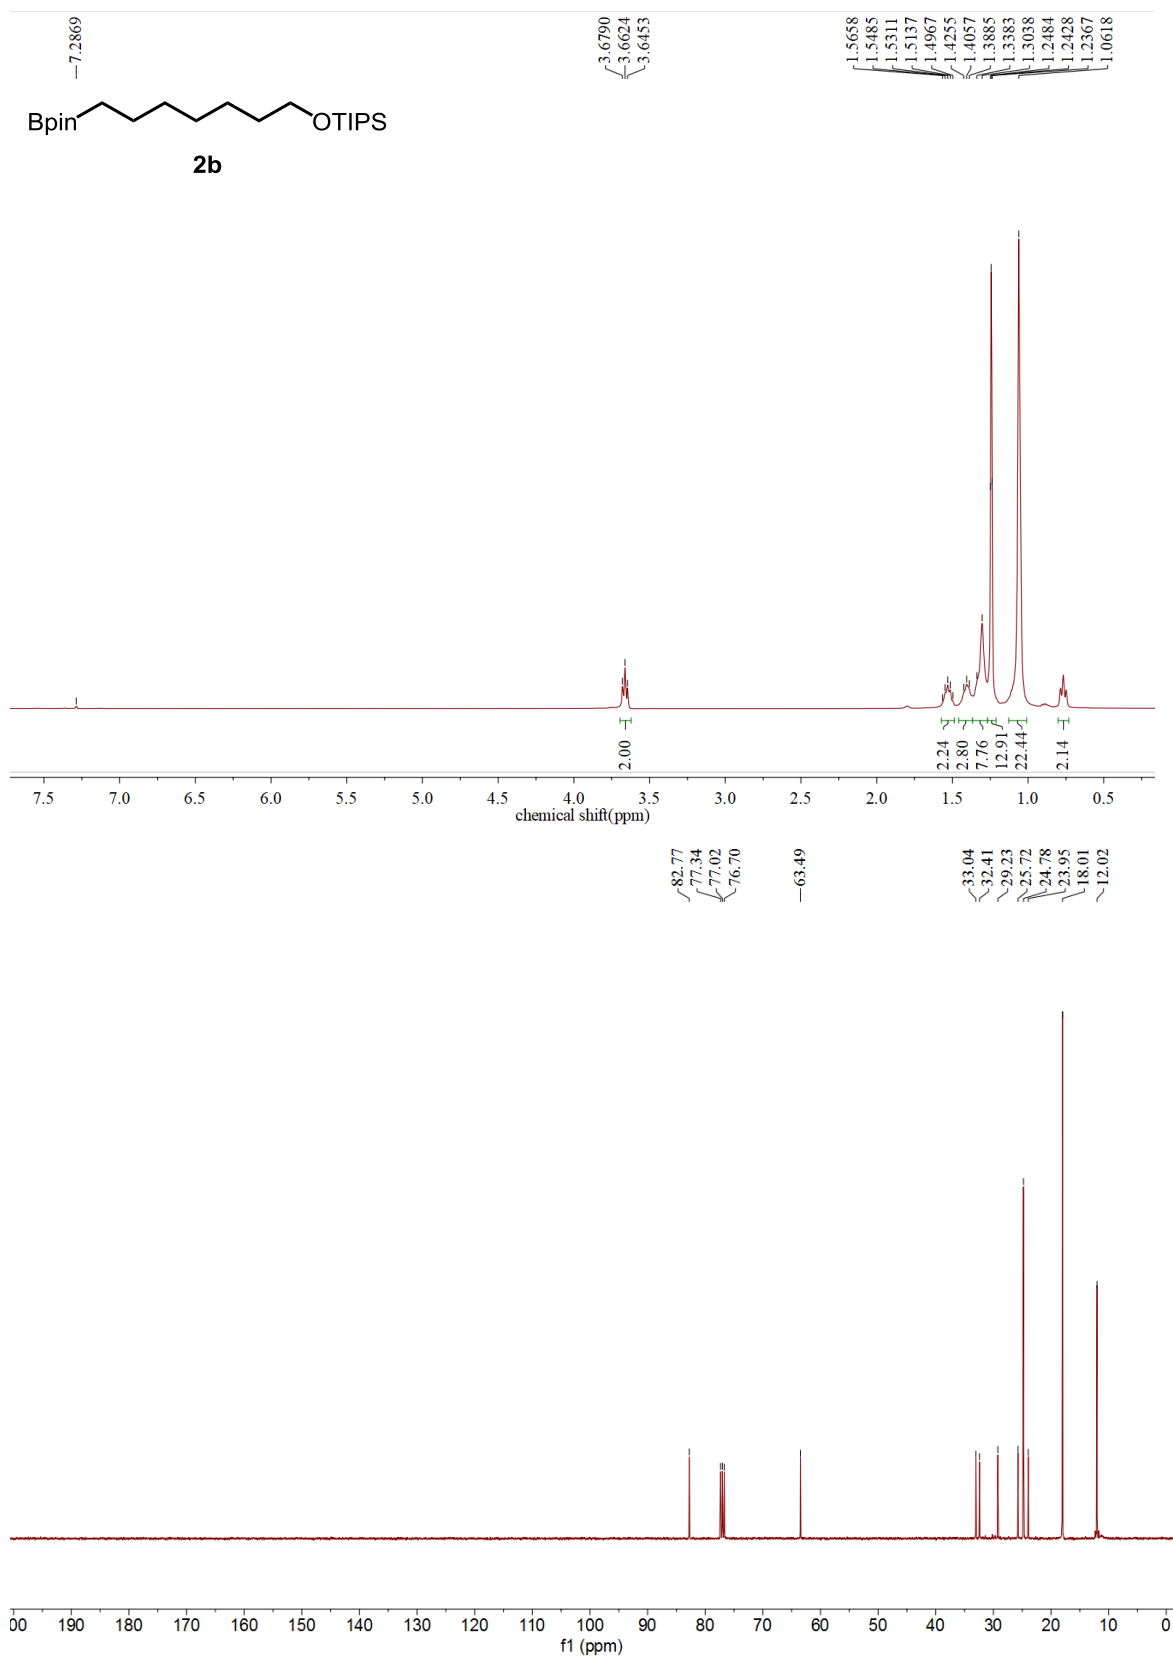

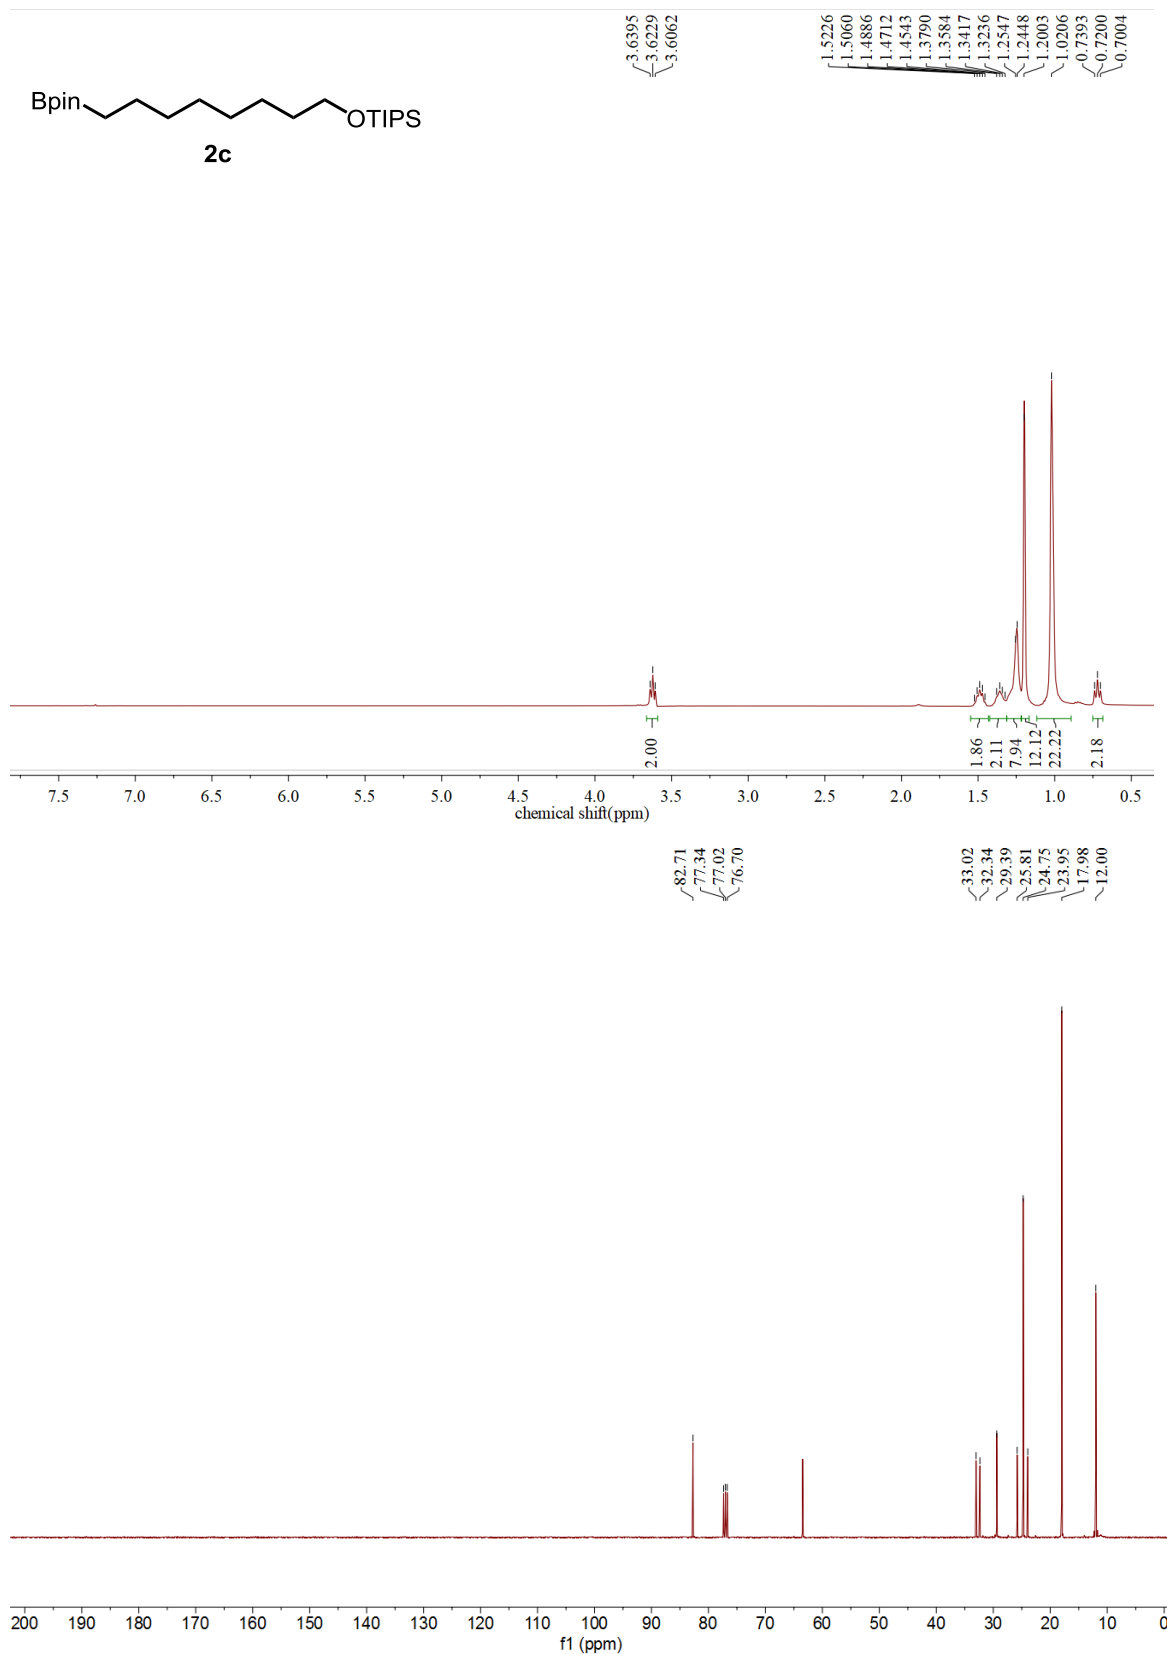

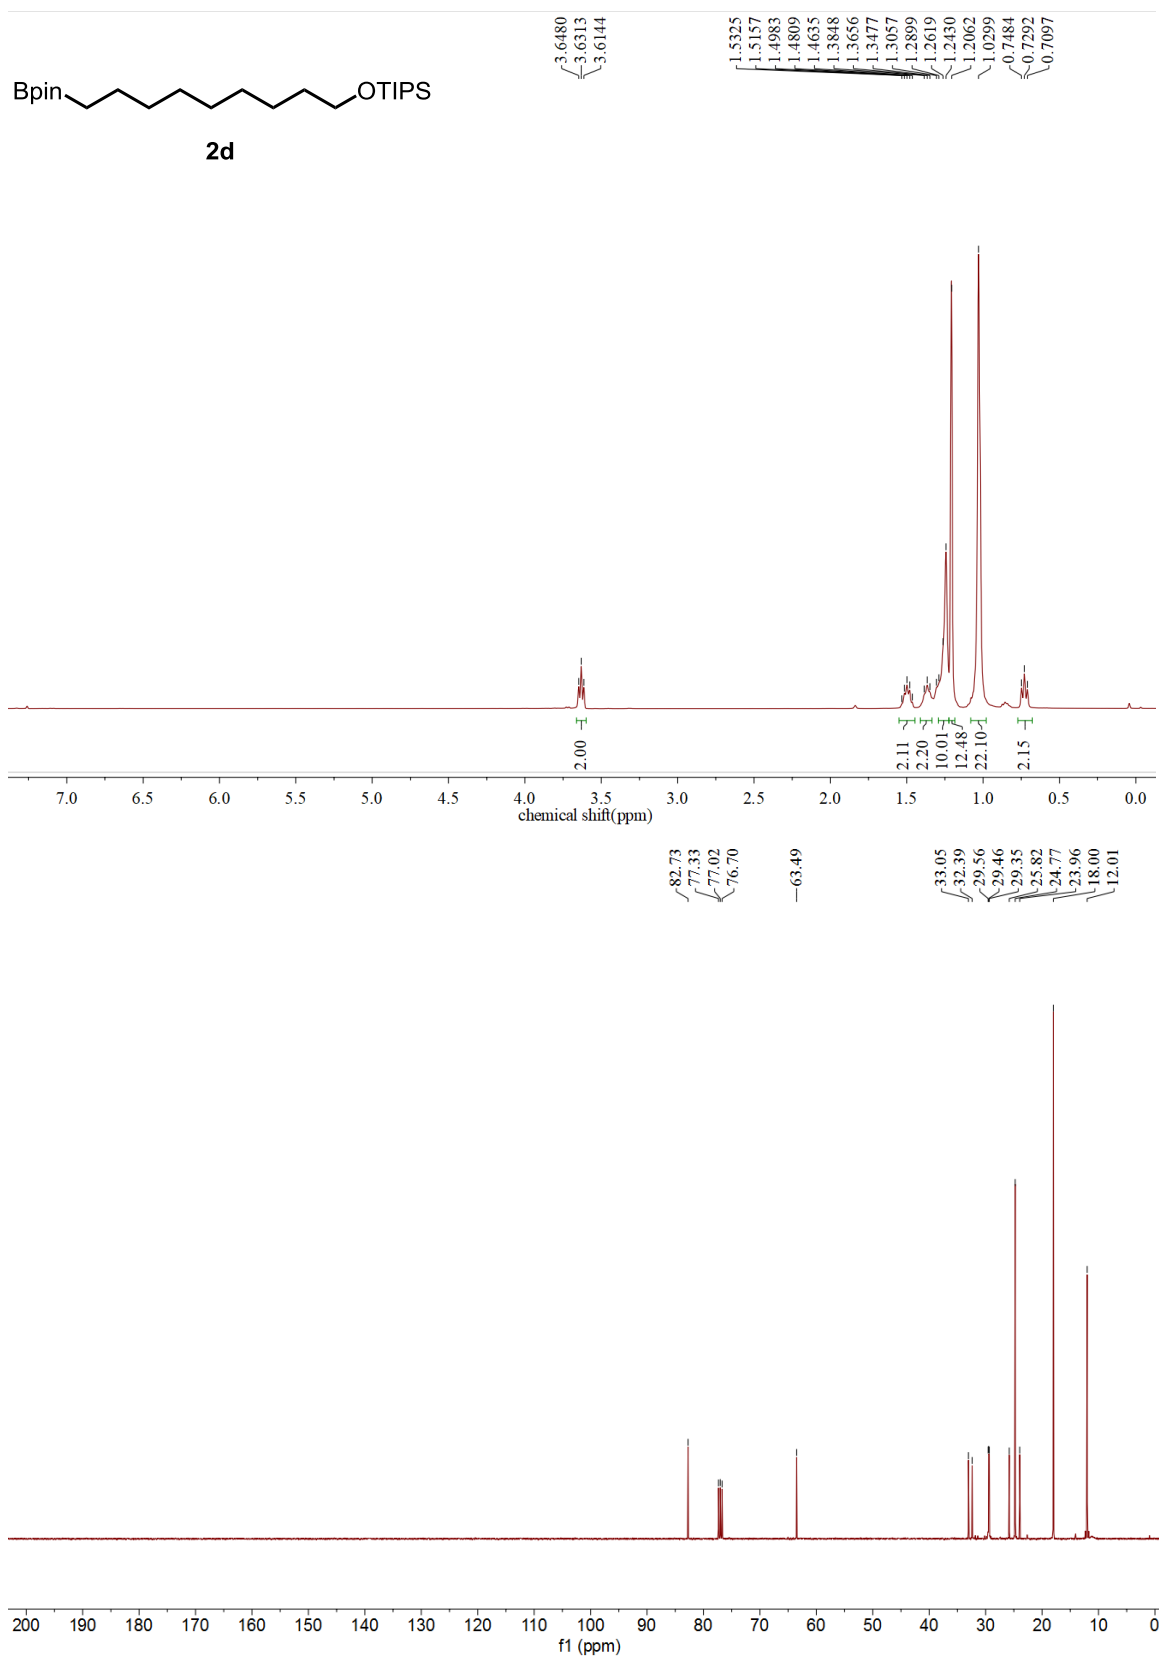

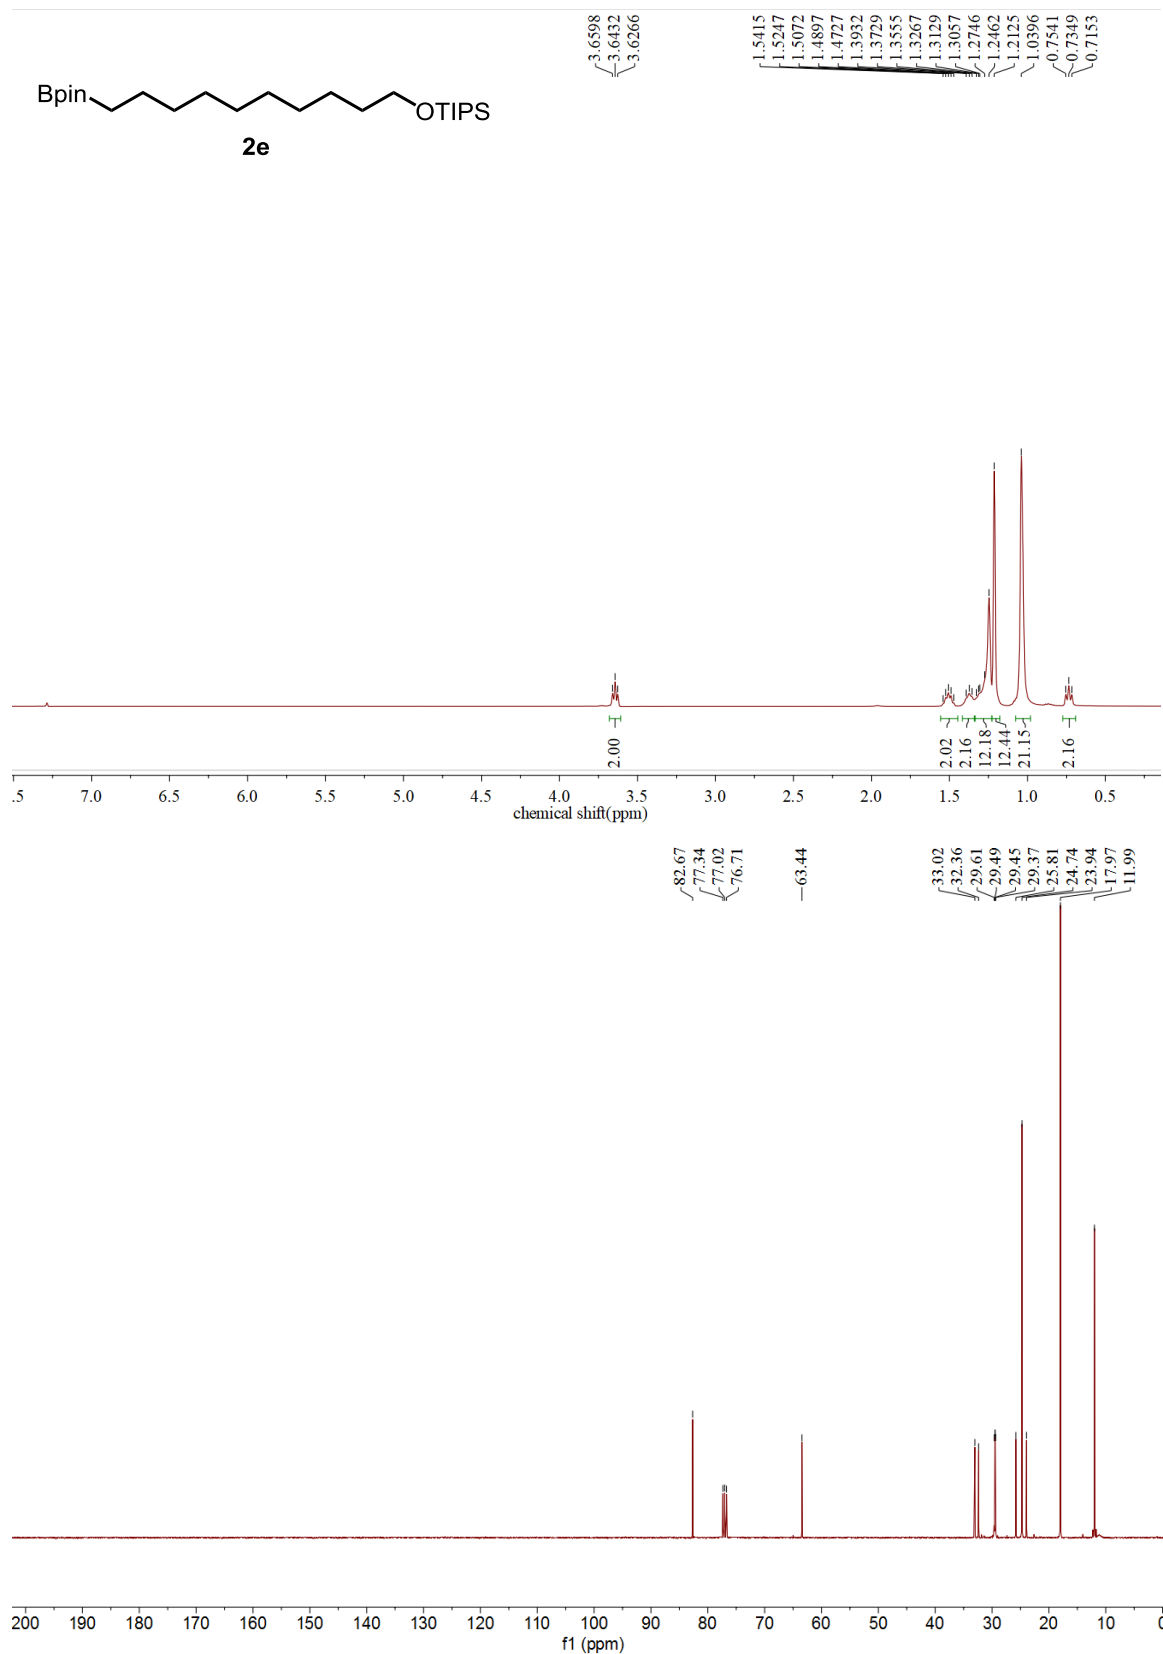

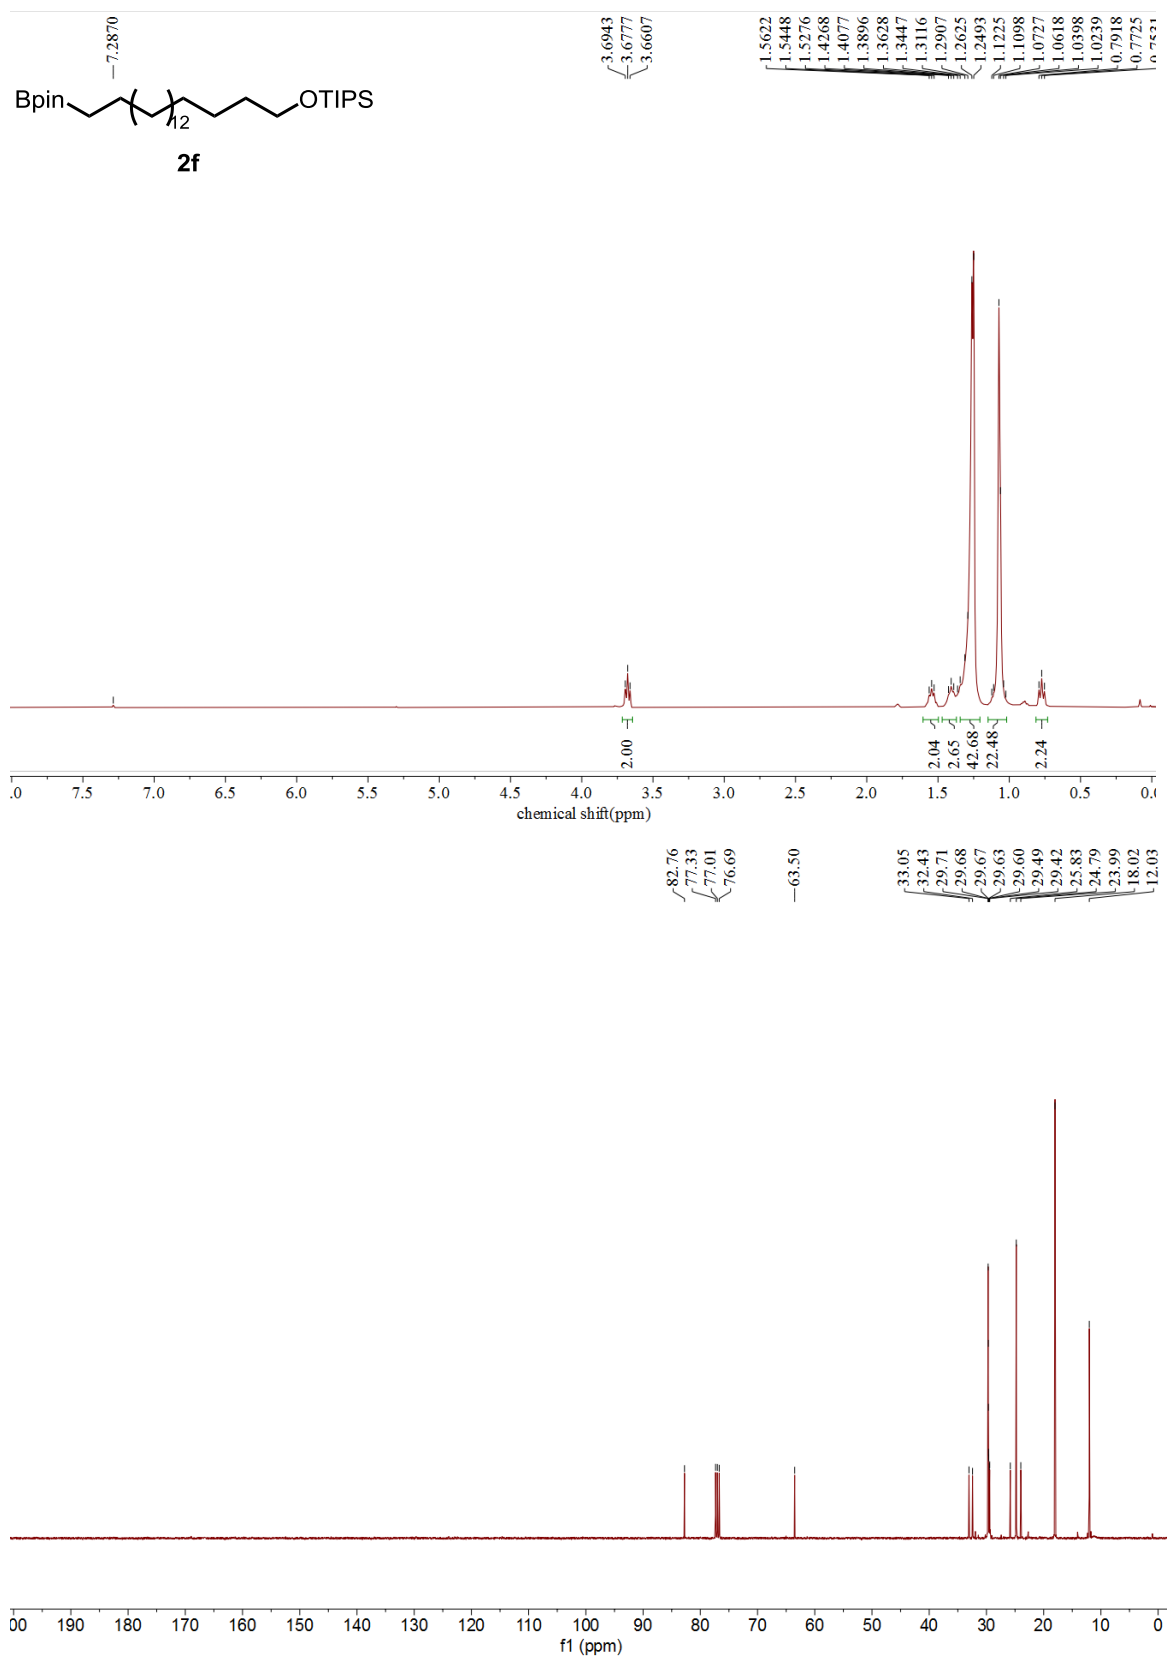

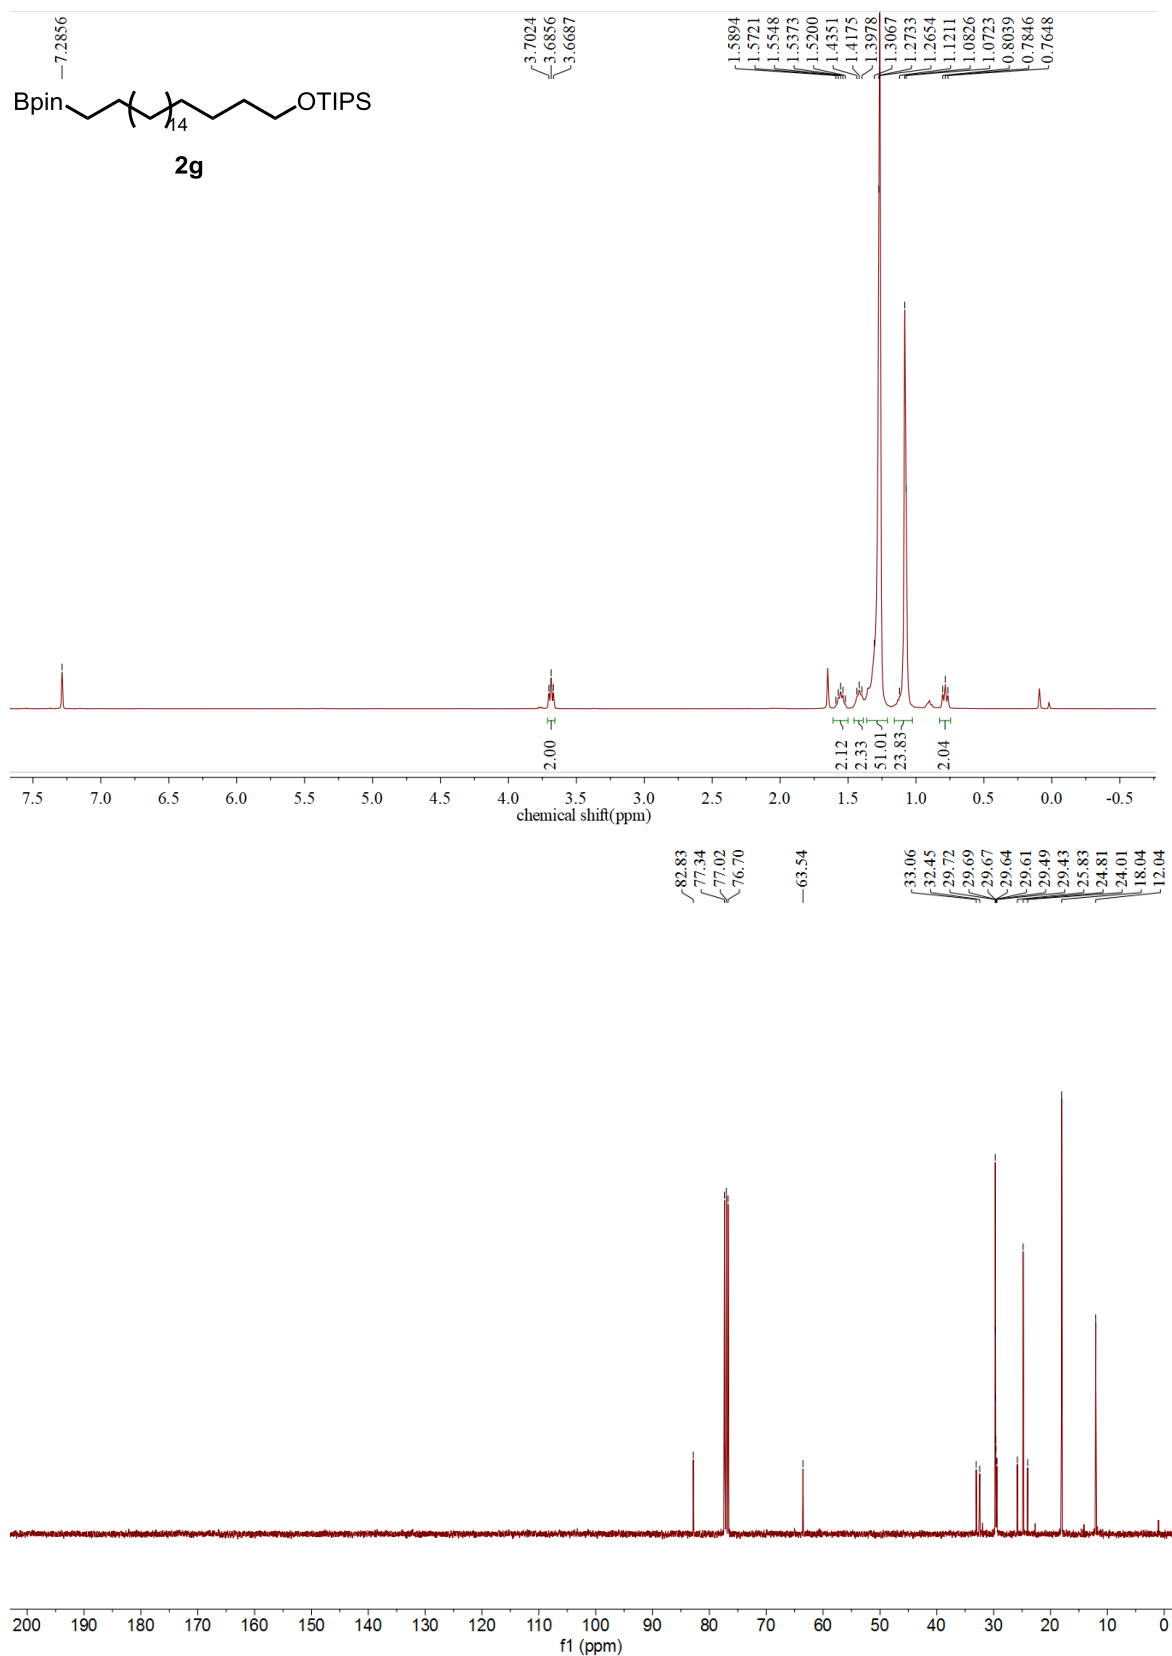

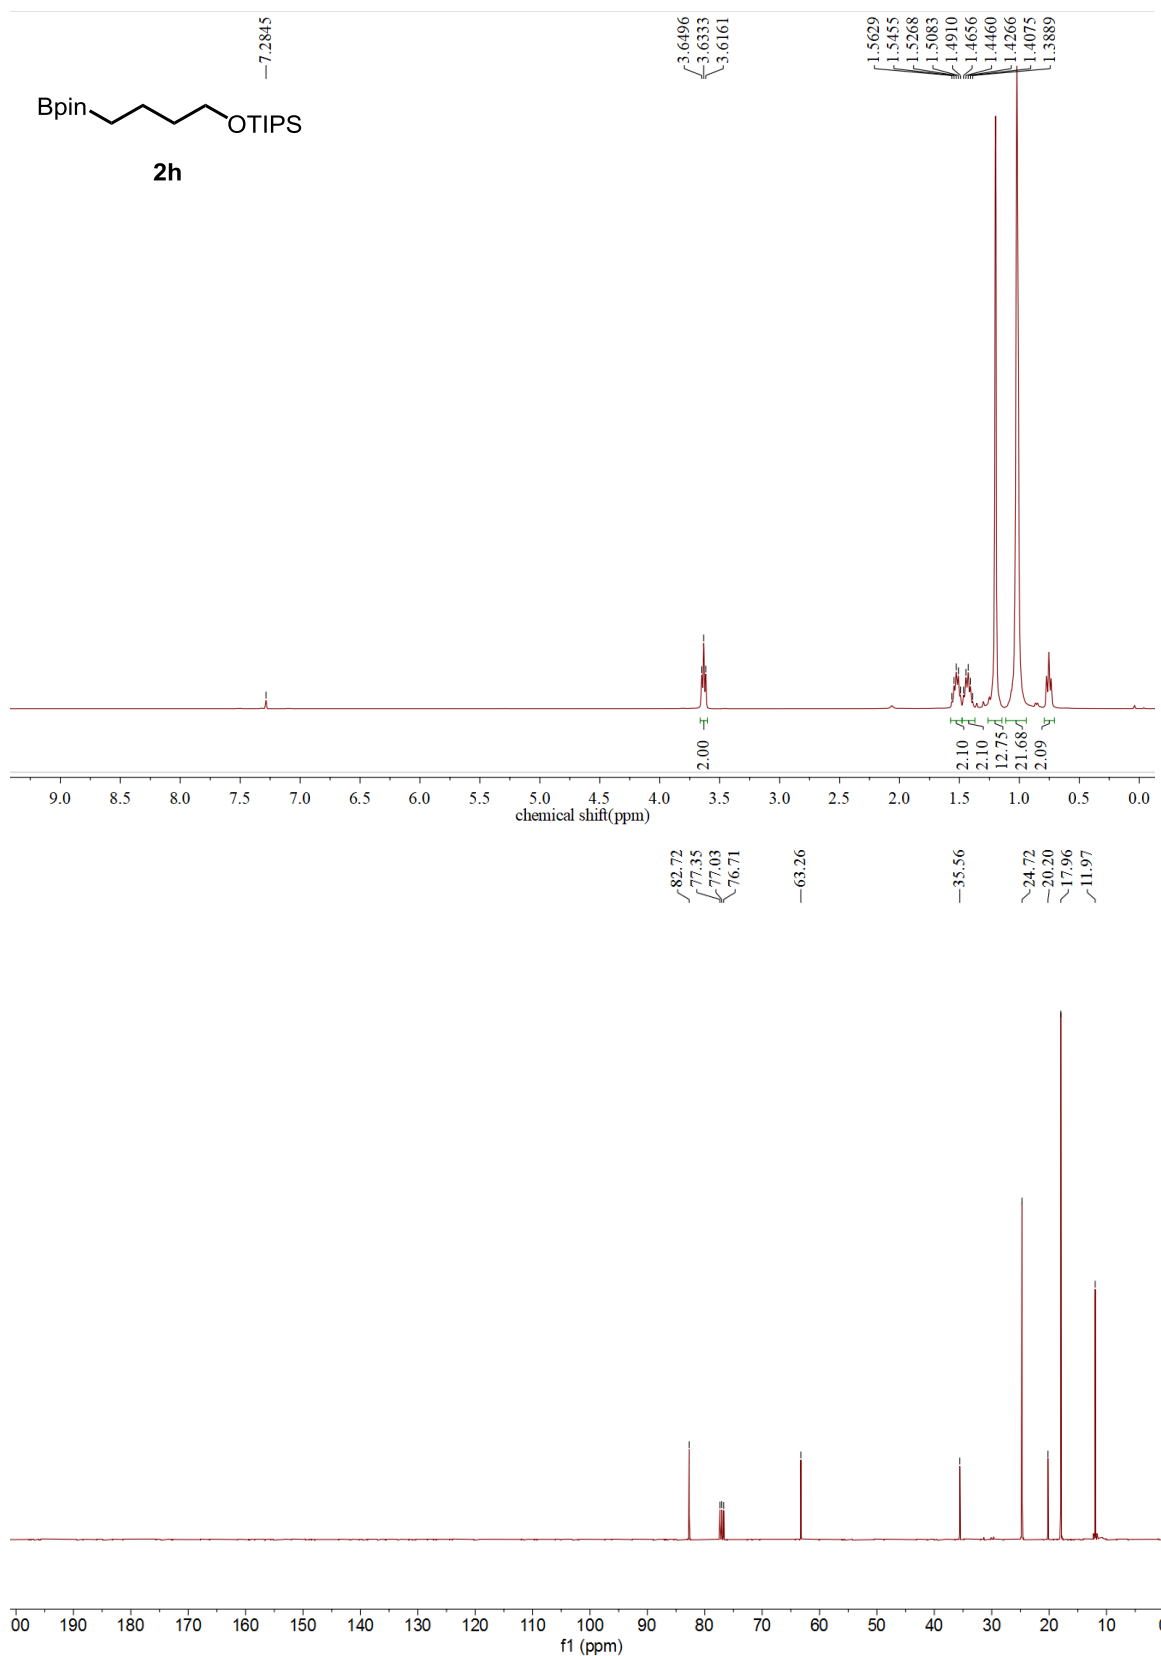

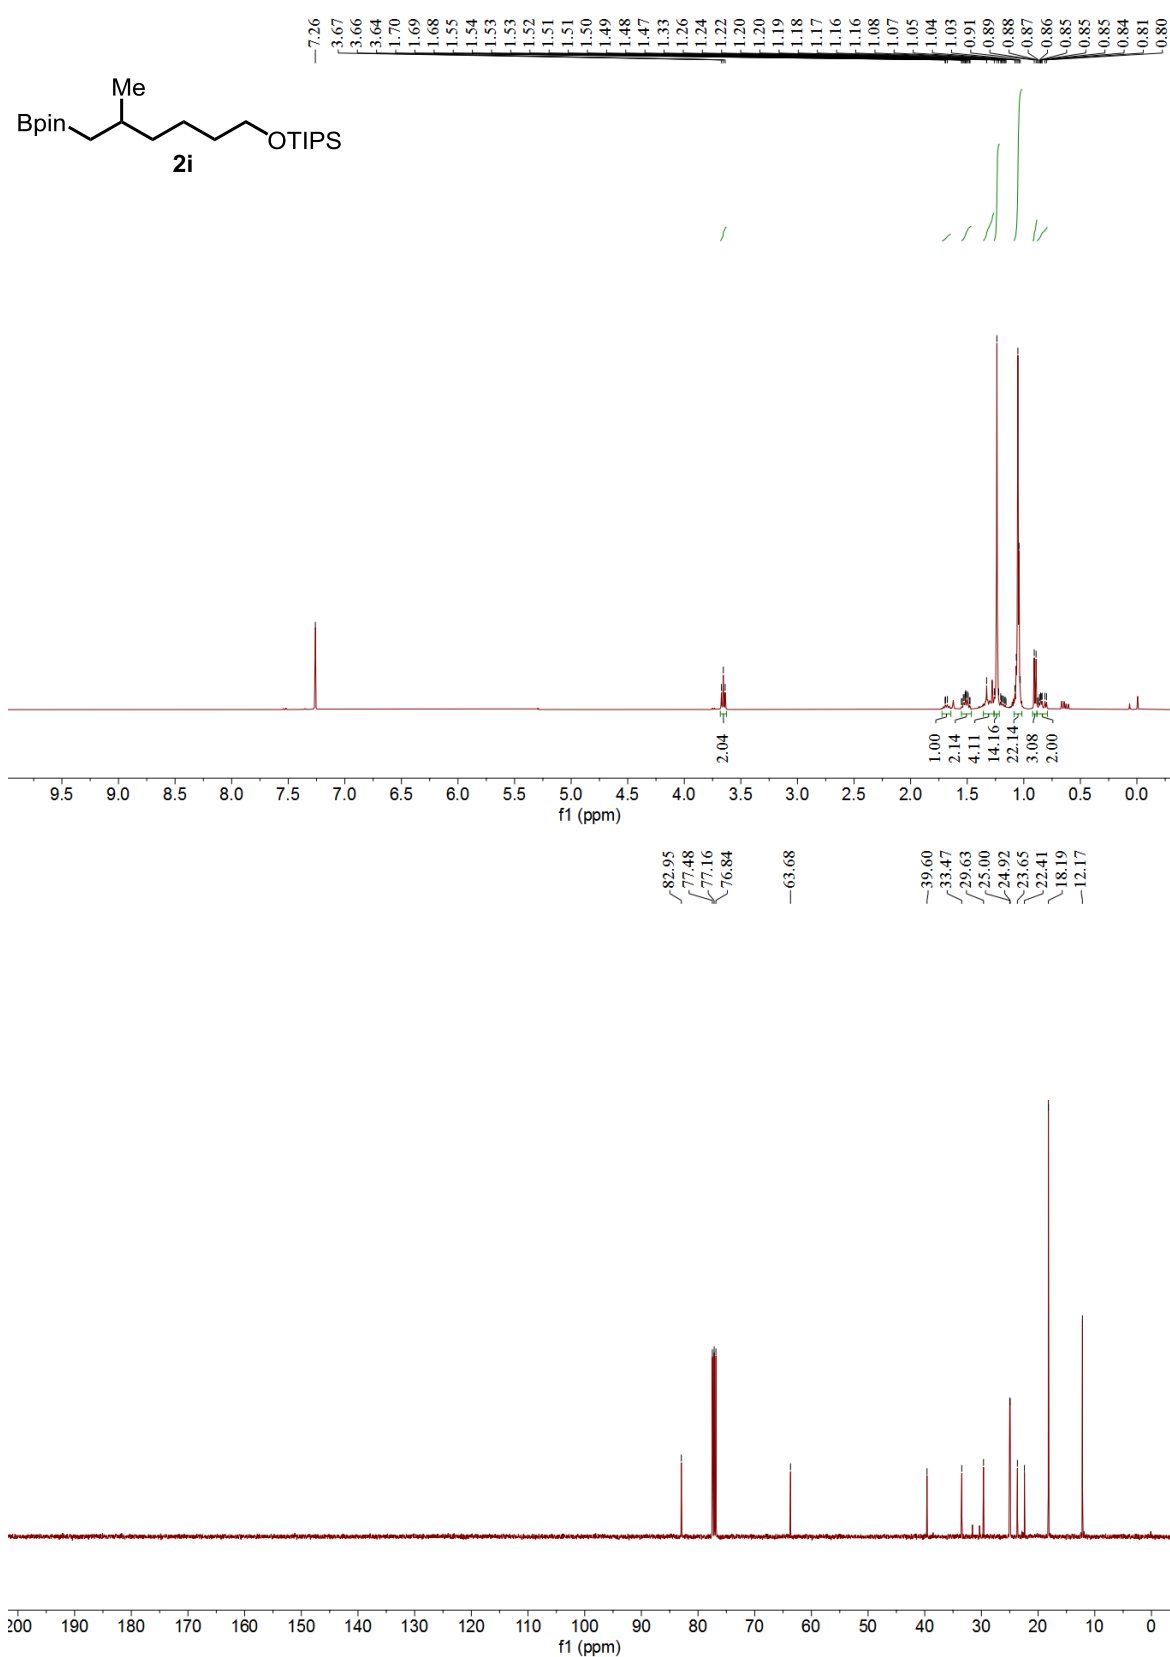



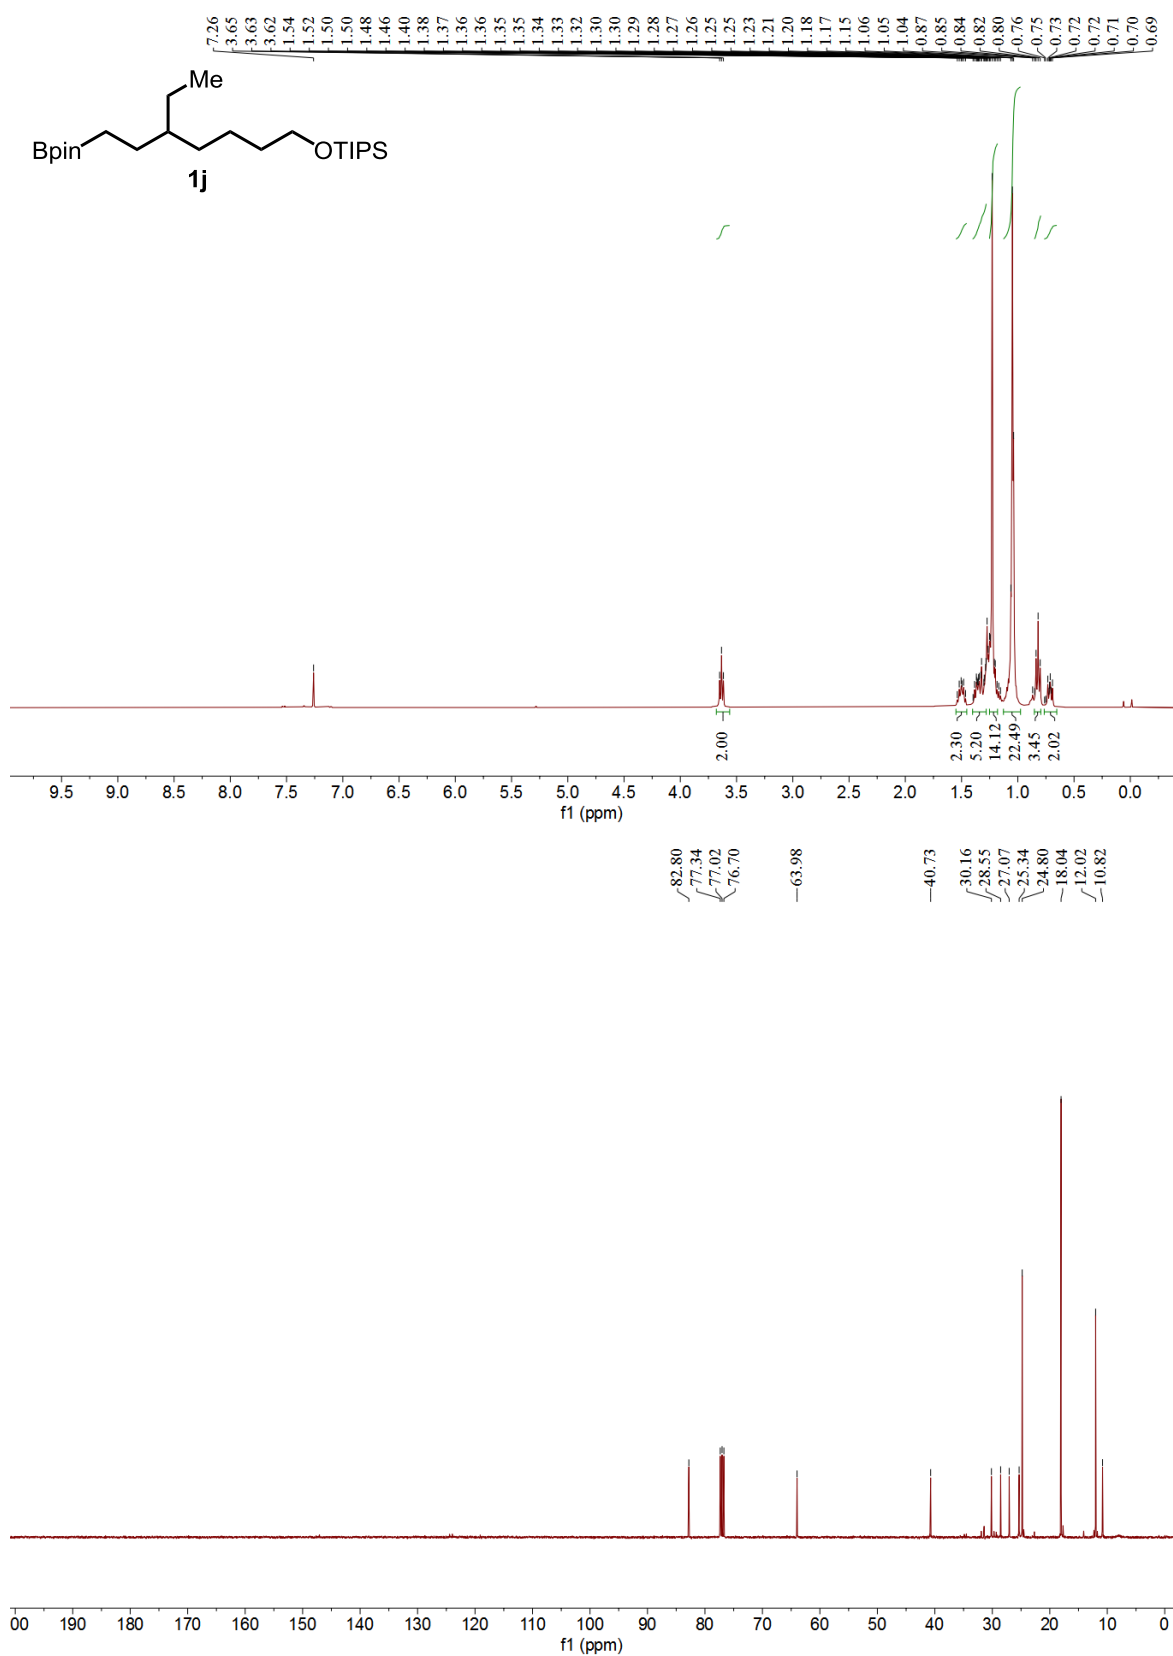

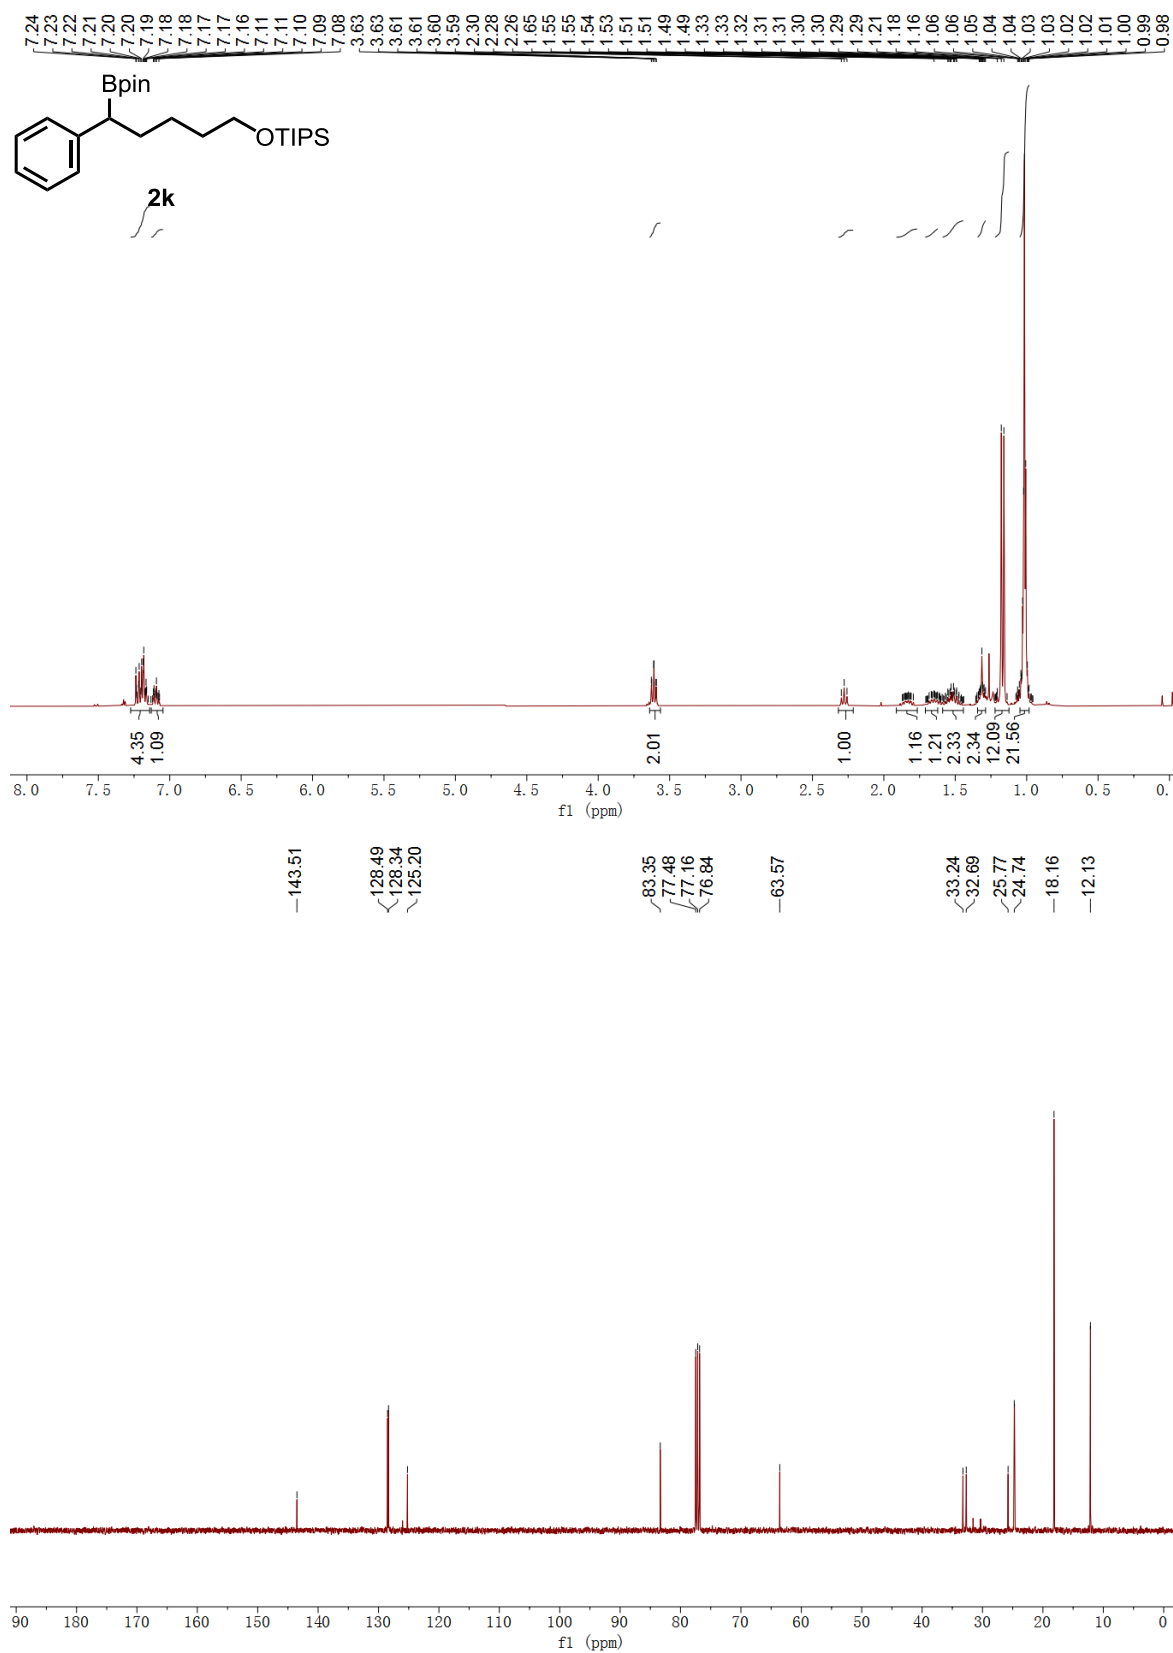

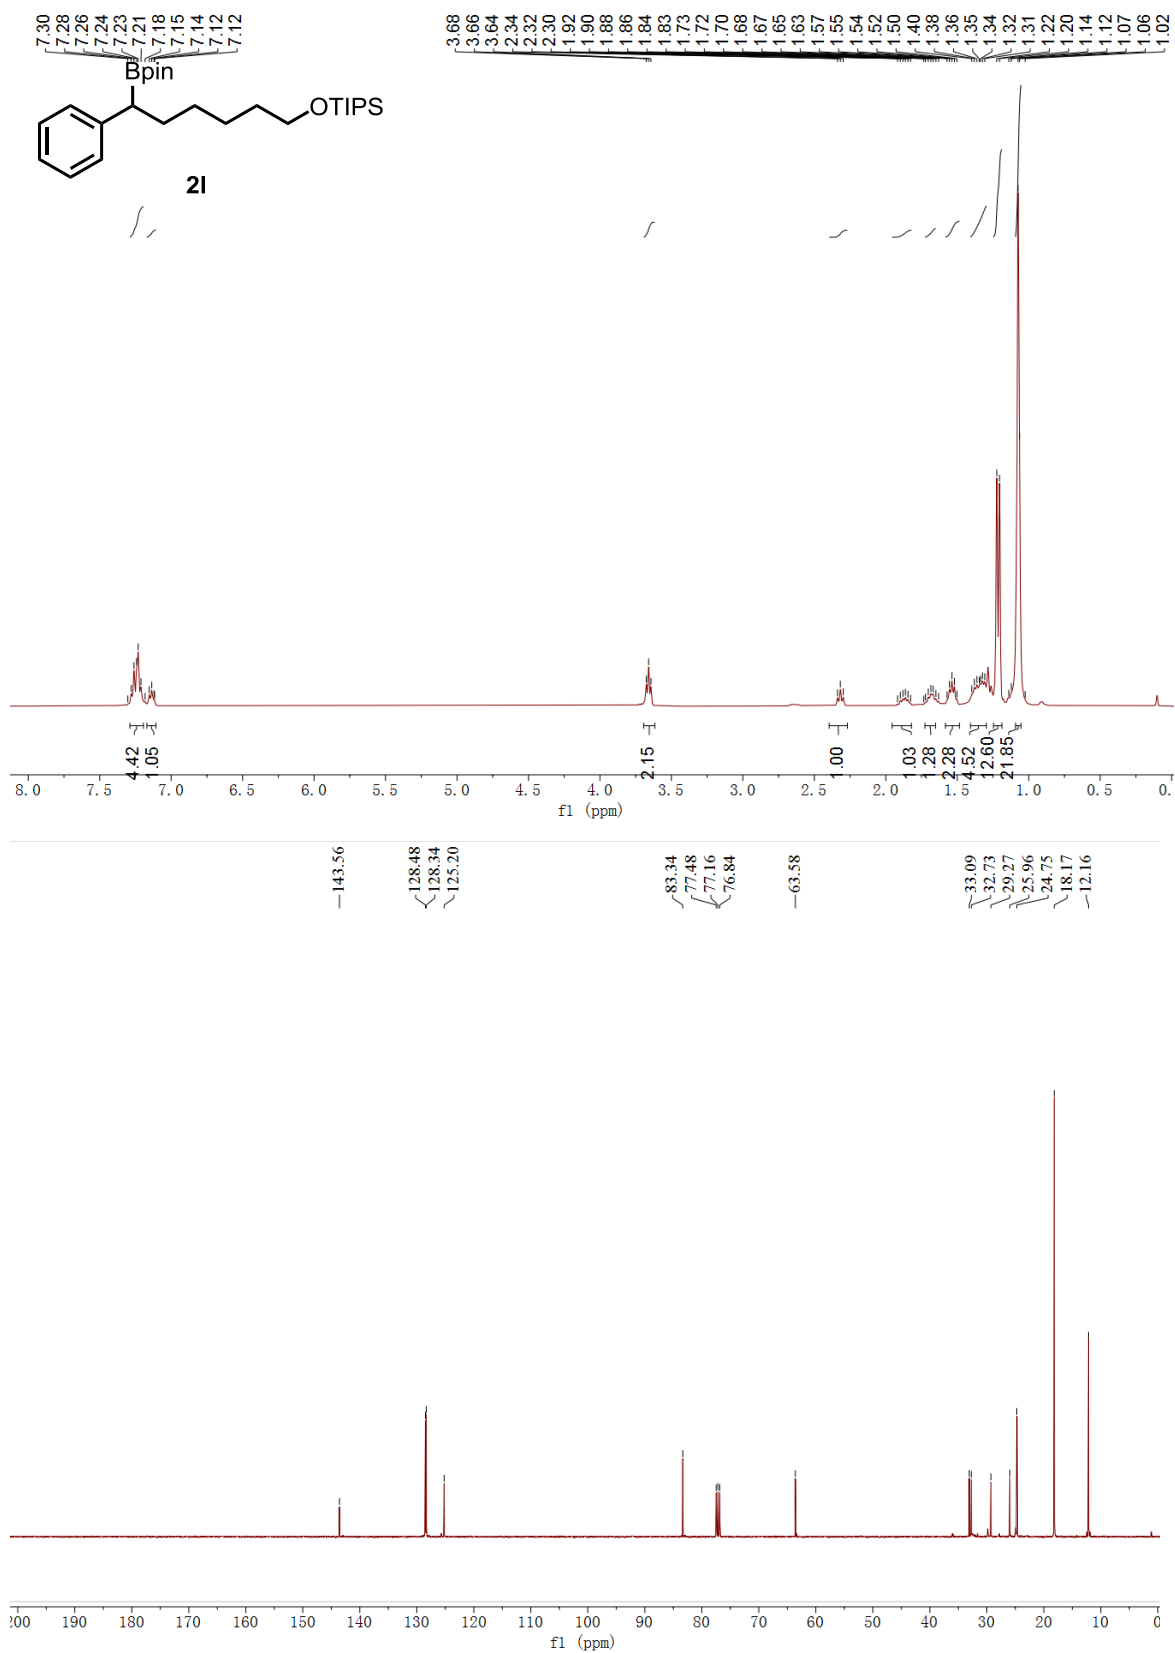

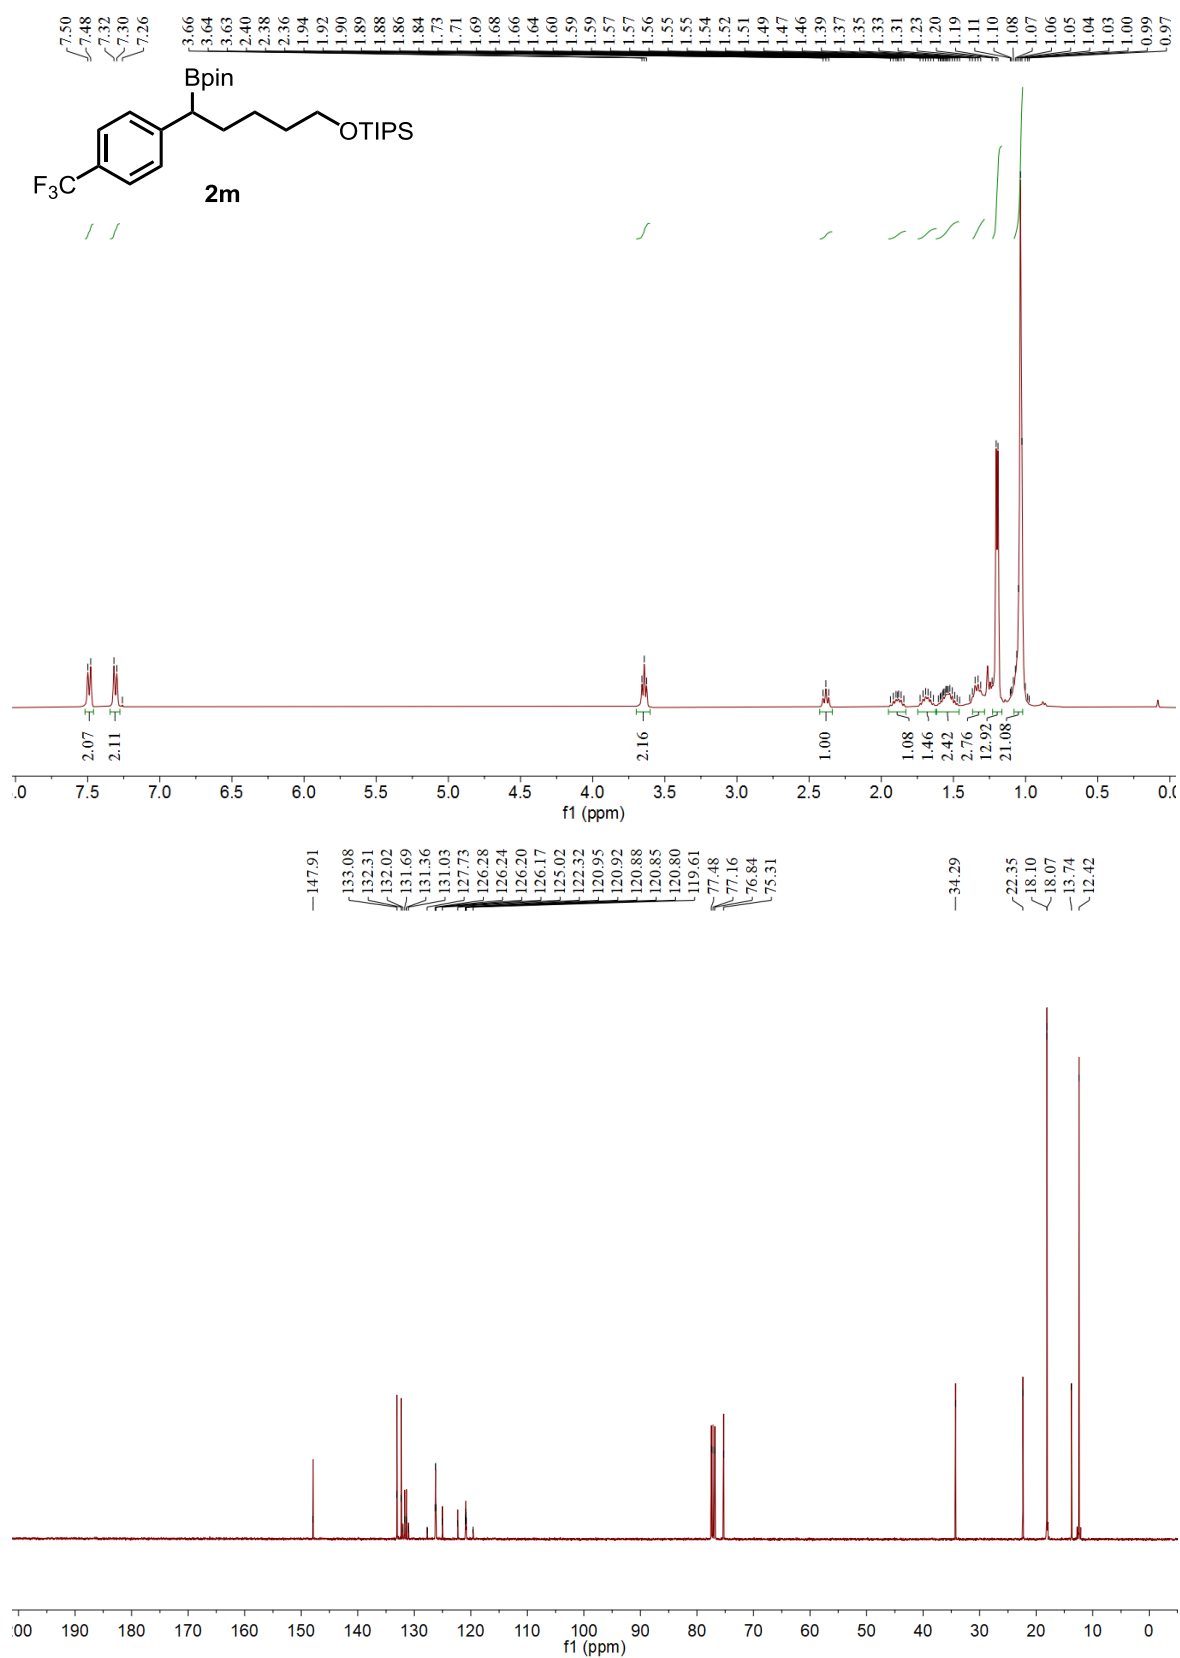

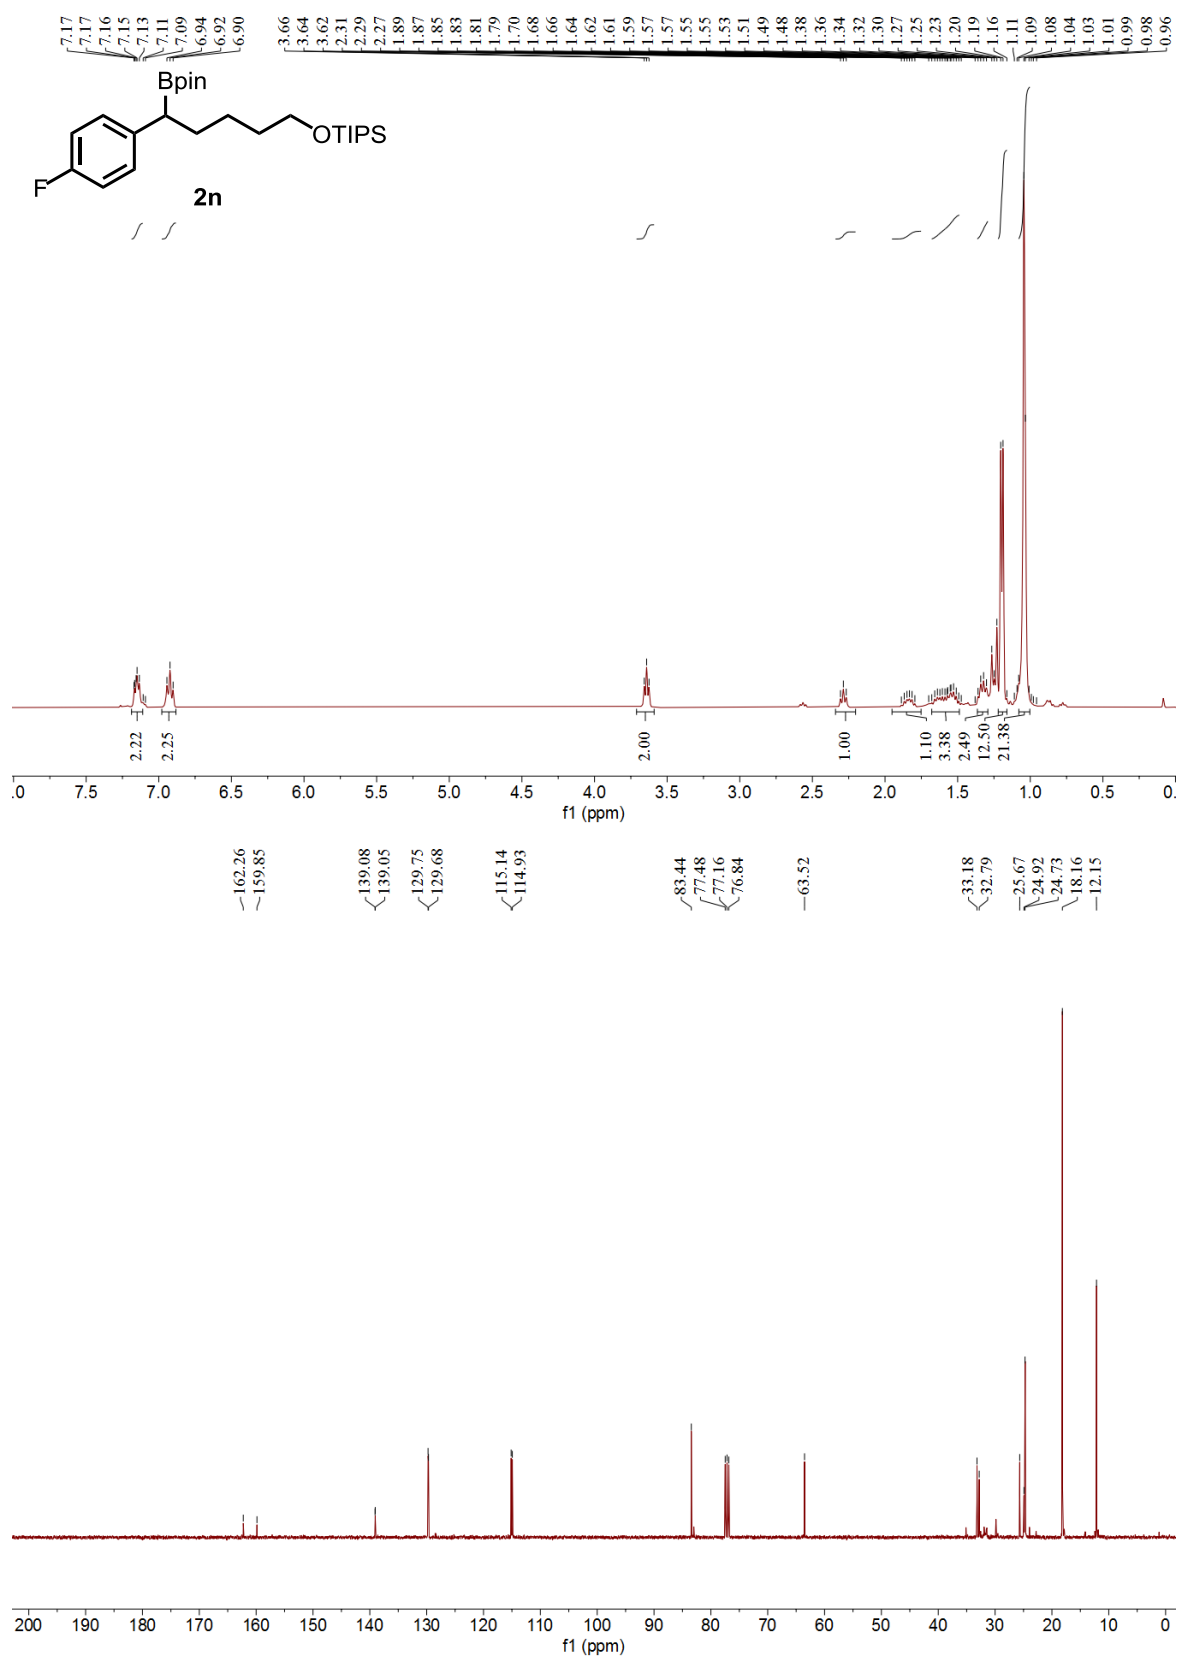

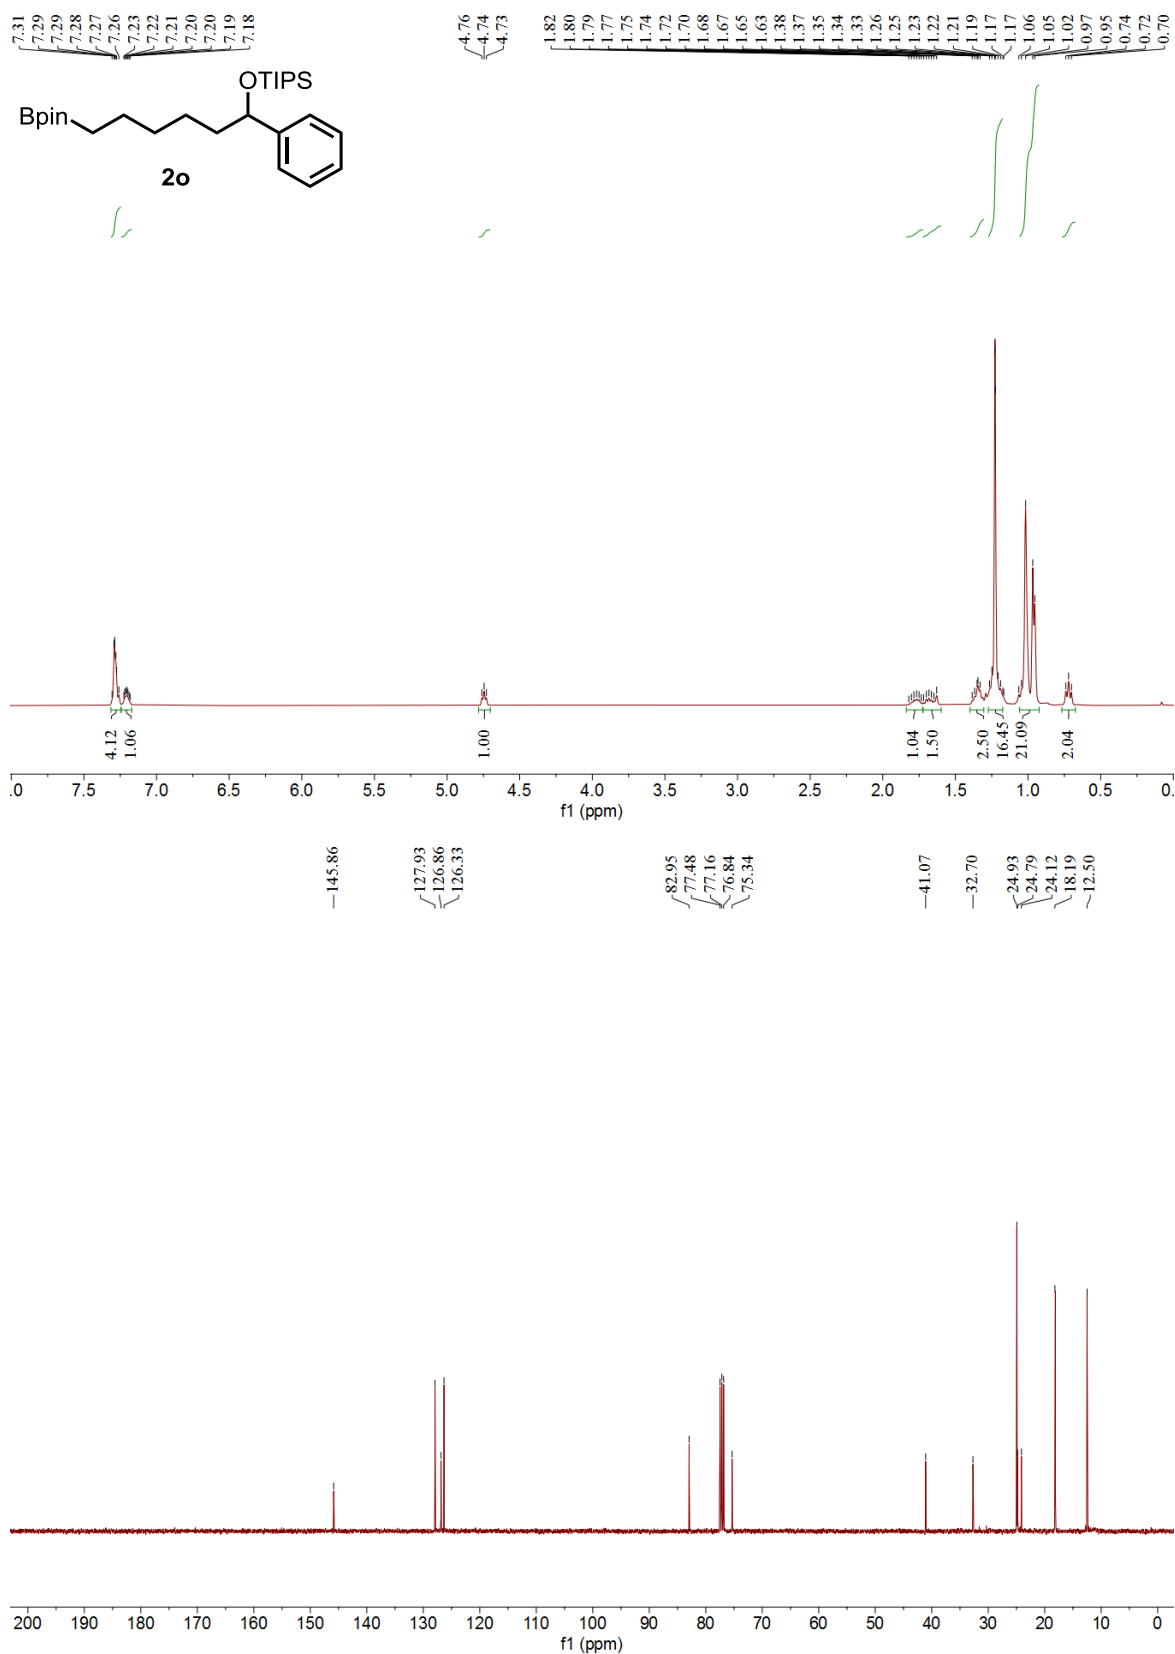

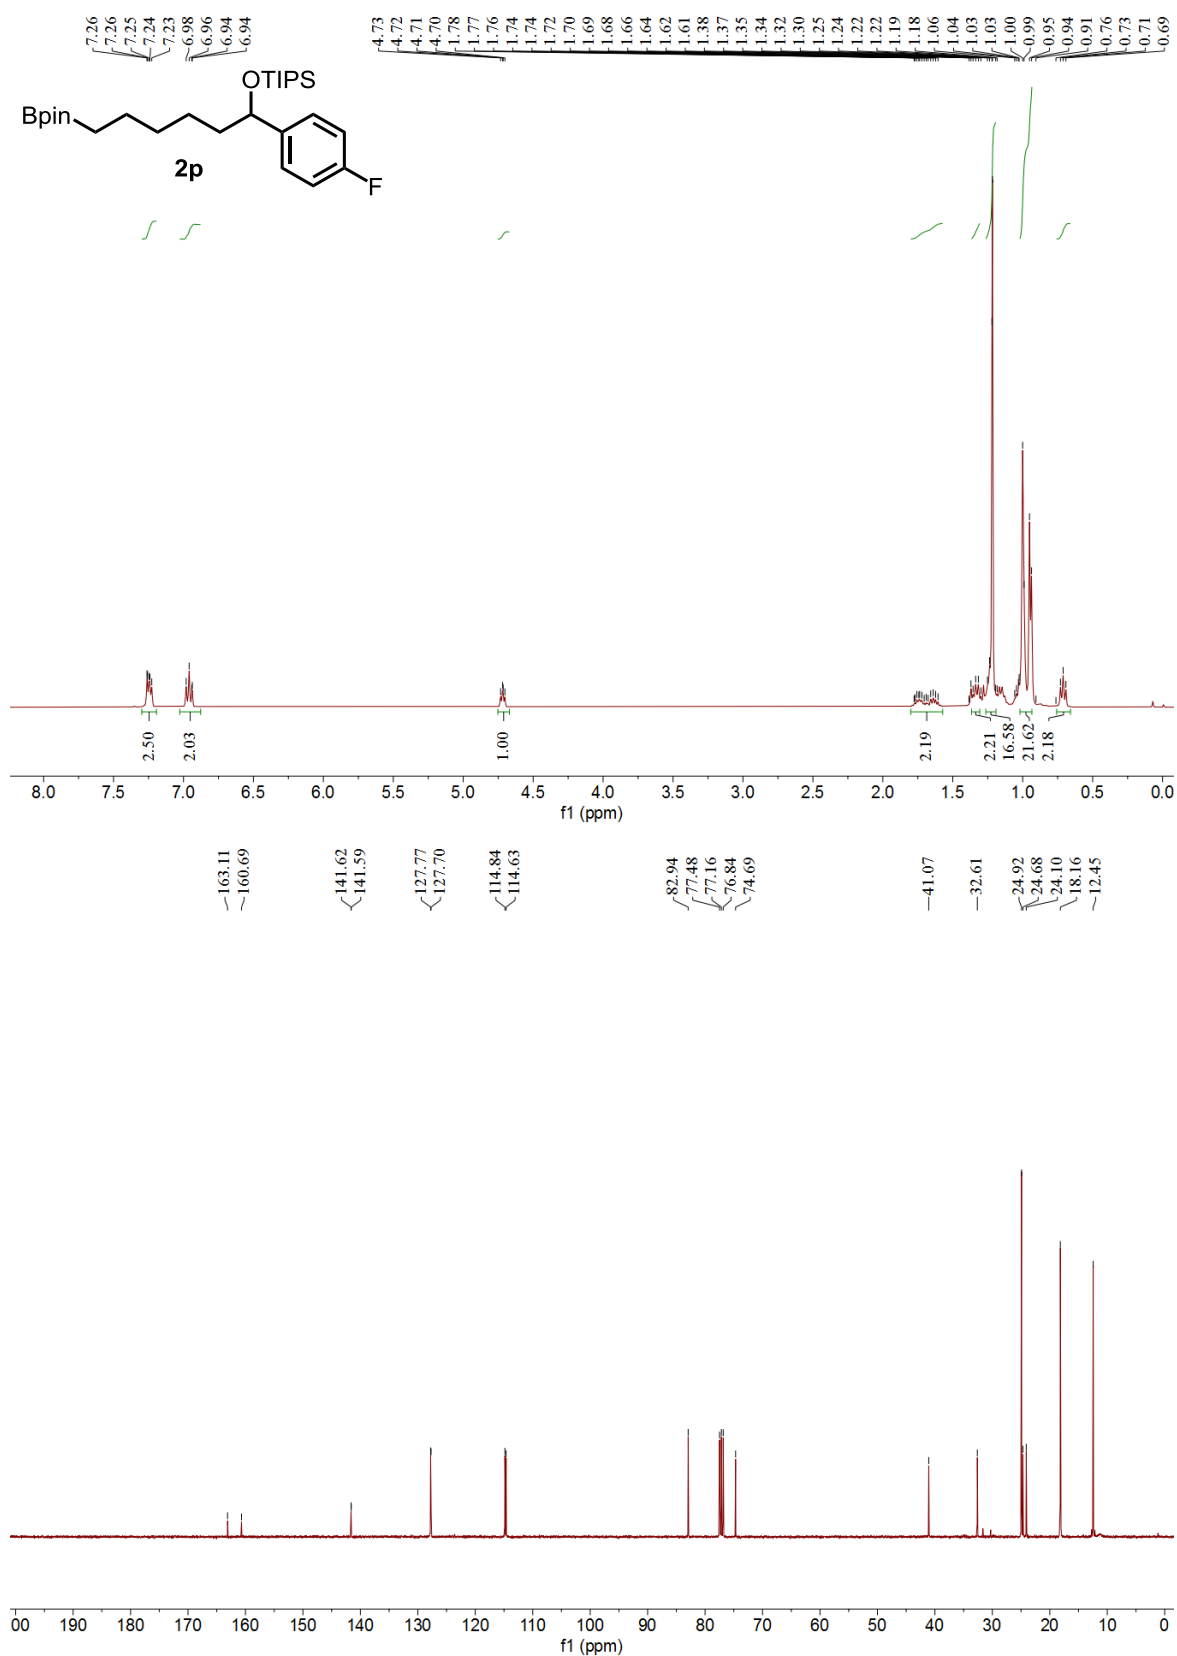

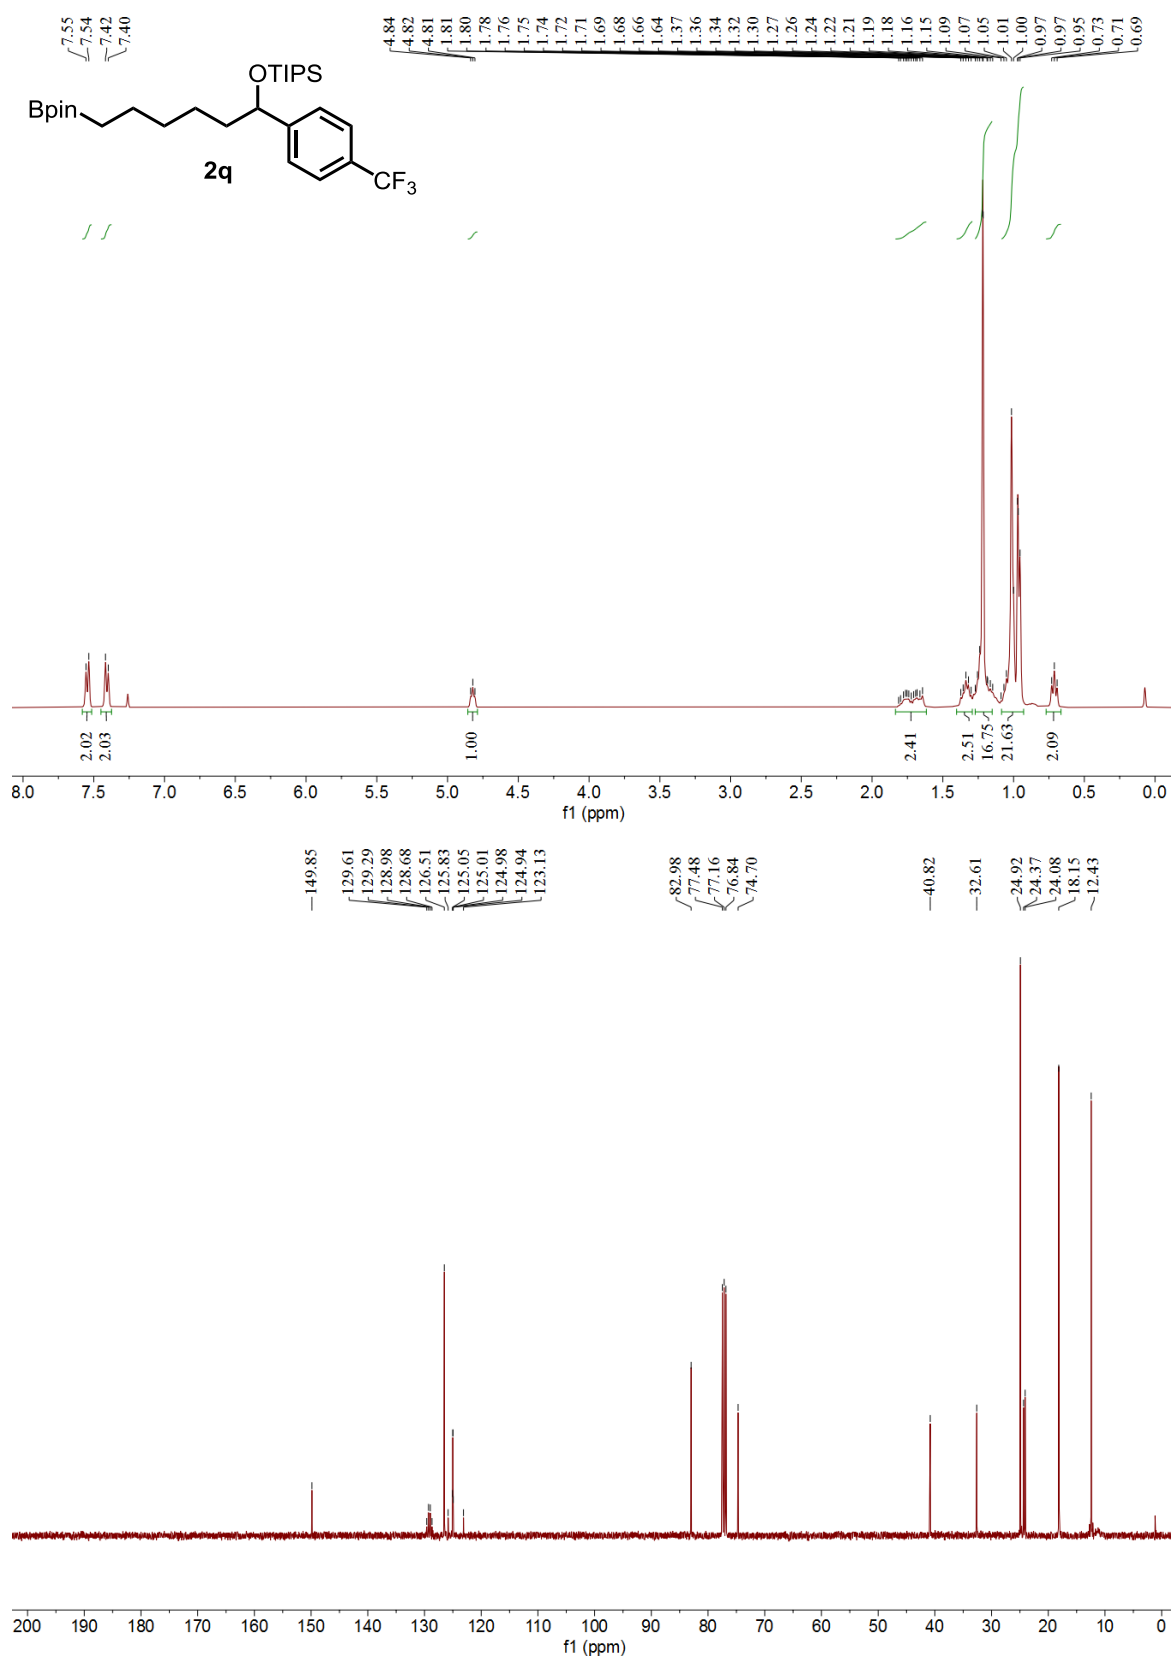



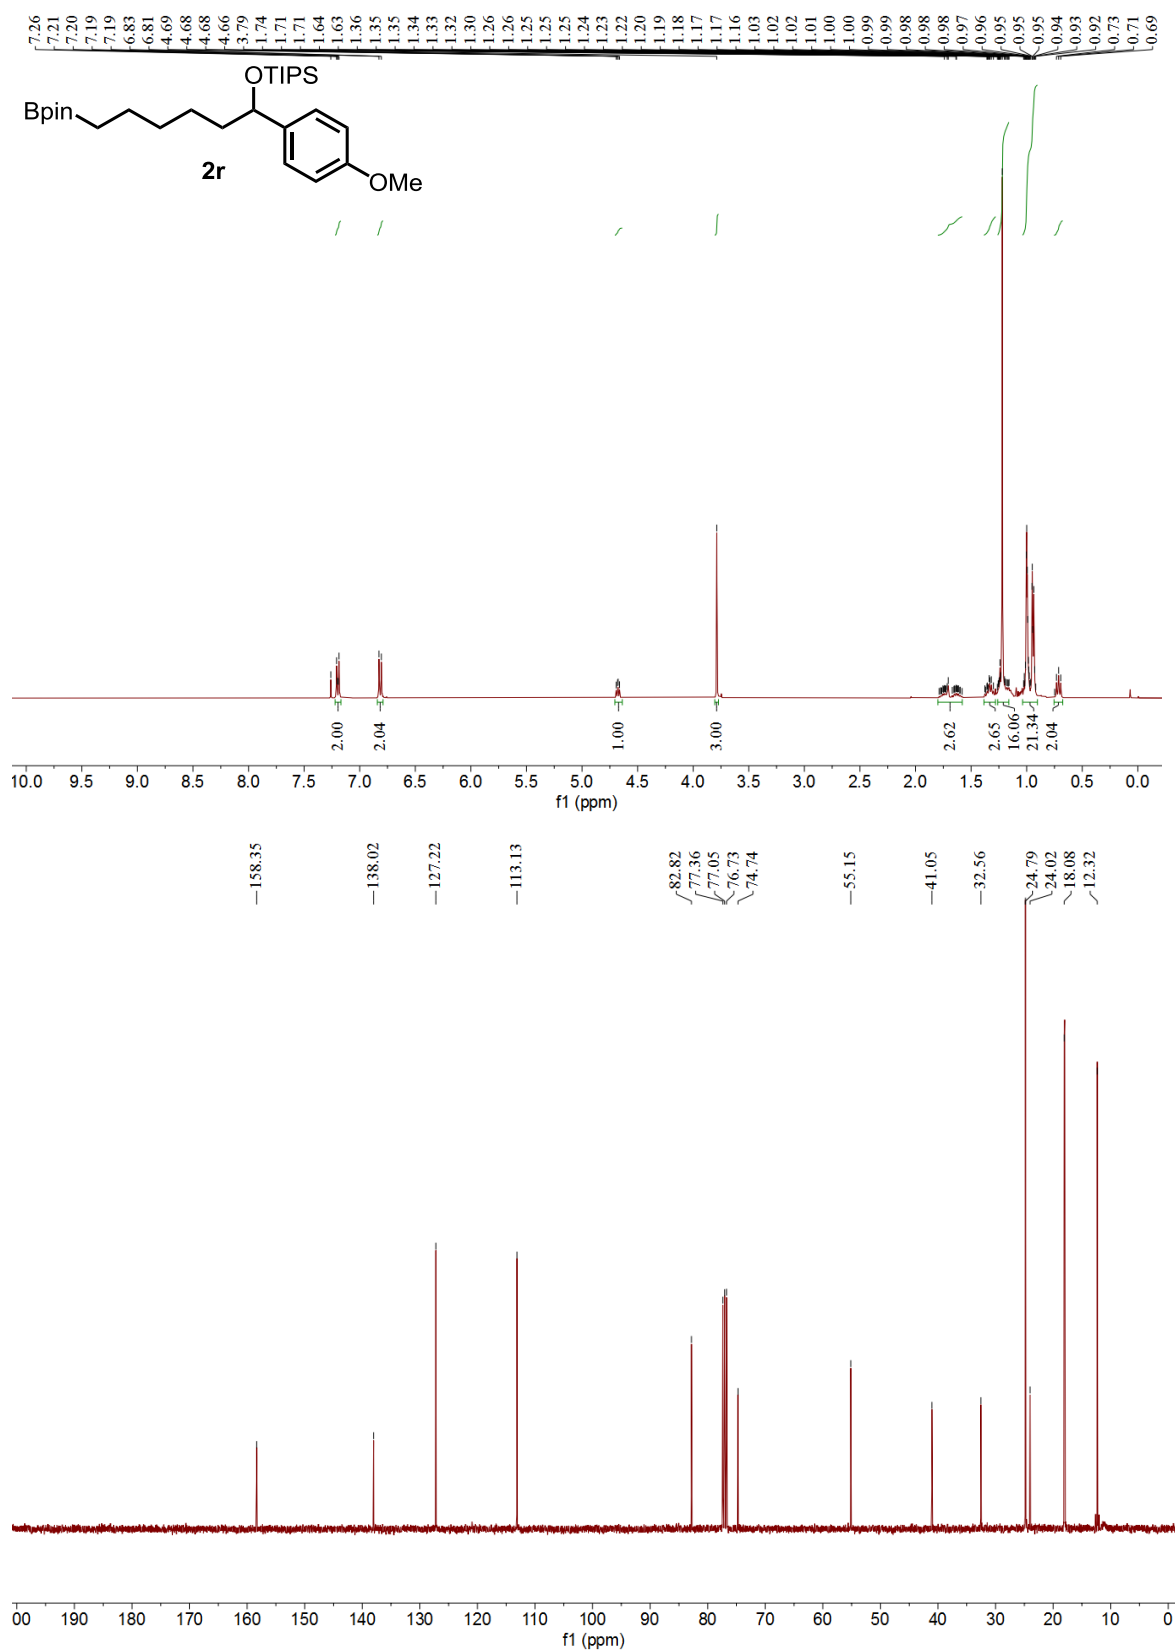

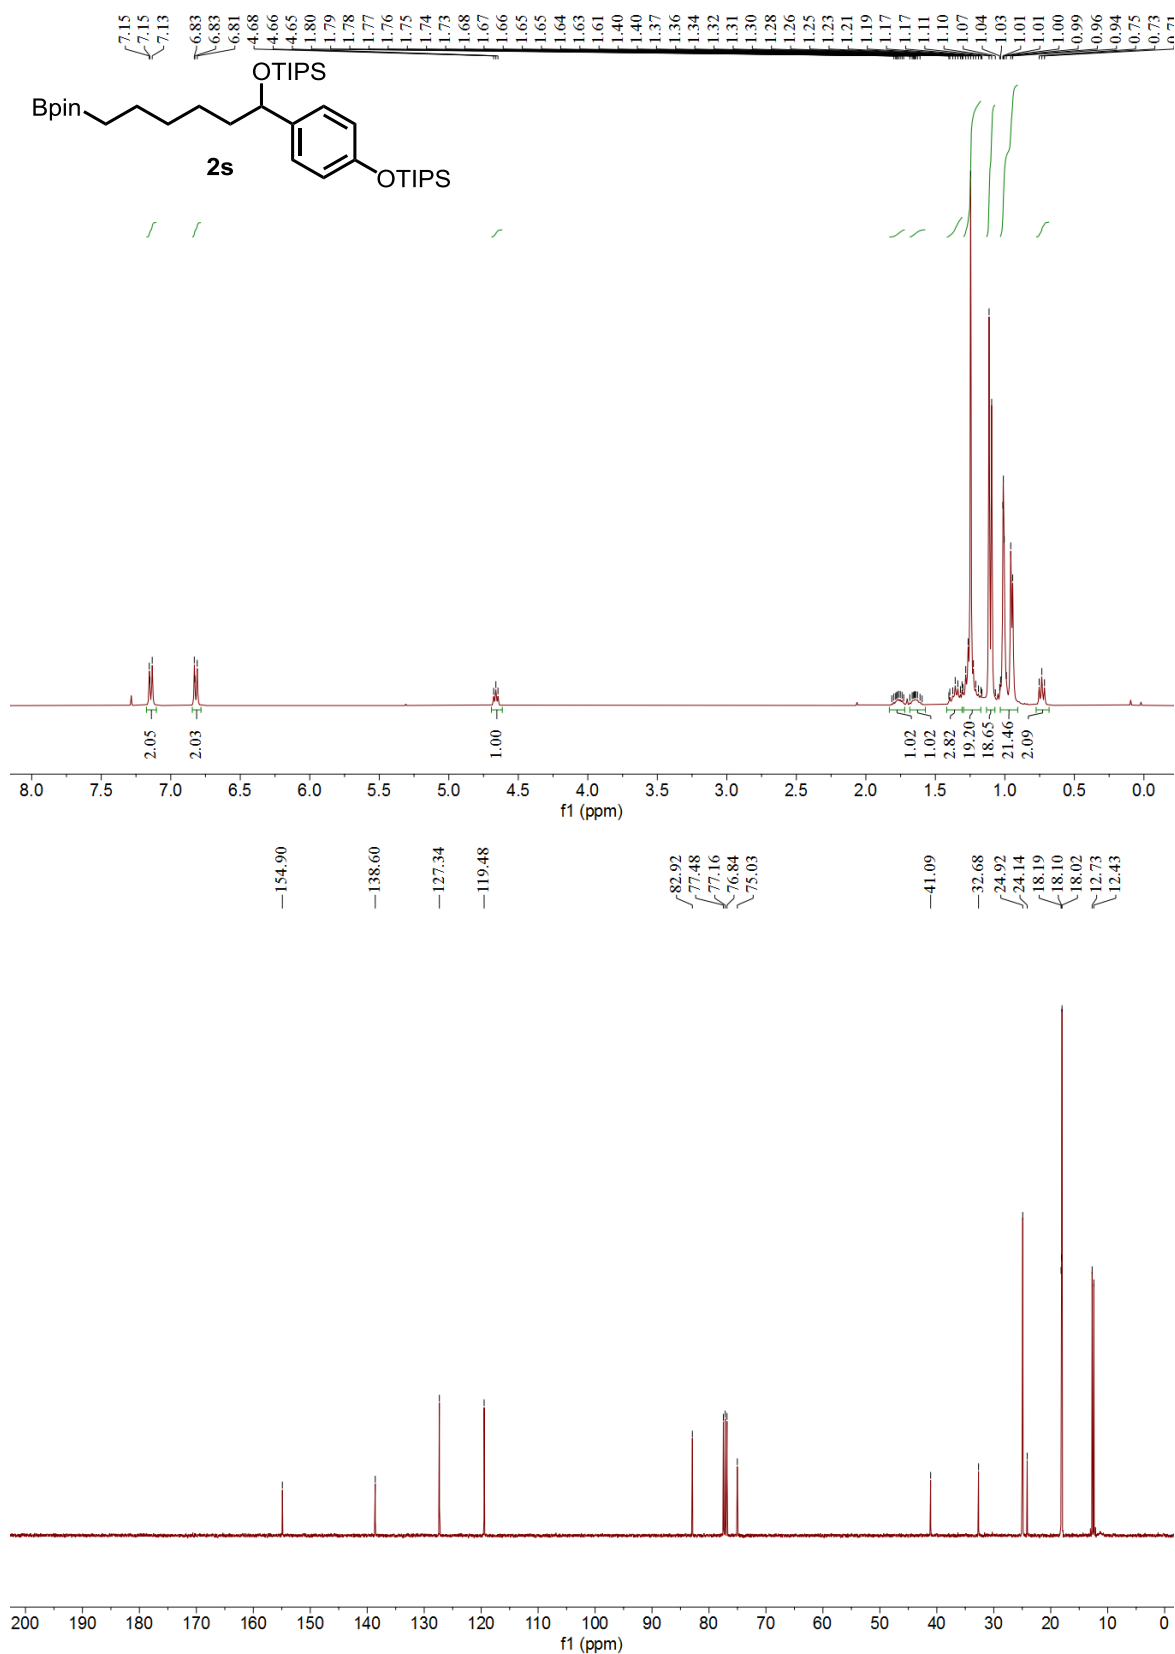

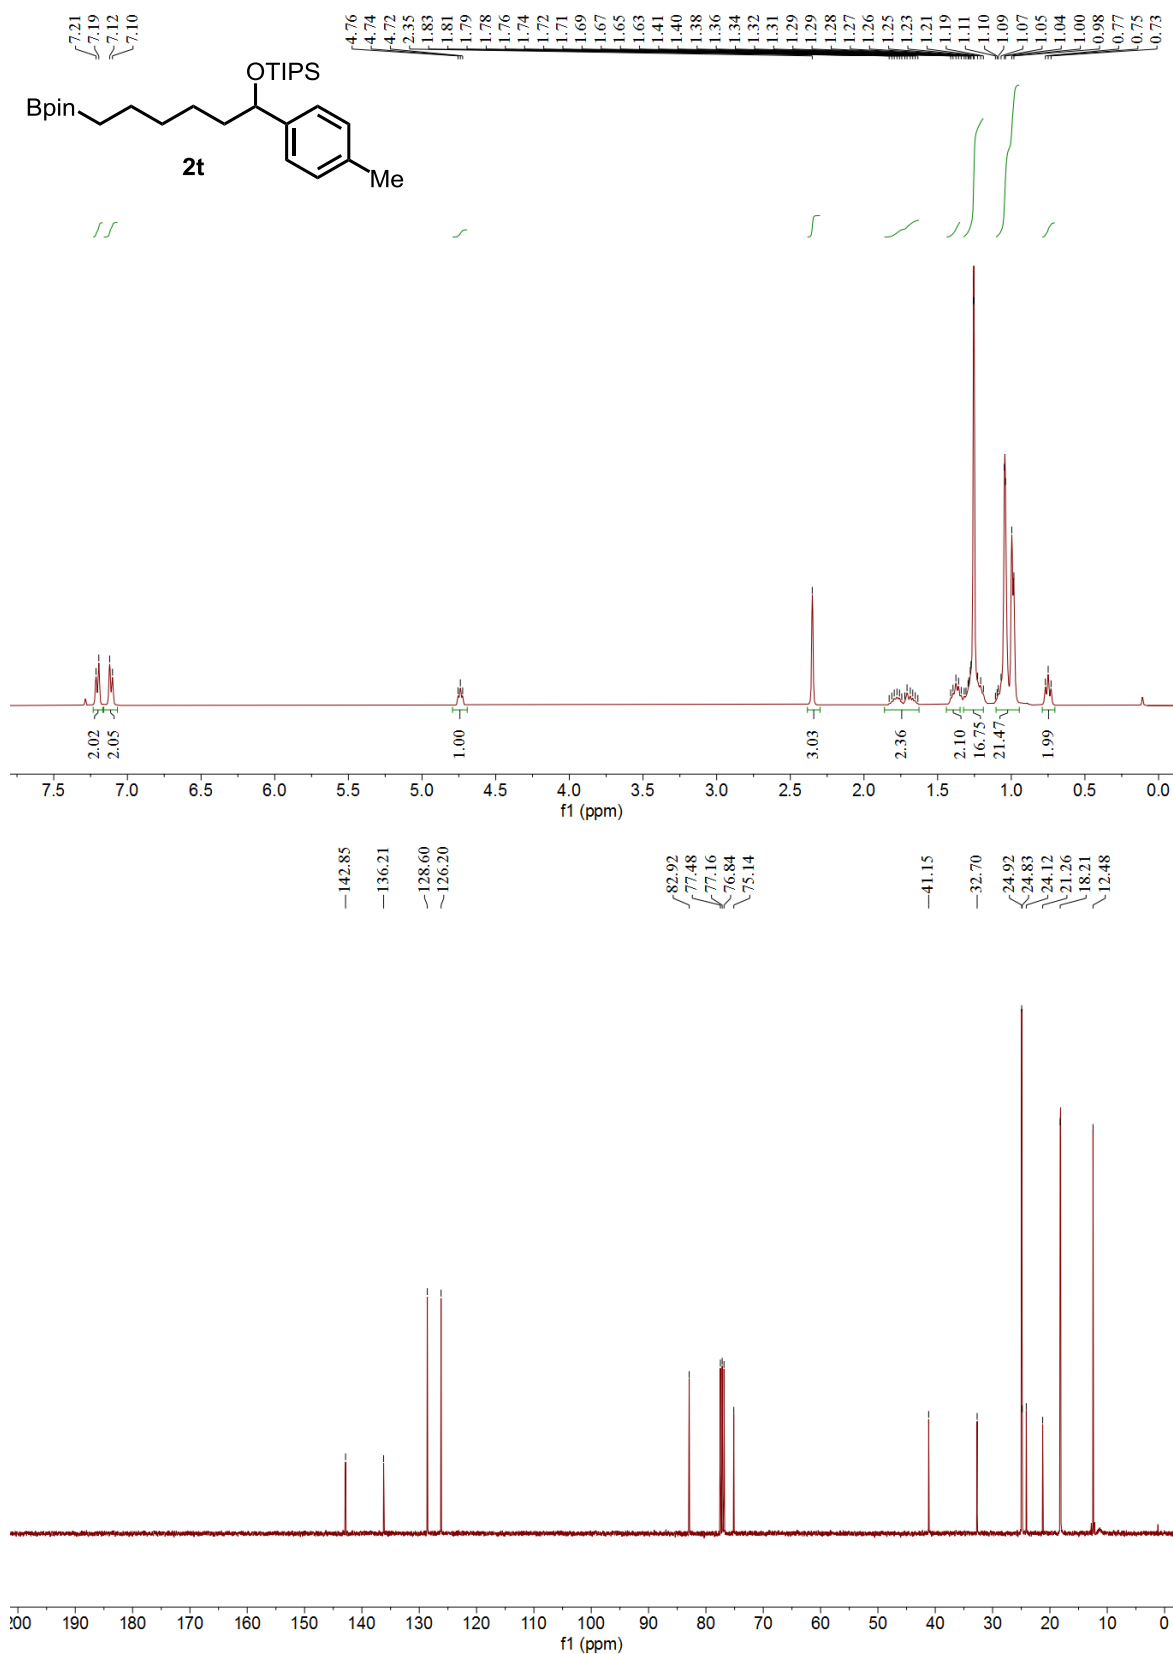

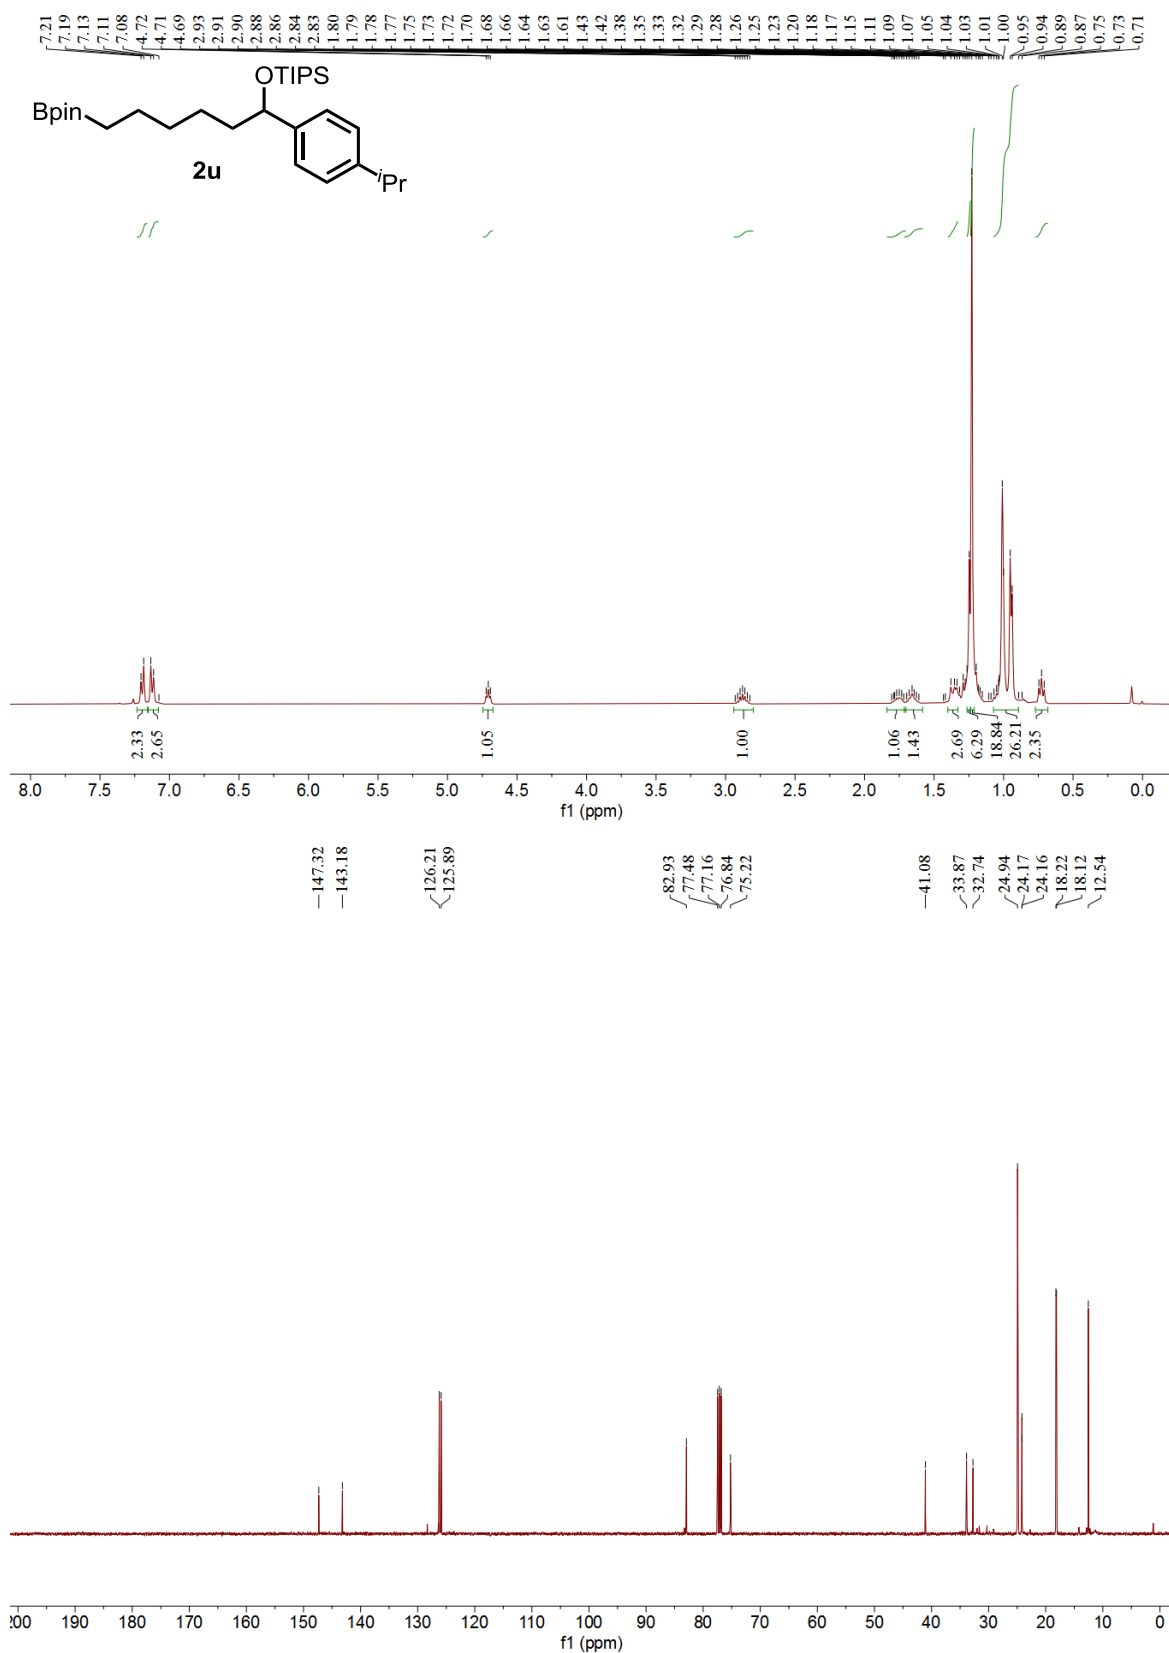

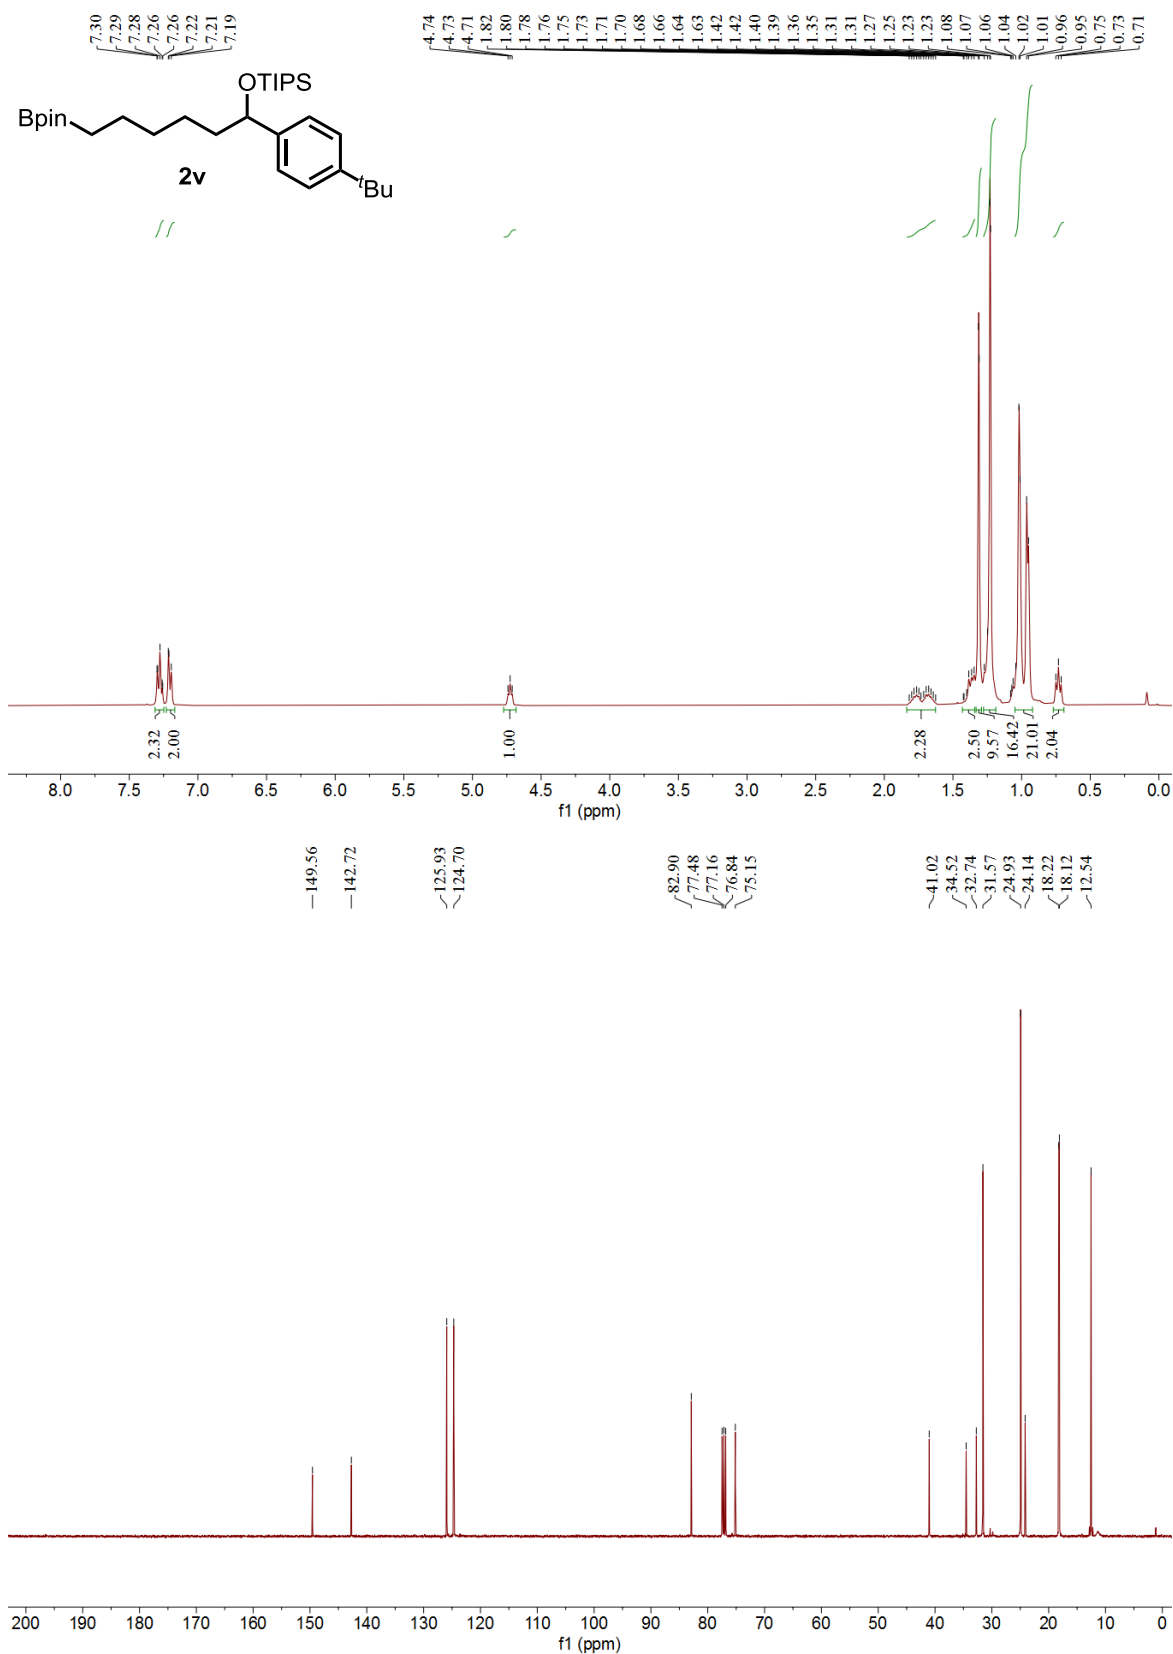

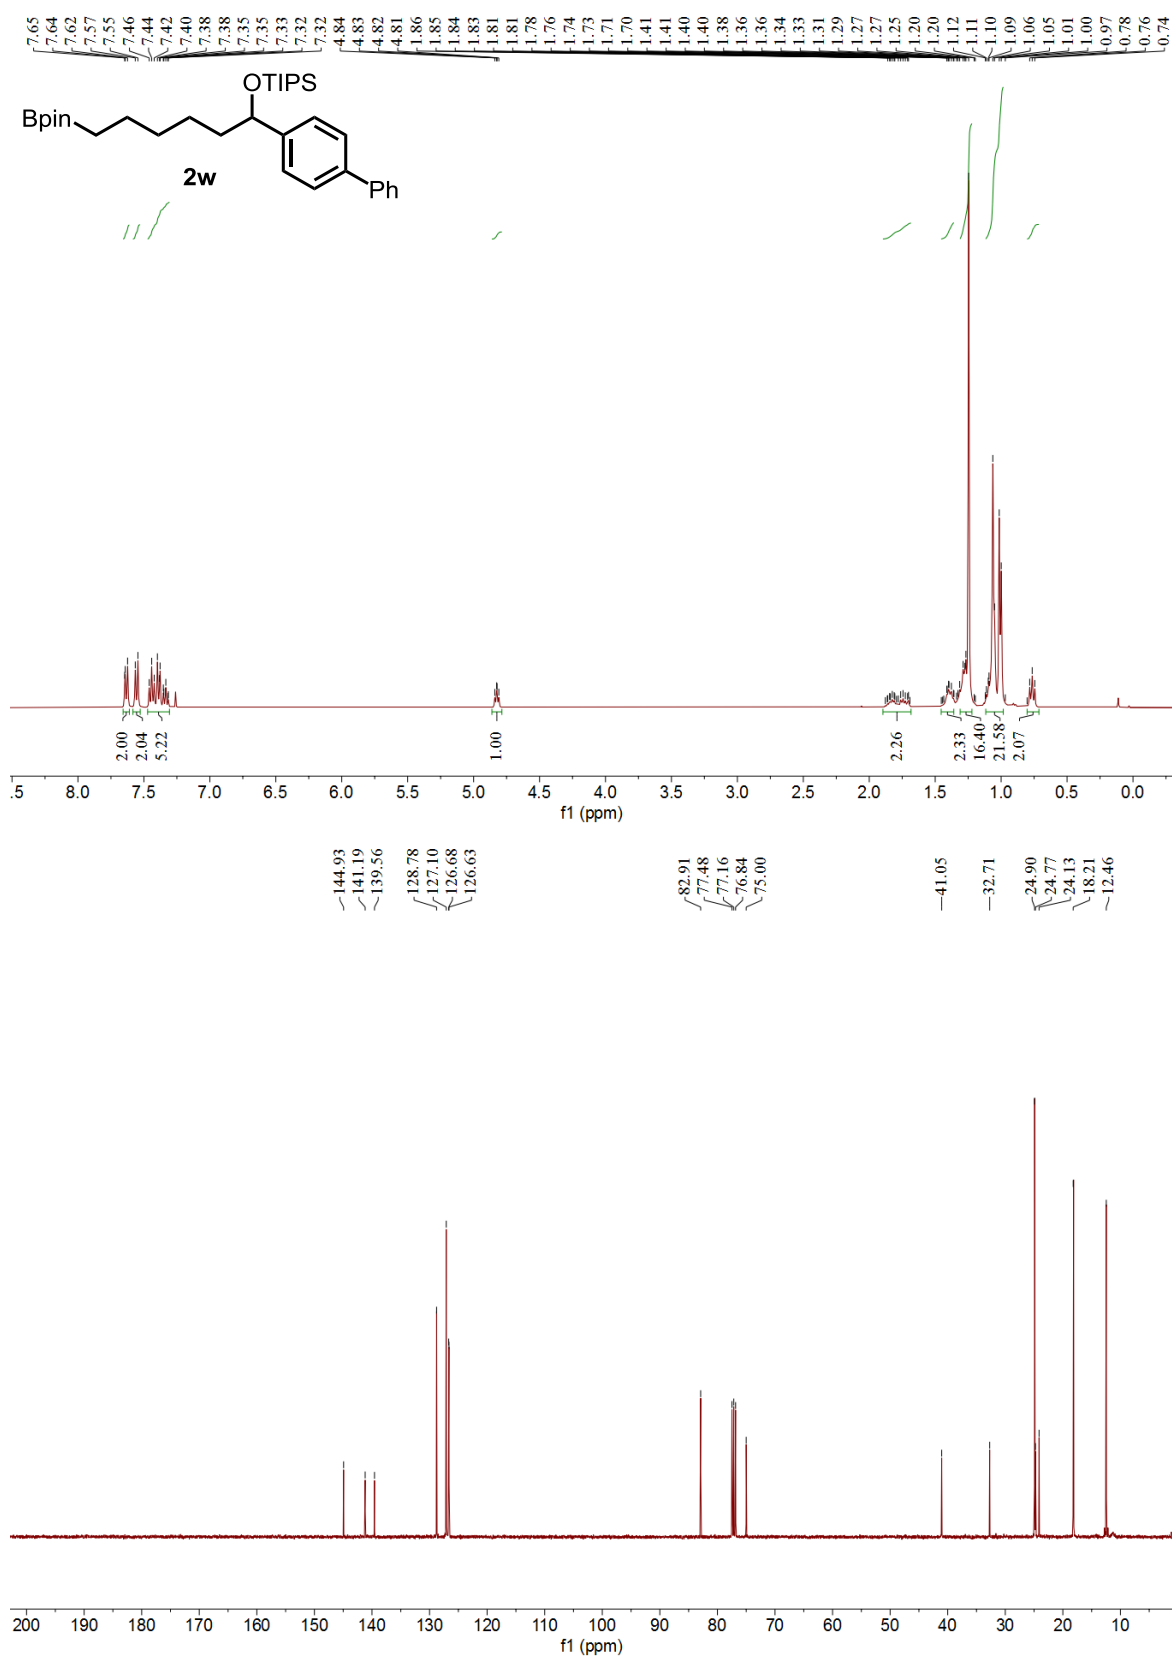

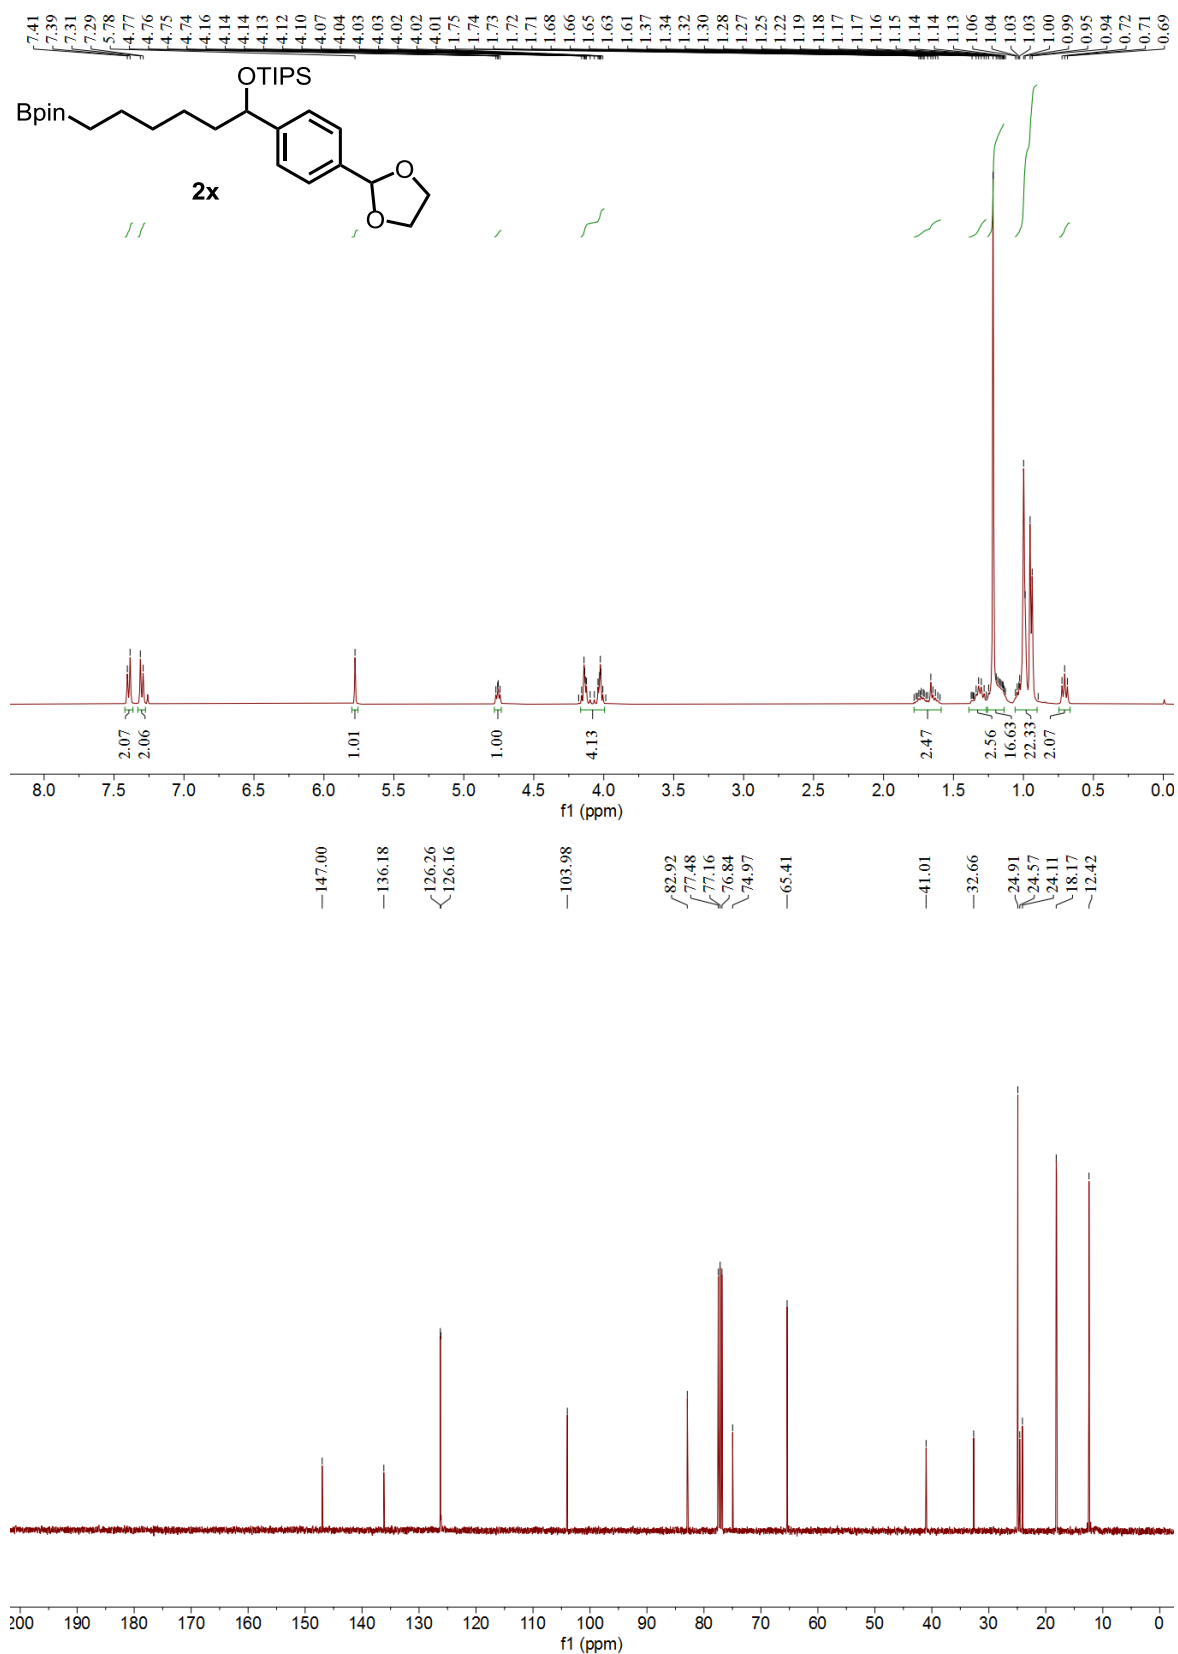

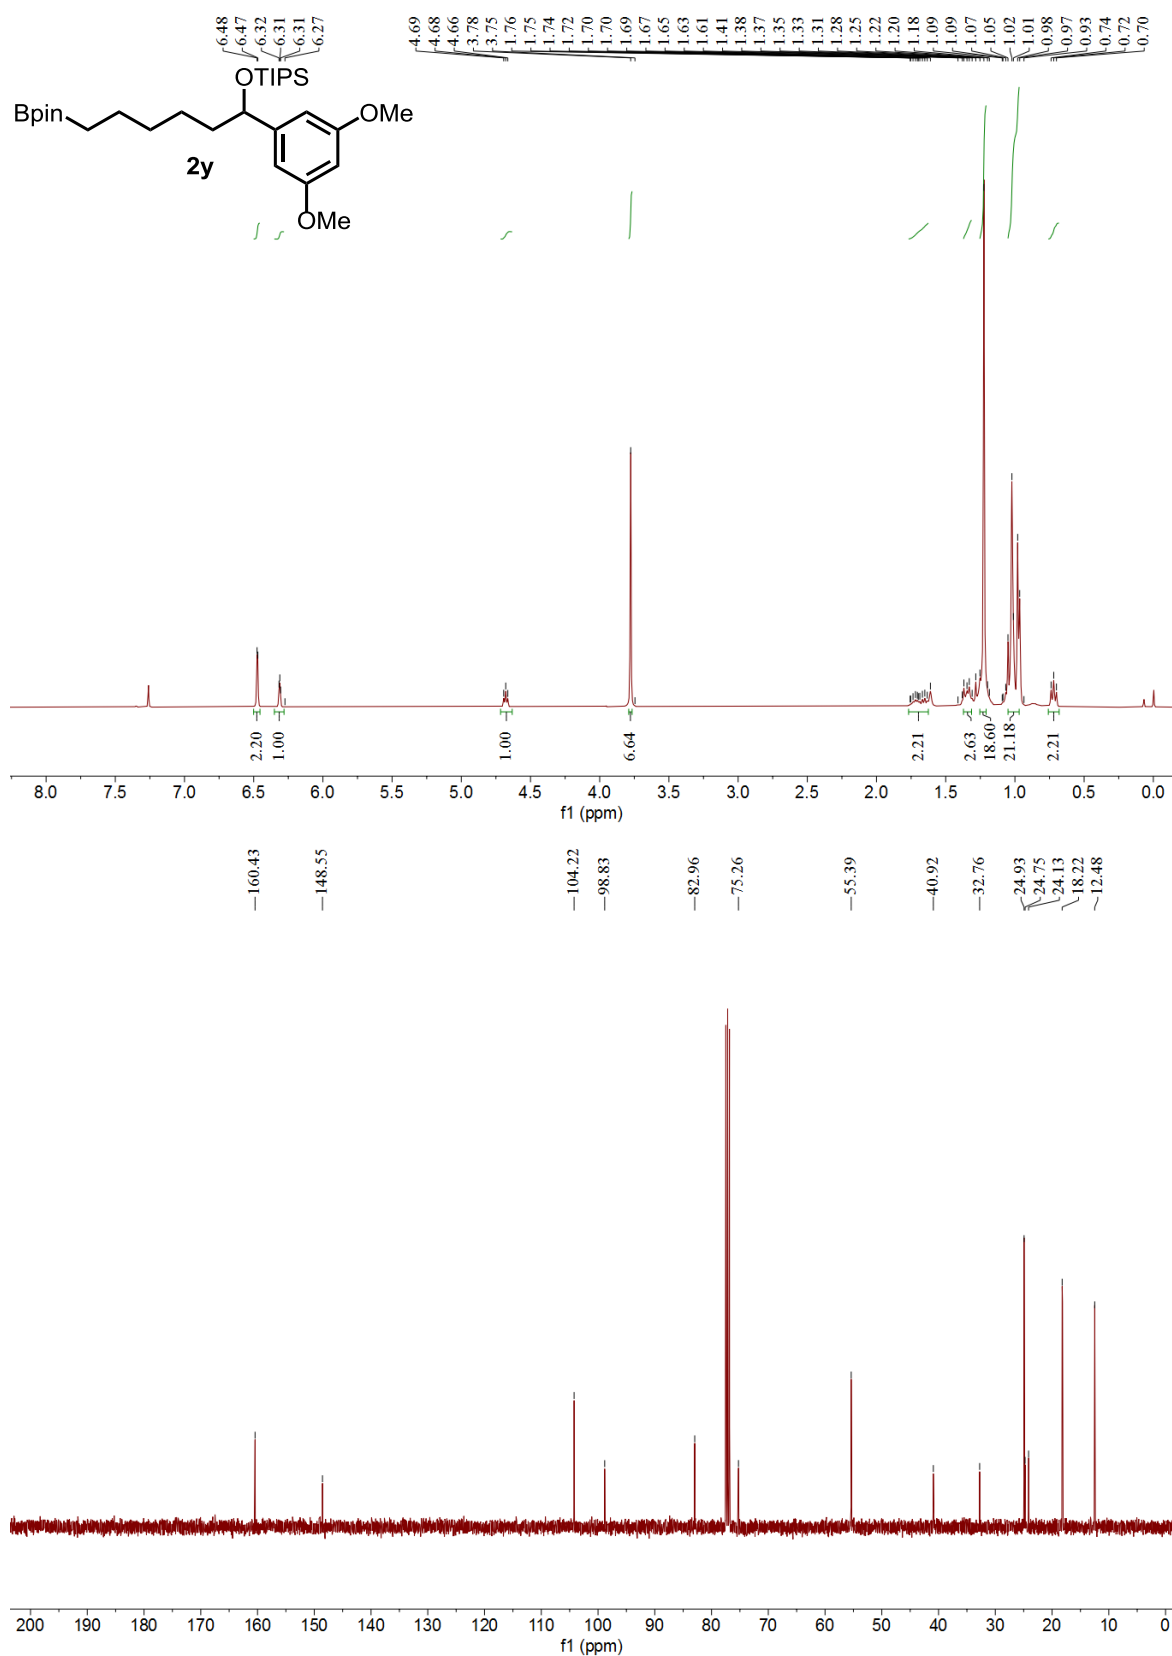



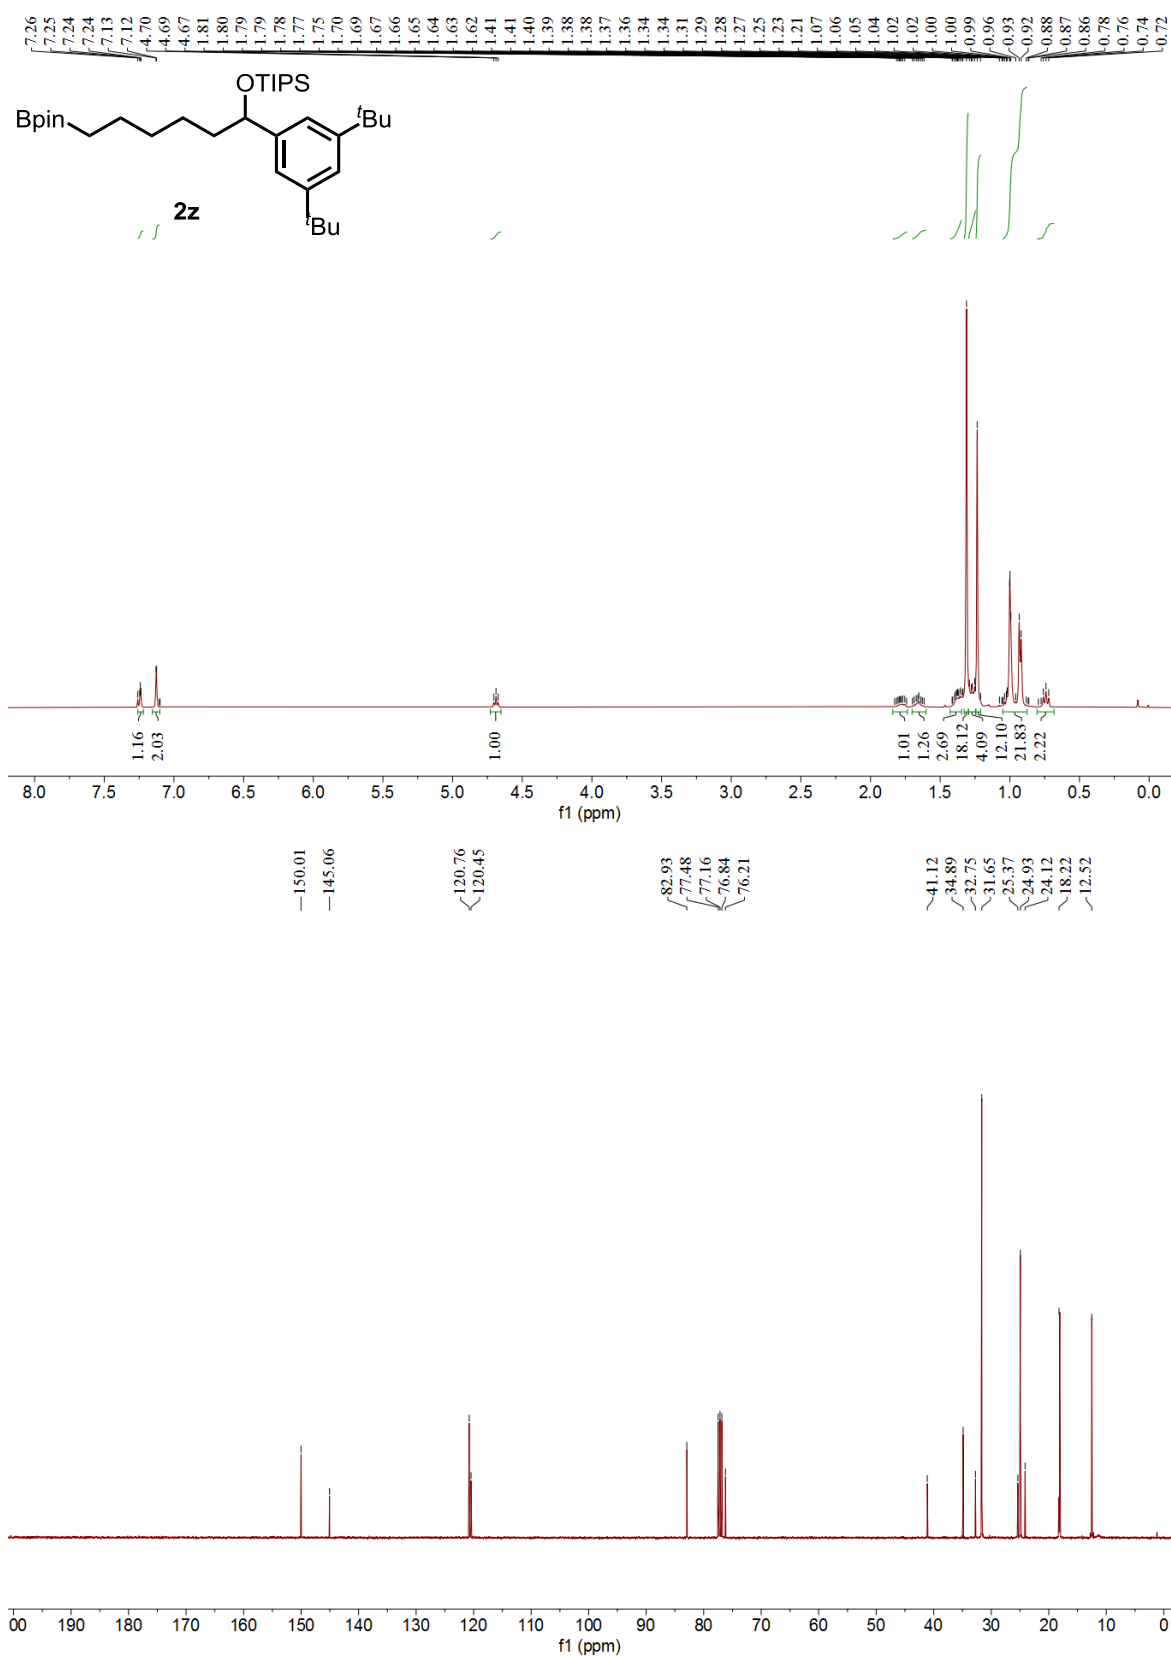



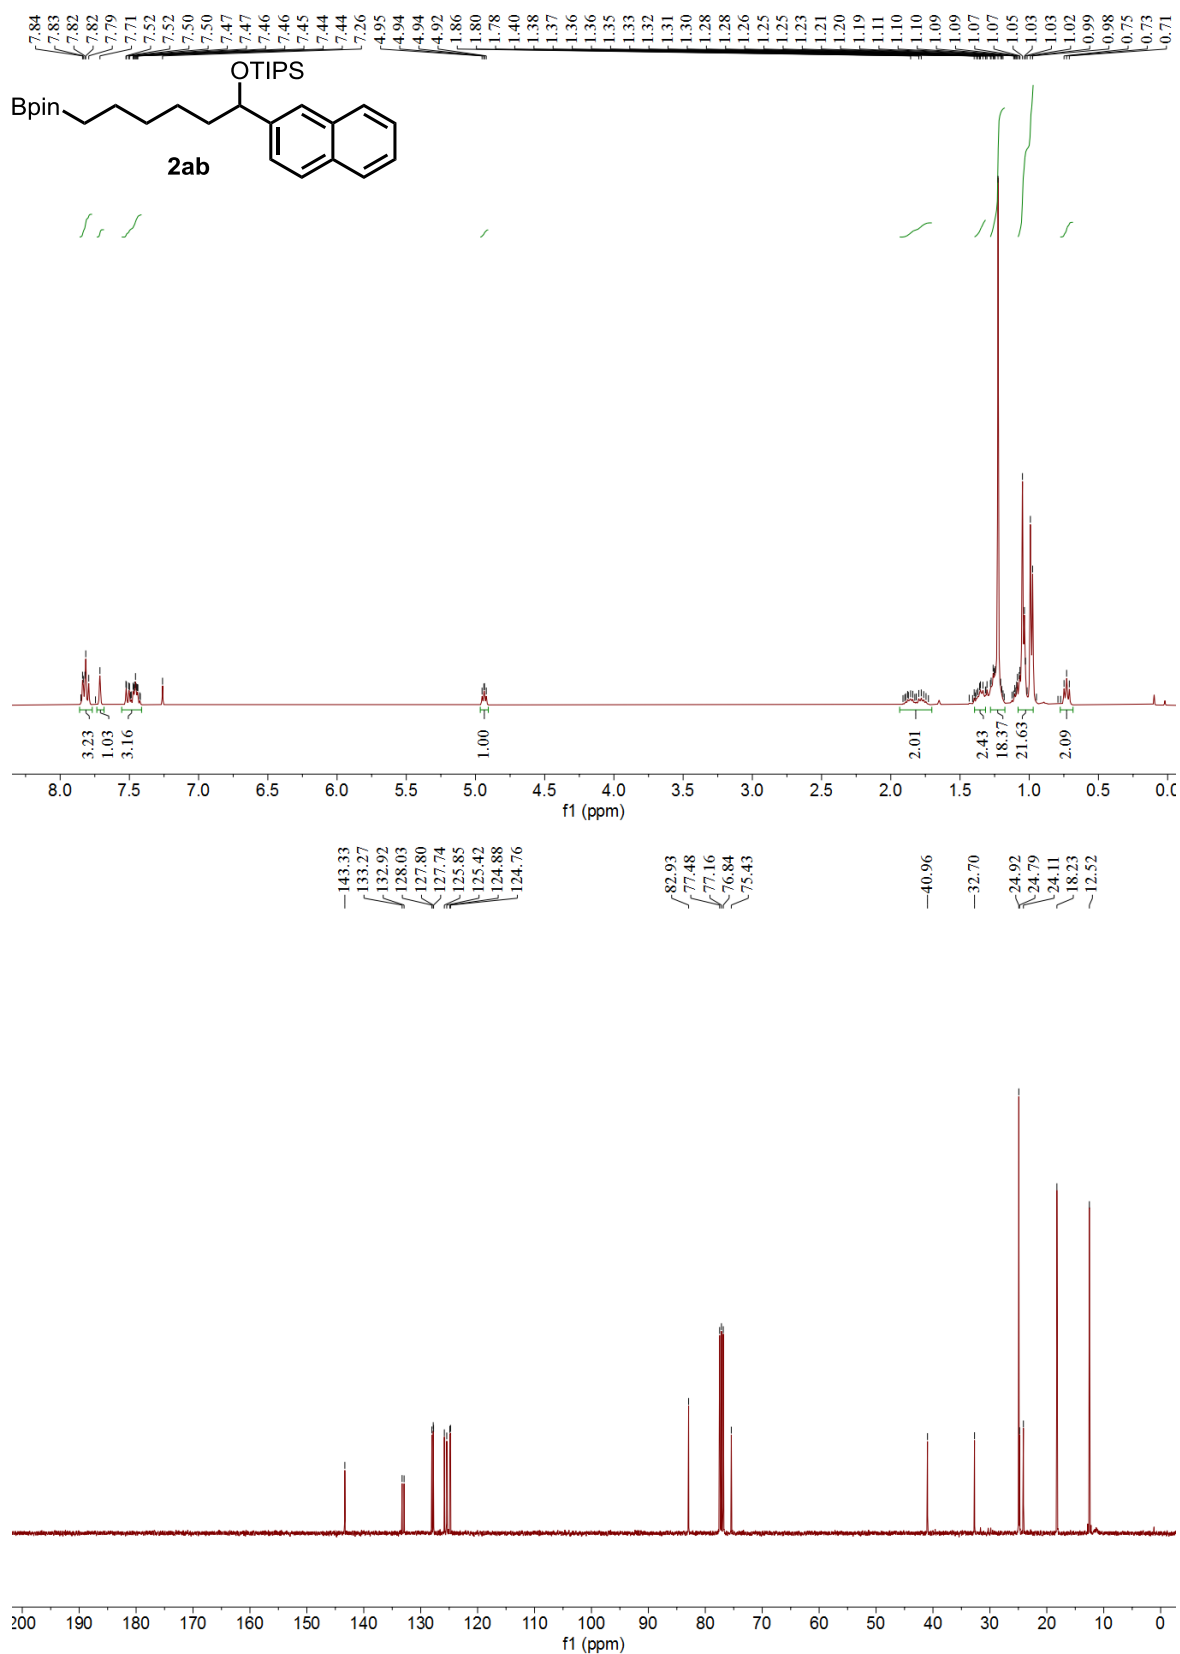

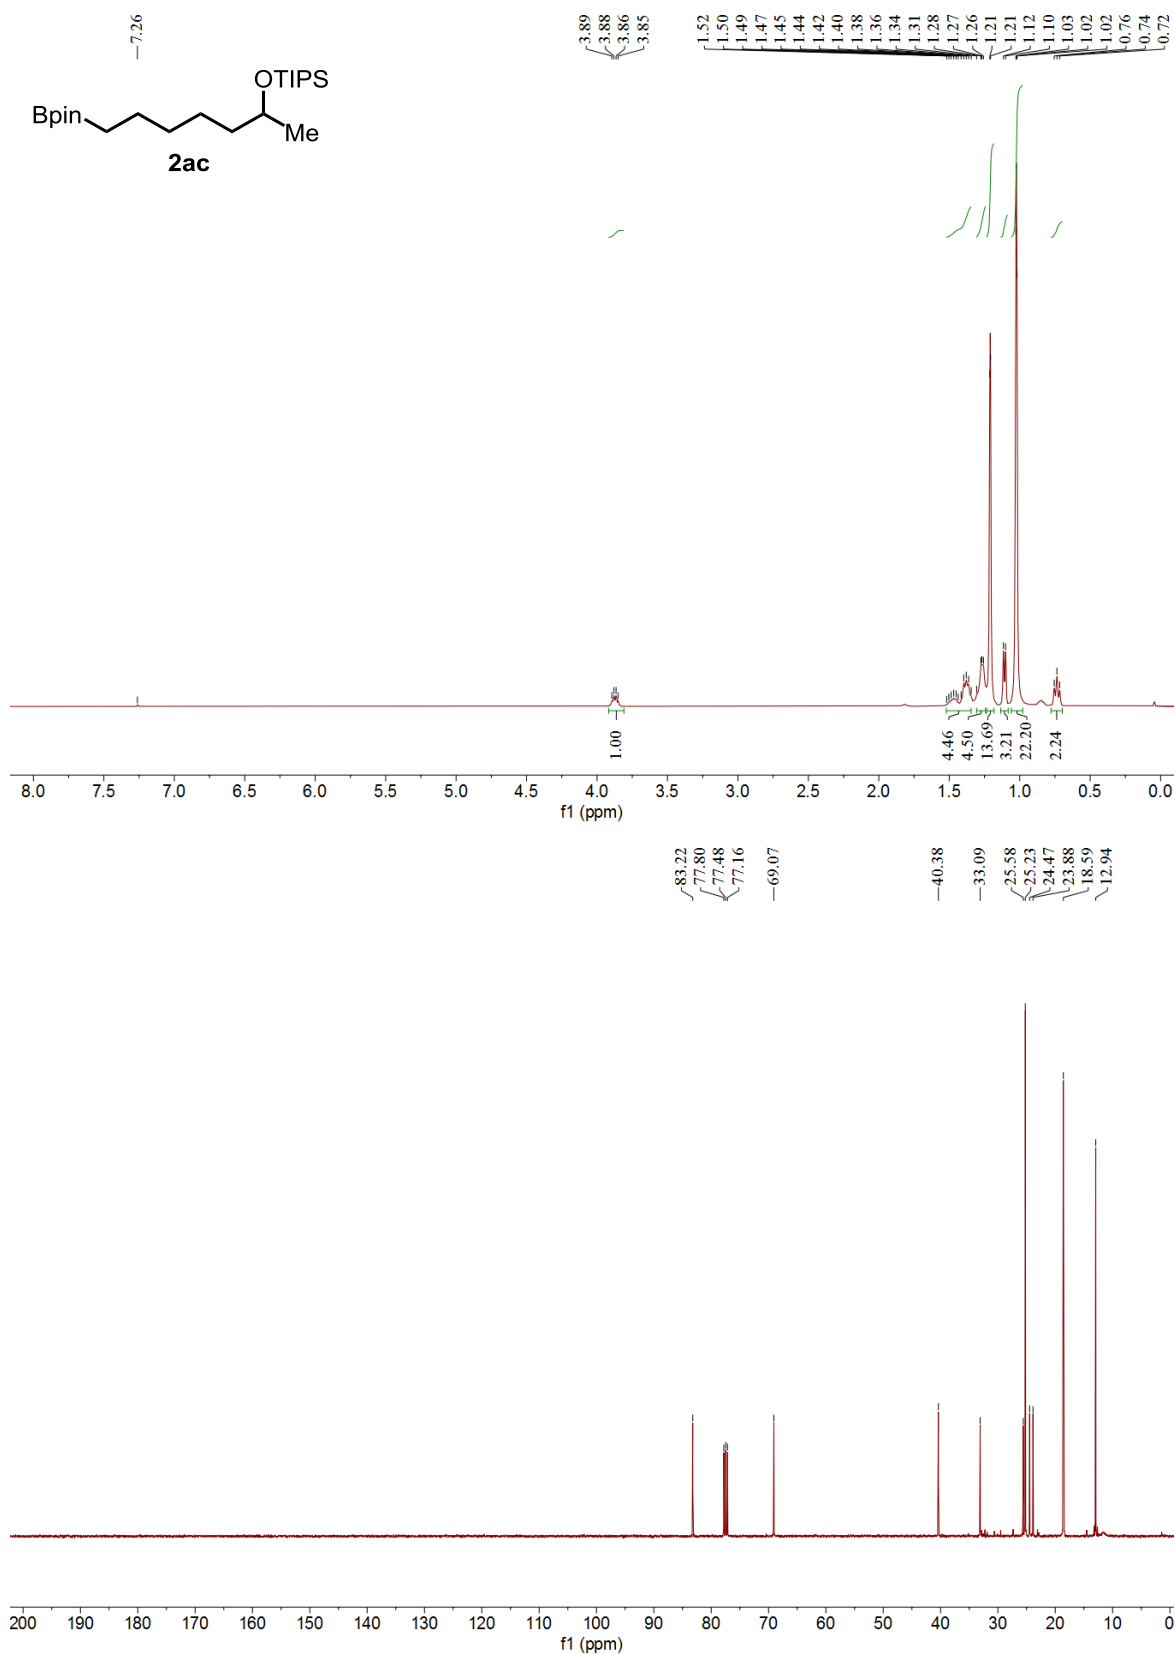

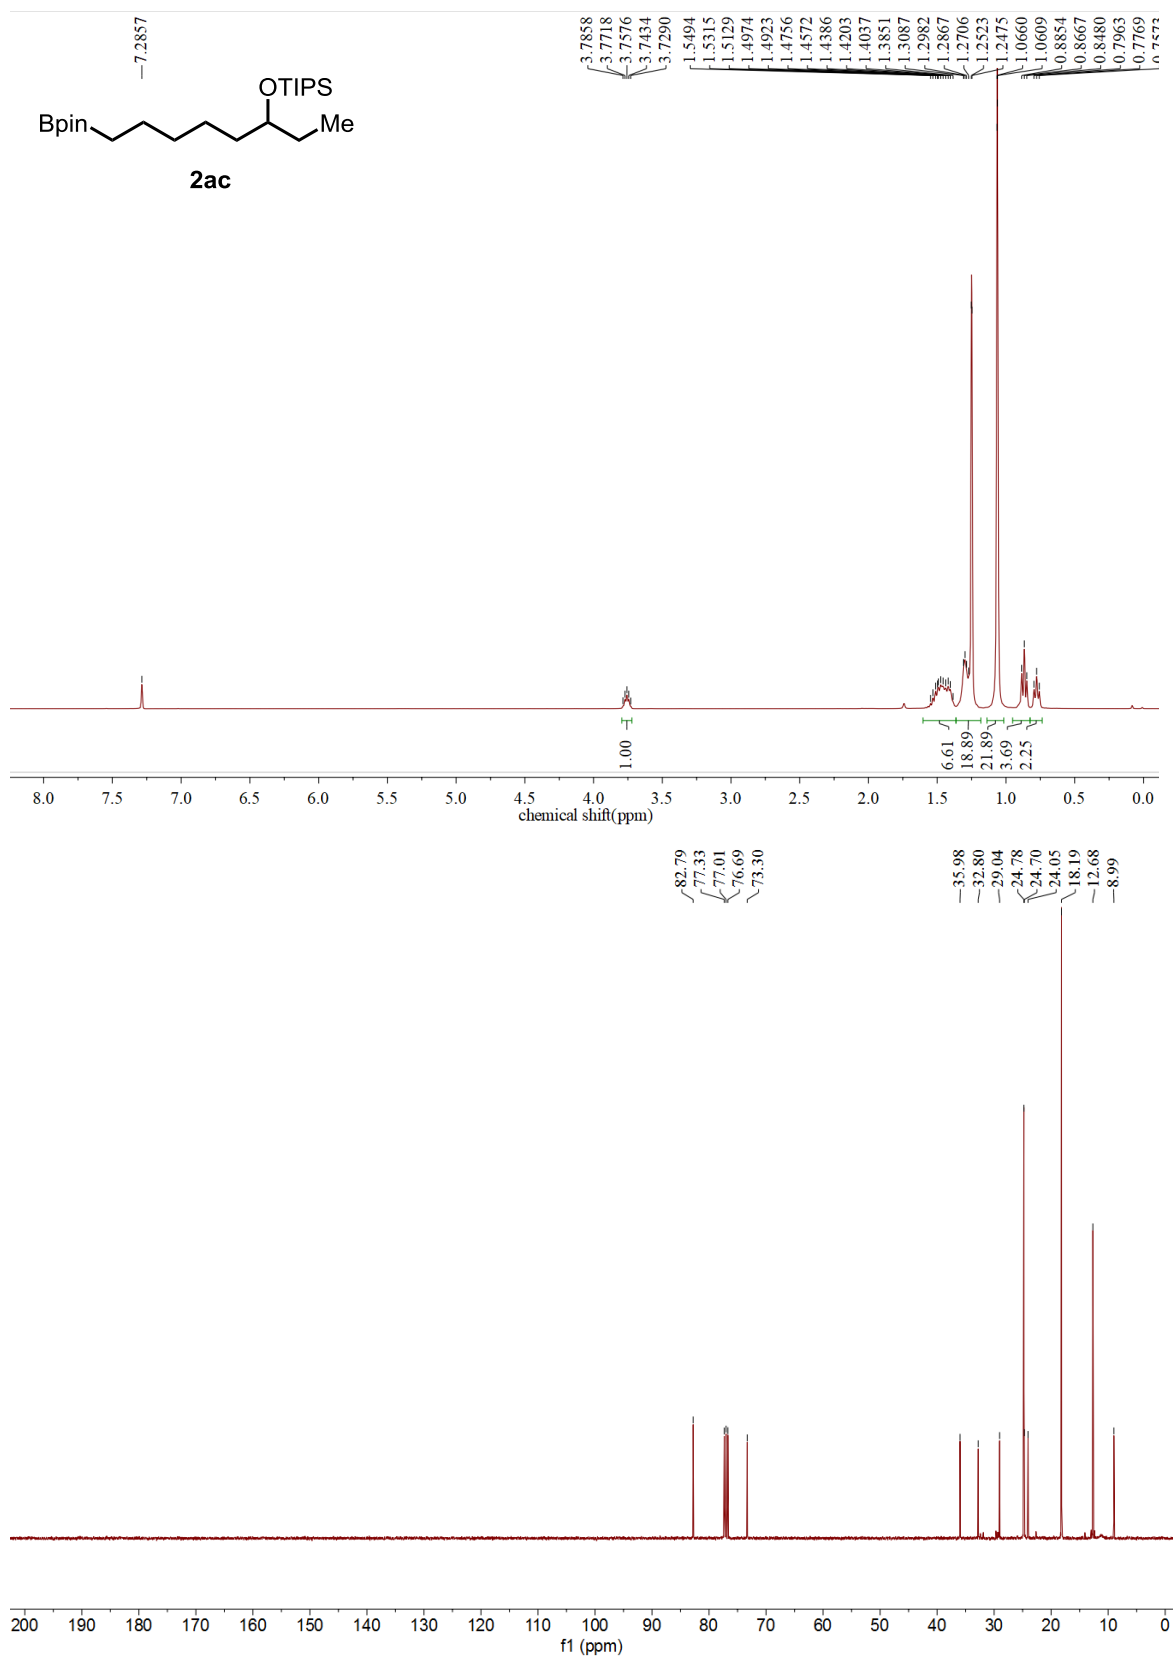





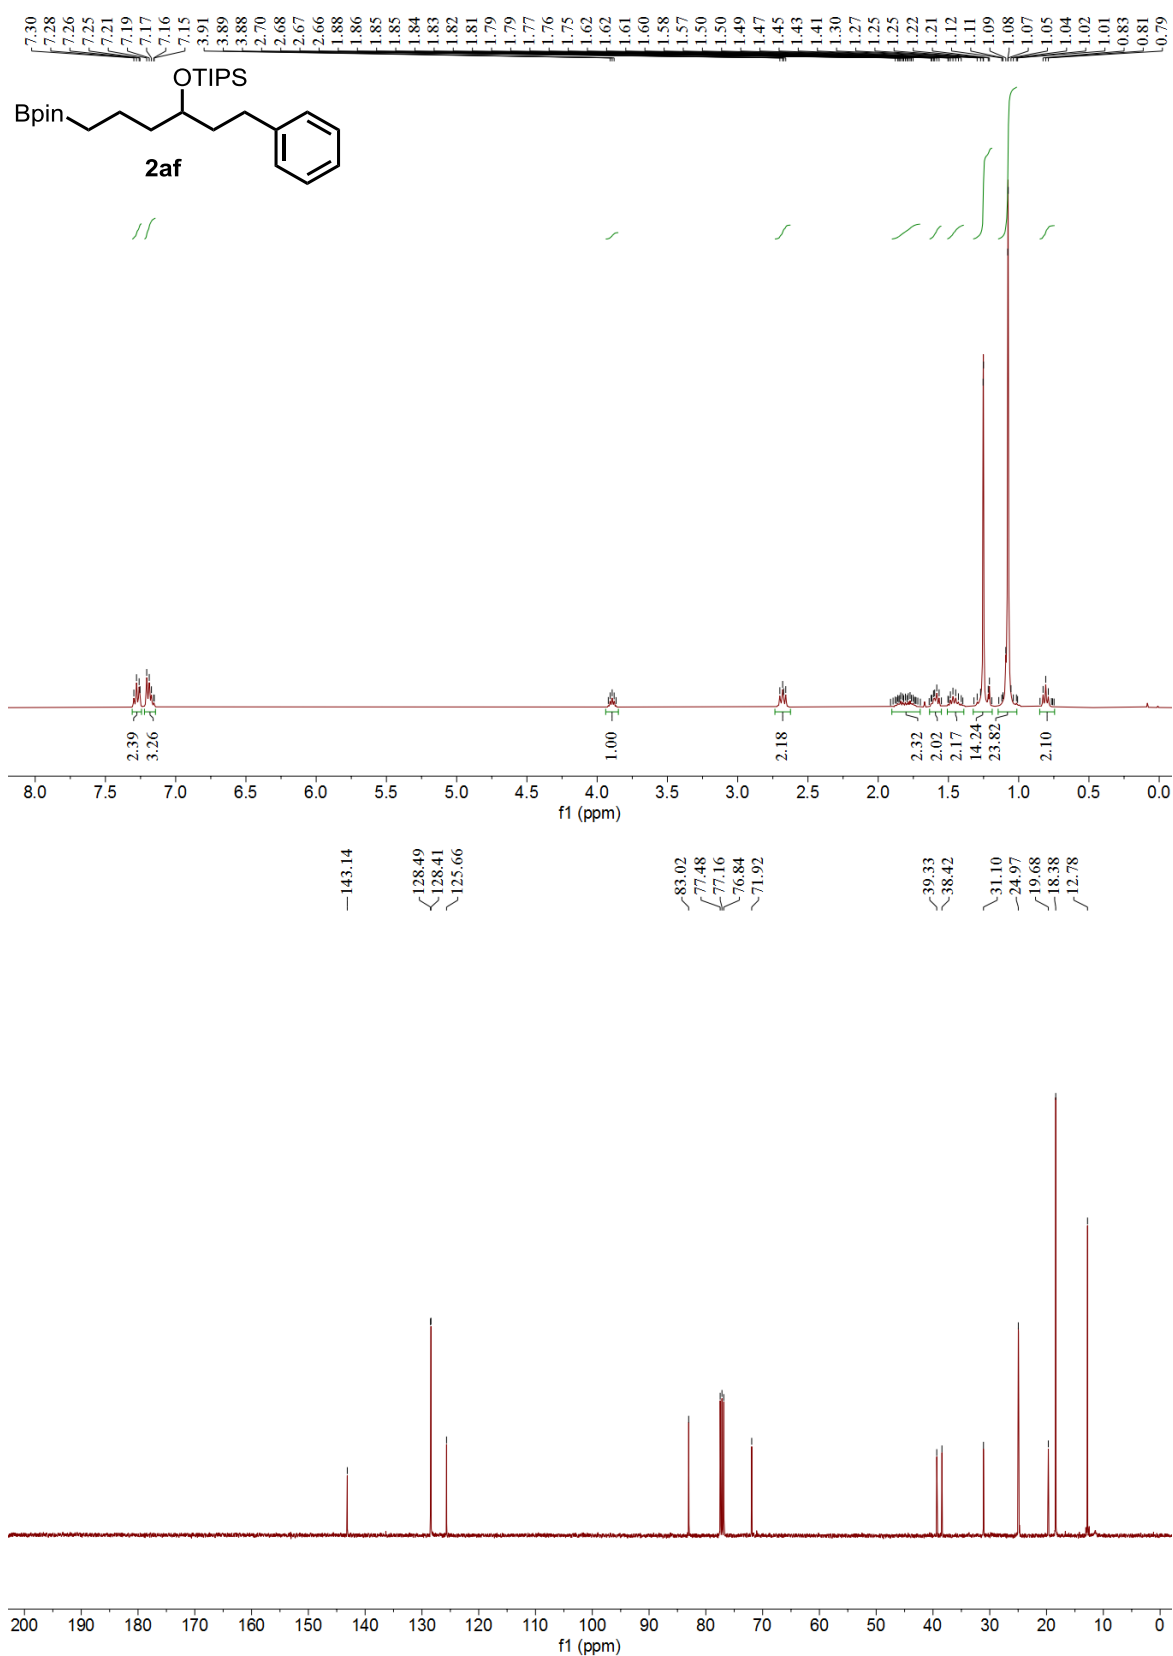





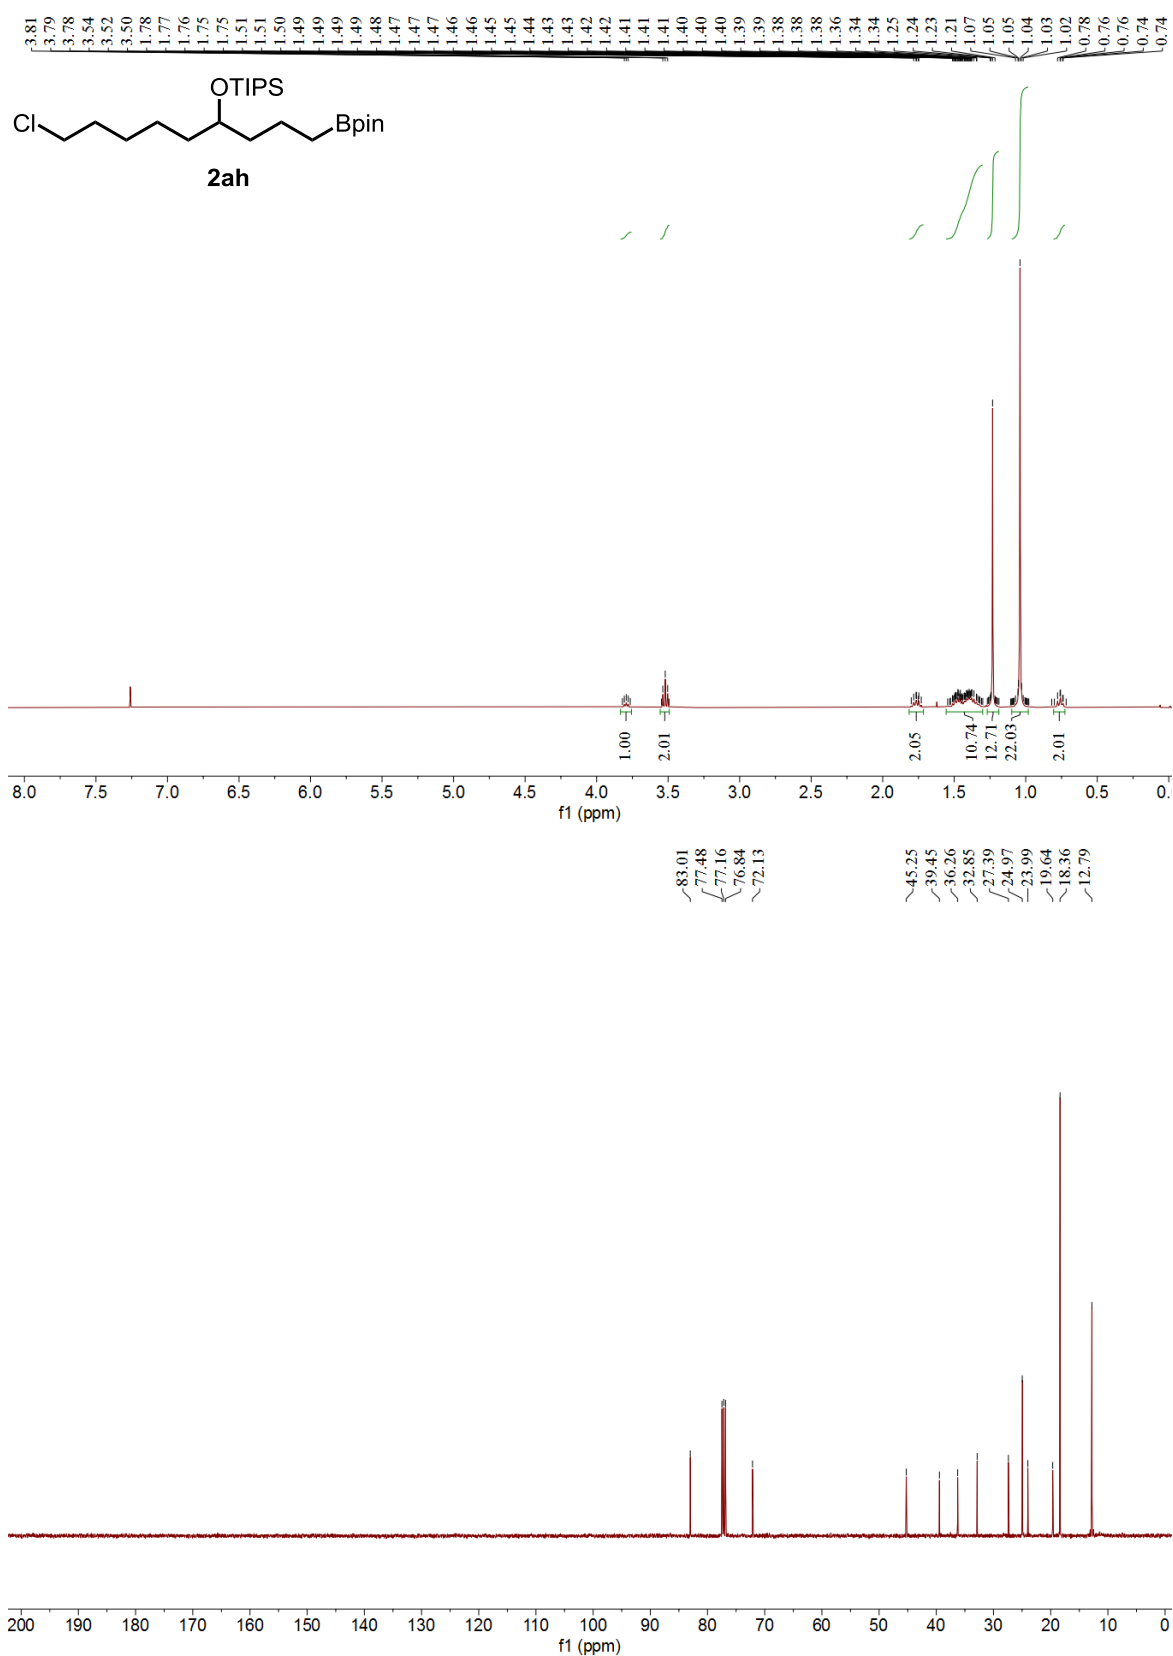

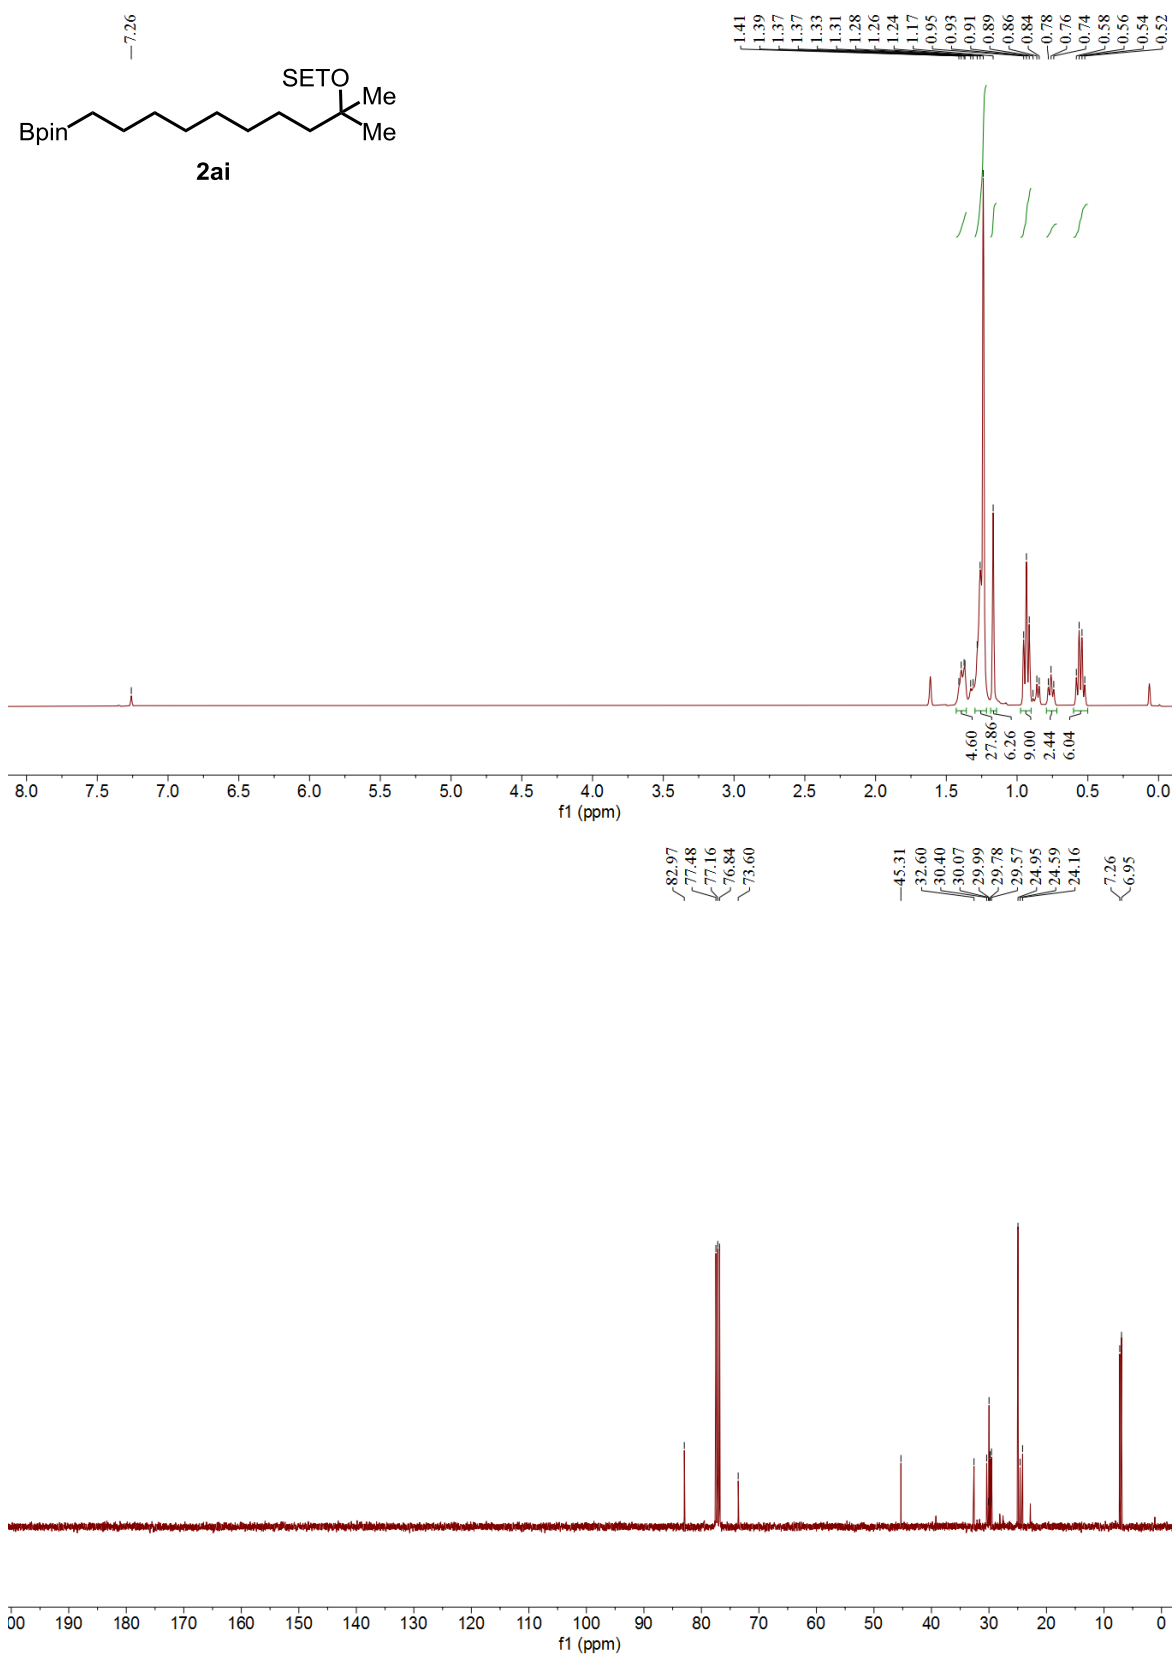

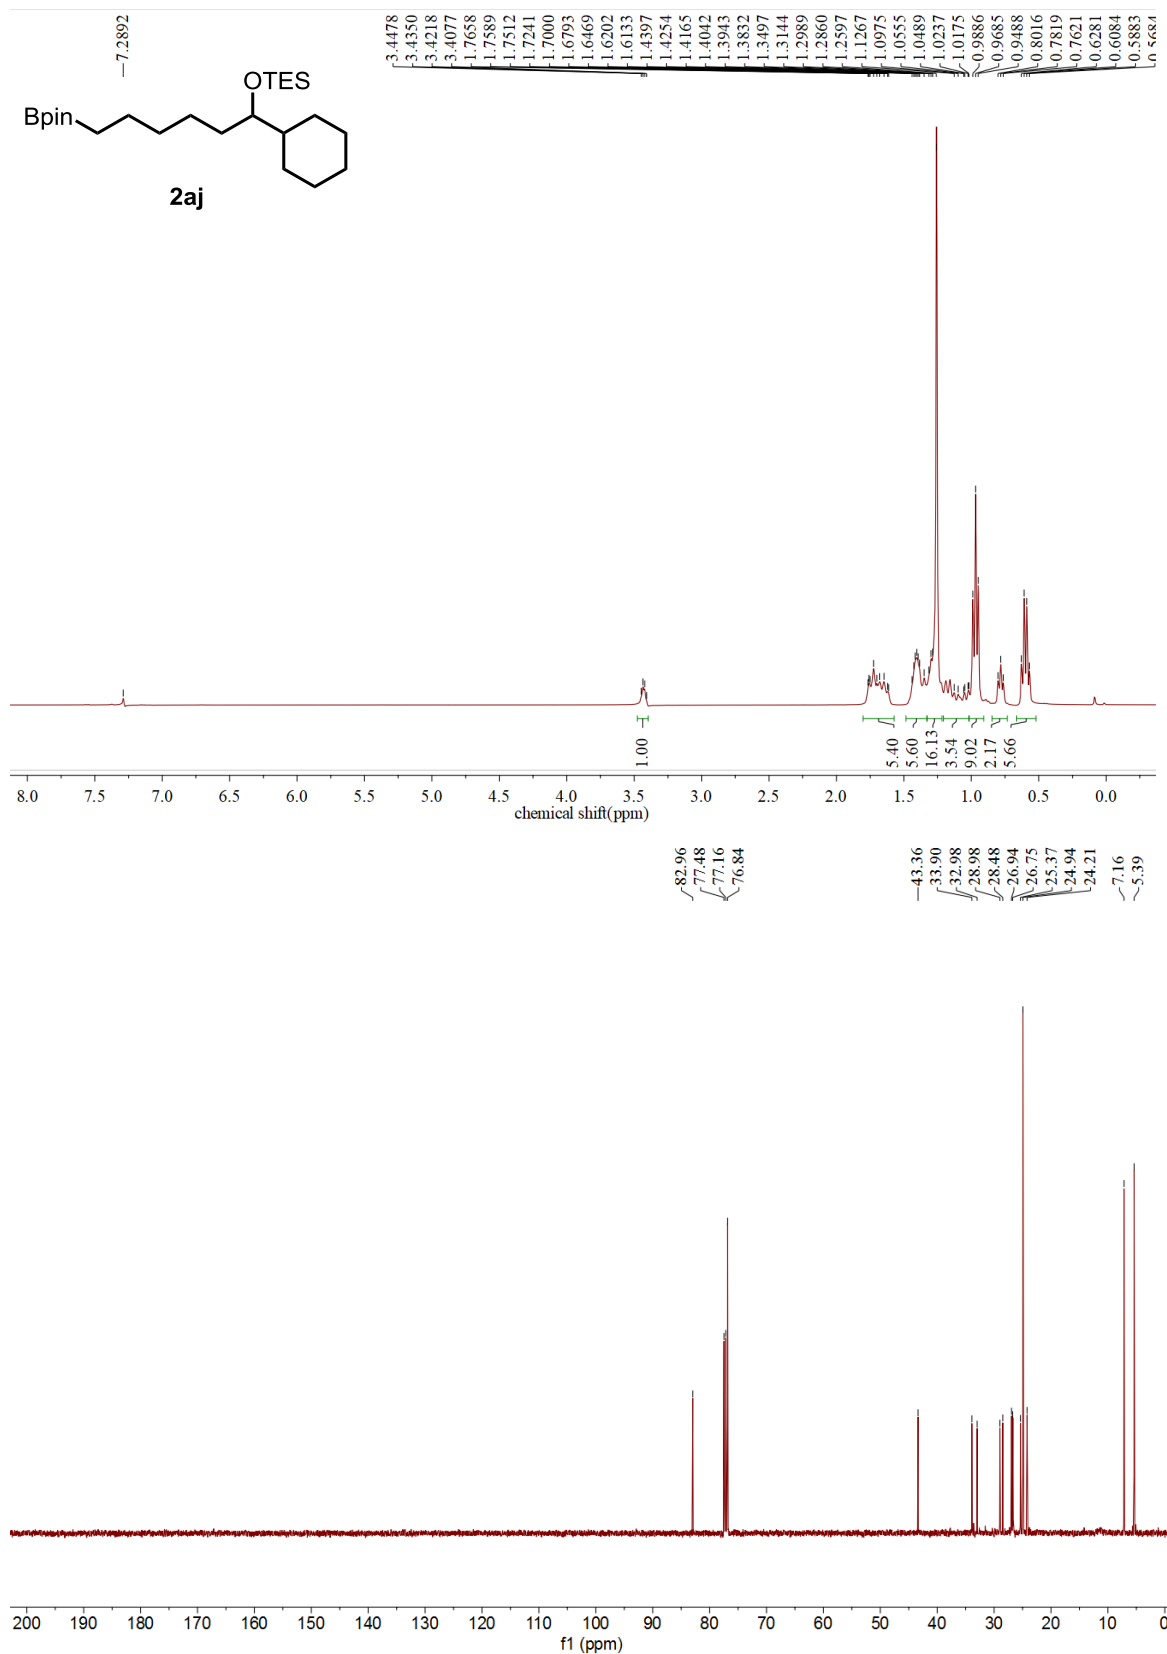

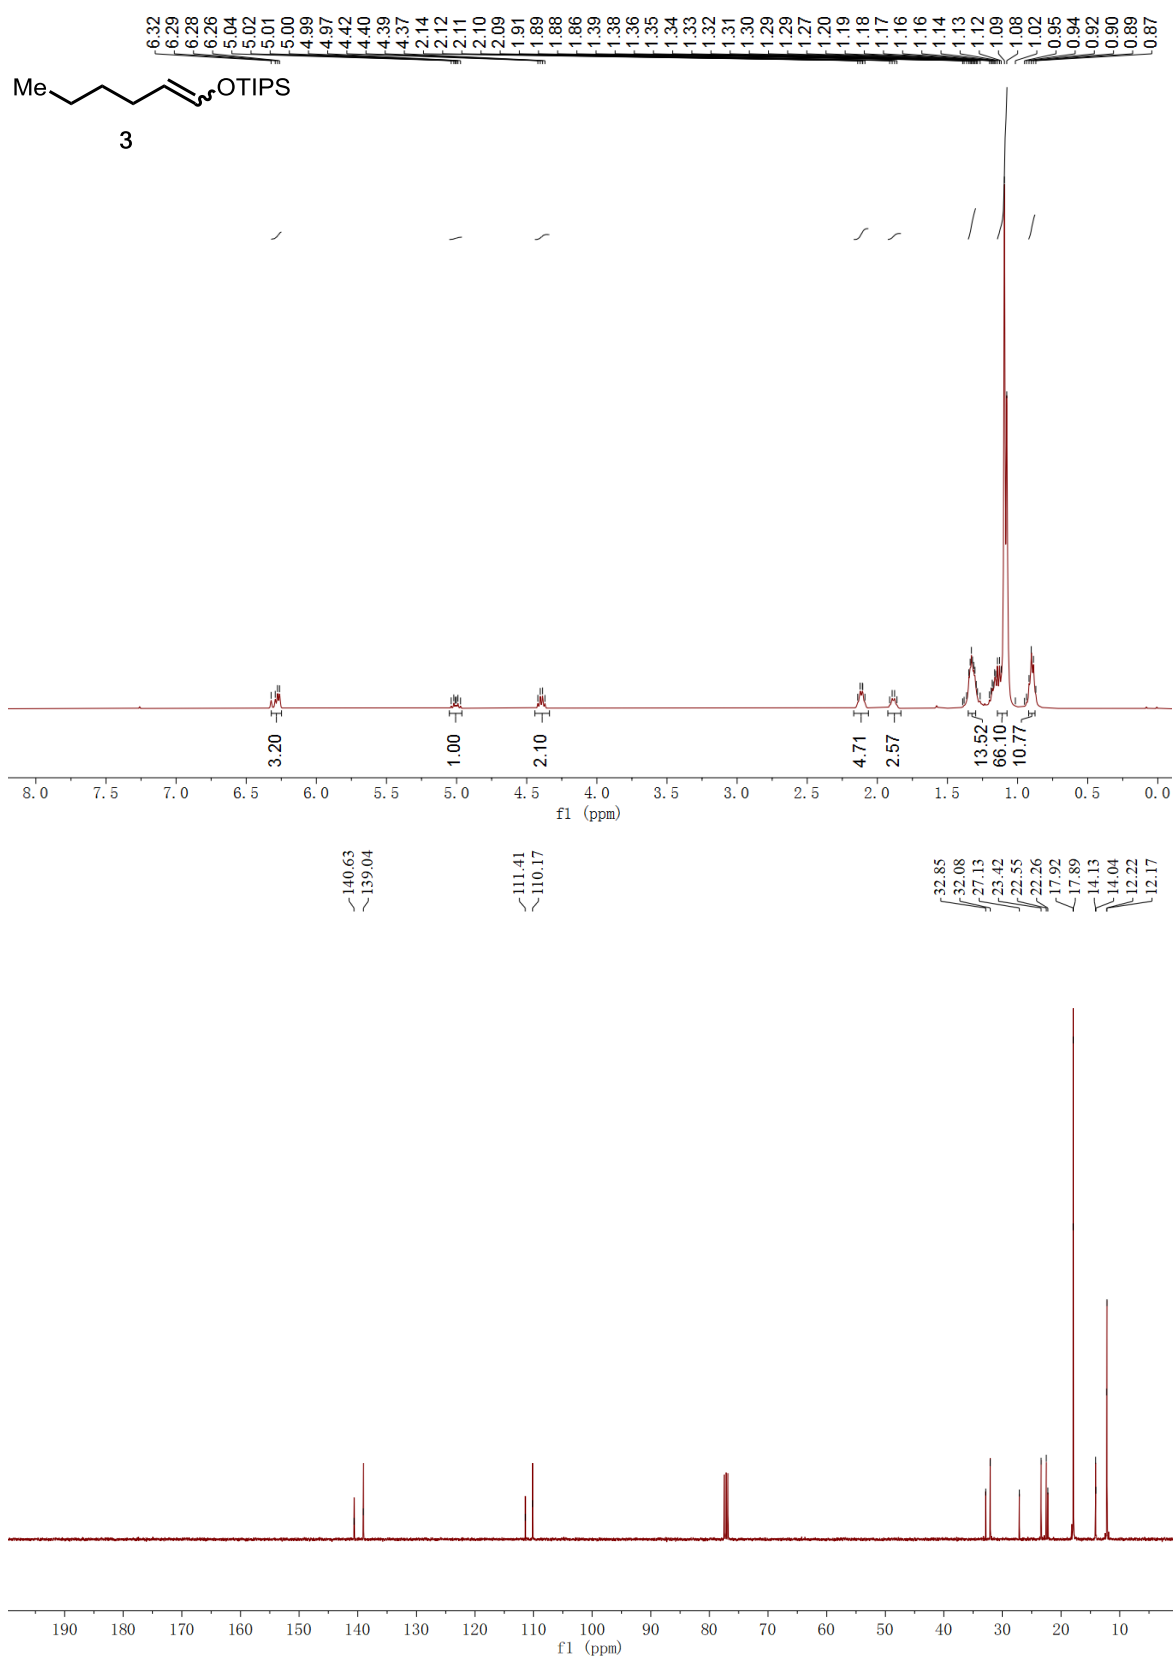

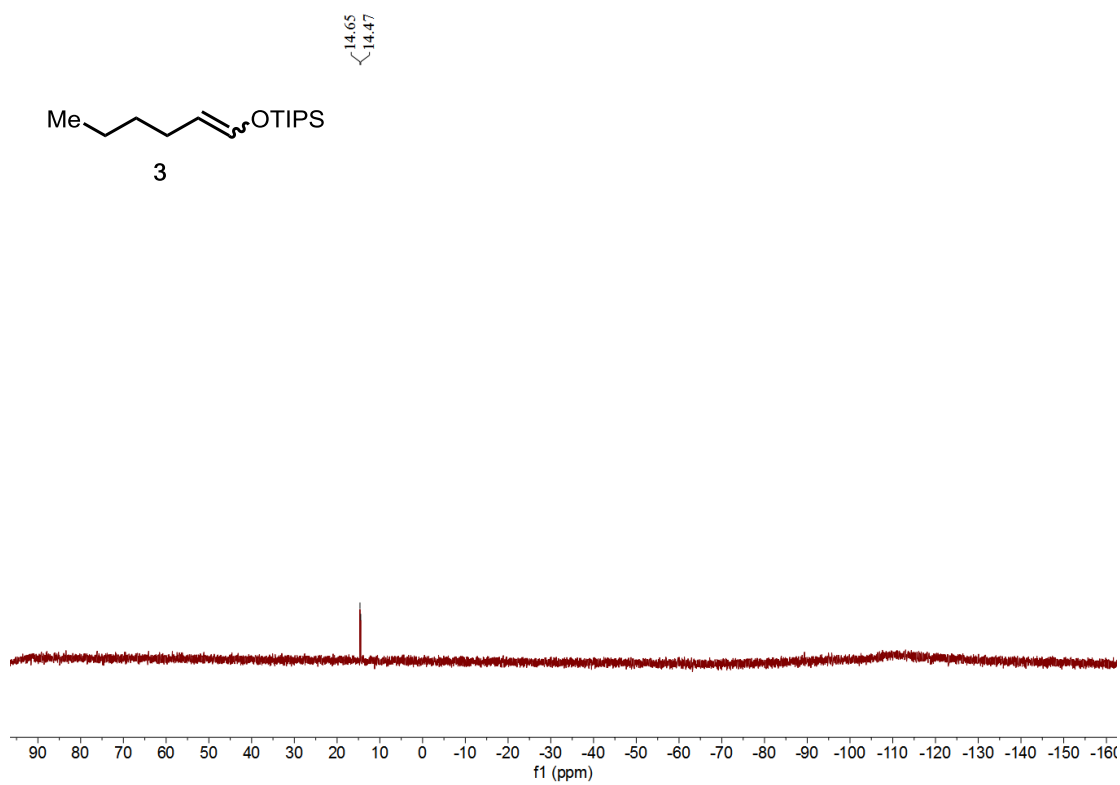

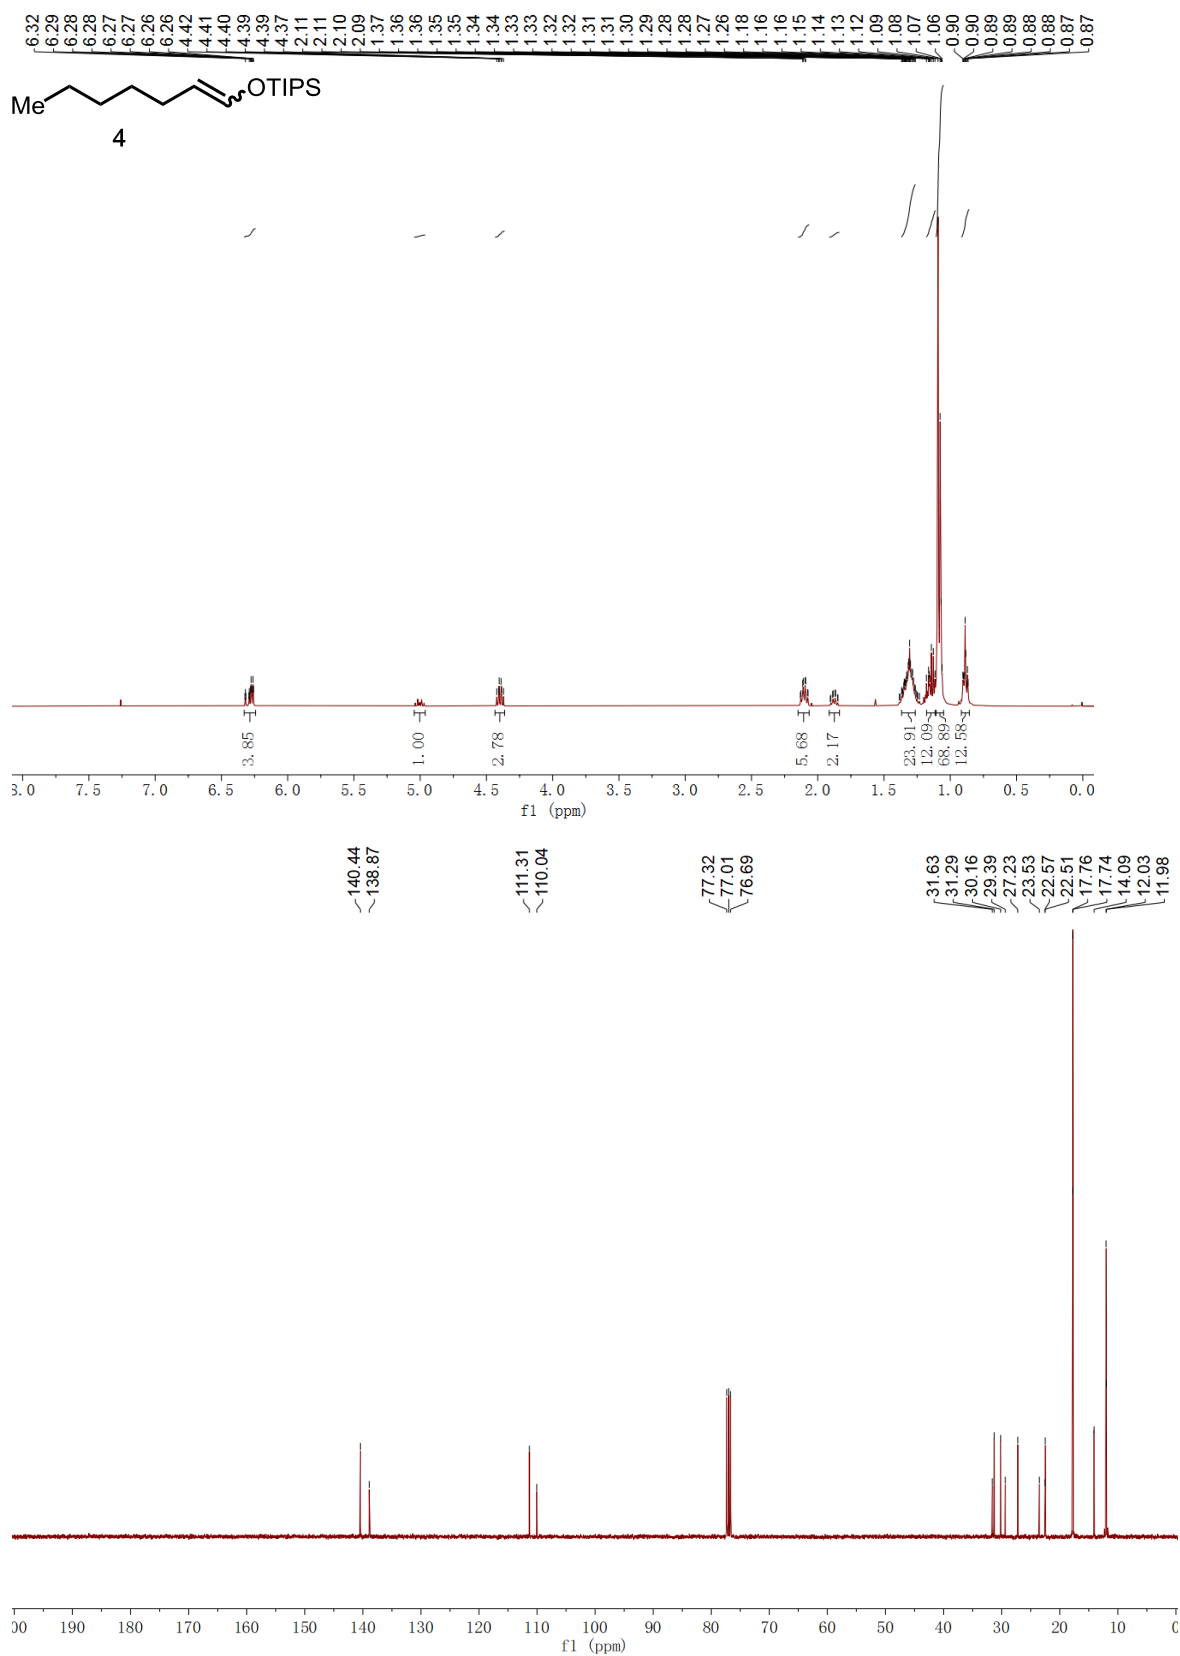

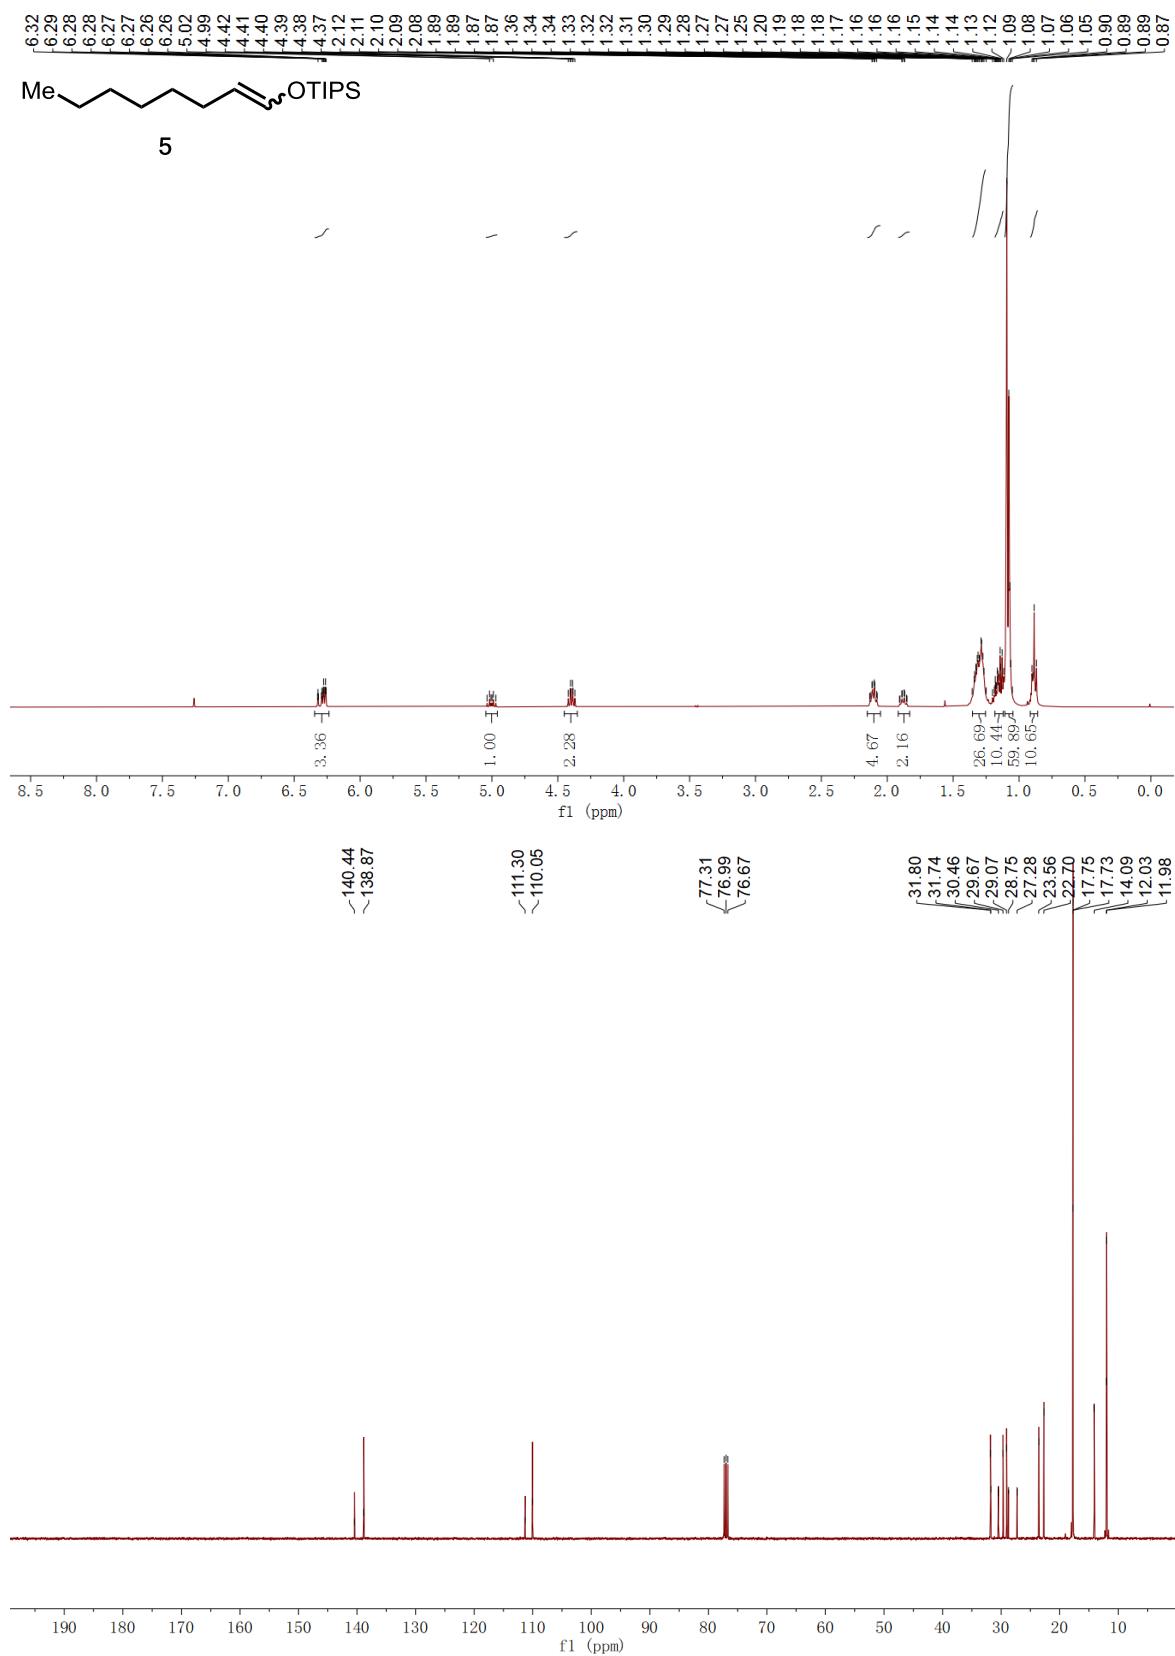



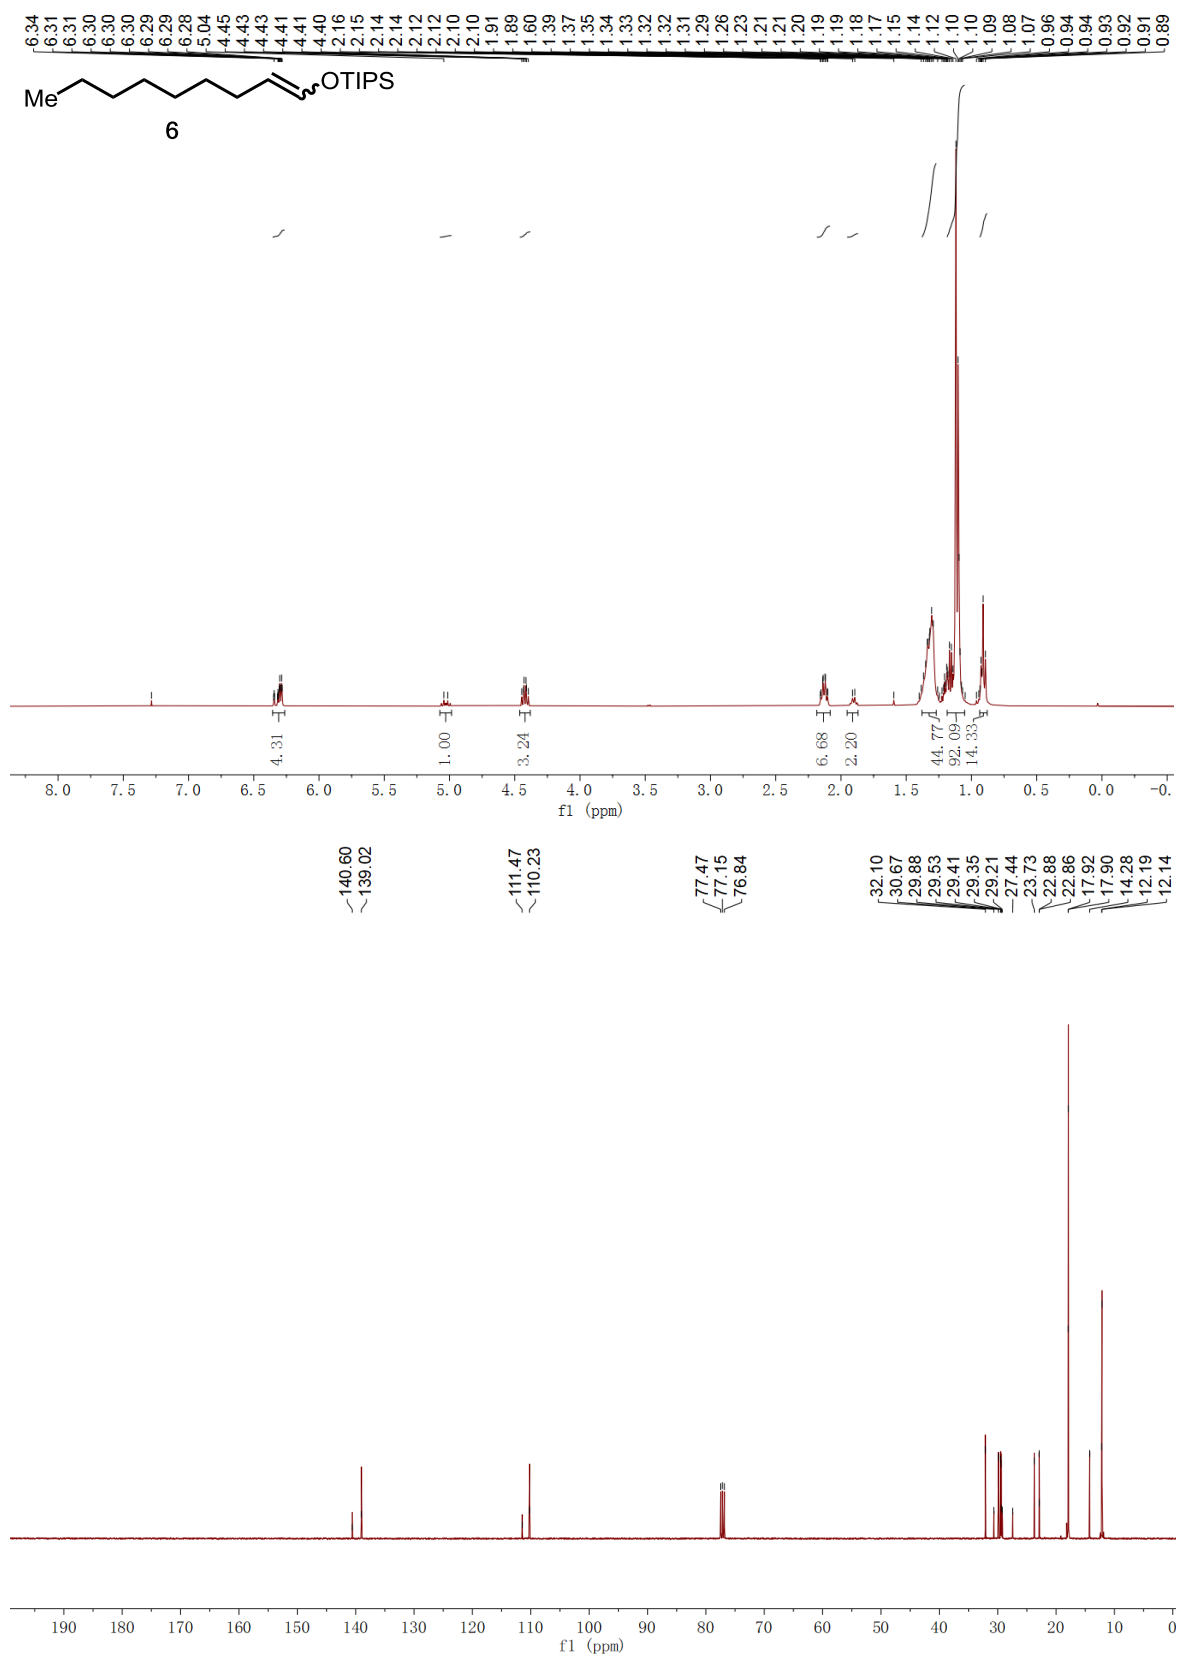

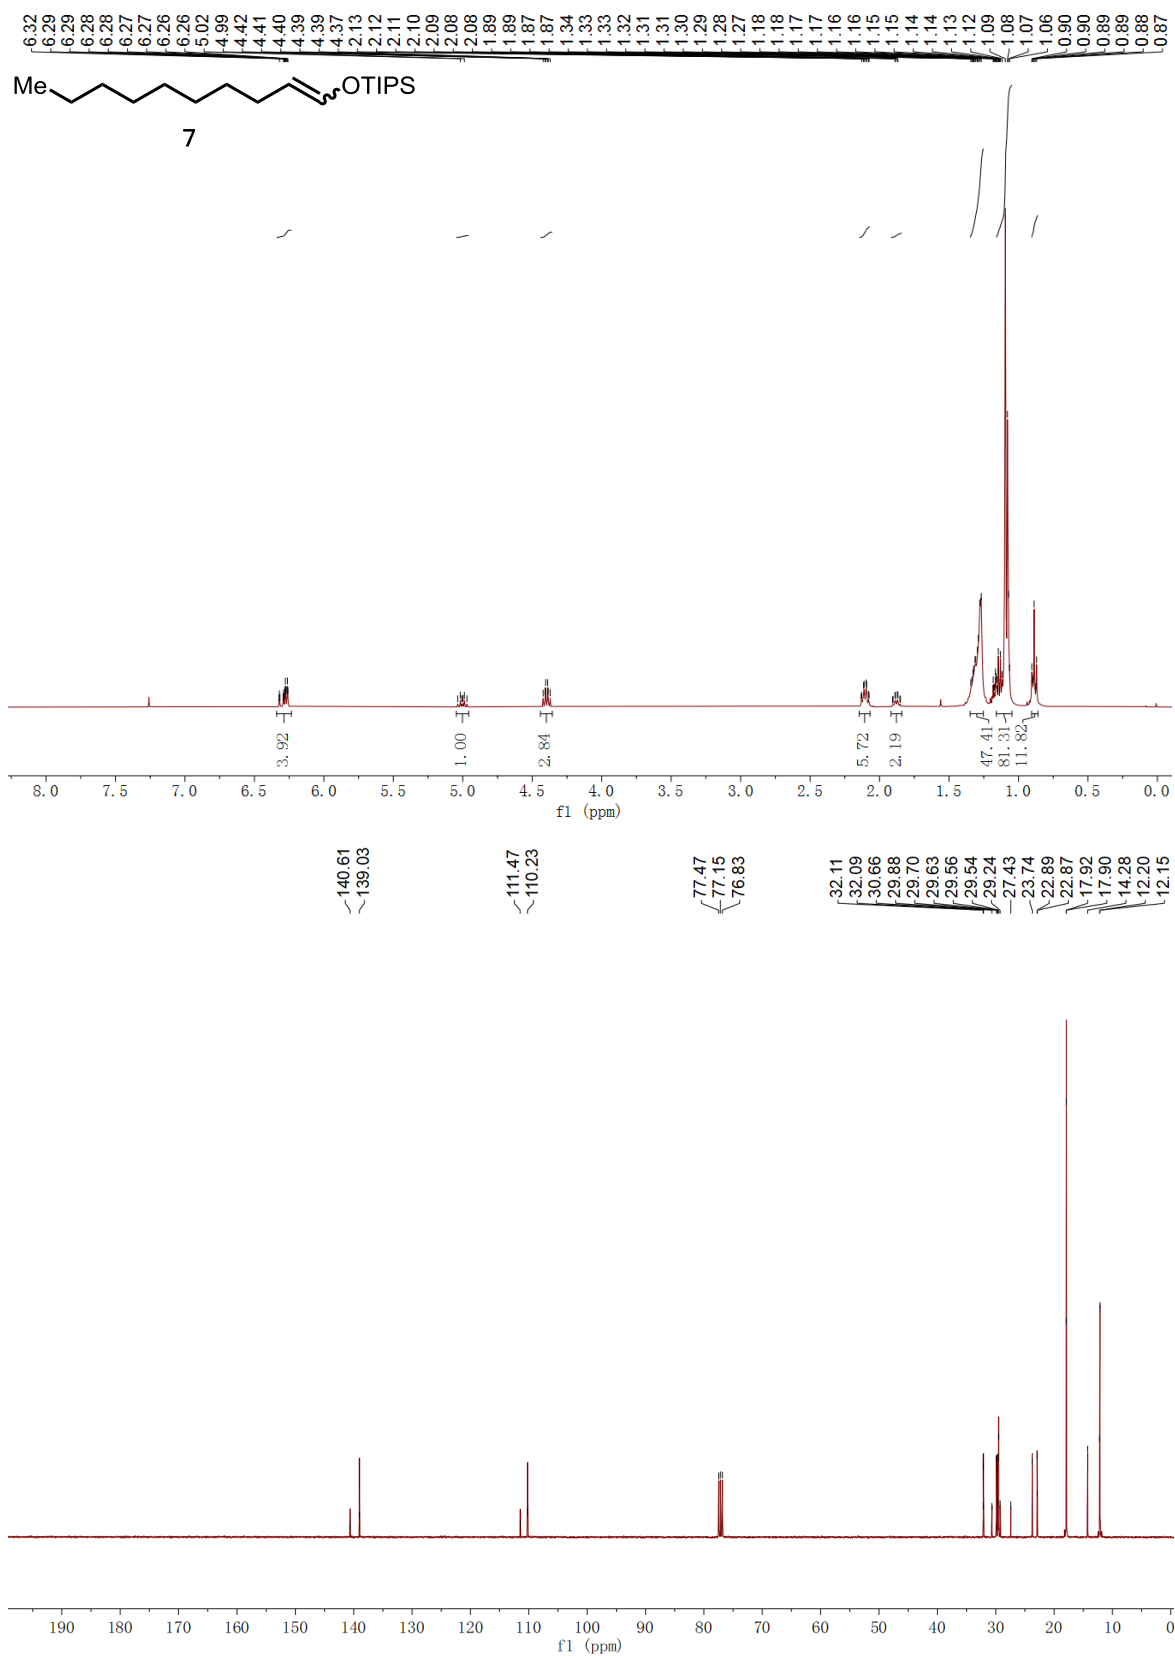

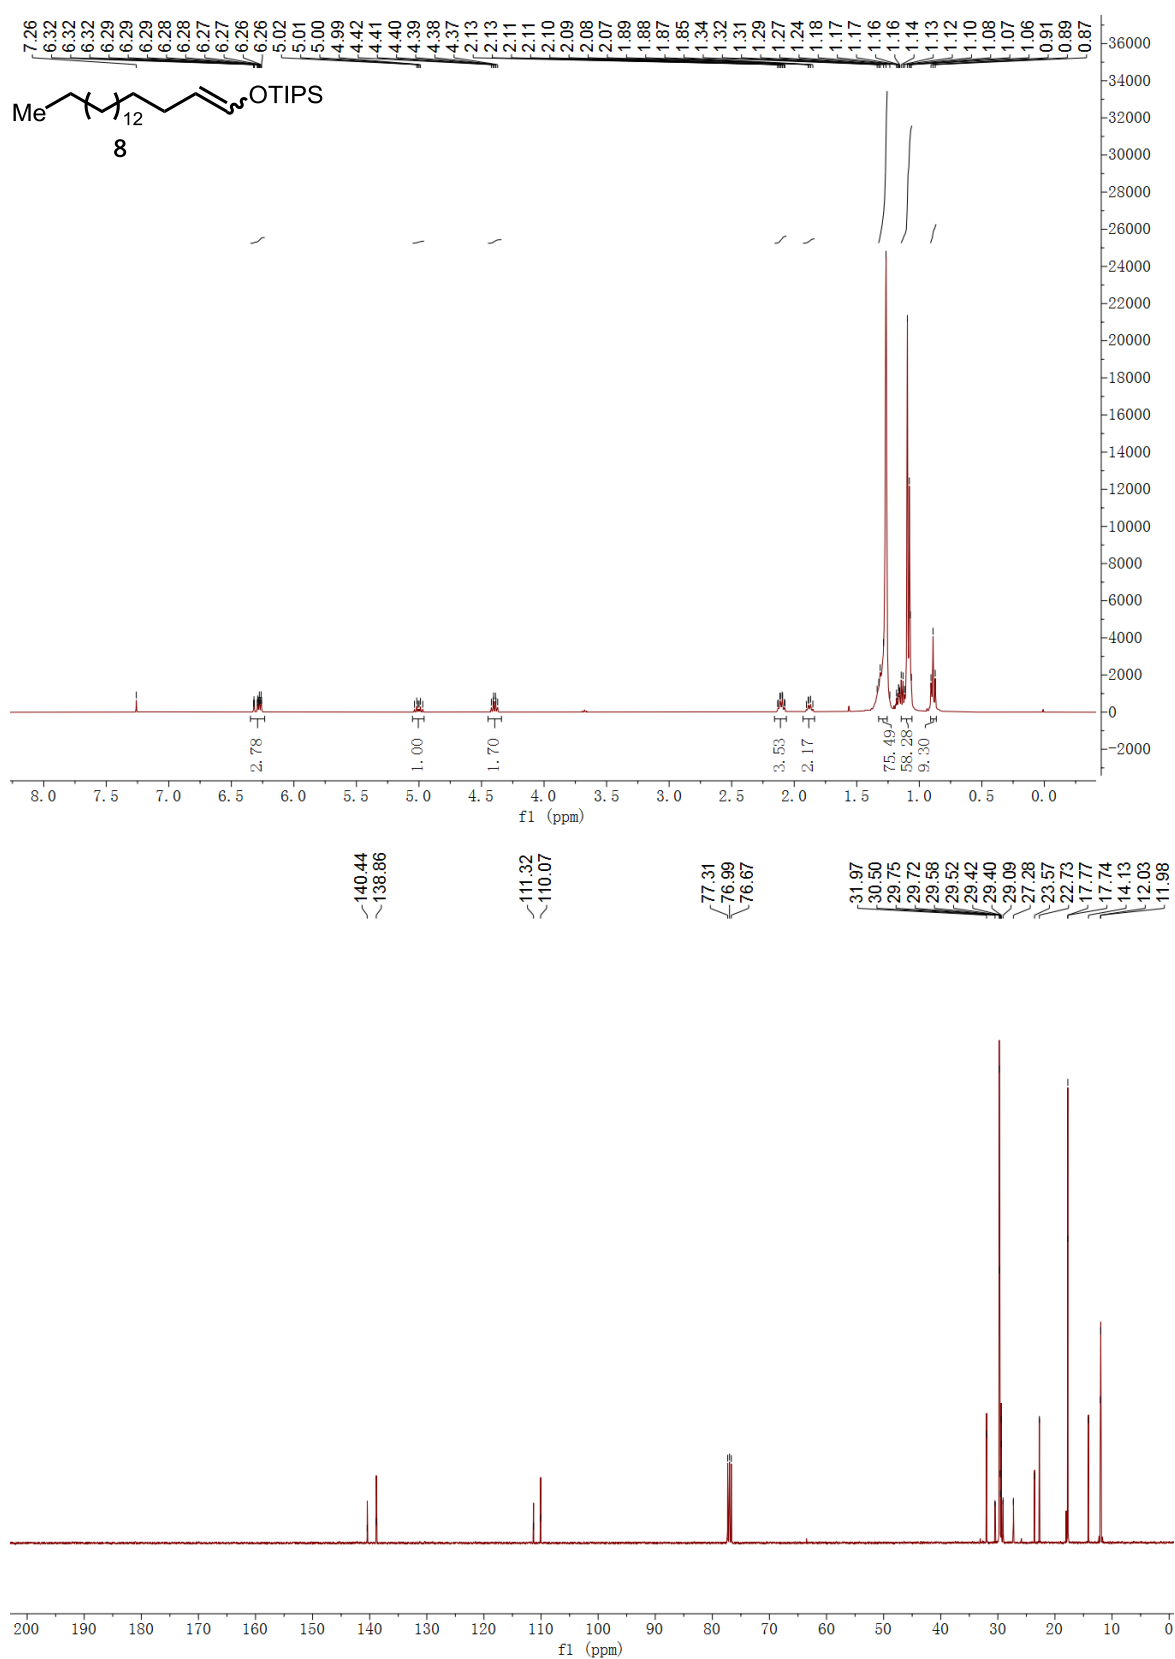

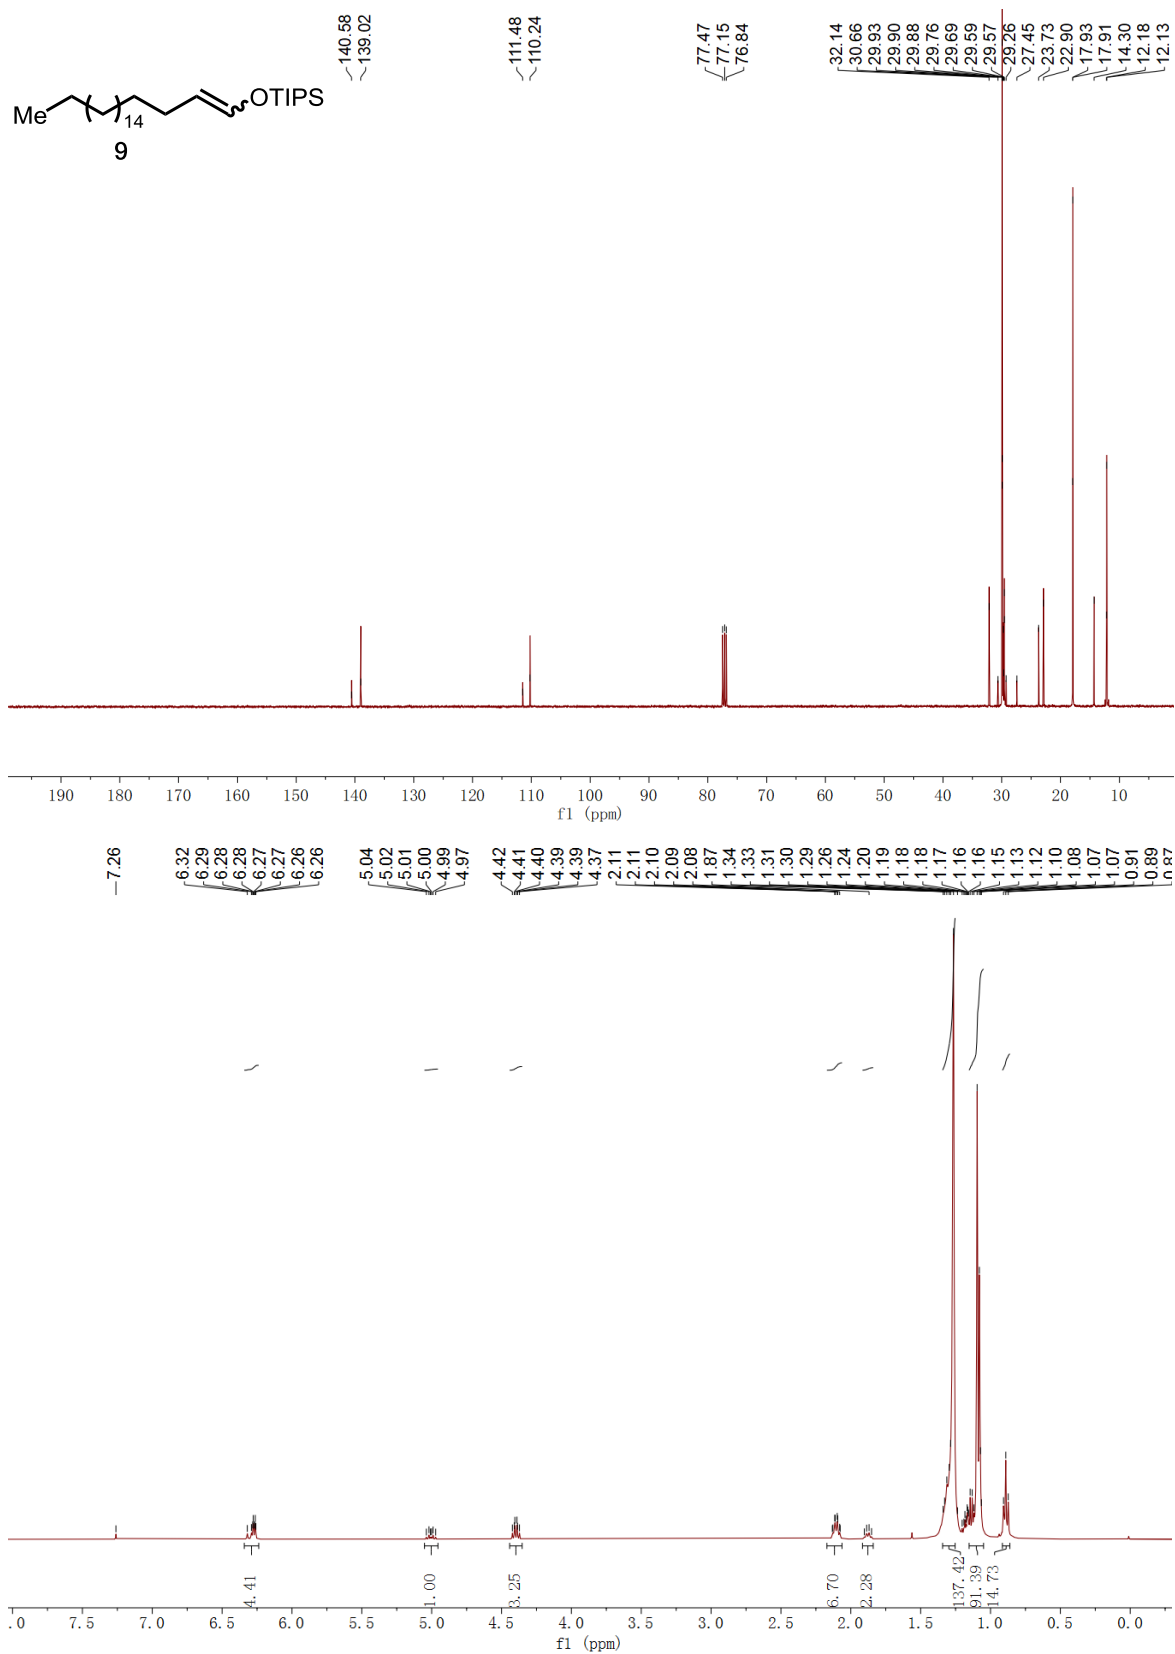

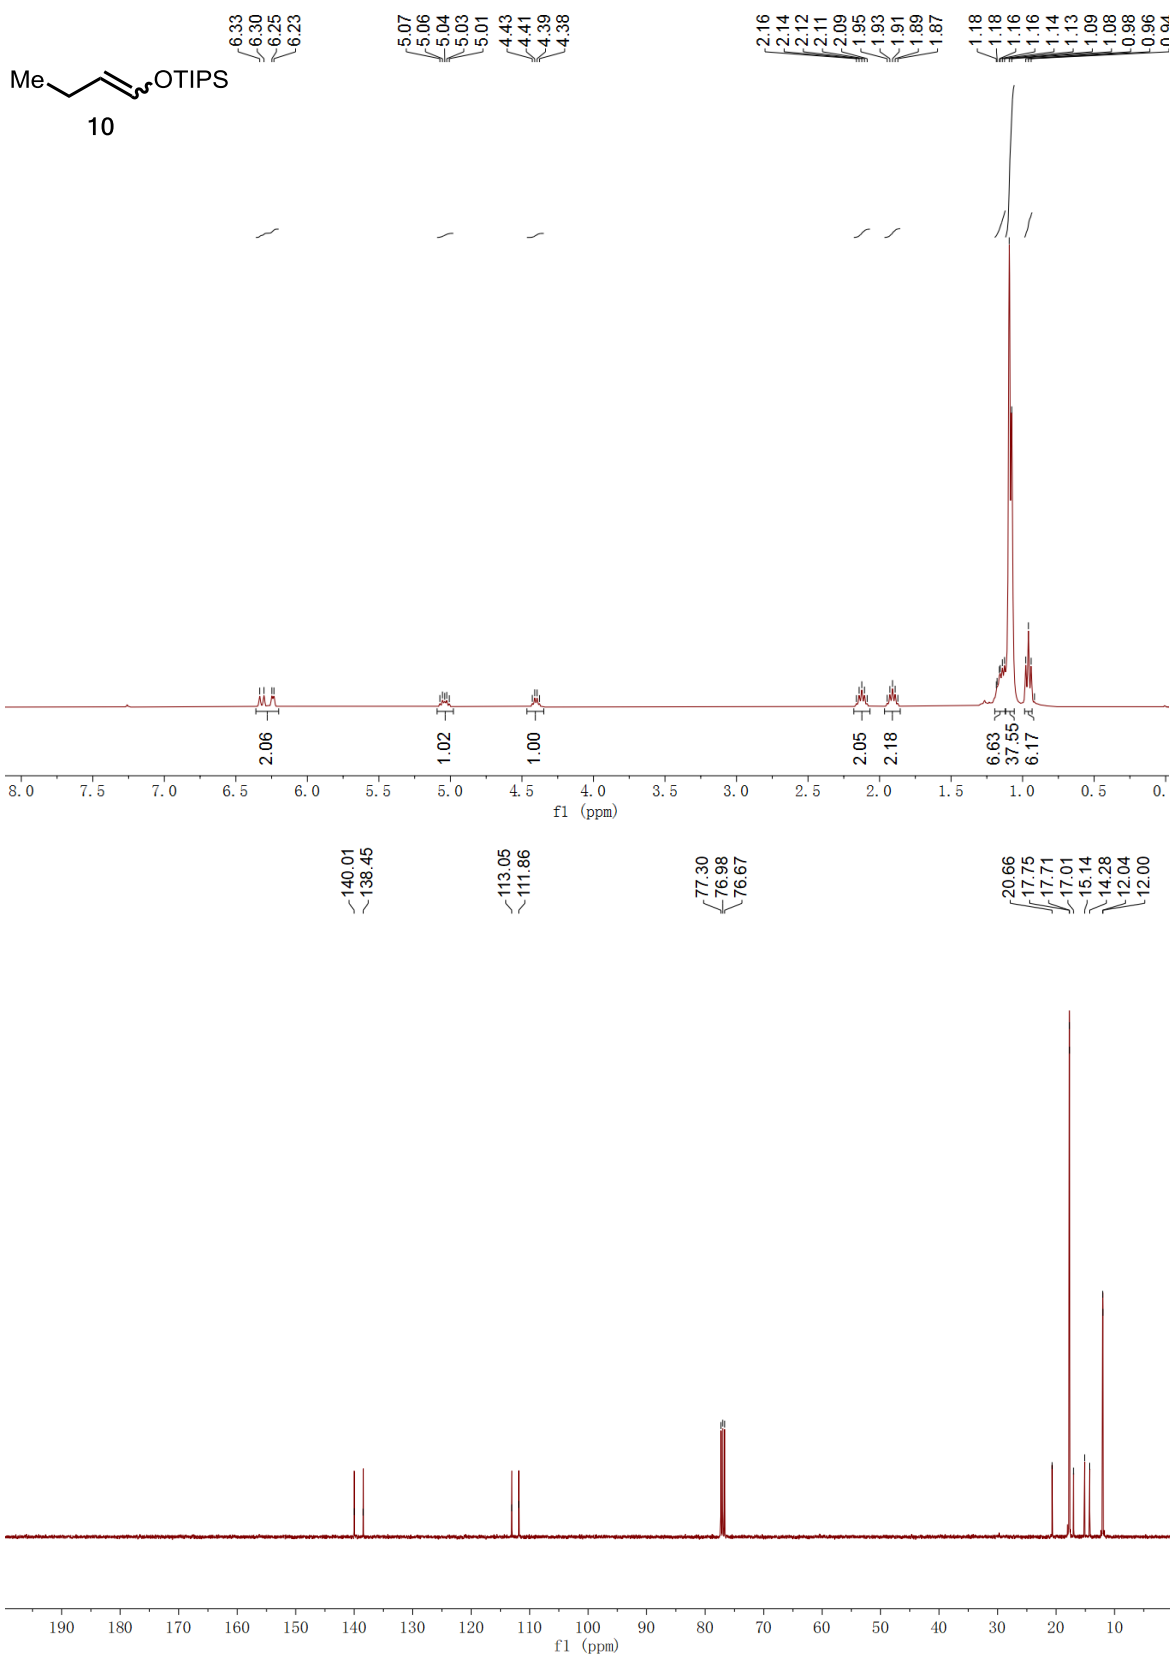

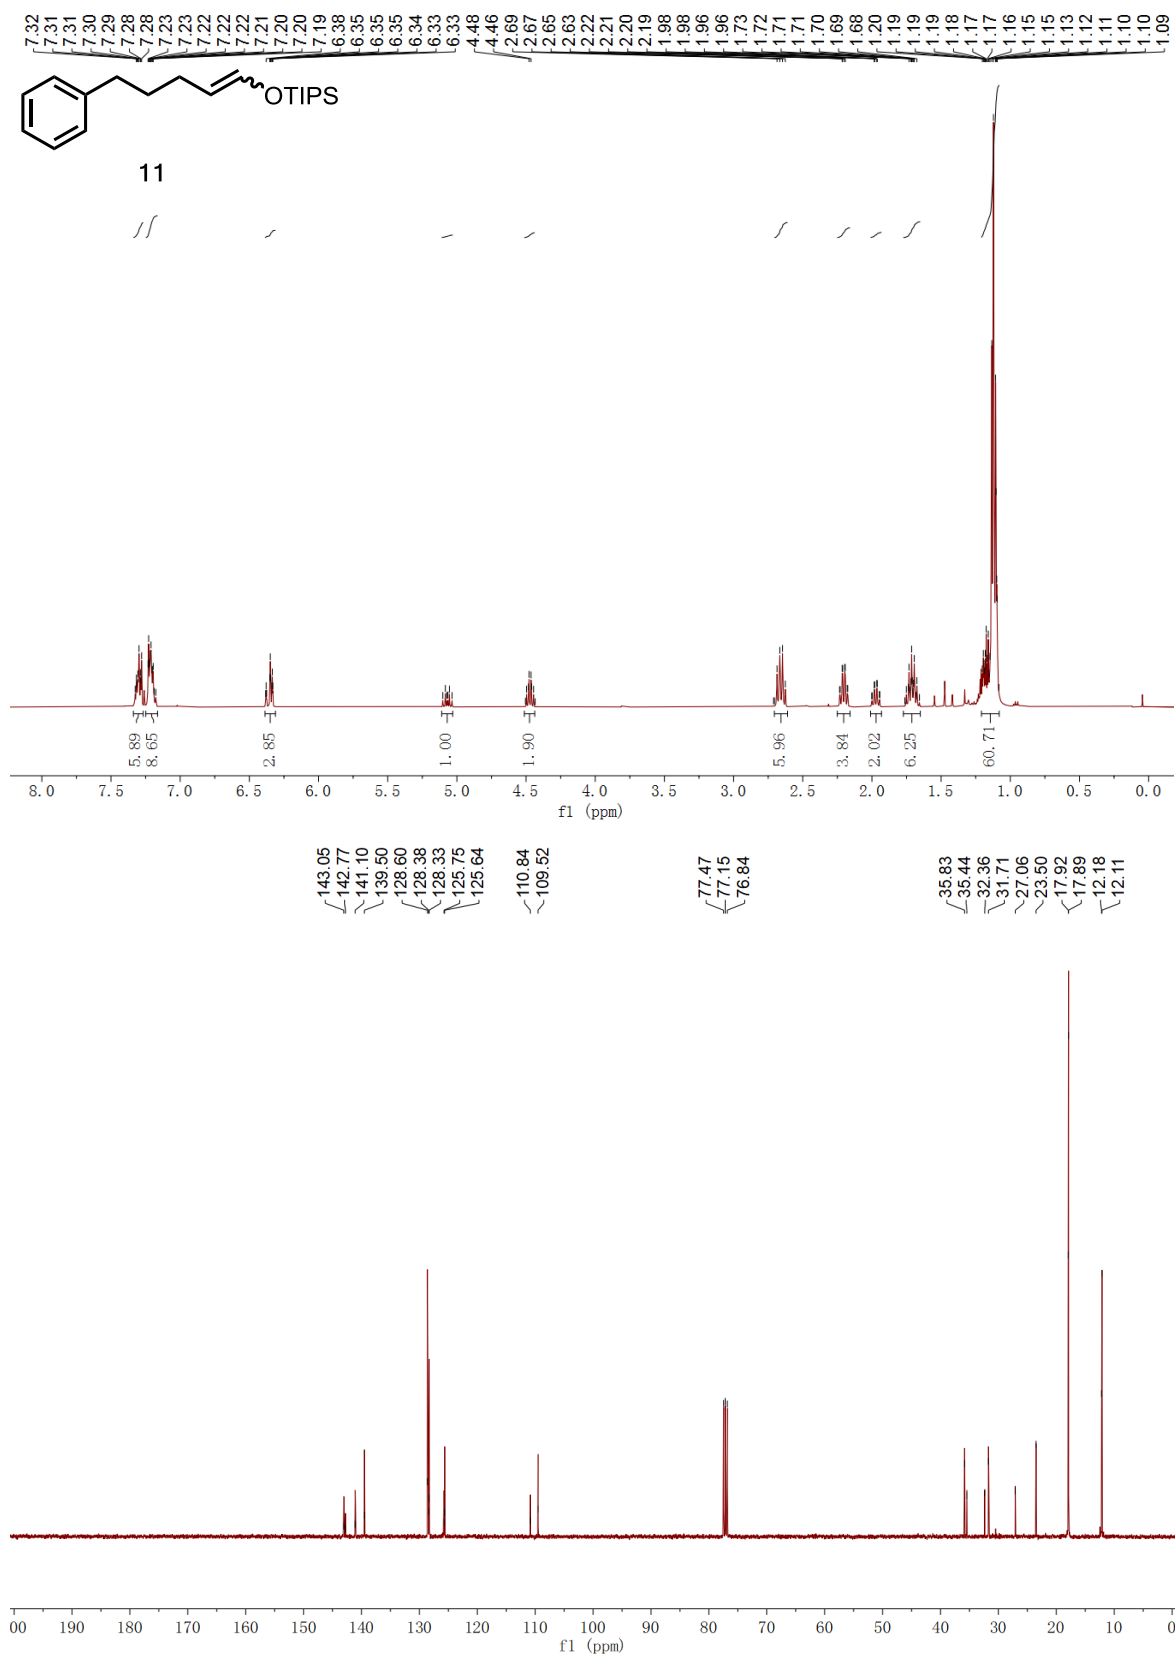

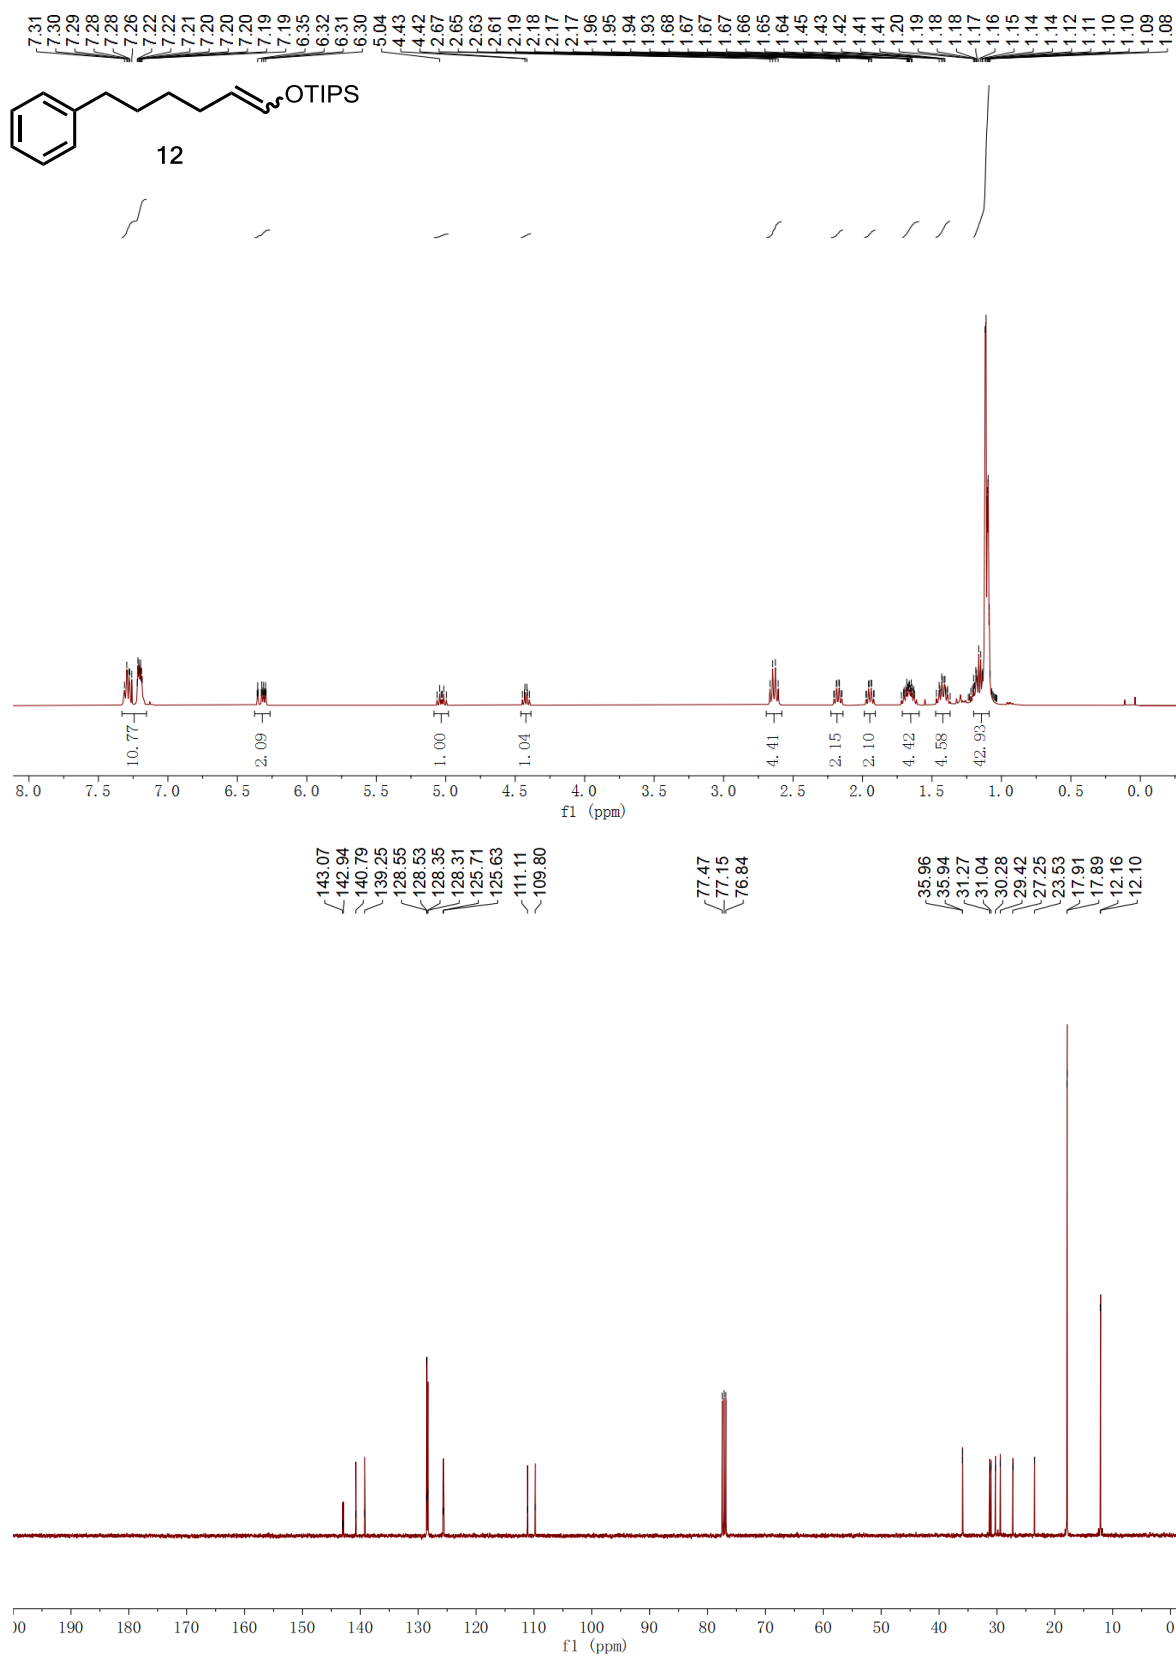

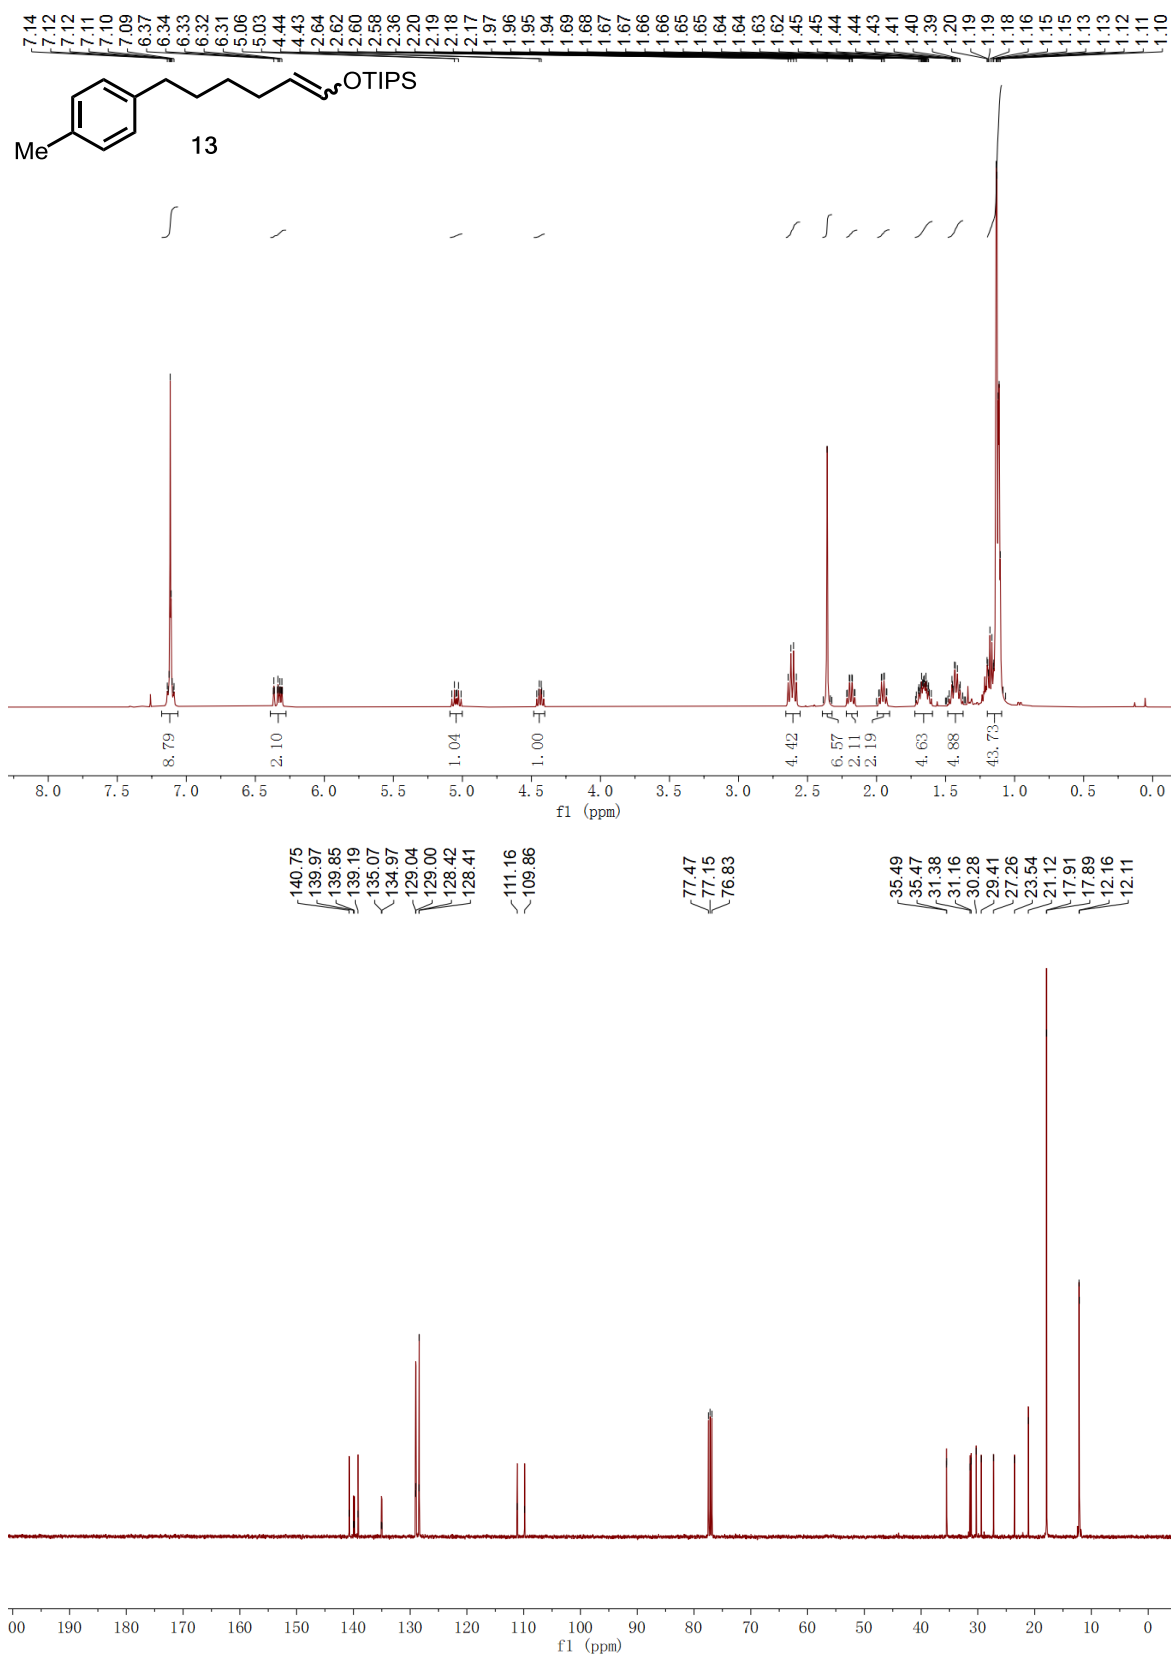



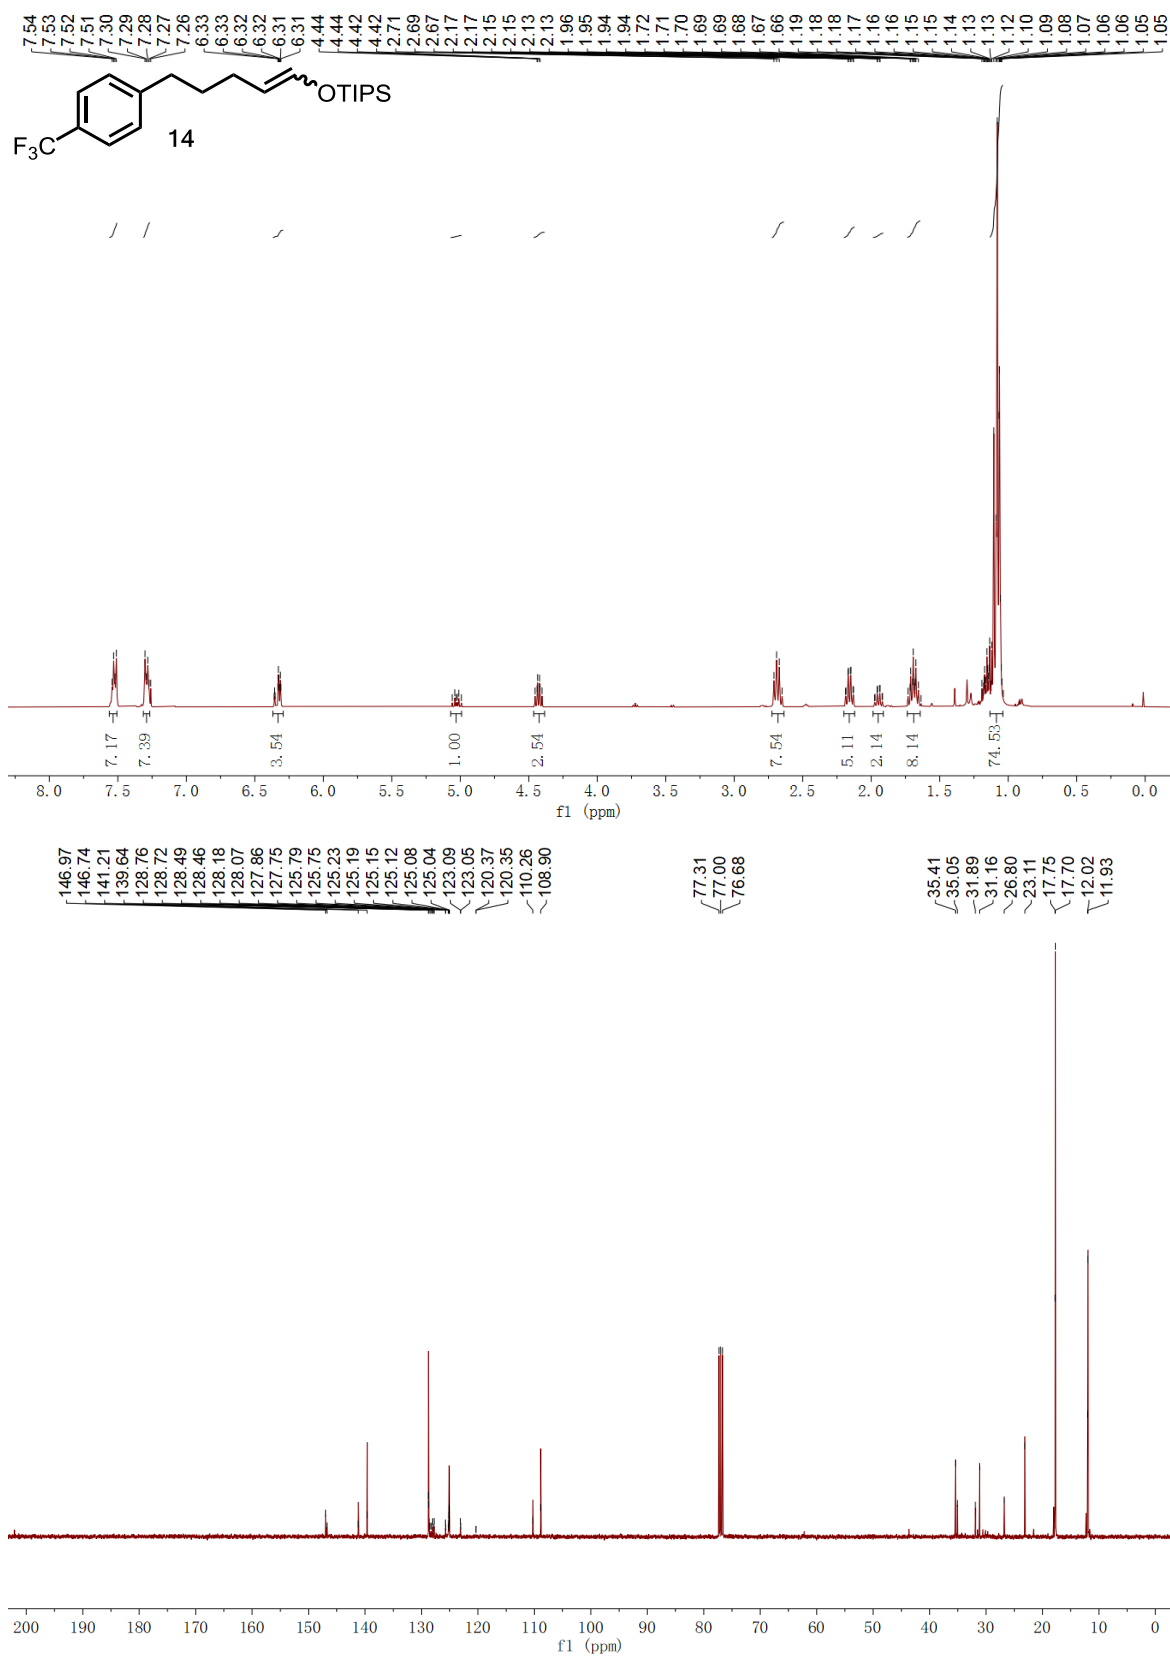

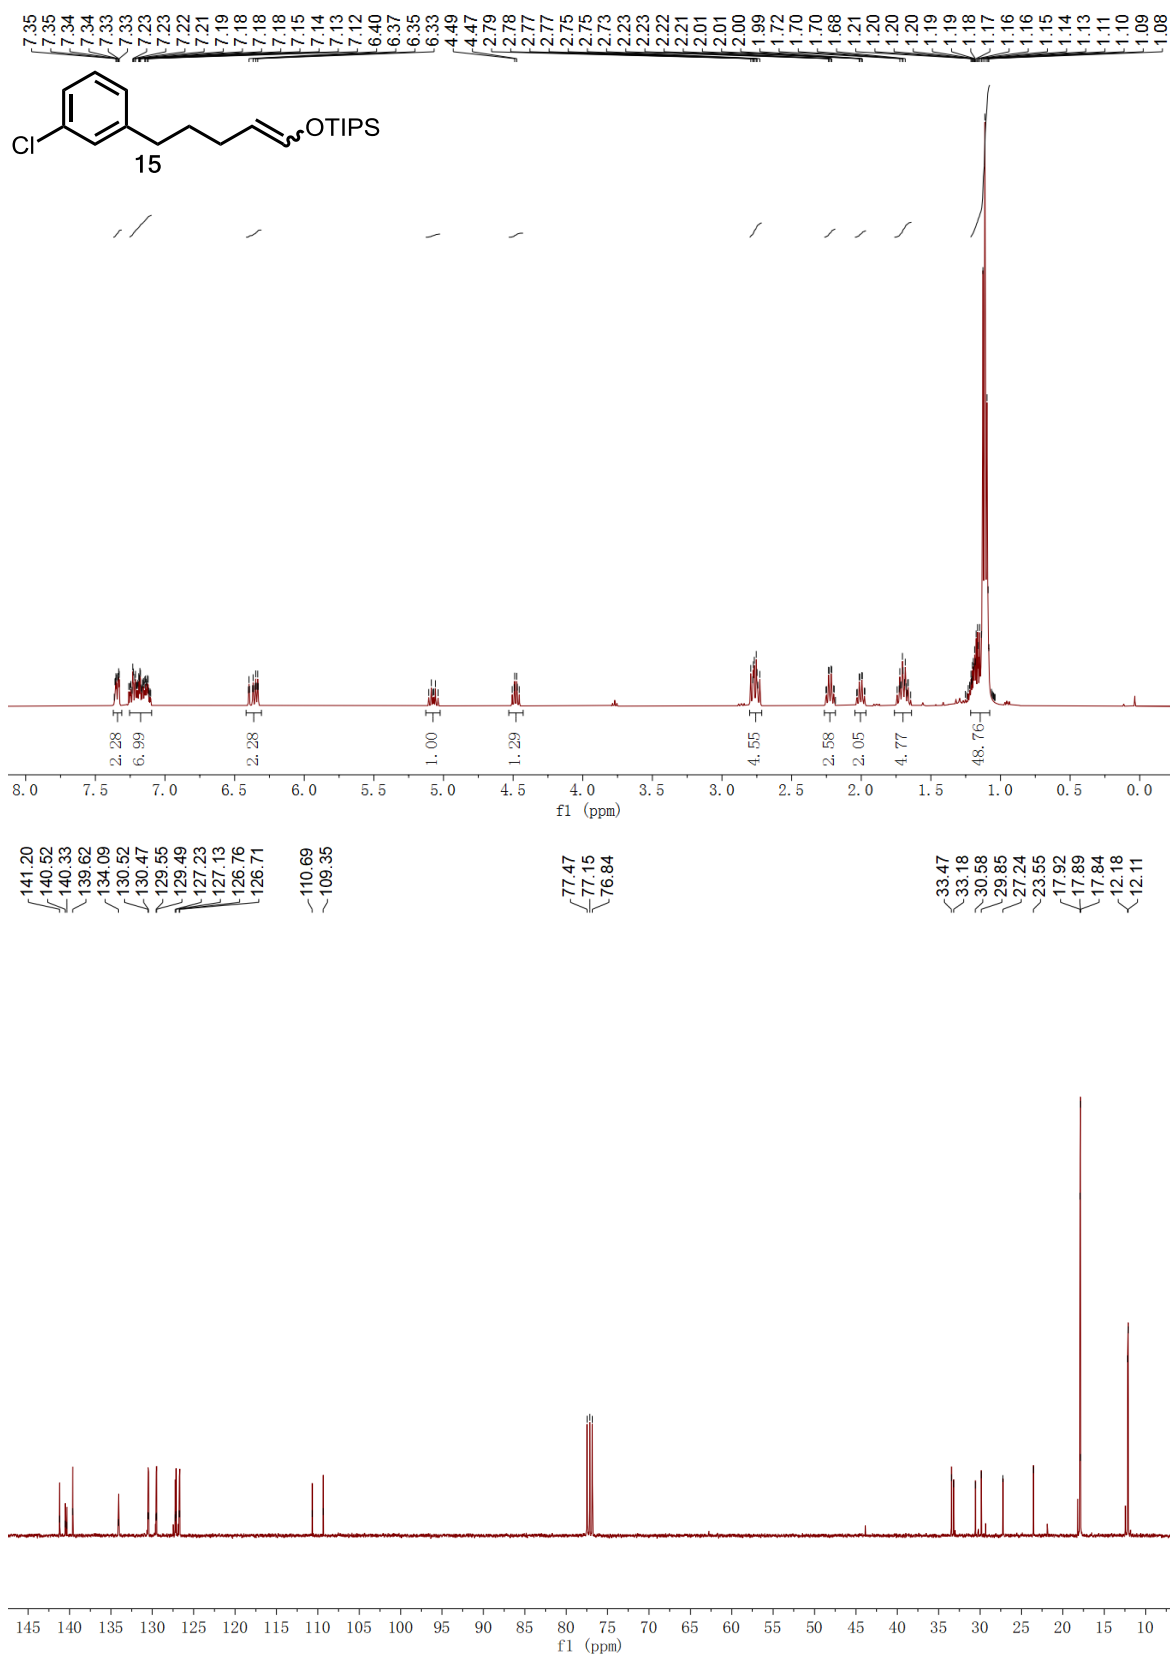

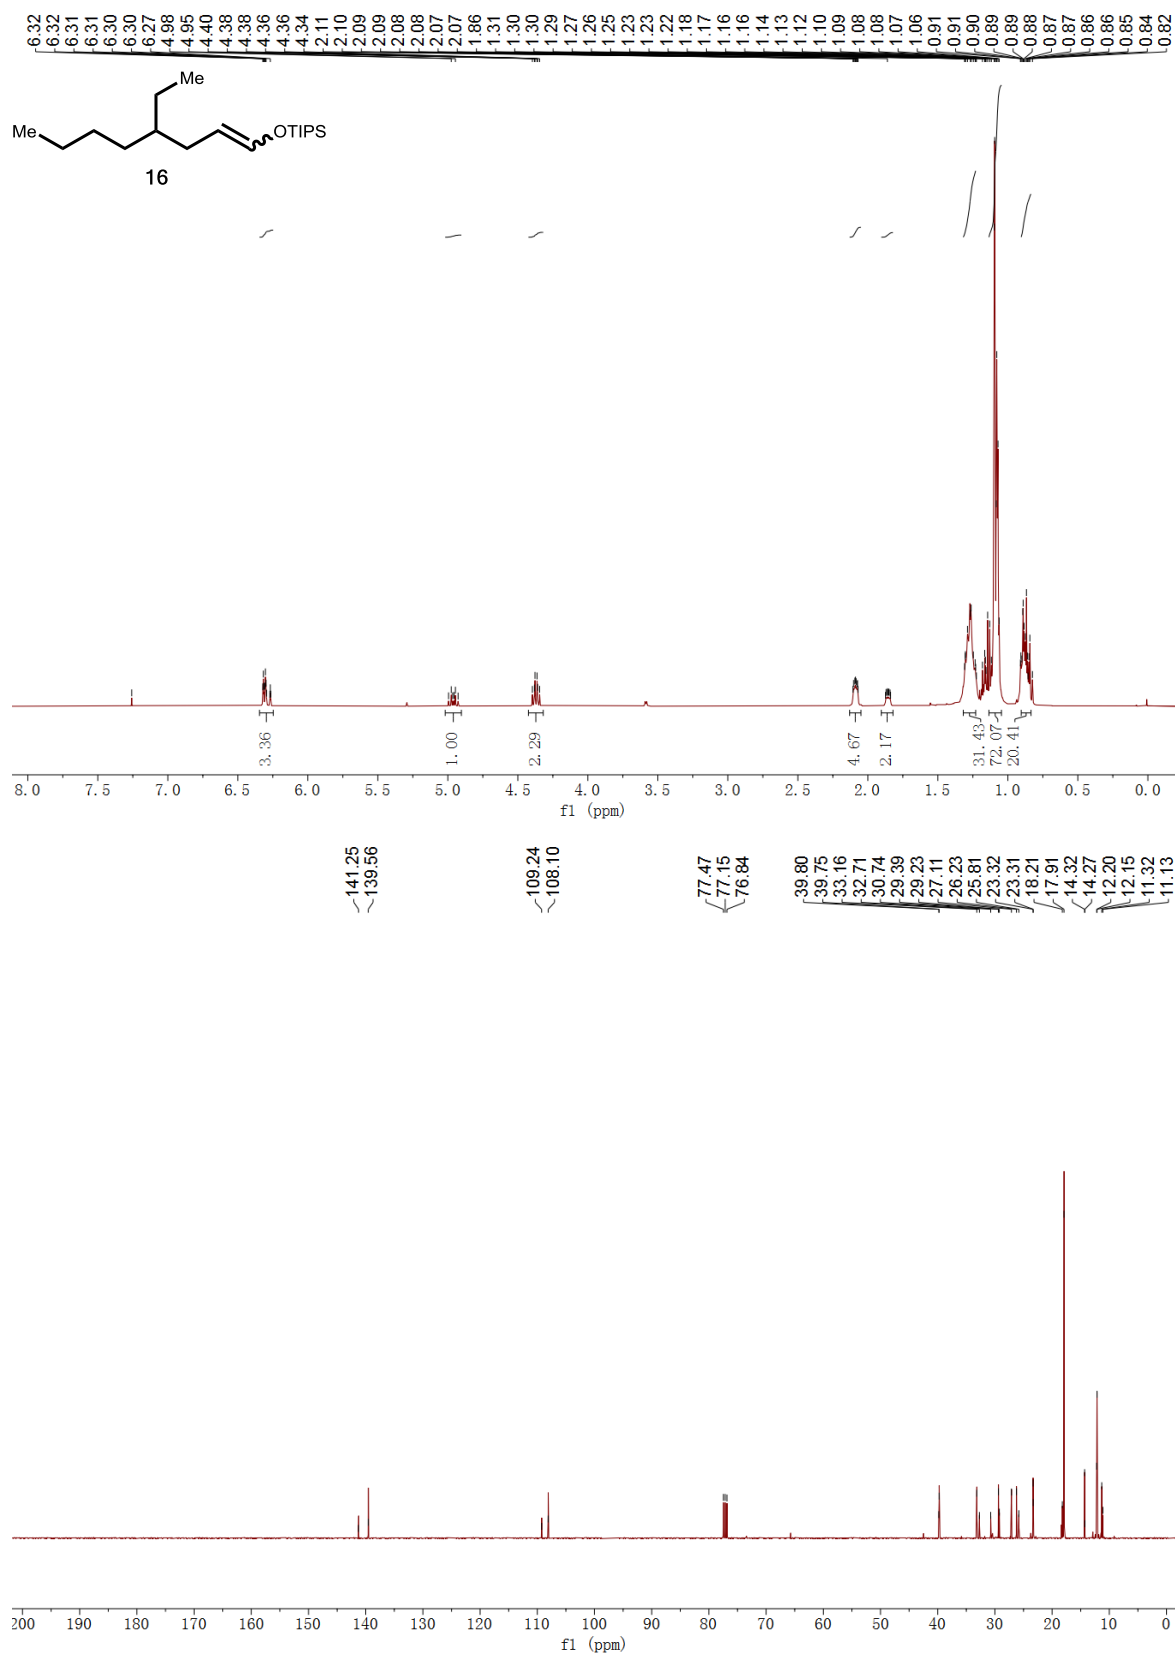

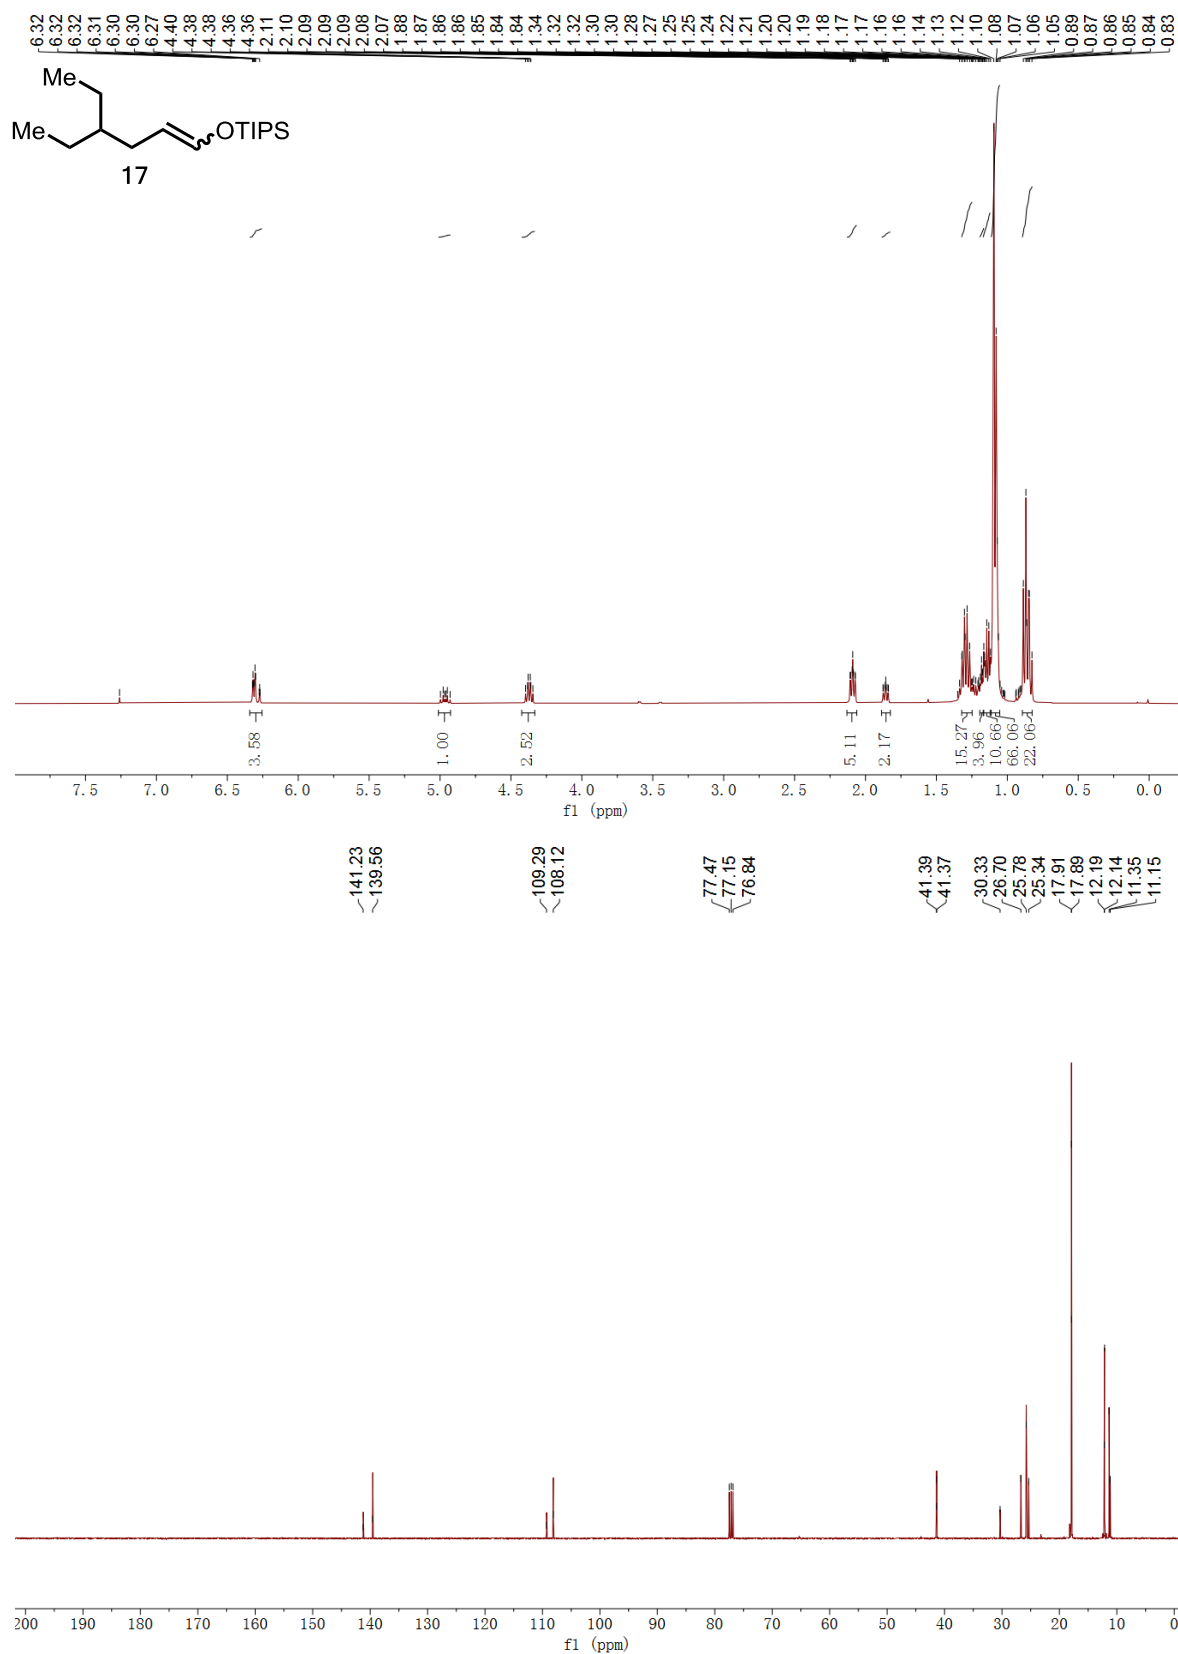

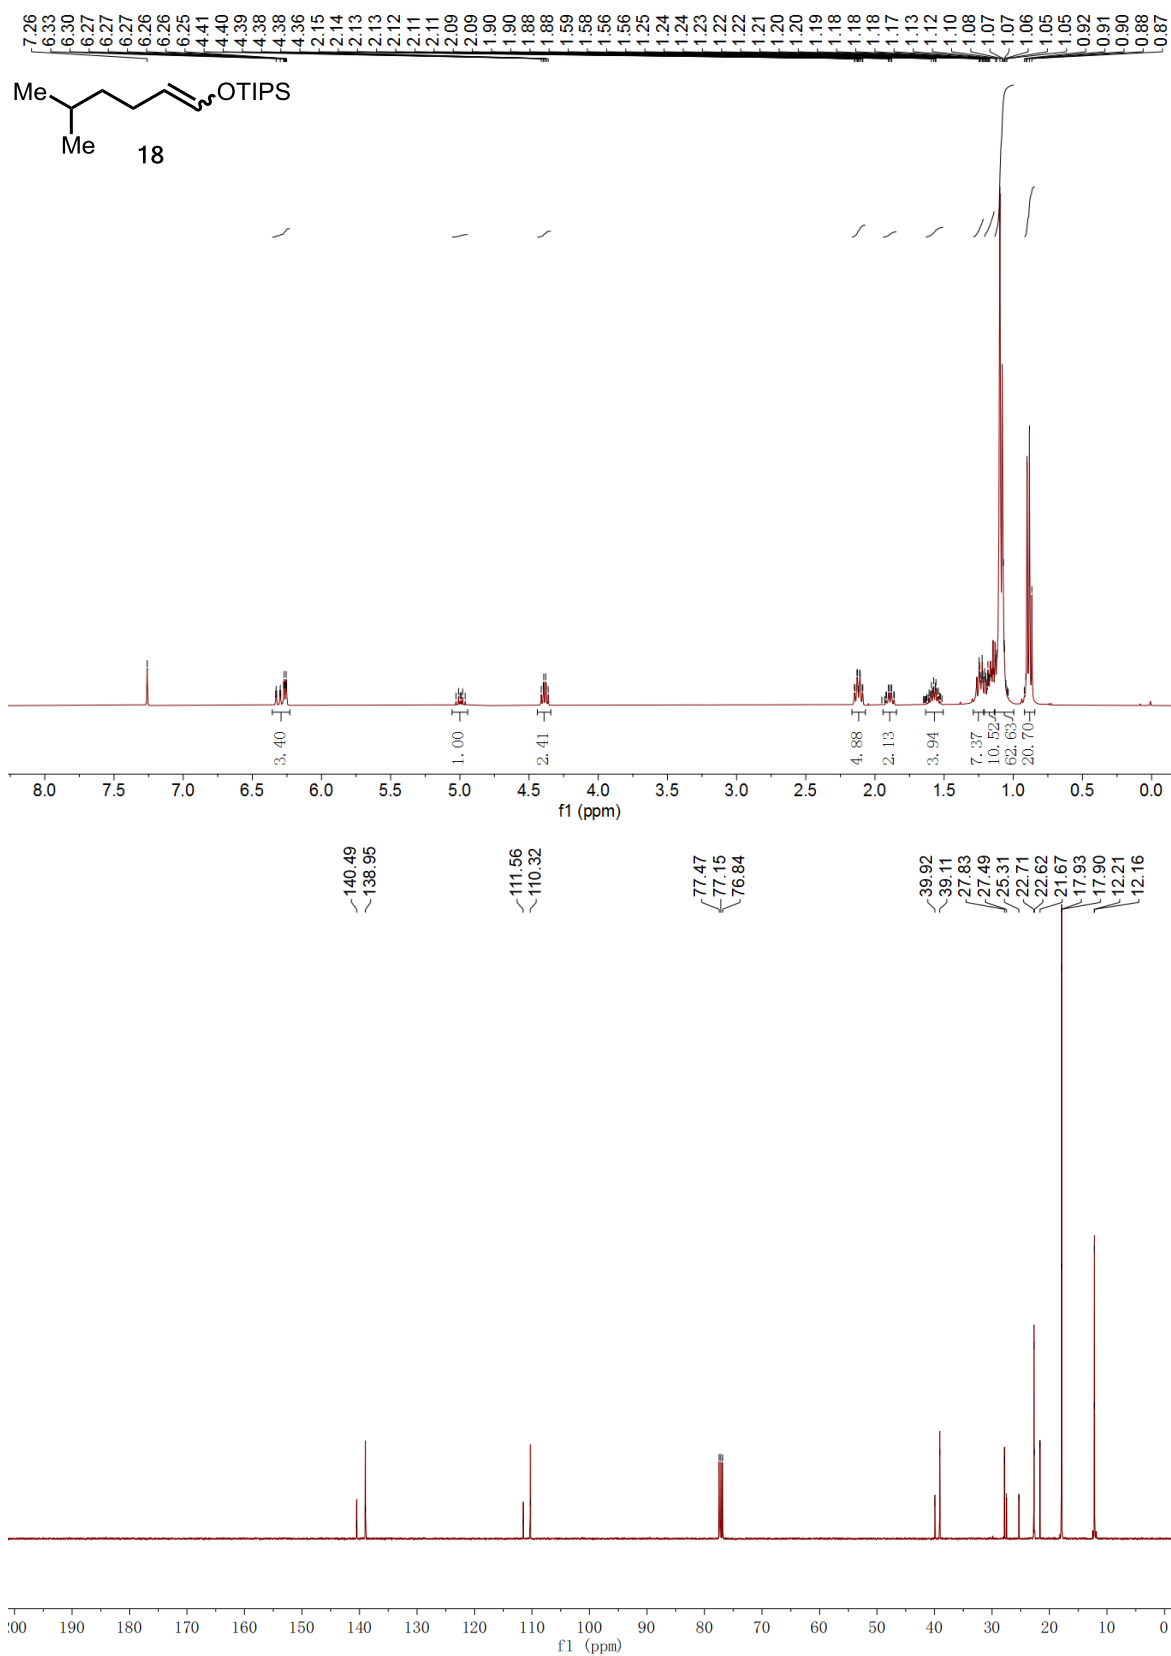

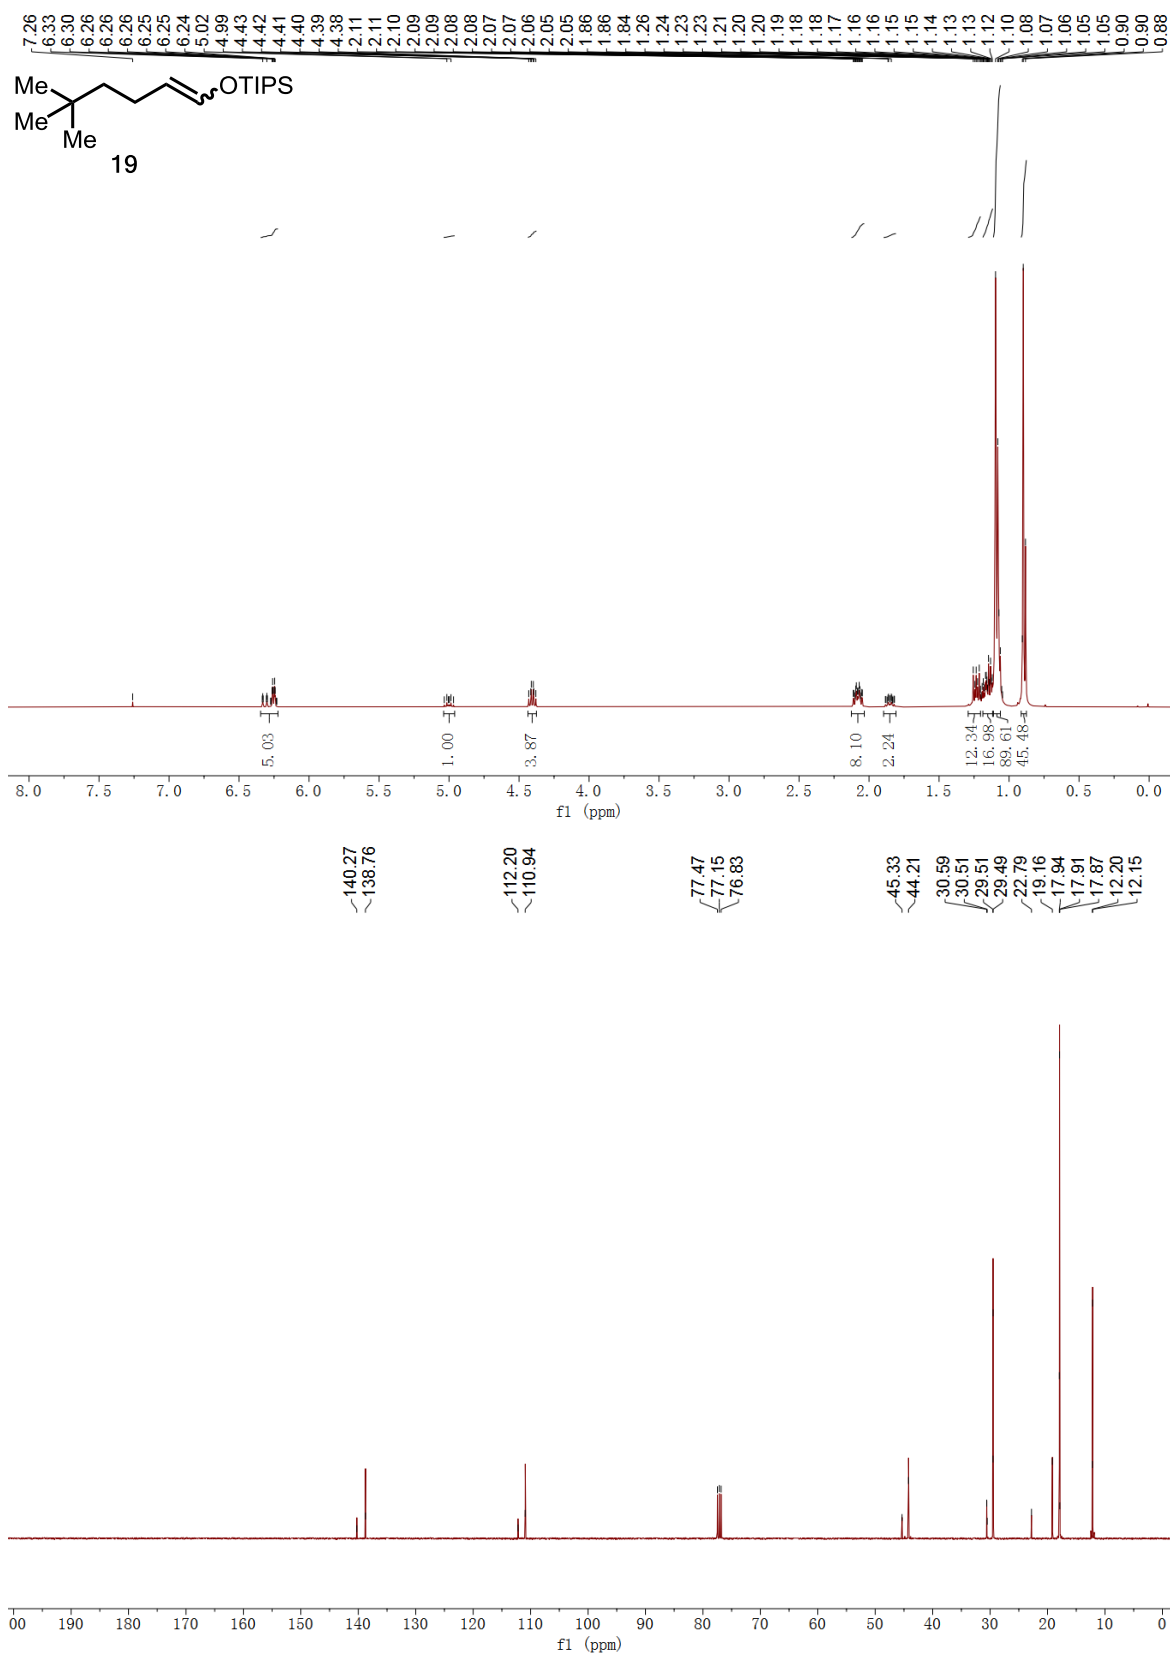

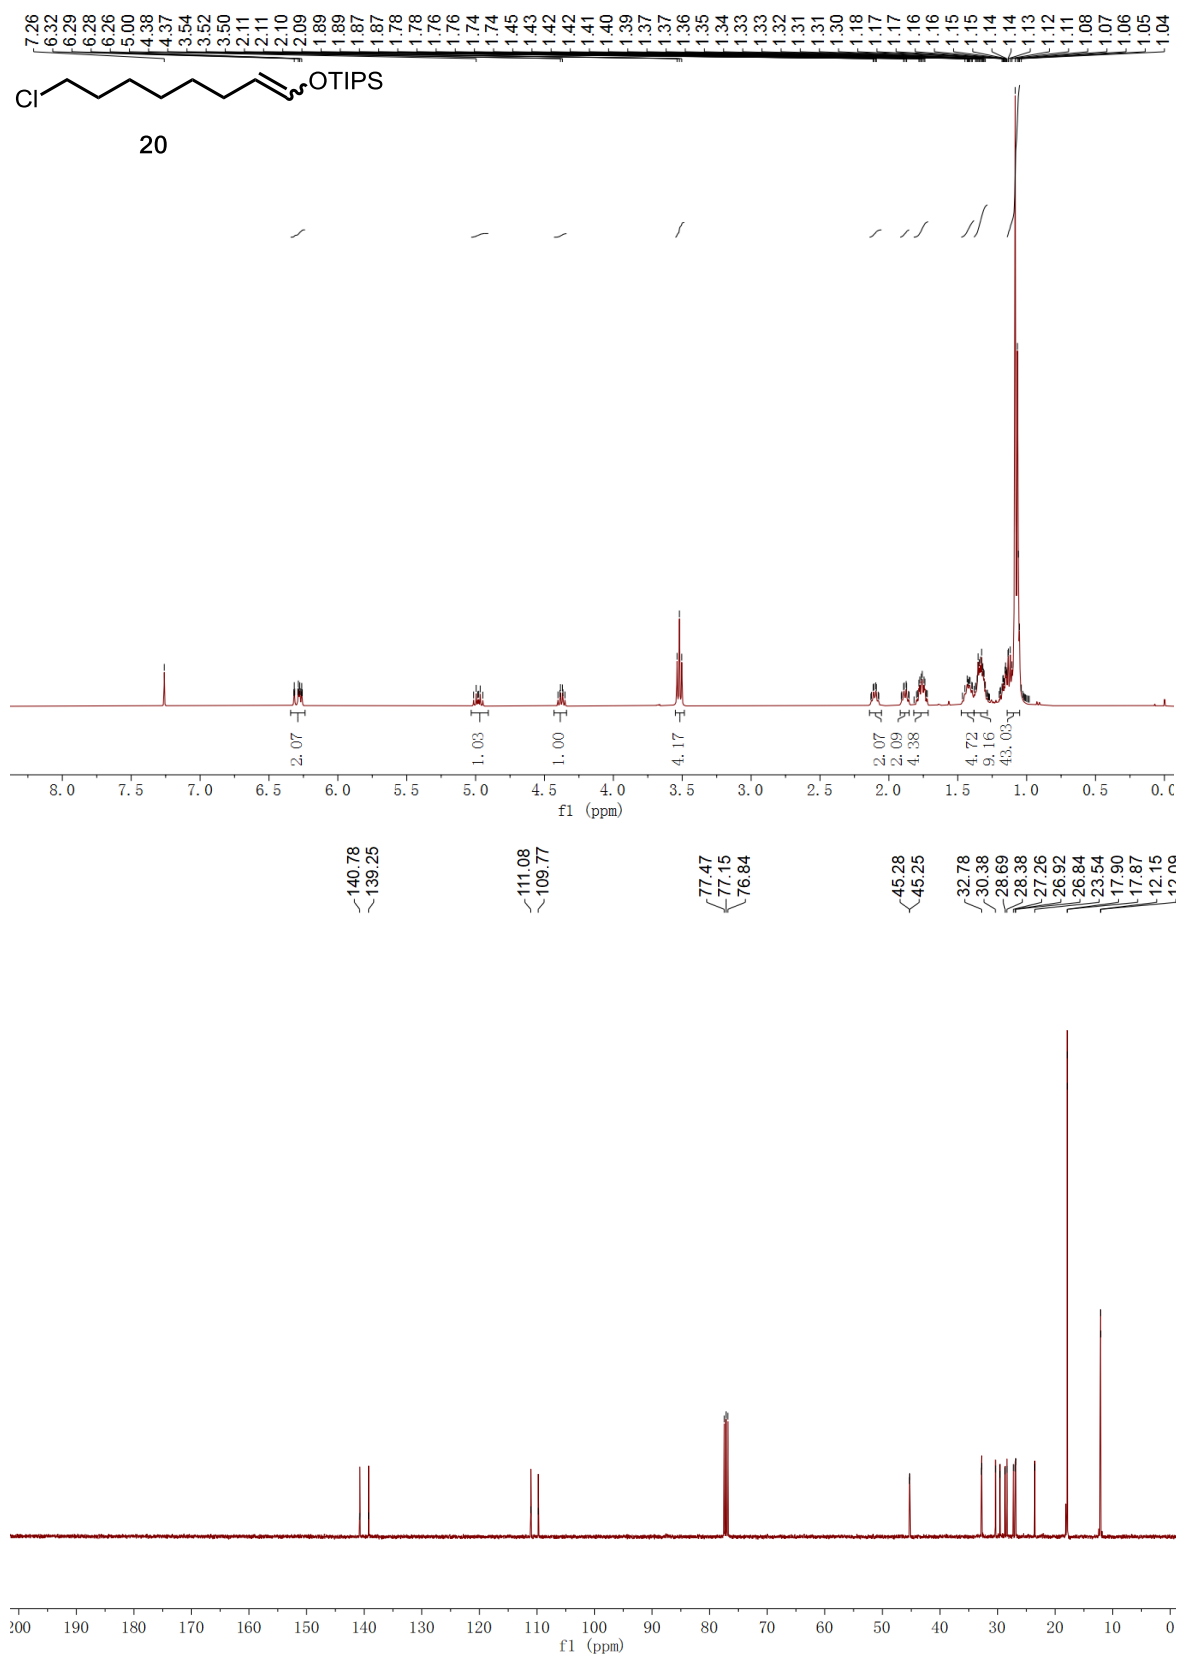

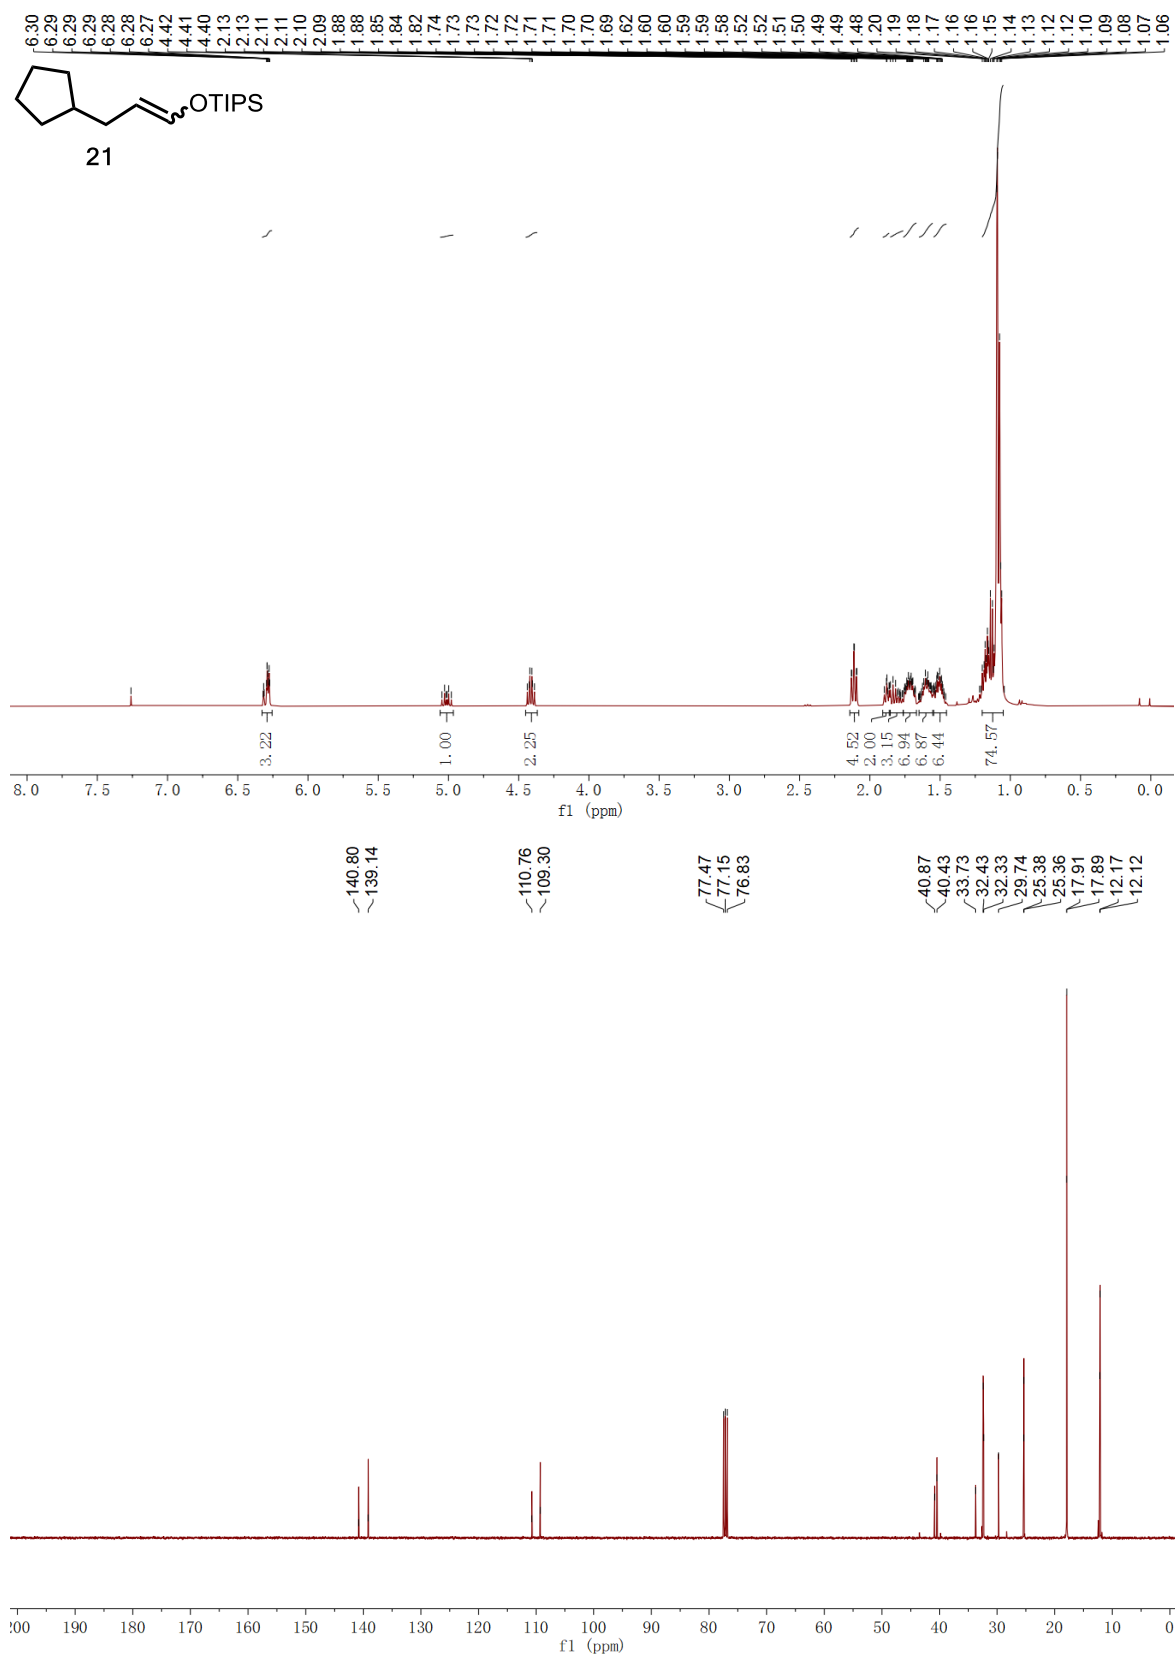



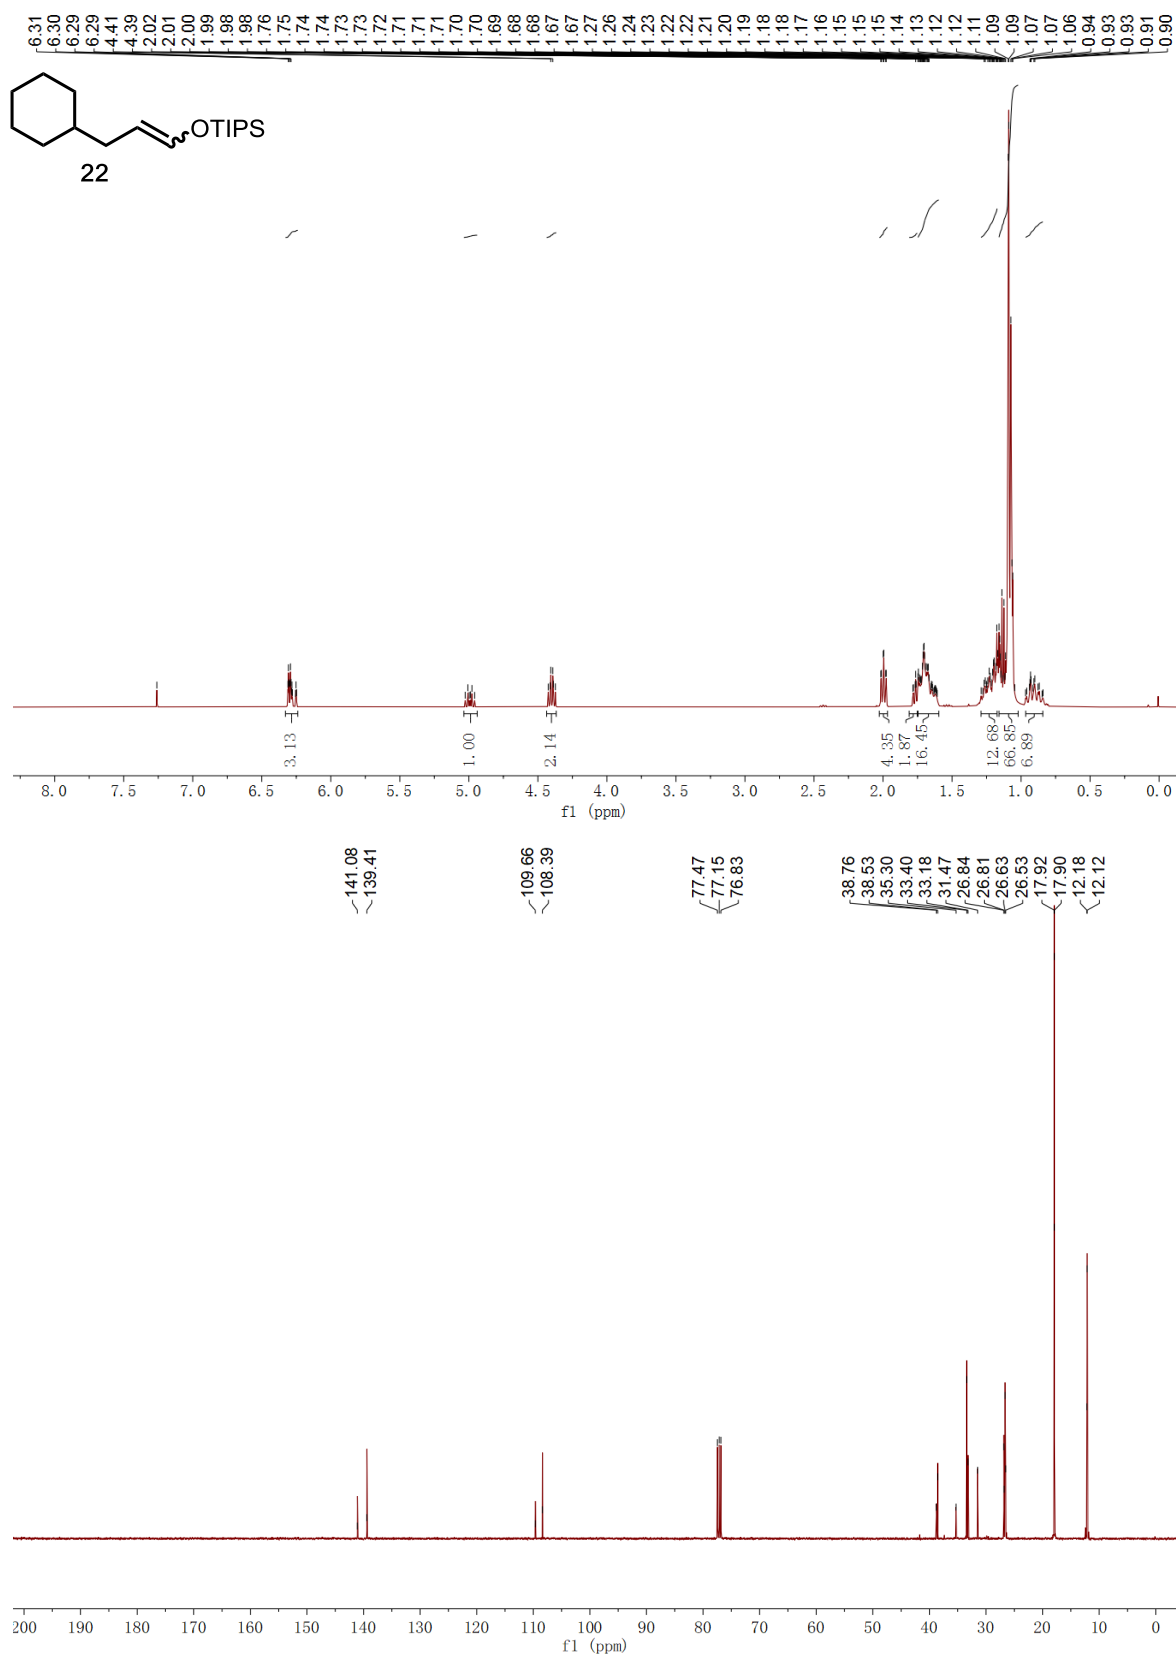

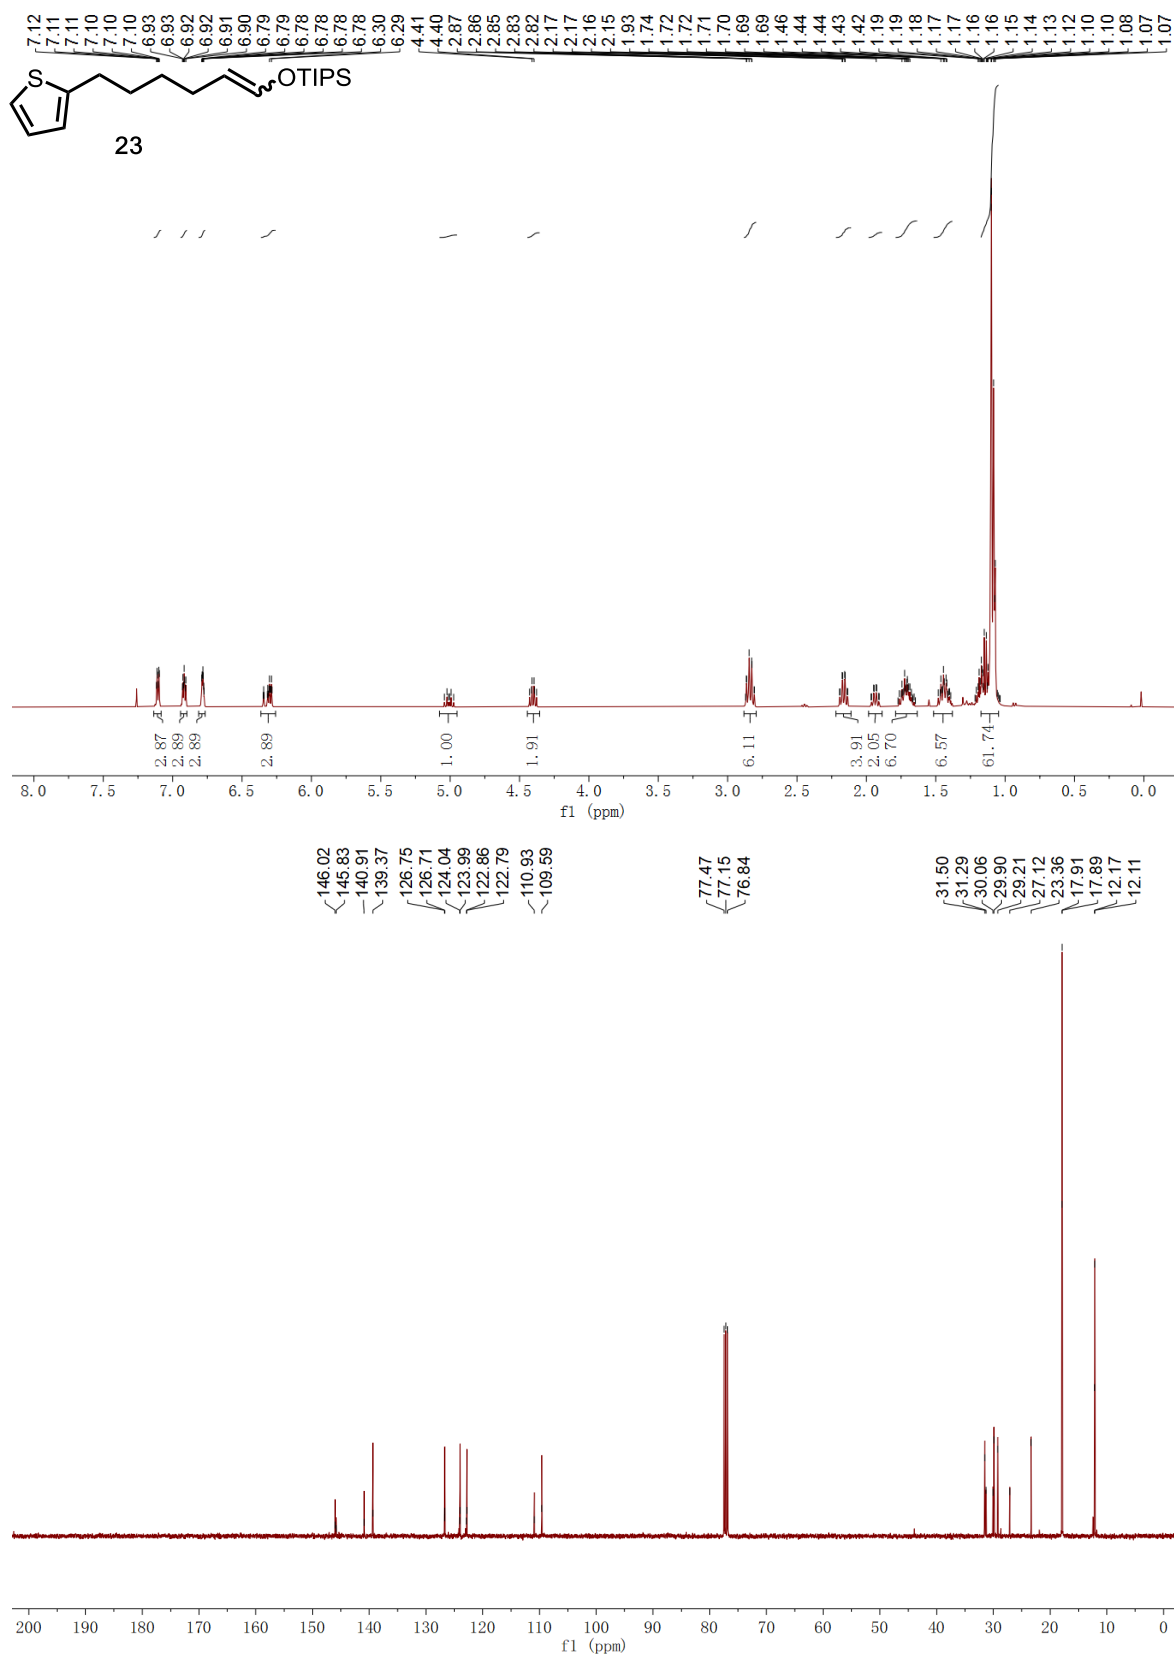

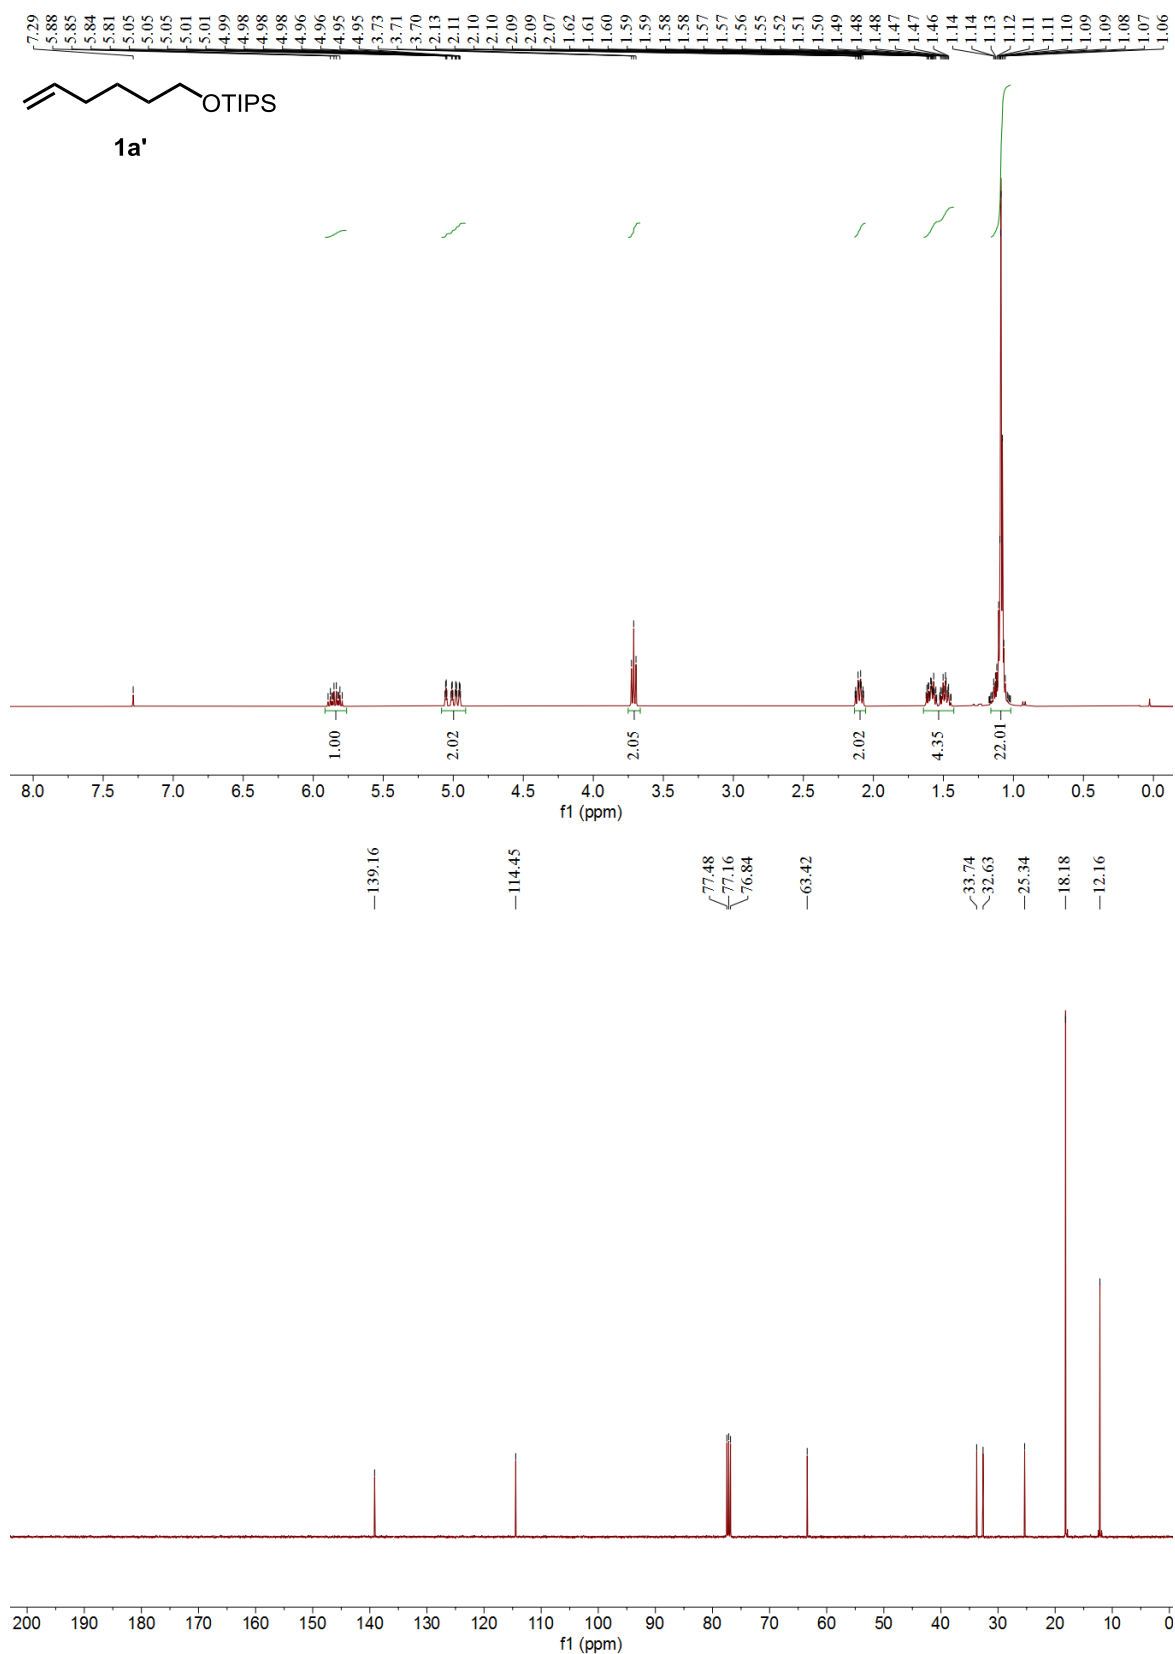

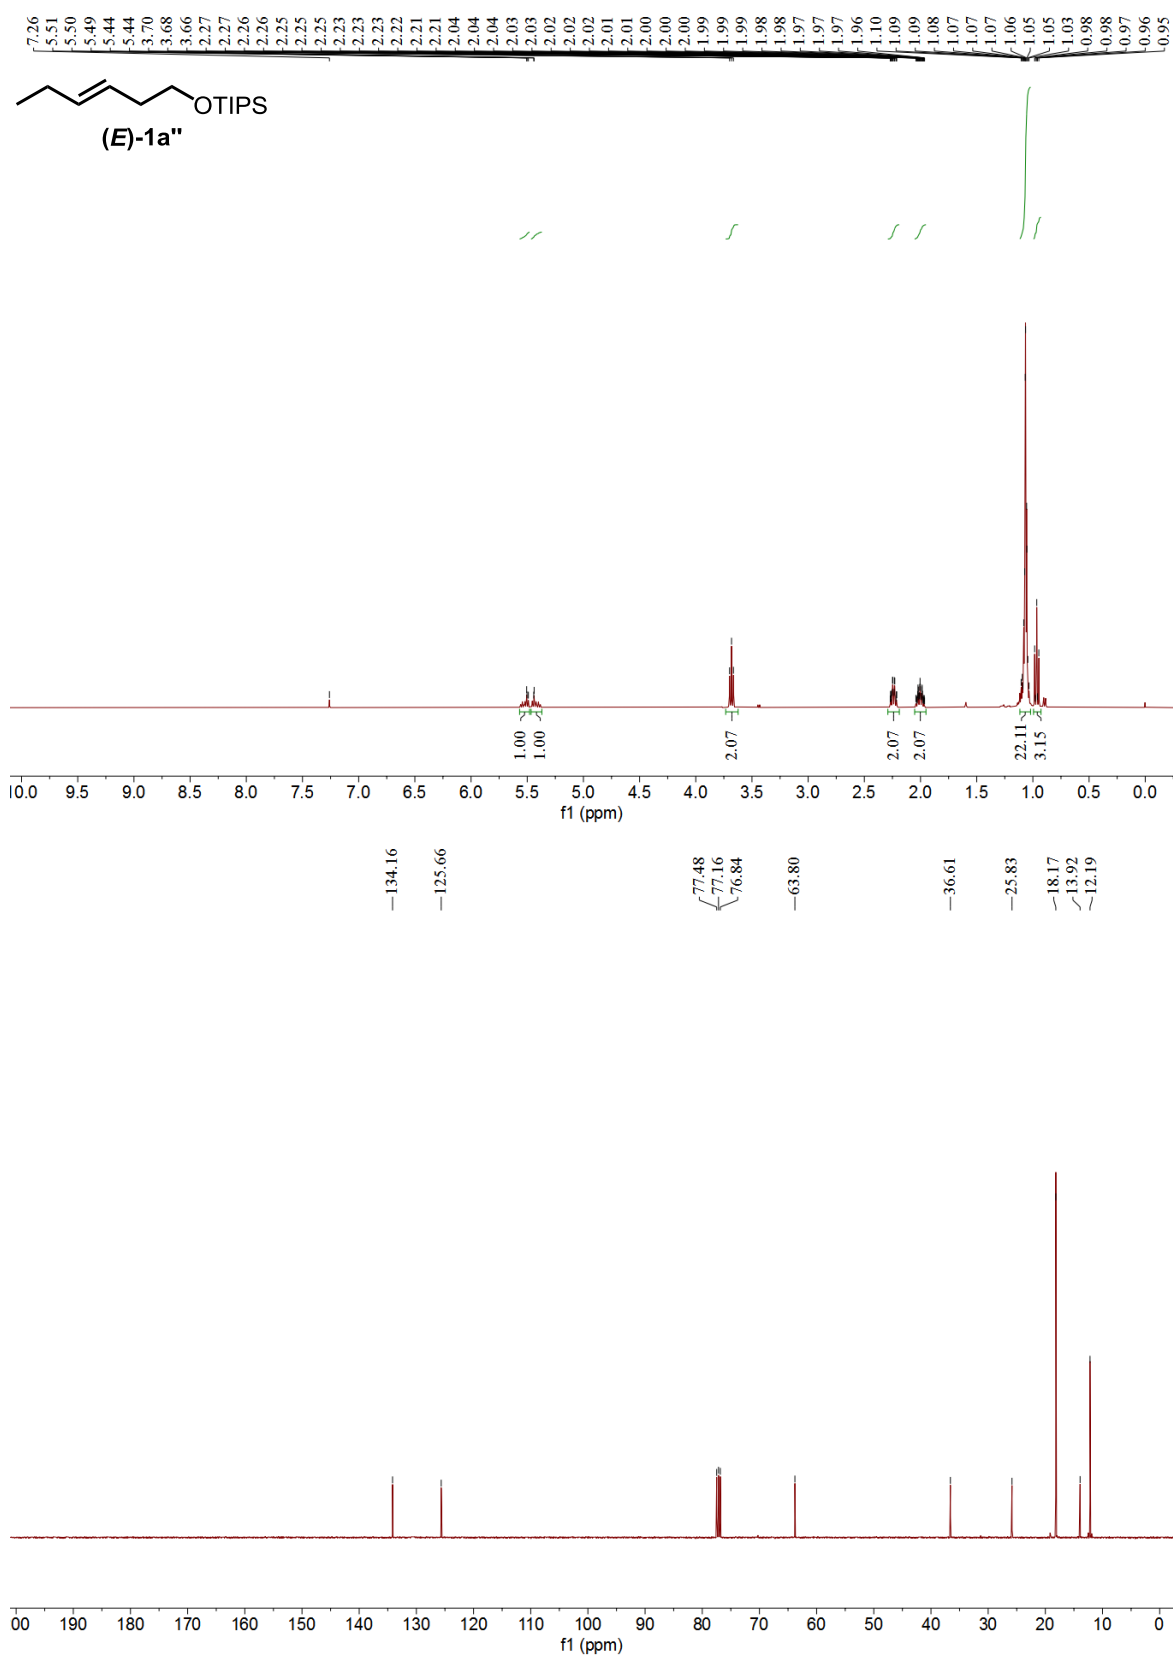



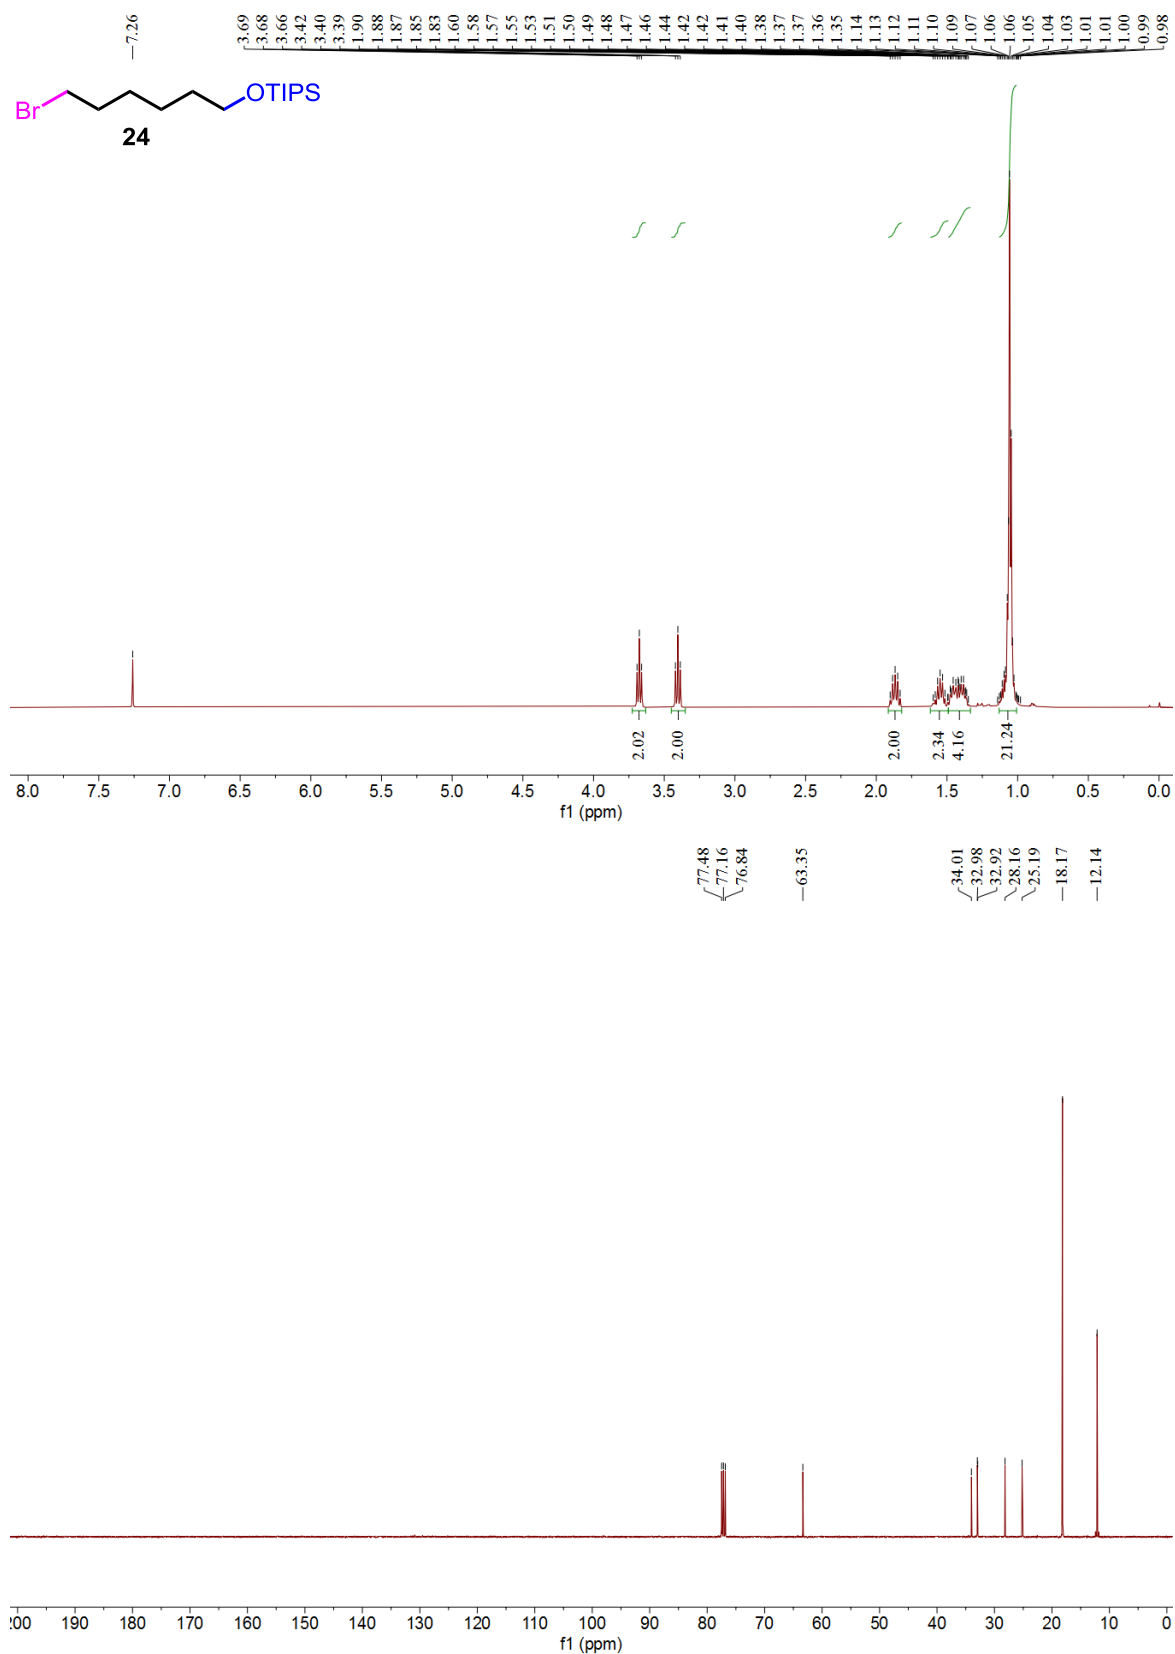

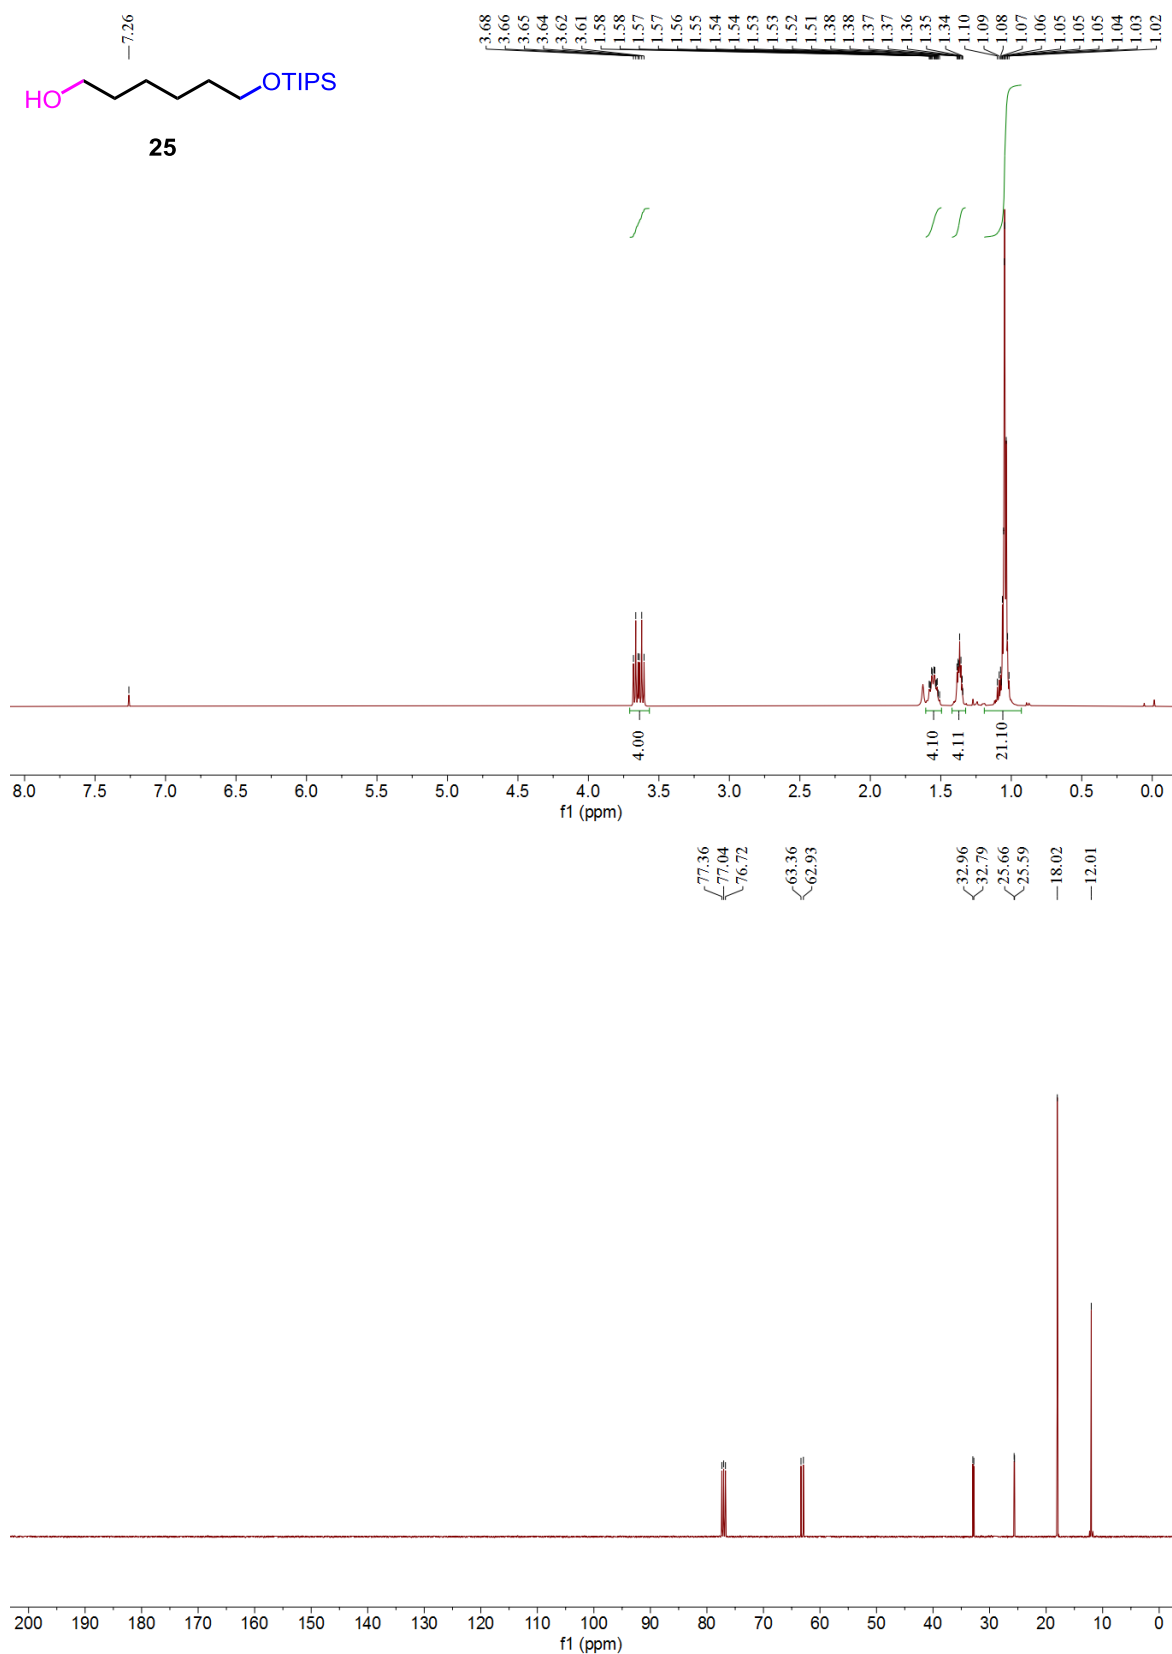

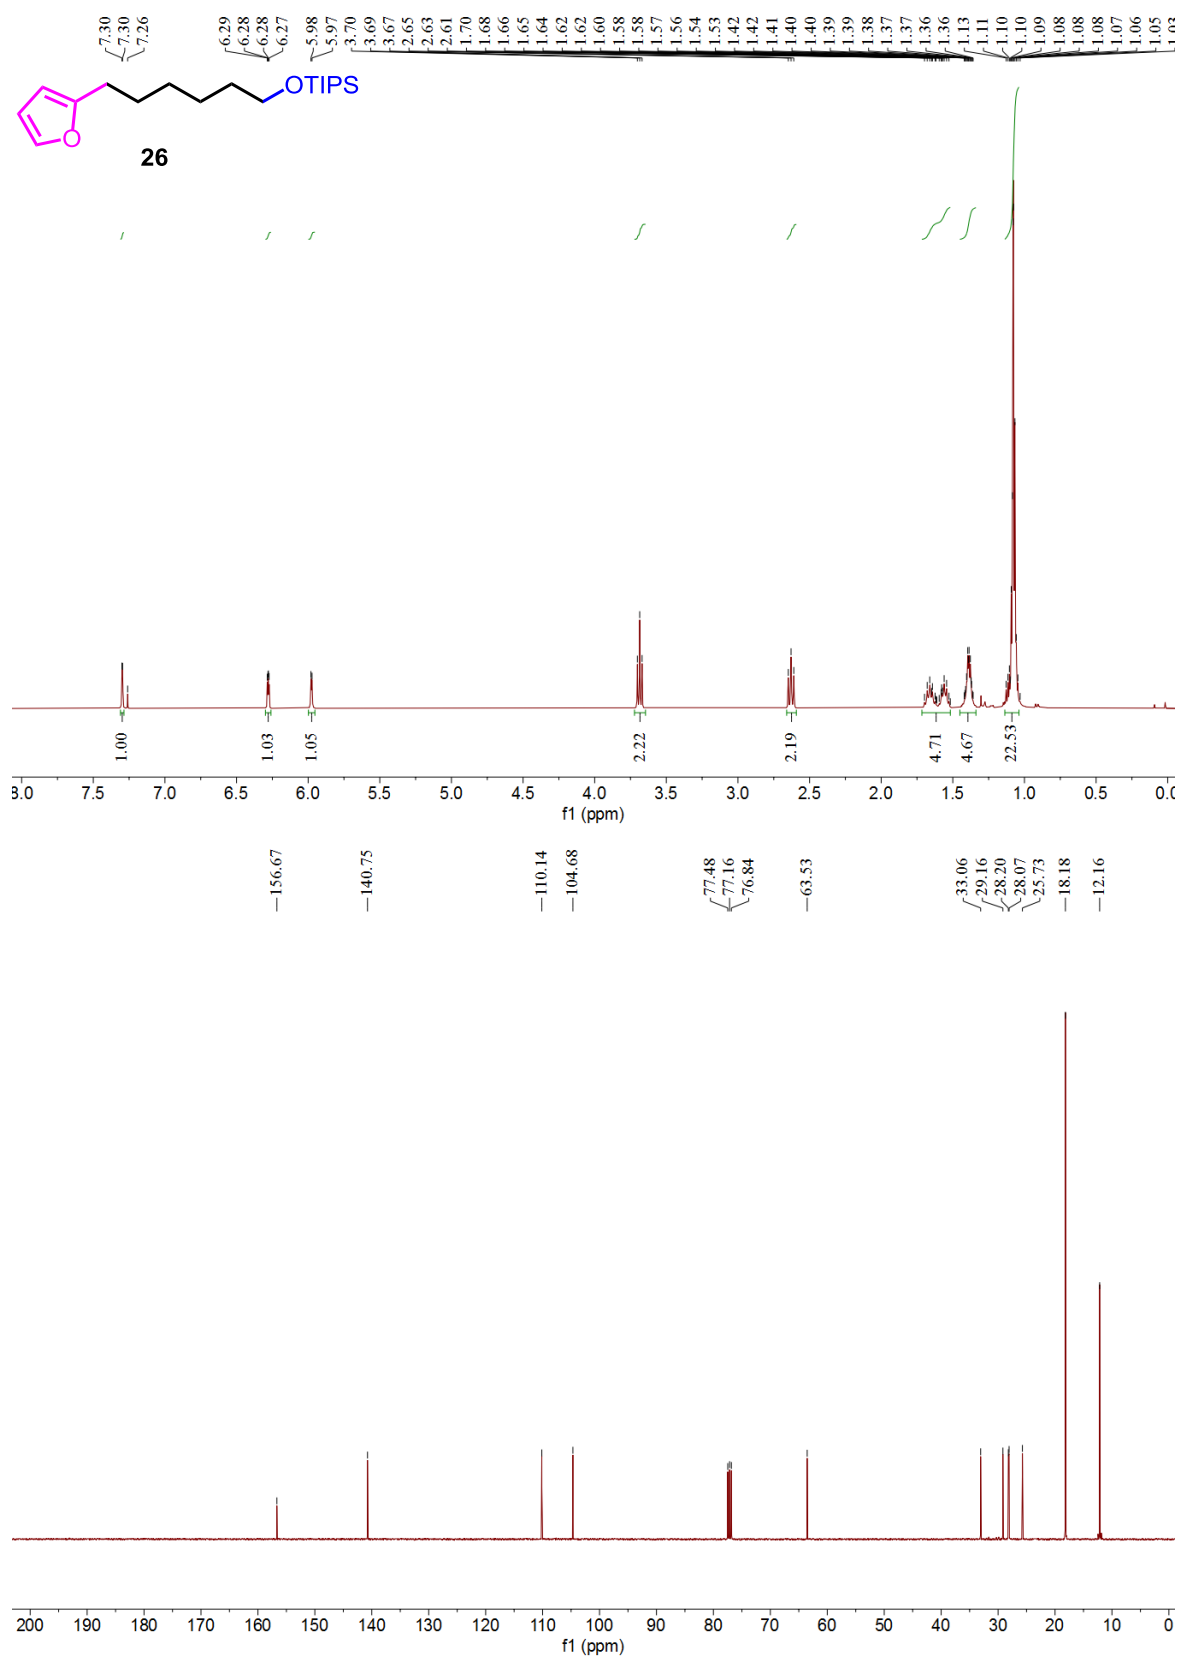



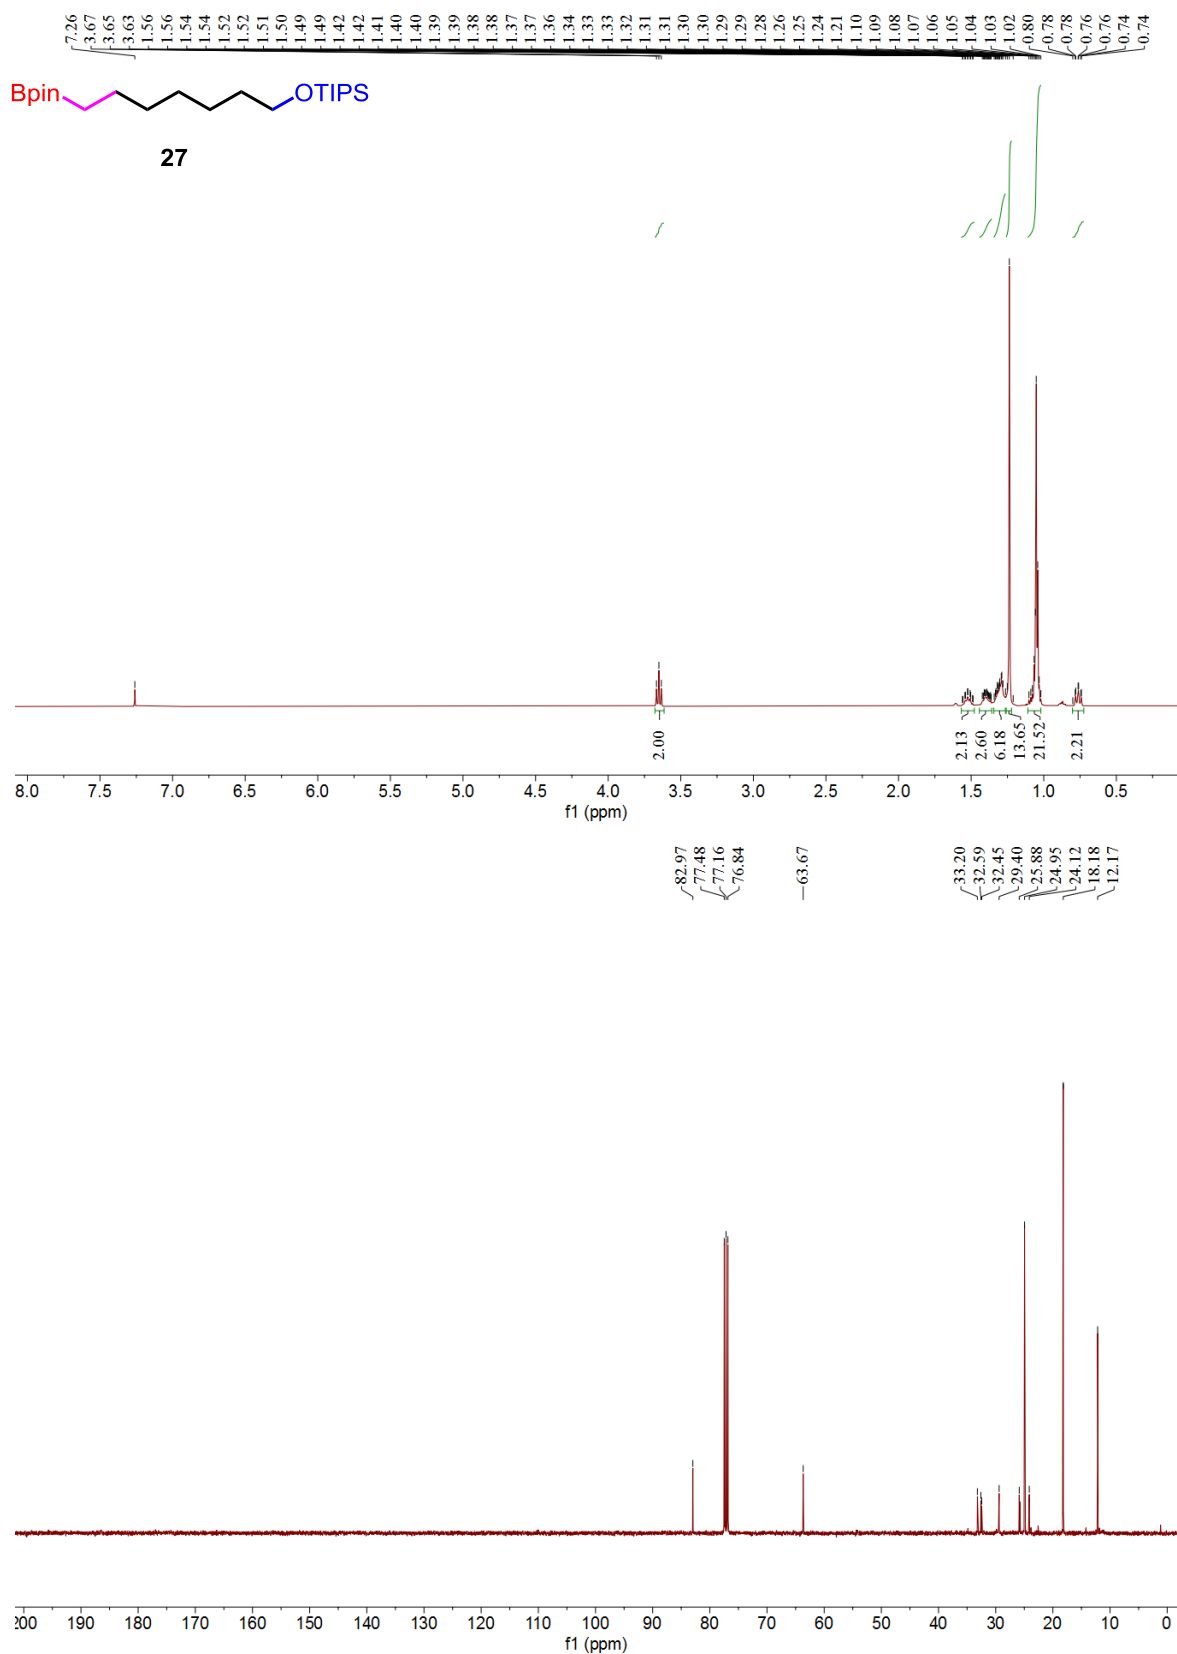



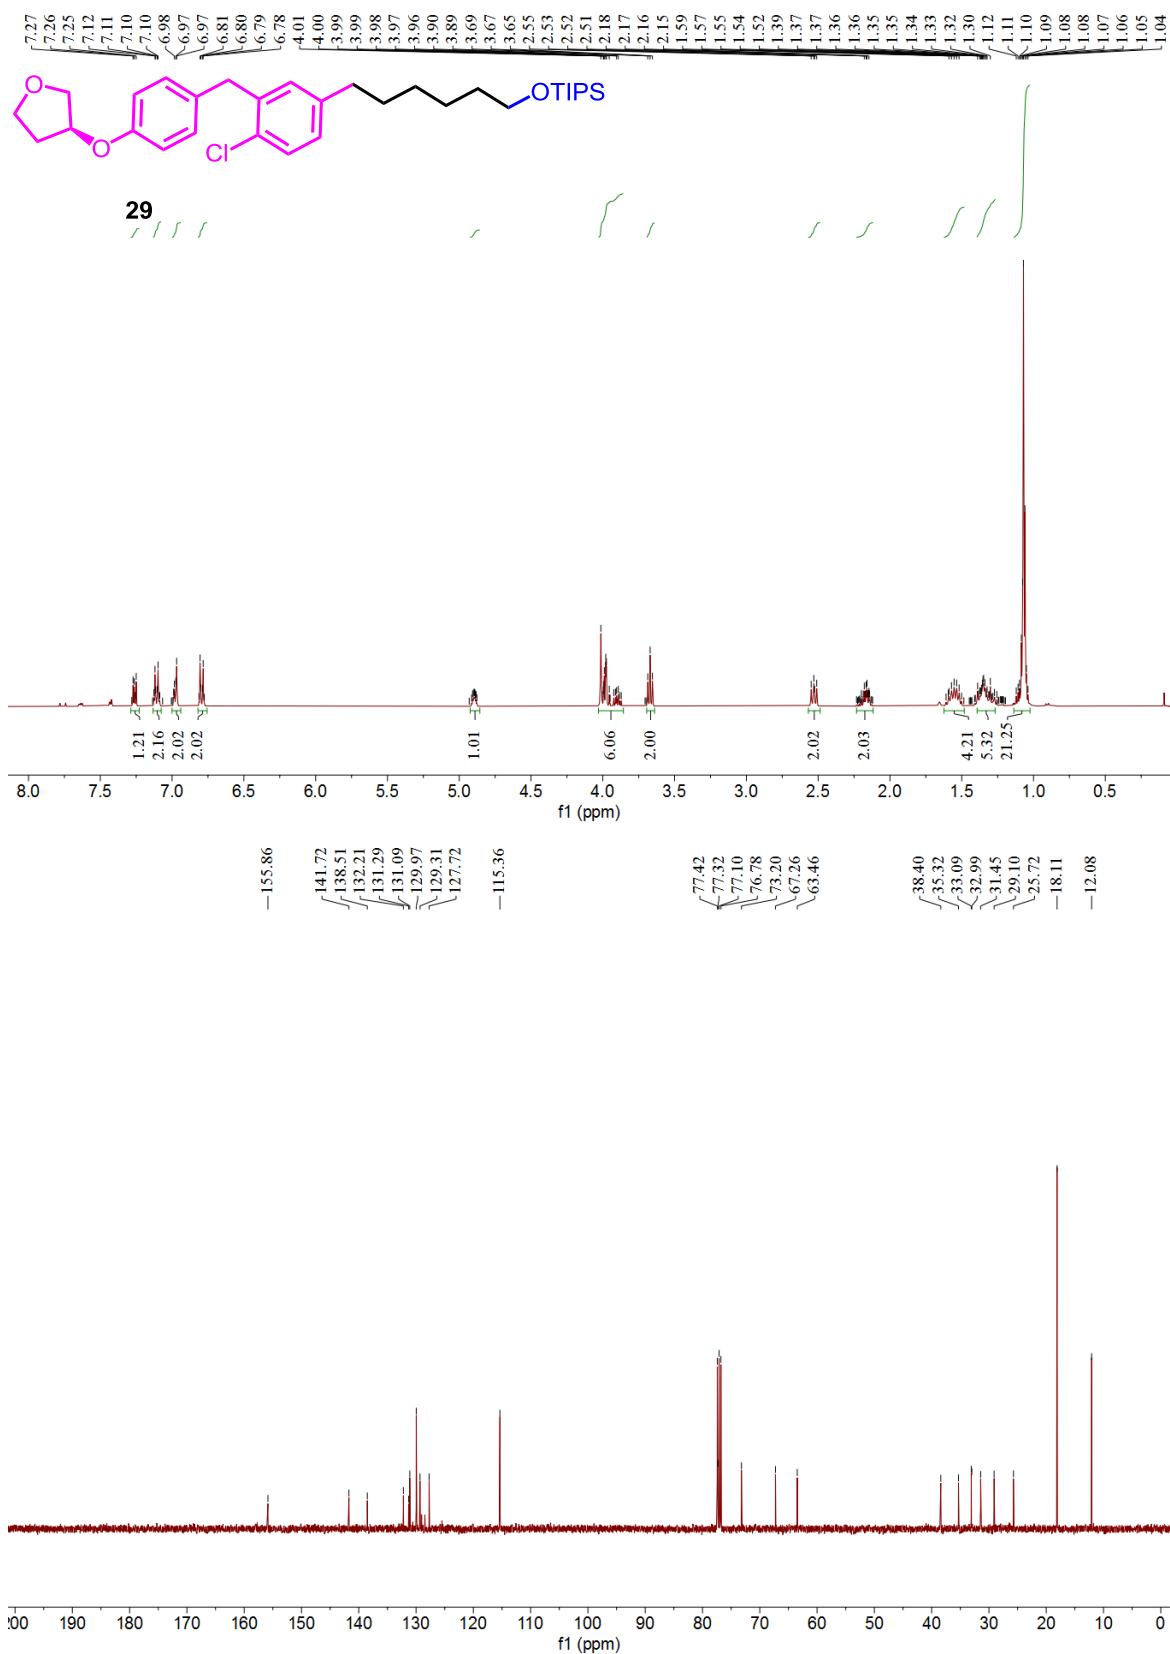

Supplement: d1cc05964e1.pdf [file d1cc05964e1.pdf]
